# Supplementary material for: Identification of Nitrogen Starvation-Responsive miRNAs to Reveal the miRNA-Mediated Regulatory Network in Betula luminifera
Source: Front Genet. 2022 Aug 17;13:957505. doi: 10.3389/fgene.2022.957505 (PMC9428261; doi:10.3389/fgene.2022.957505)
Supplement: Supplementary file 6 [file Table5.XLSX]

## Sheet: pairs
Table S5 The degradome sequencing result
SmallRNA	SmallRNA_seq	Transcript	Transcript Annotation	GO_Term	KEGG_pathways	Symbol	AlignmentScore	AlignmentRange	DegradomeDetection	zjhD1_TPB	DegradomeCleavageSite	zjhD1_DegradomeReadNumber_Raw	zjhD1_DegradomeReadNumber_Normalized	zjhD1_DegradomeCategory	zjhD1_Degradome_Pvalue	zjhD1_Tplot_file_path
blu-miR10-3p	TTTGCAAGAATTGGACGGAGG	TRINITY_DN44740_c0_g5	PREDICTED: exocyst complex component SEC5A [Beta vulgaris subsp. vulgaris]	-	-	-	3	324-343	Y	43.7663	335	2	2	2	0.869368	.\4_T_Plot\zjhD1\TRINITY_DN44740_c0_g5--335--blu-miR10-3p_degradome.jpg
blu-miR11-3p	TGCCATCCTCTTGTGACACG	TRINITY_DN49477_c0_g2	PREDICTED: uncharacterized protein LOC109011538 [Juglans regia]	GO:0032587(ruffle membrane);GO:0035091(phosphatidylinositol binding);GO:1900027(regulation of ruffle assembly)	-	SPAPJ696.02	4	917-935	Y	21.8832	926	1	1	4	0.795005	.\4_T_Plot\zjhD1\TRINITY_DN49477_c0_g2--926--blu-miR11-3p_degradome.jpg
blu-miR11-5p	TGTCGCAAGAGAGATGGTACT	TRINITY_DN53948_c0_g4	PREDICTED: calcium-transporting ATPase 8, plasma membrane-type-like [Juglans regia]	GO:0005388(calcium-transporting ATPase activity);GO:0005887(integral component of plasma membrane);GO:0043231(intracellular membrane-bounded organelle)	ko03018(RNA dkoadation)	ACA10	3	331-351	Y	109.416	342	5	5	2	0.492601	.\4_T_Plot\zjhD1\TRINITY_DN53948_c0_g4--342--blu-miR11-5p_degradome.jpg
blu-miR12-3p	CCATCCTCCTGTGCCAGTAT	TRINITY_DN42266_c0_g5	PREDICTED: uncharacterized protein LOC108992018 [Juglans regia]	GO:0005634(nucleus);GO:0009506(plasmodesma);GO:0016491(oxidoreductase activity);GO:0055114(oxidation-reduction process)	-	-	4	436-454	Y	87.5327	445	4	4	2	0.878854	.\4_T_Plot\zjhD1\TRINITY_DN42266_c0_g5--445--blu-miR12-3p_degradome.jpg
blu-miR12-3p	CCATCCTCCTGTGCCAGTAT	TRINITY_DN48950_c1_g2	PREDICTED: something about silencing protein 10 isoform X1 [Juglans regia]	GO:0000462(maturation of SSU-rRNA from tricistronic rRNA transcript (SSU-rRNA, 5.8S rRNA, LSU-rRNA));GO:0005730(nucleolus);GO:0032040(small-subunit processome)	-	-	4	272-290	Y	65.6495	282	3	3	2	0.878854	.\4_T_Plot\zjhD1\TRINITY_DN48950_c1_g2--282--blu-miR12-3p_degradome.jpg
blu-miR1-3p	TGAGCCGGAACCAATATCACTC	TRINITY_DN52516_c0_g3	PREDICTED: nodulation-signaling pathway 2 protein [Juglans regia]	GO:0003700(transcription factor activity, sequence-specific DNA binding);GO:0005634(nucleus);GO:0006355(regulation of transcription, DNA-templated);GO:0043565(sequence-specific DNA binding)	ko04075(Plant hormone signal transduction)	NSP2	2	478-498	Y	1422.41	490	65	65	0	0.016363	.\4_T_Plot\zjhD1\TRINITY_DN52516_c0_g3--490--blu-miR1-3p_degradome.jpg
blu-miR14-5p	TTGTTACAGGAGAGGCGGCACT	TRINITY_DN41298_c1_g6	-	-	-	-	1.5	148-169	Y	87.5327	160	4	4	2	0.595301	.\4_T_Plot\zjhD1\TRINITY_DN41298_c1_g6--160--blu-miR14-5p_degradome.jpg
blu-miR16-3p	TTAAATAAGAGAACTGGCTCC	TRINITY_DN51985_c0_g1	PREDICTED: 26S proteasome non-ATPase regulatory subunit 1 homolog A [Juglans regia]	GO:0004175(endopeptidase activity);GO:0005634(nucleus);GO:0008540(proteasome regulatory particle, base subcomplex);GO:0034515(proteasome storage granule);GO:0043161(proteasome-mediated ubiquitin-dependent protein catabolic process)	ko03050(Proteasome)	RPN2B	3.5	356-375	Y	21.8832	367	1	1	4	0.453227	.\4_T_Plot\zjhD1\TRINITY_DN51985_c0_g1--367--blu-miR16-3p_degradome.jpg
blu-miR18-3p	TTTTTTCGAGCACGGATT	TRINITY_DN40430_c0_g5	PREDICTED: 40S ribosomal protein S3a-like [Juglans regia]	GO:0005829(cytosol)	ko03010(Ribosome)	-	4	133-150	Y	153.182	141	7	7	2	0.999991	.\4_T_Plot\zjhD1\TRINITY_DN40430_c0_g5--141--blu-miR18-3p_degradome.jpg
blu-miR18-3p	TTTTTTCGAGCACGGATT	TRINITY_DN44177_c0_g5	hypothetical protein LR48_Vigan04g224400, partial [Vigna angularis]	GO:0000032(cell wall mannoprotein biosynthetic process);GO:0004169(dolichyl-phosphate-mannose-protein mannosyltransferase activity);GO:0007275(multicellular organism development);GO:0031502(dolichyl-phosphate-mannose-protein mannosyltransferase complex);GO:0044845(chain elongation of O-linked mannose residue);GO:1900101(regulation of endoplasmic reticulum unfolded protein response)	-	SDF2	4	97-113	Y	21.8832	104	1	1	4	0.999991	.\4_T_Plot\zjhD1\TRINITY_DN44177_c0_g5--104--blu-miR18-3p_degradome.jpg
blu-miR18-3p	TTTTTTCGAGCACGGATT	TRINITY_DN54356_c0_g10	PREDICTED: NK-tumor recognition protein [Juglans regia]	GO:0005634(nucleus)	-	-	3	183-201	Y	21.8832	192	1	1	4	0.869653	.\4_T_Plot\zjhD1\TRINITY_DN54356_c0_g10--192--blu-miR18-3p_degradome.jpg
blu-miR23-5p	TTGGGTTGAAAGGATCGGATC	TRINITY_DN51865_c0_g3	PREDICTED: DNA replication licensing factor MCM2 isoform X2 [Juglans regia]	GO:0006268(DNA unwinding involved in DNA replication)	ko03030(DNA replication)	OsI_36121	3.5	2497-2517	Y	21.8832	2508	1	1	4	0.701039	.\4_T_Plot\zjhD1\TRINITY_DN51865_c0_g3--2508--blu-miR23-5p_degradome.jpg
blu-miR2-5p	TCTTTTGCCTCTGTCAACATA	TRINITY_DN38327_c0_g2	PREDICTED: uncharacterized protein LOC109018725 [Juglans regia]	GO:0003674(molecular_function);GO:0008150(biological_process);GO:0009506(plasmodesma);GO:0016021(integral component of membrane)	-	Tmem205	4	783-803	Y	153.182	794	7	7	2	0.975123	.\4_T_Plot\zjhD1\TRINITY_DN38327_c0_g2--794--blu-miR2-5p_degradome.jpg
blu-miR2-5p	TCTTTTGCCTCTGTCAACATA	TRINITY_DN48416_c0_g1	-	-	-	-	3	728-748	Y	72.9439	739	6	3.33333	2	0.492601	.\4_T_Plot\zjhD1\TRINITY_DN48416_c0_g1--739--blu-miR2-5p_degradome.jpg
blu-miR2-5p	TCTTTTGCCTCTGTCAACATA	TRINITY_DN55534_c0_g2	PREDICTED: protein ENHANCED DISEASE RESISTANCE 2 [Jatropha curcas]	GO:0005634(nucleus);GO:0005829(cytosol);GO:0005886(plasma membrane);GO:0007165(signal transduction);GO:0008289(lipid binding);GO:0035091(phosphatidylinositol binding)	-	-	4	36-56	Y	109.416	47	5	5	2	0.975123	.\4_T_Plot\zjhD1\TRINITY_DN55534_c0_g2--47--blu-miR2-5p_degradome.jpg
blu-miR31-3p	TTTTCAAGGACCGGCTCCCCT	TRINITY_DN48365_c0_g1	PREDICTED: non-functional NADPH-dependent codeinone reductase 2-like isoform X1 [Juglans regia]	GO:0047036(codeinone reductase (NADPH) activity)	ko00040(Pentose and glucuronate interconversions);ko00051(Fructose and mannose metabolism);ko00052(Galactose metabolism);ko00561(Glycerolipid metabolism)	COR2	4	353-372	Y	87.5327	363	4	4	3	0.13134	.\4_T_Plot\zjhD1\TRINITY_DN48365_c0_g1--363--blu-miR31-3p_degradome.jpg
blu-miR3-3p	CATTCCATCATGGTCATCGTG	TRINITY_DN48616_c0_g1	-	-	-	-	4	395-416	Y	21.8832	406	1	1	4	0.652333	.\4_T_Plot\zjhD1\TRINITY_DN48616_c0_g1--406--blu-miR3-3p_degradome.jpg
blu-miR3-5p	CGATGACCATGATGGAATGCA	TRINITY_DN56202_c0_g7	hypothetical protein CICLE_v10014015mg [Citrus clementina]	GO:0000148(1,3-beta-D-glucan synthase complex);GO:0003843(1,3-beta-D-glucan synthase activity);GO:0005886(plasma membrane)	ko00500(Starch and sucrose metabolism)	CALS1	4	266-286	Y	43.7663	277	2	2	2	0.651939	.\4_T_Plot\zjhD1\TRINITY_DN56202_c0_g7--277--blu-miR3-5p_degradome.jpg
blu-miR4-3p	ATGAAATCAATTTGTCTCACC	TRINITY_DN48373_c0_g2	PREDICTED: probable ADP-ribosylation factor GTPase-activating protein AGD6 [Juglans regia]	GO:0003677(DNA binding);GO:0005096(GTPase activator activity);GO:0005634(nucleus);GO:0005829(cytosol);GO:0046872(metal ion binding)	ko04144(Endocytosis)	AGD6	4	1163-1183	Y	21.8832	1174	1	1	4	0.795005	.\4_T_Plot\zjhD1\TRINITY_DN48373_c0_g2--1174--blu-miR4-3p_degradome.jpg
blu-miR4-3p	ATGAAATCAATTTGTCTCACC	TRINITY_DN52056_c0_g5	PREDICTED: uncharacterized protein LOC109010875 [Juglans regia]	GO:0003674(molecular_function);GO:0005886(plasma membrane);GO:0008150(biological_process);GO:0016021(integral component of membrane)	-	-	3.5	49-69	Y	65.6495	60	3	3	2	0.836218	.\4_T_Plot\zjhD1\TRINITY_DN52056_c0_g5--60--blu-miR4-3p_degradome.jpg
blu-miR4-5p	TGAGACAAGATTGATTTCATTC	TRINITY_DN37335_c1_g3	-	-	-	-	3.5	482-503	Y	43.7663	494	2	2	2	0.700652	.\4_T_Plot\zjhD1\TRINITY_DN37335_c1_g3--494--blu-miR4-5p_degradome.jpg
blu-miR5-3p	CAACTTCATCTTTCATAAACC	TRINITY_DN46999_c0_g5	PREDICTED: calmodulin-binding transcription activator 2-like [Juglans regia]	GO:0001077(transcriptional activator activity, RNA polymerase II core promoter proximal region sequence-specific binding);GO:0005634(nucleus);GO:0043565(sequence-specific DNA binding);GO:0045944(positive regulation of transcription from RNA polymerase II promoter)	-	CMTA2	4	908-927	Y	21.8832	919	1	1	4	0.652333	.\4_T_Plot\zjhD1\TRINITY_DN46999_c0_g5--919--blu-miR5-3p_degradome.jpg
blu-miR6-5p	TAGGAGAGCACATCGAAGACT	TRINITY_DN46325_c2_g3	PREDICTED: coatomer subunit delta-like [Juglans regia]	GO:0005543(phospholipid binding);GO:0012505(endomembrane system);GO:0019898(extrinsic component of membrane)	ko03018(RNA dkoadation)	-	4	65-85	Y	21.8832	76	1	1	4	0.652333	.\4_T_Plot\zjhD1\TRINITY_DN46325_c2_g3--76--blu-miR6-5p_degradome.jpg
blu-miR7-3p	CATCTGTTCTCCTTCAAAATT	TRINITY_DN40480_c1_g2	PREDICTED: putative GEM-like protein 8 [Juglans regia]	GO:0003674(molecular_function);GO:0005575(cellular_component);GO:0008150(biological_process)	ko04141(Protein processing in endoplasmic reticulum);ko04120(Ubiquitin mediated proteolysis);ko03420(Nucleotide excision repair)	At5g08350	4	518-539	Y	21.8832	530	1	1	4	0.957977	.\4_T_Plot\zjhD1\TRINITY_DN40480_c1_g2--530--blu-miR7-3p_degradome.jpg
blu-miR7-3p	CATCTGTTCTCCTTCAAAATT	TRINITY_DN43643_c1_g6	Oligopeptide transporter 3 [Morus notabilis]	GO:0005737(cytoplasm);GO:0005886(plasma membrane);GO:0006857(oligopeptide transport);GO:0015031(protein transport);GO:0015198(oligopeptide transporter activity);GO:0016020(membrane);GO:0016021(integral component of membrane);GO:0055085(transmembrane transport)	-	OPT3	4	438-458	Y	21.8832	449	1	1	4	0.957977	.\4_T_Plot\zjhD1\TRINITY_DN43643_c1_g6--449--blu-miR7-3p_degradome.jpg
blu-miR8-3p	TTTGCAGACGCACTTGAATCG	TRINITY_DN51909_c0_g1	PREDICTED: F-box/kelch-repeat protein At3g23880-like, partial [Juglans regia]	-	-	-	3	140-160	Y	10.9416	151	1	0.5	4	0.93391	.\4_T_Plot\zjhD1\TRINITY_DN51909_c0_g1--151--blu-miR8-3p_degradome.jpg
blu-miR8-3p	TTTGCAGACGCACTTGAATCG	TRINITY_DN51595_c0_g1	PREDICTED: F-box/kelch-repeat protein At3g23880-like [Juglans regia]	GO:0004842(ubiquitin-protein transferase activity);GO:0019005(SCF ubiquitin ligase complex);GO:0031146(SCF-dependent proteasomal ubiquitin-dependent protein catabolic process)	ko00970(Aminoacyl-tRNA biosynthesis)	At3g07870	3	188-207	Y	21.8832	199	1	1	4	0.93391	.\4_T_Plot\zjhD1\TRINITY_DN51595_c0_g1--199--blu-miR8-3p_degradome.jpg
blu-miR8-3p	TTTGCAGACGCACTTGAATCG	TRINITY_DN55650_c0_g2	PREDICTED: F-box/kelch-repeat protein At3g23880-like, partial [Juglans regia]	GO:0004842(ubiquitin-protein transferase activity);GO:0019005(SCF ubiquitin ligase complex);GO:0031146(SCF-dependent proteasomal ubiquitin-dependent protein catabolic process)	-	-	1	161-181	Y	2811.99	172	129	128.5	0	0.00970167	.\4_T_Plot\zjhD1\TRINITY_DN55650_c0_g2--172--blu-miR8-3p_degradome.jpg
blu-miR8-3p	TTTGCAGACGCACTTGAATCG	TRINITY_DN57335_c1_g2	PREDICTED: F-box protein At3g07870-like isoform X1 [Nicotiana attenuata]	GO:0004842(ubiquitin-protein transferase activity);GO:0019005(SCF ubiquitin ligase complex);GO:0031146(SCF-dependent proteasomal ubiquitin-dependent protein catabolic process)	ko00970(Aminoacyl-tRNA biosynthesis)	At3g10240	2	211-231	Y	186.007	222	10	8.5	0	0.0244438	.\4_T_Plot\zjhD1\TRINITY_DN57335_c1_g2--222--blu-miR8-3p_degradome.jpg
blu-miR8-3p	TTTGCAGACGCACTTGAATCG	TRINITY_DN57335_c1_g1	unnamed protein product [Coffea canephora]	GO:0004842(ubiquitin-protein transferase activity);GO:0019005(SCF ubiquitin ligase complex);GO:0031146(SCF-dependent proteasomal ubiquitin-dependent protein catabolic process)	ko00970(Aminoacyl-tRNA biosynthesis)	At3g10240	2.5	65-85	Y	32.8248	76	3	1.5	2	0.529445	.\4_T_Plot\zjhD1\TRINITY_DN57335_c1_g1--76--blu-miR8-3p_degradome.jpg
blu-miR8-3p	TTTGCAGACGCACTTGAATCG	TRINITY_DN56908_c0_g1	PREDICTED: F-box/kelch-repeat protein At3g23880-like [Juglans regia]	GO:0004842(ubiquitin-protein transferase activity);GO:0019005(SCF ubiquitin ligase complex);GO:0031146(SCF-dependent proteasomal ubiquitin-dependent protein catabolic process)	ko00970(Aminoacyl-tRNA biosynthesis)	At1g52490	3	182-202	Y	21.8832	193	1	1	4	0.93391	.\4_T_Plot\zjhD1\TRINITY_DN56908_c0_g1--193--blu-miR8-3p_degradome.jpg
blu-miR8-5p	CAACATAGTTTTCTTCAGCTGT	TRINITY_DN51944_c1_g4	PREDICTED: uncharacterized protein LOC108981986 [Juglans regia]	-	-	-	2	1242-1263	Y	65.6495	1254	3	3	2	0.563613	.\4_T_Plot\zjhD1\TRINITY_DN51944_c1_g4--1254--blu-miR8-5p_degradome.jpg
miR1432a	TCAGGAAAGATGACACCGA	TRINITY_DN46361_c0_g3	hypothetical protein POPTR_0005s16700g [Populus trichocarpa]	GO:0003674(molecular_function);GO:0005774(vacuolar membrane);GO:0005783(endoplasmic reticulum);GO:0005794(Golgi apparatus);GO:0016021(integral component of membrane)	-	Ergic3	4	445-463	Y	43.7663	454	2	2	2	0.994892	.\4_T_Plot\zjhD1\TRINITY_DN46361_c0_g3--454--miR1432a_degradome.jpg
miR1432a	TCAGGAAAGATGACACCGA	TRINITY_DN48842_c0_g2	PREDICTED: vacuolar-sorting receptor 3-like [Juglans regia]	GO:0000139(Golgi membrane);GO:0005509(calcium ion binding);GO:0005768(endosome);GO:0005773(vacuole);GO:0005794(Golgi apparatus);GO:0005802(trans-Golgi network);GO:0005887(integral component of plasma membrane);GO:0006623(protein targeting to vacuole);GO:0016021(integral component of membrane);GO:0017119(Golgi transport complex);GO:0030665(clathrin-coated vesicle membrane);GO:0031902(late endosome…	-	BP80	3	2049-2066	Y	21.8832	2057	1	1	4	0.742921	.\4_T_Plot\zjhD1\TRINITY_DN48842_c0_g2--2057--miR1432a_degradome.jpg
miR1432a	TCAGGAAAGATGACACCGA	TRINITY_DN51895_c1_g4	peroxidase 5 [Betula platyphylla]	GO:0048831(regulation of shoot system development);GO:2000280(regulation of root development)	ko00590(Arachidonic acid metabolism);ko00480(Glutkoione metabolism)	CSA	3.5	96-114	Y	21.8832	105	1	1	4	0.951131	.\4_T_Plot\zjhD1\TRINITY_DN51895_c1_g4--105--miR1432a_degradome.jpg
miR156a	TGACAGAAGAGAGTGAGCAC	TRINITY_DN36962_c0_g1	promoter-binding protein SPL10 [Vitis vinifera]	GO:0003677(DNA binding);GO:0003700(transcription factor activity, sequence-specific DNA binding);GO:0005634(nucleus);GO:0006351(transcription, DNA-templated);GO:0006355(regulation of transcription, DNA-templated);GO:0044212(transcription regulatory region DNA binding);GO:0046872(metal ion binding);GO:0048510(regulation of timing of transition from vegetative to reproductive phase);GO:0048653(anth…	ko04075(Plant hormone signal transduction)	SPL12	1	1850-1869	Y	1356.76	1860	62	62	2	0.980158	.\4_T_Plot\zjhD1\TRINITY_DN36962_c0_g1--1860--miR156a_degradome.jpg
miR156a	TGACAGAAGAGAGTGAGCAC	TRINITY_DN45756_c0_g1	PREDICTED: teosinte glume architecture 1-like [Juglans regia]	GO:0003677(DNA binding);GO:0003700(transcription factor activity, sequence-specific DNA binding);GO:0005634(nucleus);GO:0006351(transcription, DNA-templated);GO:0006355(regulation of transcription, DNA-templated);GO:0046872(metal ion binding);GO:0048653(anther development)	-	TGA1	3	990-1009	Y	21.8832	1000	1	1	4	0.869653	.\4_T_Plot\zjhD1\TRINITY_DN45756_c0_g1--1000--miR156a_degradome.jpg
miR156a	TGACAGAAGAGAGTGAGCAC	TRINITY_DN46003_c0_g2	endo-1,4-beta-glucanase 1 [Betula luminifera]	GO:0004553(hydrolase activity, hydrolyzing O-glycosyl compounds);GO:0005768(endosome);GO:0005769(early endosome);GO:0005794(Golgi apparatus);GO:0005802(trans-Golgi network);GO:0005886(plasma membrane);GO:0008810(cellulase activity);GO:0009504(cell plate);GO:0009735(response to cytokinin);GO:0009826(unidimensional cell growth);GO:0016021(integral component of membrane);GO:0030244(cellulose biosynt…	ko00500(Starch and sucrose metabolism)	KOR	3.5	2046-2065	Y	525.196	2056	24	24	2	0.452873	.\4_T_Plot\zjhD1\TRINITY_DN46003_c0_g2--2056--miR156a_degradome.jpg
miR156a	TGACAGAAGAGAGTGAGCAC	TRINITY_DN49045_c0_g3	PREDICTED: teosinte glume architecture 1-like [Juglans regia]	GO:0003677(DNA binding);GO:0003700(transcription factor activity, sequence-specific DNA binding);GO:0005634(nucleus);GO:0006351(transcription, DNA-templated);GO:0006355(regulation of transcription, DNA-templated);GO:0046872(metal ion binding);GO:0048653(anther development)	-	SPL13A	1	1322-1341	Y	21.8832	1332	1	1	4	0.980242	.\4_T_Plot\zjhD1\TRINITY_DN49045_c0_g3--1332--miR156a_degradome.jpg
miR156a	TGACAGAAGAGAGTGAGCAC	TRINITY_DN49210_c1_g2	PREDICTED: squamosa promoter-binding-like protein 3 [Juglans regia]	GO:0003677(DNA binding);GO:0003700(transcription factor activity, sequence-specific DNA binding);GO:0005634(nucleus);GO:0005737(cytoplasm);GO:0006351(transcription, DNA-templated);GO:0006355(regulation of transcription, DNA-templated);GO:0009908(flower development);GO:0010321(regulation of vegetative phase change);GO:0046872(metal ion binding)	ko04075(Plant hormone signal transduction)	SPL4	3	580-599	Y	21.8832	590	1	1	4	0.869653	.\4_T_Plot\zjhD1\TRINITY_DN49210_c1_g2--590--miR156a_degradome.jpg
miR156a	TGACAGAAGAGAGTGAGCAC	TRINITY_DN56225_c0_g1	-	-	-	-	4	329-347	Y	207.89	339	19	9.5	2	0.985324	.\4_T_Plot\zjhD1\TRINITY_DN56225_c0_g1--339--miR156a_degradome.jpg
miR156a-3p	TGCTCACTTCTCTTTCTGTCAGC	TRINITY_DN39455_c0_g3	PREDICTED: uncharacterized protein LOC108997870 [Juglans regia]	-	-	-	4	64-87	Y	43.7663	78	2	2	2	0.410033	.\4_T_Plot\zjhD1\TRINITY_DN39455_c0_g3--78--miR156a-3p_degradome.jpg
miR156b	TGACAGAAGAGAGTGAGCAC	TRINITY_DN36962_c0_g1	promoter-binding protein SPL10 [Vitis vinifera]	GO:0003677(DNA binding);GO:0003700(transcription factor activity, sequence-specific DNA binding);GO:0005634(nucleus);GO:0006351(transcription, DNA-templated);GO:0006355(regulation of transcription, DNA-templated);GO:0044212(transcription regulatory region DNA binding);GO:0046872(metal ion binding);GO:0048510(regulation of timing of transition from vegetative to reproductive phase);GO:0048653(anth…	ko04075(Plant hormone signal transduction)	SPL12	1	1850-1869	Y	1356.76	1860	62	62	2	0.980158	.\4_T_Plot\zjhD1\TRINITY_DN36962_c0_g1--1860--miR156b_degradome.jpg
miR156b	TGACAGAAGAGAGTGAGCAC	TRINITY_DN45756_c0_g1	PREDICTED: teosinte glume architecture 1-like [Juglans regia]	GO:0003677(DNA binding);GO:0003700(transcription factor activity, sequence-specific DNA binding);GO:0005634(nucleus);GO:0006351(transcription, DNA-templated);GO:0006355(regulation of transcription, DNA-templated);GO:0046872(metal ion binding);GO:0048653(anther development)	-	TGA1	3	990-1009	Y	21.8832	1000	1	1	4	0.869653	.\4_T_Plot\zjhD1\TRINITY_DN45756_c0_g1--1000--miR156b_degradome.jpg
miR156b	TGACAGAAGAGAGTGAGCAC	TRINITY_DN46003_c0_g2	endo-1,4-beta-glucanase 1 [Betula luminifera]	GO:0004553(hydrolase activity, hydrolyzing O-glycosyl compounds);GO:0005768(endosome);GO:0005769(early endosome);GO:0005794(Golgi apparatus);GO:0005802(trans-Golgi network);GO:0005886(plasma membrane);GO:0008810(cellulase activity);GO:0009504(cell plate);GO:0009735(response to cytokinin);GO:0009826(unidimensional cell growth);GO:0016021(integral component of membrane);GO:0030244(cellulose biosynt…	ko00500(Starch and sucrose metabolism)	KOR	3.5	2046-2065	Y	525.196	2056	24	24	2	0.452873	.\4_T_Plot\zjhD1\TRINITY_DN46003_c0_g2--2056--miR156b_degradome.jpg
miR156b	TGACAGAAGAGAGTGAGCAC	TRINITY_DN49045_c0_g3	PREDICTED: teosinte glume architecture 1-like [Juglans regia]	GO:0003677(DNA binding);GO:0003700(transcription factor activity, sequence-specific DNA binding);GO:0005634(nucleus);GO:0006351(transcription, DNA-templated);GO:0006355(regulation of transcription, DNA-templated);GO:0046872(metal ion binding);GO:0048653(anther development)	-	SPL13A	1	1322-1341	Y	21.8832	1332	1	1	4	0.980242	.\4_T_Plot\zjhD1\TRINITY_DN49045_c0_g3--1332--miR156b_degradome.jpg
miR156b	TGACAGAAGAGAGTGAGCAC	TRINITY_DN49210_c1_g2	PREDICTED: squamosa promoter-binding-like protein 3 [Juglans regia]	GO:0003677(DNA binding);GO:0003700(transcription factor activity, sequence-specific DNA binding);GO:0005634(nucleus);GO:0005737(cytoplasm);GO:0006351(transcription, DNA-templated);GO:0006355(regulation of transcription, DNA-templated);GO:0009908(flower development);GO:0010321(regulation of vegetative phase change);GO:0046872(metal ion binding)	ko04075(Plant hormone signal transduction)	SPL4	3	580-599	Y	21.8832	590	1	1	4	0.869653	.\4_T_Plot\zjhD1\TRINITY_DN49210_c1_g2--590--miR156b_degradome.jpg
miR156b	TGACAGAAGAGAGTGAGCAC	TRINITY_DN56225_c0_g1	-	-	-	-	4	329-347	Y	207.89	339	19	9.5	2	0.985324	.\4_T_Plot\zjhD1\TRINITY_DN56225_c0_g1--339--miR156b_degradome.jpg
miR156c	TGACAGAAGAGAGTGAGCAC	TRINITY_DN36962_c0_g1	promoter-binding protein SPL10 [Vitis vinifera]	GO:0003677(DNA binding);GO:0003700(transcription factor activity, sequence-specific DNA binding);GO:0005634(nucleus);GO:0006351(transcription, DNA-templated);GO:0006355(regulation of transcription, DNA-templated);GO:0044212(transcription regulatory region DNA binding);GO:0046872(metal ion binding);GO:0048510(regulation of timing of transition from vegetative to reproductive phase);GO:0048653(anth…	ko04075(Plant hormone signal transduction)	SPL12	1	1850-1869	Y	1356.76	1860	62	62	2	0.980158	.\4_T_Plot\zjhD1\TRINITY_DN36962_c0_g1--1860--miR156c_degradome.jpg
miR156c	TGACAGAAGAGAGTGAGCAC	TRINITY_DN45756_c0_g1	PREDICTED: teosinte glume architecture 1-like [Juglans regia]	GO:0003677(DNA binding);GO:0003700(transcription factor activity, sequence-specific DNA binding);GO:0005634(nucleus);GO:0006351(transcription, DNA-templated);GO:0006355(regulation of transcription, DNA-templated);GO:0046872(metal ion binding);GO:0048653(anther development)	-	TGA1	3	990-1009	Y	21.8832	1000	1	1	4	0.869653	.\4_T_Plot\zjhD1\TRINITY_DN45756_c0_g1--1000--miR156c_degradome.jpg
miR156c	TGACAGAAGAGAGTGAGCAC	TRINITY_DN46003_c0_g2	endo-1,4-beta-glucanase 1 [Betula luminifera]	GO:0004553(hydrolase activity, hydrolyzing O-glycosyl compounds);GO:0005768(endosome);GO:0005769(early endosome);GO:0005794(Golgi apparatus);GO:0005802(trans-Golgi network);GO:0005886(plasma membrane);GO:0008810(cellulase activity);GO:0009504(cell plate);GO:0009735(response to cytokinin);GO:0009826(unidimensional cell growth);GO:0016021(integral component of membrane);GO:0030244(cellulose biosynt…	ko00500(Starch and sucrose metabolism)	KOR	3.5	2046-2065	Y	525.196	2056	24	24	2	0.452873	.\4_T_Plot\zjhD1\TRINITY_DN46003_c0_g2--2056--miR156c_degradome.jpg
miR156c	TGACAGAAGAGAGTGAGCAC	TRINITY_DN49045_c0_g3	PREDICTED: teosinte glume architecture 1-like [Juglans regia]	GO:0003677(DNA binding);GO:0003700(transcription factor activity, sequence-specific DNA binding);GO:0005634(nucleus);GO:0006351(transcription, DNA-templated);GO:0006355(regulation of transcription, DNA-templated);GO:0046872(metal ion binding);GO:0048653(anther development)	-	SPL13A	1	1322-1341	Y	21.8832	1332	1	1	4	0.980242	.\4_T_Plot\zjhD1\TRINITY_DN49045_c0_g3--1332--miR156c_degradome.jpg
miR156c	TGACAGAAGAGAGTGAGCAC	TRINITY_DN49210_c1_g2	PREDICTED: squamosa promoter-binding-like protein 3 [Juglans regia]	GO:0003677(DNA binding);GO:0003700(transcription factor activity, sequence-specific DNA binding);GO:0005634(nucleus);GO:0005737(cytoplasm);GO:0006351(transcription, DNA-templated);GO:0006355(regulation of transcription, DNA-templated);GO:0009908(flower development);GO:0010321(regulation of vegetative phase change);GO:0046872(metal ion binding)	ko04075(Plant hormone signal transduction)	SPL4	3	580-599	Y	21.8832	590	1	1	4	0.869653	.\4_T_Plot\zjhD1\TRINITY_DN49210_c1_g2--590--miR156c_degradome.jpg
miR156c	TGACAGAAGAGAGTGAGCAC	TRINITY_DN56225_c0_g1	-	-	-	-	4	329-347	Y	207.89	339	19	9.5	2	0.985324	.\4_T_Plot\zjhD1\TRINITY_DN56225_c0_g1--339--miR156c_degradome.jpg
miR156c-3p	TGCTCACTTCTCTTTCTGTCAGC	TRINITY_DN39455_c0_g3	PREDICTED: uncharacterized protein LOC108997870 [Juglans regia]	-	-	-	4	64-87	Y	43.7663	78	2	2	2	0.410033	.\4_T_Plot\zjhD1\TRINITY_DN39455_c0_g3--78--miR156c-3p_degradome.jpg
miR156d	TTGACAGAAGAGAGAGAGCAC	TRINITY_DN36962_c0_g1	promoter-binding protein SPL10 [Vitis vinifera]	GO:0003677(DNA binding);GO:0003700(transcription factor activity, sequence-specific DNA binding);GO:0005634(nucleus);GO:0006351(transcription, DNA-templated);GO:0006355(regulation of transcription, DNA-templated);GO:0044212(transcription regulatory region DNA binding);GO:0046872(metal ion binding);GO:0048510(regulation of timing of transition from vegetative to reproductive phase);GO:0048653(anth…	ko04075(Plant hormone signal transduction)	SPL12	0	1850-1870	Y	3895.2	1861	178	178	0	0.0222466	.\4_T_Plot\zjhD1\TRINITY_DN36962_c0_g1--1861--miR156d_degradome.jpg
miR156d	TTGACAGAAGAGAGAGAGCAC	TRINITY_DN37377_c2_g5	SBP-box transcription factor [Betula luminifera]	GO:0003677(DNA binding);GO:0003700(transcription factor activity, sequence-specific DNA binding);GO:0005634(nucleus);GO:0006351(transcription, DNA-templated);GO:0006355(regulation of transcription, DNA-templated);GO:0046872(metal ion binding);GO:0048653(anther development)	-	SPL13A	1	111-131	Y	21.8832	122	1	1	4	0.980242	.\4_T_Plot\zjhD1\TRINITY_DN37377_c2_g5--122--miR156d_degradome.jpg
miR156d	TTGACAGAAGAGAGAGAGCAC	TRINITY_DN45756_c0_g1	PREDICTED: teosinte glume architecture 1-like [Juglans regia]	GO:0003677(DNA binding);GO:0003700(transcription factor activity, sequence-specific DNA binding);GO:0005634(nucleus);GO:0006351(transcription, DNA-templated);GO:0006355(regulation of transcription, DNA-templated);GO:0046872(metal ion binding);GO:0048653(anther development)	-	TGA1	3	990-1010	Y	21.8832	1001	1	1	4	0.93391	.\4_T_Plot\zjhD1\TRINITY_DN45756_c0_g1--1001--miR156d_degradome.jpg
miR156d	TTGACAGAAGAGAGAGAGCAC	TRINITY_DN46003_c0_g2	endo-1,4-beta-glucanase 1 [Betula luminifera]	GO:0004553(hydrolase activity, hydrolyzing O-glycosyl compounds);GO:0005768(endosome);GO:0005769(early endosome);GO:0005794(Golgi apparatus);GO:0005802(trans-Golgi network);GO:0005886(plasma membrane);GO:0008810(cellulase activity);GO:0009504(cell plate);GO:0009735(response to cytokinin);GO:0009826(unidimensional cell growth);GO:0016021(integral component of membrane);GO:0030244(cellulose biosynt…	ko00500(Starch and sucrose metabolism)	KOR	3.5	2046-2066	Y	415.78	2057	19	19	2	0.452873	.\4_T_Plot\zjhD1\TRINITY_DN46003_c0_g2--2057--miR156d_degradome.jpg
miR156d	TTGACAGAAGAGAGAGAGCAC	TRINITY_DN54675_c1_g2	PREDICTED: squamosa promoter-binding-like protein 9 isoform X1 [Juglans regia]	GO:0003677(DNA binding);GO:0003700(transcription factor activity, sequence-specific DNA binding);GO:0005634(nucleus);GO:0005737(cytoplasm);GO:0006351(transcription, DNA-templated);GO:0006355(regulation of transcription, DNA-templated);GO:0010228(vegetative to reproductive phase transition of meristem);GO:0046872(metal ion binding);GO:0048366(leaf development);GO:0048653(anther development);GO:200…	-	SPL14	0	487-507	Y	21.8832	498	1	1	4	0.896061	.\4_T_Plot\zjhD1\TRINITY_DN54675_c1_g2--498--miR156d_degradome.jpg
miR156d-3p	GCTTTCTCTTCTTCTGTCACC	TRINITY_DN35855_c0_g1	PREDICTED: inactive beta-amylase 9 [Juglans regia]	GO:0000272(polysaccharide catabolic process);GO:0005737(cytoplasm);GO:0009507(chloroplast);GO:0016161(beta-amylase activity)	ko00500(Starch and sucrose metabolism)	BAM9	4	1146-1166	Y	21.8832	1157	1	1	4	1	.\4_T_Plot\zjhD1\TRINITY_DN35855_c0_g1--1157--miR156d-3p_degradome.jpg
miR156d-3p	GCTTTCTCTTCTTCTGTCACC	TRINITY_DN37894_c0_g5	PREDICTED: uncharacterized protein LOC108998739 [Juglans regia]	GO:0005634(nucleus);GO:0005886(plasma membrane);GO:0008565(protein transporter activity);GO:0015031(protein transport);GO:0016020(membrane);GO:0016021(integral component of membrane)	ko03060(Protein export);ko04141(Protein processing in endoplasmic reticulum)	-	4	1075-1096	Y	21.8832	1086	1	1	4	1	.\4_T_Plot\zjhD1\TRINITY_DN37894_c0_g5--1086--miR156d-3p_degradome.jpg
miR156d-3p	GCTTTCTCTTCTTCTGTCACC	TRINITY_DN39584_c2_g4	hypothetical protein MANES_02G043300 [Manihot esculenta]	GO:0003723(RNA binding);GO:0003729(mRNA binding);GO:0005634(nucleus);GO:0005737(cytoplasm);GO:0048471(perinuclear region of cytoplasm);GO:0071470(cellular response to osmotic stress);GO:0071472(cellular response to salt stress)	-	RGGA	2	320-339	Y	43.7663	330	2	2	3	0.198494	.\4_T_Plot\zjhD1\TRINITY_DN39584_c2_g4--330--miR156d-3p_degradome.jpg
miR156d-3p	GCTTTCTCTTCTTCTGTCACC	TRINITY_DN38895_c0_g3	PREDICTED: UDP-galactose/UDP-glucose transporter 3 [Theobroma cacao]	GO:0005459(UDP-galactose transmembrane transporter activity);GO:0030173(integral component of Golgi membrane);GO:0030176(integral component of endoplasmic reticulum membrane);GO:0072334(UDP-galactose transmembrane transport)	-	UTR3	2.5	1257-1277	Y	131.299	1268	6	6	2	0.895809	.\4_T_Plot\zjhD1\TRINITY_DN38895_c0_g3--1268--miR156d-3p_degradome.jpg
miR156d-3p	GCTTTCTCTTCTTCTGTCACC	TRINITY_DN39828_c1_g5	PREDICTED: protein TIC110, chloroplastic isoform X1 [Juglans regia]	GO:0005515(protein binding);GO:0009507(chloroplast);GO:0009536(plastid);GO:0009658(chloroplast organization);GO:0009941(chloroplast envelope);GO:0016020(membrane);GO:0016021(integral component of membrane);GO:0031897(Tic complex);GO:0045037(protein import into chloroplast stroma)	-	TIC110	3.5	1838-1857	Y	43.7663	1848	2	2	2	0.995607	.\4_T_Plot\zjhD1\TRINITY_DN39828_c1_g5--1848--miR156d-3p_degradome.jpg
miR156d-3p	GCTTTCTCTTCTTCTGTCACC	TRINITY_DN39789_c0_g9	PREDICTED: histone acetyltransferase KAT6A-like [Juglans regia]	GO:0003674(molecular_function);GO:0005634(nucleus);GO:0009507(chloroplast);GO:0010207(photosystem II assembly)	-	-	4	672-692	Y	109.416	683	5	5	2	1	.\4_T_Plot\zjhD1\TRINITY_DN39789_c0_g9--683--miR156d-3p_degradome.jpg
miR156d-3p	GCTTTCTCTTCTTCTGTCACC	TRINITY_DN40868_c1_g1	PREDICTED: uncharacterized protein LOC108999561 [Juglans regia]	GO:0003674(molecular_function);GO:0005634(nucleus);GO:0008150(biological_process)	-	-	4	1022-1041	Y	43.7663	1032	2	2	2	1	.\4_T_Plot\zjhD1\TRINITY_DN40868_c1_g1--1032--miR156d-3p_degradome.jpg
miR156d-3p	GCTTTCTCTTCTTCTGTCACC	TRINITY_DN39289_c1_g4	hypothetical protein PRUPE_ppa012279mg [Prunus persica]	-	-	-	4	328-347	Y	87.5327	338	4	4	3	0.920696	.\4_T_Plot\zjhD1\TRINITY_DN39289_c1_g4--338--miR156d-3p_degradome.jpg
miR156d-3p	GCTTTCTCTTCTTCTGTCACC	TRINITY_DN40102_c2_g1	PREDICTED: uncharacterized protein LOC109010261 [Juglans regia]	GO:0003674(molecular_function);GO:0005634(nucleus);GO:0008150(biological_process)	-	-	4	71-90	Y	21.8832	81	1	1	4	1	.\4_T_Plot\zjhD1\TRINITY_DN40102_c2_g1--81--miR156d-3p_degradome.jpg
miR156d-3p	GCTTTCTCTTCTTCTGTCACC	TRINITY_DN41766_c1_g5	PREDICTED: NF-kappa-B-activating protein [Juglans regia]	GO:0003674(molecular_function);GO:0005634(nucleus);GO:0005731(nucleolus organizer region);GO:0008150(biological_process);GO:0044030(regulation of DNA methylation);GO:2000232(regulation of rRNA processing)	-	-	3.5	442-462	Y	65.6495	453	3	3	3	0.515255	.\4_T_Plot\zjhD1\TRINITY_DN41766_c1_g5--453--miR156d-3p_degradome.jpg
miR156d-3p	GCTTTCTCTTCTTCTGTCACC	TRINITY_DN42783_c0_g3	PREDICTED: hsp70-Hsp90 organizing protein 3-like [Juglans regia]	GO:0005634(nucleus);GO:0005737(cytoplasm);GO:0005829(cytosol);GO:0005886(plasma membrane);GO:0046686(response to cadmium ion)	-	HOP2	4	879-899	Y	109.416	890	5	5	2	1	.\4_T_Plot\zjhD1\TRINITY_DN42783_c0_g3--890--miR156d-3p_degradome.jpg
miR156d-3p	GCTTTCTCTTCTTCTGTCACC	TRINITY_DN41386_c0_g1	ethylene response factor protein 1 [Betula platyphylla]	GO:0003677(DNA binding);GO:0003700(transcription factor activity, sequence-specific DNA binding);GO:0005515(protein binding);GO:0005634(nucleus);GO:0005737(cytoplasm);GO:0005886(plasma membrane);GO:0006351(transcription, DNA-templated);GO:0006355(regulation of transcription, DNA-templated);GO:0008219(cell death);GO:0009723(response to ethylene);GO:0009735(response to cytokinin);GO:0009753(respons…	ko04626(Plant-pkogen interaction)	RAP2-3	4	802-822	Y	21.8832	813	1	1	4	1	.\4_T_Plot\zjhD1\TRINITY_DN41386_c0_g1--813--miR156d-3p_degradome.jpg
miR156d-3p	GCTTTCTCTTCTTCTGTCACC	TRINITY_DN42028_c2_g2	PREDICTED: 3-epi-6-deoxocathasterone 23-monooxygenase isoform X2 [Juglans regia]	GO:0007275(multicellular organism development);GO:0008395(steroid hydroxylase activity);GO:0010268(brassinosteroid homeostasis);GO:0016125(sterol metabolic process);GO:0016132(brassinosteroid biosynthetic process);GO:0016709(oxidoreductase activity, acting on paired donors, with incorporation or reduction of molecular oxygen, NAD(P)H as one donor, and incorporation of one atom of oxygen)	ko00905(Brassinosteroid biosynthesis)	ROT3	4	1554-1573	Y	590.846	1564	27	27	0	0.172198	.\4_T_Plot\zjhD1\TRINITY_DN42028_c2_g2--1564--miR156d-3p_degradome.jpg
miR156d-3p	GCTTTCTCTTCTTCTGTCACC	TRINITY_DN45949_c2_g2	PREDICTED: uncharacterized protein LOC109014285 [Juglans regia]	-	-	-	4	261-281	Y	87.5327	272	4	4	2	1	.\4_T_Plot\zjhD1\TRINITY_DN45949_c2_g2--272--miR156d-3p_degradome.jpg
miR156d-3p	GCTTTCTCTTCTTCTGTCACC	TRINITY_DN45072_c0_g2	PREDICTED: uncharacterized protein LOC109000770 [Juglans regia]	-	-	-	4	413-432	Y	43.7663	423	2	2	2	1	.\4_T_Plot\zjhD1\TRINITY_DN45072_c0_g2--423--miR156d-3p_degradome.jpg
miR156d-3p	GCTTTCTCTTCTTCTGTCACC	TRINITY_DN46324_c0_g5	PREDICTED: trihelix transcription factor GT-2-like [Juglans regia]	GO:0003700(transcription factor activity, sequence-specific DNA binding);GO:0005634(nucleus);GO:0006355(regulation of transcription, DNA-templated);GO:0010192(mucilage biosynthetic process);GO:0044212(transcription regulatory region DNA binding)	-	GT-2	4	634-654	Y	43.7663	645	2	2	2	1	.\4_T_Plot\zjhD1\TRINITY_DN46324_c0_g5--645--miR156d-3p_degradome.jpg
miR156d-3p	GCTTTCTCTTCTTCTGTCACC	TRINITY_DN48529_c0_g1	PREDICTED: apoptosis-inducing factor homolog B-like [Juglans regia]	GO:0005737(cytoplasm);GO:0005794(Golgi apparatus);GO:0009055(electron carrier activity);GO:0016491(oxidoreductase activity);GO:0055114(oxidation-reduction process)	-	aifB	3.5	1073-1094	Y	43.7663	1085	2	2	2	0.995607	.\4_T_Plot\zjhD1\TRINITY_DN48529_c0_g1--1085--miR156d-3p_degradome.jpg
miR156d-3p	GCTTTCTCTTCTTCTGTCACC	TRINITY_DN51951_c0_g1	PREDICTED: uncharacterized protein LOC109017170, partial [Juglans regia]	GO:0003676(nucleic acid binding);GO:0004518(nuclease activity);GO:0004523(RNA-DNA hybrid ribonuclease activity);GO:0005737(cytoplasm);GO:0016740(transferase activity)	-	-	4	560-580	Y	65.6495	571	3	3	1	0.0563414	.\4_T_Plot\zjhD1\TRINITY_DN51951_c0_g1--571--miR156d-3p_degradome.jpg
miR156d-3p	GCTTTCTCTTCTTCTGTCACC	TRINITY_DN53498_c0_g1	PREDICTED: auxin-responsive protein IAA6-like [Juglans regia]	GO:0003700(transcription factor activity, sequence-specific DNA binding);GO:0005634(nucleus);GO:0006351(transcription, DNA-templated);GO:0006355(regulation of transcription, DNA-templated);GO:0009733(response to auxin);GO:0009734(auxin-activated signaling pathway)	ko04075(Plant hormone signal transduction)	IAA26	3.5	301-321	Y	153.182	312	7	7	2	0.995607	.\4_T_Plot\zjhD1\TRINITY_DN53498_c0_g1--312--miR156d-3p_degradome.jpg
miR156d-3p	GCTTTCTCTTCTTCTGTCACC	TRINITY_DN53065_c0_g9	PREDICTED: eukaryotic translation initiation factor 5B-like, partial [Juglans regia]	-	ko03013(RNA transport)	-	3.5	205-224	Y	328.248	215	15	15	2	0.995607	.\4_T_Plot\zjhD1\TRINITY_DN53065_c0_g9--215--miR156d-3p_degradome.jpg
miR156d-3p	GCTTTCTCTTCTTCTGTCACC	TRINITY_DN55993_c1_g9	PREDICTED: F-box protein At3g07870-like [Juglans regia]	GO:0003674(molecular_function);GO:0005634(nucleus);GO:0008150(biological_process);GO:0009506(plasmodesma)	ko00970(Aminoacyl-tRNA biosynthesis)	At3g07870	3	148-169	Y	21.8832	160	1	1	4	0.995632	.\4_T_Plot\zjhD1\TRINITY_DN55993_c1_g9--160--miR156d-3p_degradome.jpg
miR156d-3p	GCTTTCTCTTCTTCTGTCACC	TRINITY_DN55856_c0_g4	PREDICTED: dnaJ homolog subfamily C member 2 [Juglans regia]	GO:0003677(DNA binding);GO:0003700(transcription factor activity, sequence-specific DNA binding);GO:0005634(nucleus);GO:0005783(endoplasmic reticulum);GO:0005886(plasma membrane);GO:0016021(integral component of membrane);GO:0048767(root hair elongation)	-	dnajc2	4	14-33	Y	262.598	24	12	12	2	1	.\4_T_Plot\zjhD1\TRINITY_DN55856_c0_g4--24--miR156d-3p_degradome.jpg
miR156e	TTGACAGAAGATAGAGAGCAC	TRINITY_DN36962_c0_g1	promoter-binding protein SPL10 [Vitis vinifera]	GO:0003677(DNA binding);GO:0003700(transcription factor activity, sequence-specific DNA binding);GO:0005634(nucleus);GO:0006351(transcription, DNA-templated);GO:0006355(regulation of transcription, DNA-templated);GO:0044212(transcription regulatory region DNA binding);GO:0046872(metal ion binding);GO:0048510(regulation of timing of transition from vegetative to reproductive phase);GO:0048653(anth…	ko04075(Plant hormone signal transduction)	SPL12	2	1850-1870	Y	3895.2	1861	178	178	0	0.016363	.\4_T_Plot\zjhD1\TRINITY_DN36962_c0_g1--1861--miR156e_degradome.jpg
miR156e	TTGACAGAAGATAGAGAGCAC	TRINITY_DN37377_c2_g5	SBP-box transcription factor [Betula luminifera]	GO:0003677(DNA binding);GO:0003700(transcription factor activity, sequence-specific DNA binding);GO:0005634(nucleus);GO:0006351(transcription, DNA-templated);GO:0006355(regulation of transcription, DNA-templated);GO:0046872(metal ion binding);GO:0048653(anther development)	-	SPL13A	3	111-131	Y	21.8832	122	1	1	4	0.966491	.\4_T_Plot\zjhD1\TRINITY_DN37377_c2_g5--122--miR156e_degradome.jpg
miR156e	TTGACAGAAGATAGAGAGCAC	TRINITY_DN39454_c0_g1	PREDICTED: uncharacterized protein LOC109005000 isoform X1 [Juglans regia]	GO:0003677(DNA binding);GO:0005634(nucleus);GO:0008150(biological_process);GO:0046983(protein dimerization activity)	ko02010(ABC transporters)	-	4	332-352	Y	43.7663	343	2	2	1	0.00802193	.\4_T_Plot\zjhD1\TRINITY_DN39454_c0_g1--343--miR156e_degradome.jpg
miR156e	TTGACAGAAGATAGAGAGCAC	TRINITY_DN45756_c0_g1	PREDICTED: teosinte glume architecture 1-like [Juglans regia]	GO:0003677(DNA binding);GO:0003700(transcription factor activity, sequence-specific DNA binding);GO:0005634(nucleus);GO:0006351(transcription, DNA-templated);GO:0006355(regulation of transcription, DNA-templated);GO:0046872(metal ion binding);GO:0048653(anther development)	-	TGA1	1	990-1010	Y	21.8832	1001	1	1	4	0.625081	.\4_T_Plot\zjhD1\TRINITY_DN45756_c0_g1--1001--miR156e_degradome.jpg
miR156e	TTGACAGAAGATAGAGAGCAC	TRINITY_DN54675_c1_g2	PREDICTED: squamosa promoter-binding-like protein 9 isoform X1 [Juglans regia]	GO:0003677(DNA binding);GO:0003700(transcription factor activity, sequence-specific DNA binding);GO:0005634(nucleus);GO:0005737(cytoplasm);GO:0006351(transcription, DNA-templated);GO:0006355(regulation of transcription, DNA-templated);GO:0010228(vegetative to reproductive phase transition of meristem);GO:0046872(metal ion binding);GO:0048366(leaf development);GO:0048653(anther development);GO:200…	-	SPL14	2	487-507	Y	21.8832	498	1	1	4	0.809905	.\4_T_Plot\zjhD1\TRINITY_DN54675_c1_g2--498--miR156e_degradome.jpg
miR156e	TTGACAGAAGATAGAGAGCAC	TRINITY_DN53506_c0_g1	PREDICTED: putative F-box protein At1g65770 [Juglans regia]	GO:0003677(DNA binding);GO:0005634(nucleus);GO:0005694(chromosome);GO:0005737(cytoplasm);GO:0006260(DNA replication);GO:0006284(base-excision repair);GO:0006302(double-strand break repair);GO:0006310(DNA recombination);GO:0009378(four-way junction helicase activity);GO:0032508(DNA duplex unwinding);GO:0043140(ATP-dependent 3'-5' DNA helicase activity)	-	SKIP23	4	229-248	Y	43.7663	240	2	2	2	0.928528	.\4_T_Plot\zjhD1\TRINITY_DN53506_c0_g1--240--miR156e_degradome.jpg
miR156e-3p	GCTCTCTATGCTTCTGTCATC	TRINITY_DN41108_c0_g1	PREDICTED: putative clathrin assembly protein At2g01600 isoform X1 [Juglans regia]	GO:0005545(1-phosphatidylinositol binding);GO:0005794(Golgi apparatus);GO:0005886(plasma membrane);GO:0005905(clathrin-coated pit);GO:0006897(endocytosis);GO:0016020(membrane);GO:0030136(clathrin-coated vesicle);GO:0030276(clathrin binding);GO:0048268(clathrin coat assembly)	-	At2g01600	4	310-329	Y	109.416	320	5	5	2	0.957834	.\4_T_Plot\zjhD1\TRINITY_DN41108_c0_g1--320--miR156e-3p_degradome.jpg
miR156f	TCTCTTTTCTTCTGTCAATAGA	TRINITY_DN45976_c0_g1	-	-	-	-	3.5	556-576	Y	21.8832	567	1	1	4	0.910622	.\4_T_Plot\zjhD1\TRINITY_DN45976_c0_g1--567--miR156f_degradome.jpg
miR156f	TCTCTTTTCTTCTGTCAATAGA	TRINITY_DN49505_c0_g2	PREDICTED: transcription repressor KAN1-like [Juglans regia]	GO:0005634(nucleus);GO:0006355(regulation of transcription, DNA-templated);GO:0044212(transcription regulatory region DNA binding)	ko03040(Spliceosome)	KAN1	3.5	51-71	Y	175.065	62	8	8	2	0.910391	.\4_T_Plot\zjhD1\TRINITY_DN49505_c0_g2--62--miR156f_degradome.jpg
miR156g	TGACAGAAGAGAGTGAGCACT	TRINITY_DN36962_c0_g1	promoter-binding protein SPL10 [Vitis vinifera]	GO:0003677(DNA binding);GO:0003700(transcription factor activity, sequence-specific DNA binding);GO:0005634(nucleus);GO:0006351(transcription, DNA-templated);GO:0006355(regulation of transcription, DNA-templated);GO:0044212(transcription regulatory region DNA binding);GO:0046872(metal ion binding);GO:0048510(regulation of timing of transition from vegetative to reproductive phase);GO:0048653(anth…	ko04075(Plant hormone signal transduction)	SPL12	2	1849-1869	Y	1356.76	1860	62	62	2	0.984174	.\4_T_Plot\zjhD1\TRINITY_DN36962_c0_g1--1860--miR156g_degradome.jpg
miR156g	TGACAGAAGAGAGTGAGCACT	TRINITY_DN45756_c0_g1	PREDICTED: teosinte glume architecture 1-like [Juglans regia]	GO:0003677(DNA binding);GO:0003700(transcription factor activity, sequence-specific DNA binding);GO:0005634(nucleus);GO:0006351(transcription, DNA-templated);GO:0006355(regulation of transcription, DNA-templated);GO:0046872(metal ion binding);GO:0048653(anther development)	-	TGA1	4	989-1009	Y	21.8832	1000	1	1	4	0.957977	.\4_T_Plot\zjhD1\TRINITY_DN45756_c0_g1--1000--miR156g_degradome.jpg
miR156g	TGACAGAAGAGAGTGAGCACT	TRINITY_DN49045_c0_g3	PREDICTED: teosinte glume architecture 1-like [Juglans regia]	GO:0003677(DNA binding);GO:0003700(transcription factor activity, sequence-specific DNA binding);GO:0005634(nucleus);GO:0006351(transcription, DNA-templated);GO:0006355(regulation of transcription, DNA-templated);GO:0046872(metal ion binding);GO:0048653(anther development)	-	SPL13A	2	1321-1341	Y	21.8832	1332	1	1	4	0.984245	.\4_T_Plot\zjhD1\TRINITY_DN49045_c0_g3--1332--miR156g_degradome.jpg
miR156g	TGACAGAAGAGAGTGAGCACT	TRINITY_DN49210_c1_g2	PREDICTED: squamosa promoter-binding-like protein 3 [Juglans regia]	GO:0003677(DNA binding);GO:0003700(transcription factor activity, sequence-specific DNA binding);GO:0005634(nucleus);GO:0005737(cytoplasm);GO:0006351(transcription, DNA-templated);GO:0006355(regulation of transcription, DNA-templated);GO:0009908(flower development);GO:0010321(regulation of vegetative phase change);GO:0046872(metal ion binding)	ko04075(Plant hormone signal transduction)	SPL4	4	579-599	Y	21.8832	590	1	1	4	0.957977	.\4_T_Plot\zjhD1\TRINITY_DN49210_c1_g2--590--miR156g_degradome.jpg
miR156h	TGACAGAAGAGAGTGAGCACT	TRINITY_DN36962_c0_g1	promoter-binding protein SPL10 [Vitis vinifera]	GO:0003677(DNA binding);GO:0003700(transcription factor activity, sequence-specific DNA binding);GO:0005634(nucleus);GO:0006351(transcription, DNA-templated);GO:0006355(regulation of transcription, DNA-templated);GO:0044212(transcription regulatory region DNA binding);GO:0046872(metal ion binding);GO:0048510(regulation of timing of transition from vegetative to reproductive phase);GO:0048653(anth…	ko04075(Plant hormone signal transduction)	SPL12	2	1849-1869	Y	1356.76	1860	62	62	2	0.984174	.\4_T_Plot\zjhD1\TRINITY_DN36962_c0_g1--1860--miR156h_degradome.jpg
miR156h	TGACAGAAGAGAGTGAGCACT	TRINITY_DN45756_c0_g1	PREDICTED: teosinte glume architecture 1-like [Juglans regia]	GO:0003677(DNA binding);GO:0003700(transcription factor activity, sequence-specific DNA binding);GO:0005634(nucleus);GO:0006351(transcription, DNA-templated);GO:0006355(regulation of transcription, DNA-templated);GO:0046872(metal ion binding);GO:0048653(anther development)	-	TGA1	4	989-1009	Y	21.8832	1000	1	1	4	0.957977	.\4_T_Plot\zjhD1\TRINITY_DN45756_c0_g1--1000--miR156h_degradome.jpg
miR156h	TGACAGAAGAGAGTGAGCACT	TRINITY_DN49045_c0_g3	PREDICTED: teosinte glume architecture 1-like [Juglans regia]	GO:0003677(DNA binding);GO:0003700(transcription factor activity, sequence-specific DNA binding);GO:0005634(nucleus);GO:0006351(transcription, DNA-templated);GO:0006355(regulation of transcription, DNA-templated);GO:0046872(metal ion binding);GO:0048653(anther development)	-	SPL13A	2	1321-1341	Y	21.8832	1332	1	1	4	0.984245	.\4_T_Plot\zjhD1\TRINITY_DN49045_c0_g3--1332--miR156h_degradome.jpg
miR156h	TGACAGAAGAGAGTGAGCACT	TRINITY_DN49210_c1_g2	PREDICTED: squamosa promoter-binding-like protein 3 [Juglans regia]	GO:0003677(DNA binding);GO:0003700(transcription factor activity, sequence-specific DNA binding);GO:0005634(nucleus);GO:0005737(cytoplasm);GO:0006351(transcription, DNA-templated);GO:0006355(regulation of transcription, DNA-templated);GO:0009908(flower development);GO:0010321(regulation of vegetative phase change);GO:0046872(metal ion binding)	ko04075(Plant hormone signal transduction)	SPL4	4	579-599	Y	21.8832	590	1	1	4	0.957977	.\4_T_Plot\zjhD1\TRINITY_DN49210_c1_g2--590--miR156h_degradome.jpg
miR156i	TGACAGAAGAGAGTGAGCACC	TRINITY_DN36962_c0_g1	promoter-binding protein SPL10 [Vitis vinifera]	GO:0003677(DNA binding);GO:0003700(transcription factor activity, sequence-specific DNA binding);GO:0005634(nucleus);GO:0006351(transcription, DNA-templated);GO:0006355(regulation of transcription, DNA-templated);GO:0044212(transcription regulatory region DNA binding);GO:0046872(metal ion binding);GO:0048510(regulation of timing of transition from vegetative to reproductive phase);GO:0048653(anth…	ko04075(Plant hormone signal transduction)	SPL12	2	1849-1869	Y	1356.76	1860	62	62	2	0.963735	.\4_T_Plot\zjhD1\TRINITY_DN36962_c0_g1--1860--miR156i_degradome.jpg
miR156i	TGACAGAAGAGAGTGAGCACC	TRINITY_DN46003_c0_g2	endo-1,4-beta-glucanase 1 [Betula luminifera]	GO:0004553(hydrolase activity, hydrolyzing O-glycosyl compounds);GO:0005768(endosome);GO:0005769(early endosome);GO:0005794(Golgi apparatus);GO:0005802(trans-Golgi network);GO:0005886(plasma membrane);GO:0008810(cellulase activity);GO:0009504(cell plate);GO:0009735(response to cytokinin);GO:0009826(unidimensional cell growth);GO:0016021(integral component of membrane);GO:0030244(cellulose biosynt…	ko00500(Starch and sucrose metabolism)	KOR	3.5	2045-2065	Y	525.196	2056	24	24	2	0.452873	.\4_T_Plot\zjhD1\TRINITY_DN46003_c0_g2--2056--miR156i_degradome.jpg
miR156i	TGACAGAAGAGAGTGAGCACC	TRINITY_DN45756_c0_g1	PREDICTED: teosinte glume architecture 1-like [Juglans regia]	GO:0003677(DNA binding);GO:0003700(transcription factor activity, sequence-specific DNA binding);GO:0005634(nucleus);GO:0006351(transcription, DNA-templated);GO:0006355(regulation of transcription, DNA-templated);GO:0046872(metal ion binding);GO:0048653(anther development)	-	TGA1	4	989-1009	Y	21.8832	1000	1	1	4	0.92873	.\4_T_Plot\zjhD1\TRINITY_DN45756_c0_g1--1000--miR156i_degradome.jpg
miR156i	TGACAGAAGAGAGTGAGCACC	TRINITY_DN49045_c0_g3	PREDICTED: teosinte glume architecture 1-like [Juglans regia]	GO:0003677(DNA binding);GO:0003700(transcription factor activity, sequence-specific DNA binding);GO:0005634(nucleus);GO:0006351(transcription, DNA-templated);GO:0006355(regulation of transcription, DNA-templated);GO:0046872(metal ion binding);GO:0048653(anther development)	-	SPL13A	2	1321-1341	Y	21.8832	1332	1	1	4	0.963864	.\4_T_Plot\zjhD1\TRINITY_DN49045_c0_g3--1332--miR156i_degradome.jpg
miR156i	TGACAGAAGAGAGTGAGCACC	TRINITY_DN49210_c1_g2	PREDICTED: squamosa promoter-binding-like protein 3 [Juglans regia]	GO:0003677(DNA binding);GO:0003700(transcription factor activity, sequence-specific DNA binding);GO:0005634(nucleus);GO:0005737(cytoplasm);GO:0006351(transcription, DNA-templated);GO:0006355(regulation of transcription, DNA-templated);GO:0009908(flower development);GO:0010321(regulation of vegetative phase change);GO:0046872(metal ion binding)	ko04075(Plant hormone signal transduction)	SPL4	4	579-599	Y	21.8832	590	1	1	4	0.92873	.\4_T_Plot\zjhD1\TRINITY_DN49210_c1_g2--590--miR156i_degradome.jpg
miR156i	TGACAGAAGAGAGTGAGCACC	TRINITY_DN56225_c0_g1	-	-	-	-	4	328-347	Y	207.89	339	19	9.5	2	0.928528	.\4_T_Plot\zjhD1\TRINITY_DN56225_c0_g1--339--miR156i_degradome.jpg
miR156j	TTGACAGAAGATAGAGAGCAC	TRINITY_DN36962_c0_g1	promoter-binding protein SPL10 [Vitis vinifera]	GO:0003677(DNA binding);GO:0003700(transcription factor activity, sequence-specific DNA binding);GO:0005634(nucleus);GO:0006351(transcription, DNA-templated);GO:0006355(regulation of transcription, DNA-templated);GO:0044212(transcription regulatory region DNA binding);GO:0046872(metal ion binding);GO:0048510(regulation of timing of transition from vegetative to reproductive phase);GO:0048653(anth…	ko04075(Plant hormone signal transduction)	SPL12	2	1850-1870	Y	3895.2	1861	178	178	0	0.016363	.\4_T_Plot\zjhD1\TRINITY_DN36962_c0_g1--1861--miR156j_degradome.jpg
miR156j	TTGACAGAAGATAGAGAGCAC	TRINITY_DN37377_c2_g5	SBP-box transcription factor [Betula luminifera]	GO:0003677(DNA binding);GO:0003700(transcription factor activity, sequence-specific DNA binding);GO:0005634(nucleus);GO:0006351(transcription, DNA-templated);GO:0006355(regulation of transcription, DNA-templated);GO:0046872(metal ion binding);GO:0048653(anther development)	-	SPL13A	3	111-131	Y	21.8832	122	1	1	4	0.966491	.\4_T_Plot\zjhD1\TRINITY_DN37377_c2_g5--122--miR156j_degradome.jpg
miR156j	TTGACAGAAGATAGAGAGCAC	TRINITY_DN39454_c0_g1	PREDICTED: uncharacterized protein LOC109005000 isoform X1 [Juglans regia]	GO:0003677(DNA binding);GO:0005634(nucleus);GO:0008150(biological_process);GO:0046983(protein dimerization activity)	ko02010(ABC transporters)	-	4	332-352	Y	43.7663	343	2	2	1	0.00802193	.\4_T_Plot\zjhD1\TRINITY_DN39454_c0_g1--343--miR156j_degradome.jpg
miR156j	TTGACAGAAGATAGAGAGCAC	TRINITY_DN45756_c0_g1	PREDICTED: teosinte glume architecture 1-like [Juglans regia]	GO:0003677(DNA binding);GO:0003700(transcription factor activity, sequence-specific DNA binding);GO:0005634(nucleus);GO:0006351(transcription, DNA-templated);GO:0006355(regulation of transcription, DNA-templated);GO:0046872(metal ion binding);GO:0048653(anther development)	-	TGA1	1	990-1010	Y	21.8832	1001	1	1	4	0.625081	.\4_T_Plot\zjhD1\TRINITY_DN45756_c0_g1--1001--miR156j_degradome.jpg
miR156j	TTGACAGAAGATAGAGAGCAC	TRINITY_DN54675_c1_g2	PREDICTED: squamosa promoter-binding-like protein 9 isoform X1 [Juglans regia]	GO:0003677(DNA binding);GO:0003700(transcription factor activity, sequence-specific DNA binding);GO:0005634(nucleus);GO:0005737(cytoplasm);GO:0006351(transcription, DNA-templated);GO:0006355(regulation of transcription, DNA-templated);GO:0010228(vegetative to reproductive phase transition of meristem);GO:0046872(metal ion binding);GO:0048366(leaf development);GO:0048653(anther development);GO:200…	-	SPL14	2	487-507	Y	21.8832	498	1	1	4	0.809905	.\4_T_Plot\zjhD1\TRINITY_DN54675_c1_g2--498--miR156j_degradome.jpg
miR156j	TTGACAGAAGATAGAGAGCAC	TRINITY_DN53506_c0_g1	PREDICTED: putative F-box protein At1g65770 [Juglans regia]	GO:0003677(DNA binding);GO:0005634(nucleus);GO:0005694(chromosome);GO:0005737(cytoplasm);GO:0006260(DNA replication);GO:0006284(base-excision repair);GO:0006302(double-strand break repair);GO:0006310(DNA recombination);GO:0009378(four-way junction helicase activity);GO:0032508(DNA duplex unwinding);GO:0043140(ATP-dependent 3'-5' DNA helicase activity)	-	SKIP23	4	229-248	Y	43.7663	240	2	2	2	0.928528	.\4_T_Plot\zjhD1\TRINITY_DN53506_c0_g1--240--miR156j_degradome.jpg
miR158a-3p	TCCCAAATGTAGACAAAGCA	TRINITY_DN52195_c1_g1	PREDICTED: uncharacterized protein LOC109006835 [Juglans regia]	-	-	-	3.5	305-325	Y	131.299	316	6	6	2	0.700652	.\4_T_Plot\zjhD1\TRINITY_DN52195_c1_g1--316--miR158a-3p_degradome.jpg
miR159a	TTTGGATTGAAGGGAGCTTA	TRINITY_DN48575_c0_g5	PREDICTED: rho GTPase-activating protein 5-like [Juglans regia]	GO:0005096(GTPase activator activity);GO:0007165(signal transduction);GO:0009507(chloroplast)	-	ROPGAP1	4	122-141	Y	43.7663	132	2	2	2	0.994892	.\4_T_Plot\zjhD1\TRINITY_DN48575_c0_g5--132--miR159a_degradome.jpg
miR159b	TTTGGATTGAAGGGAGCTCTTT	TRINITY_DN42269_c0_g1	PREDICTED: long chain acyl-CoA synthetase 9, chloroplastic [Juglans regia]	GO:0004467(long-chain fatty acid-CoA ligase activity);GO:0005524(ATP binding);GO:0005739(mitochondrion);GO:0006631(fatty acid metabolic process);GO:0006633(fatty acid biosynthetic process);GO:0009507(chloroplast);GO:0009536(plastid);GO:0009941(chloroplast envelope);GO:0016020(membrane)	ko01212(Fatty acid metabolism);ko00061(Fatty acid biosynthesis);ko00071(Fatty acid dkoadation);ko04146(Peroxisome)	LACS9	4	1803-1824	Y	21.8832	1815	1	1	4	0.410367	.\4_T_Plot\zjhD1\TRINITY_DN42269_c0_g1--1815--miR159b_degradome.jpg
miR159b	TTTGGATTGAAGGGAGCTCTTT	TRINITY_DN48575_c0_g5	PREDICTED: rho GTPase-activating protein 5-like [Juglans regia]	GO:0005096(GTPase activator activity);GO:0007165(signal transduction);GO:0009507(chloroplast)	-	ROPGAP1	2.5	120-141	Y	43.7663	132	2	2	2	0.529445	.\4_T_Plot\zjhD1\TRINITY_DN48575_c0_g5--132--miR159b_degradome.jpg
miR159c-5p	GAGCTCCTTGAAGTCCAATGG	TRINITY_DN37904_c0_g1	PREDICTED: clavaminate synthase-like protein At3g21360 [Juglans regia]	GO:0005634(nucleus);GO:0016491(oxidoreductase activity);GO:0046872(metal ion binding);GO:0055114(oxidation-reduction process)	-	At3g21360	4	397-416	Y	21.8832	407	1	1	4	0.652333	.\4_T_Plot\zjhD1\TRINITY_DN37904_c0_g1--407--miR159c-5p_degradome.jpg
miR160a	TGCCTGGCTCCCTGTATGCCA	TRINITY_DN44785_c0_g1	hypothetical protein CICLE_v10030860mg [Citrus clementina]	GO:0003677(DNA binding);GO:0003700(transcription factor activity, sequence-specific DNA binding);GO:0005634(nucleus);GO:0006351(transcription, DNA-templated);GO:0006355(regulation of transcription, DNA-templated);GO:0007389(pattern specification process);GO:0009733(response to auxin);GO:0009734(auxin-activated signaling pathway);GO:0035198(miRNA binding);GO:0048829(root cap development);GO:005130…	ko04075(Plant hormone signal transduction)	ARF22	1	888-908	Y	2757.28	899	126	126	0	0.00970167	.\4_T_Plot\zjhD1\TRINITY_DN44785_c0_g1--899--miR160a_degradome.jpg
miR160a	TGCCTGGCTCCCTGTATGCCA	TRINITY_DN51591_c0_g4	PREDICTED: auxin response factor 17-like [Juglans regia]	GO:0000987(core promoter proximal region sequence-specific DNA binding);GO:0003700(transcription factor activity, sequence-specific DNA binding);GO:0005634(nucleus);GO:0006351(transcription, DNA-templated);GO:0006355(regulation of transcription, DNA-templated);GO:0009555(pollen development);GO:0009653(anatomical structure morphogenesis);GO:0009734(auxin-activated signaling pathway);GO:0010208(pol…	ko04075(Plant hormone signal transduction)	ARF17	0.5	1495-1515	Y	109.416	1506	5	5	2	0.651939	.\4_T_Plot\zjhD1\TRINITY_DN51591_c0_g4--1506--miR160a_degradome.jpg
miR160b	TGCCTGGCTCCCTGTATGCT	TRINITY_DN44785_c0_g1	hypothetical protein CICLE_v10030860mg [Citrus clementina]	GO:0003677(DNA binding);GO:0003700(transcription factor activity, sequence-specific DNA binding);GO:0005634(nucleus);GO:0006351(transcription, DNA-templated);GO:0006355(regulation of transcription, DNA-templated);GO:0007389(pattern specification process);GO:0009733(response to auxin);GO:0009734(auxin-activated signaling pathway);GO:0035198(miRNA binding);GO:0048829(root cap development);GO:005130…	ko04075(Plant hormone signal transduction)	ARF22	0.5	889-908	Y	2757.28	899	126	126	0	0.010444	.\4_T_Plot\zjhD1\TRINITY_DN44785_c0_g1--899--miR160b_degradome.jpg
miR160b	TGCCTGGCTCCCTGTATGCT	TRINITY_DN51591_c0_g4	PREDICTED: auxin response factor 17-like [Juglans regia]	GO:0000987(core promoter proximal region sequence-specific DNA binding);GO:0003700(transcription factor activity, sequence-specific DNA binding);GO:0005634(nucleus);GO:0006351(transcription, DNA-templated);GO:0006355(regulation of transcription, DNA-templated);GO:0009555(pollen development);GO:0009653(anatomical structure morphogenesis);GO:0009734(auxin-activated signaling pathway);GO:0010208(pol…	ko04075(Plant hormone signal transduction)	ARF17	1	1496-1515	Y	109.416	1506	5	5	2	0.624687	.\4_T_Plot\zjhD1\TRINITY_DN51591_c0_g4--1506--miR160b_degradome.jpg
miR162a	TCGATAAACCTCTGCATCCAG	TRINITY_DN51193_c0_g2	PREDICTED: endoribonuclease Dicer homolog 1 [Juglans regia]	GO:0003723(RNA binding);GO:0004525(ribonuclease III activity);GO:0005634(nucleus);GO:0005737(cytoplasm);GO:0016442(RISC complex);GO:0030422(production of siRNA involved in RNA interference)	ko03008(Ribosome biogenesis in eukaryotes)	DCL1	2	2517-2538	Y	175.065	2528	8	8	2	0.563613	.\4_T_Plot\zjhD1\TRINITY_DN51193_c0_g2--2528--miR162a_degradome.jpg
miR164a	TGGAGAAGCAGGGCACGTGCA	TRINITY_DN39853_c0_g1	hypothetical protein PHAVU_005G055400g [Phaseolus vulgaris]	GO:0003677(DNA binding);GO:0003700(transcription factor activity, sequence-specific DNA binding);GO:0005634(nucleus);GO:0006351(transcription, DNA-templated);GO:0006355(regulation of transcription, DNA-templated);GO:0007275(multicellular organism development);GO:0009734(auxin-activated signaling pathway);GO:0010072(primary shoot apical meristem specification);GO:0048527(lateral root development)	ko03018(RNA dkoadation)	NAC021	2	704-724	Y	1006.63	715	46	46	0	0.00821525	.\4_T_Plot\zjhD1\TRINITY_DN39853_c0_g1--715--miR164a_degradome.jpg
miR166a	TCGGACCAGGCTTCATTCCCC	TRINITY_DN41212_c0_g7	class III HD-Zip protein HDZ1 [Betula luminifera]	GO:0003677(DNA binding);GO:0003700(transcription factor activity, sequence-specific DNA binding);GO:0005634(nucleus);GO:0006351(transcription, DNA-templated);GO:0006355(regulation of transcription, DNA-templated);GO:0008289(lipid binding);GO:0009855(determination of bilateral symmetry);GO:0009944(polarity specification of adaxial/abaxial axis);GO:0009955(adaxial/abaxial pattern specification);GO:…	-	ATHB-14	3	140-160	Y	919.093	151	62	42	0	0.0200444	.\4_T_Plot\zjhD1\TRINITY_DN41212_c0_g7--151--miR166a_degradome.jpg
miR166a	TCGGACCAGGCTTCATTCCCC	TRINITY_DN54009_c1_g6	PREDICTED: homeobox-leucine zipper protein REVOLUTA-like [Juglans regia]	GO:0003677(DNA binding);GO:0003700(transcription factor activity, sequence-specific DNA binding);GO:0005634(nucleus);GO:0006351(transcription, DNA-templated);GO:0006355(regulation of transcription, DNA-templated);GO:0008289(lipid binding);GO:0009855(determination of bilateral symmetry);GO:0009944(polarity specification of adaxial/abaxial axis);GO:0009956(radial pattern formation);GO:0010014(meris…	-	REV	3	593-613	Y	1072.28	604	49	49	0	0.0200444	.\4_T_Plot\zjhD1\TRINITY_DN54009_c1_g6--604--miR166a_degradome.jpg
miR166a	TCGGACCAGGCTTCATTCCCC	TRINITY_DN53307_c2_g2	PREDICTED: homeobox-leucine zipper protein ATHB-8-like isoform X1 [Juglans regia]	GO:0003677(DNA binding);GO:0003700(transcription factor activity, sequence-specific DNA binding);GO:0005634(nucleus);GO:0006351(transcription, DNA-templated);GO:0006355(regulation of transcription, DNA-templated);GO:0008284(positive regulation of cell proliferation);GO:0008289(lipid binding);GO:0009733(response to auxin);GO:0010014(meristem initiation);GO:0010067(procambium histogenesis);GO:00100…	-	ATHB-8	3	788-808	Y	437.663	799	40	20	2	0.869368	.\4_T_Plot\zjhD1\TRINITY_DN53307_c2_g2--799--miR166a_degradome.jpg
miR166a-5p	GGAATGCTGTCTGGTTCGAGA	TRINITY_DN44011_c0_g5	PREDICTED: uncharacterized protein LOC109001953 [Juglans regia]	GO:0003674(molecular_function);GO:0008150(biological_process);GO:0009507(chloroplast);GO:0009535(chloroplast thylakoid membrane);GO:0016021(integral component of membrane)	-	-	3.5	591-612	Y	21.8832	603	1	1	4	0.453227	.\4_T_Plot\zjhD1\TRINITY_DN44011_c0_g5--603--miR166a-5p_degradome.jpg
miR166b	GCGGACCAGGCTTCATTCCCC	TRINITY_DN41212_c0_g7	class III HD-Zip protein HDZ1 [Betula luminifera]	GO:0003677(DNA binding);GO:0003700(transcription factor activity, sequence-specific DNA binding);GO:0005634(nucleus);GO:0006351(transcription, DNA-templated);GO:0006355(regulation of transcription, DNA-templated);GO:0008289(lipid binding);GO:0009855(determination of bilateral symmetry);GO:0009944(polarity specification of adaxial/abaxial axis);GO:0009955(adaxial/abaxial pattern specification);GO:…	-	ATHB-14	3.5	140-160	Y	919.093	151	62	42	0	0.0178372	.\4_T_Plot\zjhD1\TRINITY_DN41212_c0_g7--151--miR166b_degradome.jpg
miR166b	GCGGACCAGGCTTCATTCCCC	TRINITY_DN54009_c1_g6	PREDICTED: homeobox-leucine zipper protein REVOLUTA-like [Juglans regia]	GO:0003677(DNA binding);GO:0003700(transcription factor activity, sequence-specific DNA binding);GO:0005634(nucleus);GO:0006351(transcription, DNA-templated);GO:0006355(regulation of transcription, DNA-templated);GO:0008289(lipid binding);GO:0009855(determination of bilateral symmetry);GO:0009944(polarity specification of adaxial/abaxial axis);GO:0009956(radial pattern formation);GO:0010014(meris…	-	REV	3.5	593-613	Y	1072.28	604	49	49	0	0.0178372	.\4_T_Plot\zjhD1\TRINITY_DN54009_c1_g6--604--miR166b_degradome.jpg
miR166b	GCGGACCAGGCTTCATTCCCC	TRINITY_DN53307_c2_g2	PREDICTED: homeobox-leucine zipper protein ATHB-8-like isoform X1 [Juglans regia]	GO:0003677(DNA binding);GO:0003700(transcription factor activity, sequence-specific DNA binding);GO:0005634(nucleus);GO:0006351(transcription, DNA-templated);GO:0006355(regulation of transcription, DNA-templated);GO:0008284(positive regulation of cell proliferation);GO:0008289(lipid binding);GO:0009733(response to auxin);GO:0010014(meristem initiation);GO:0010067(procambium histogenesis);GO:00100…	-	ATHB-8	3.5	788-808	Y	437.663	799	40	20	2	0.836218	.\4_T_Plot\zjhD1\TRINITY_DN53307_c2_g2--799--miR166b_degradome.jpg
miR166b-5p	GGAATGTTGTCTGGCTCG	TRINITY_DN48876_c0_g1	PREDICTED: uncharacterized protein LOC108979730 isoform X1 [Juglans regia]	GO:0003674(molecular_function);GO:0005737(cytoplasm);GO:0009793(embryo development ending in seed dormancy)	-	-	4	129-147	Y	21.8832	138	1	1	4	0.999926	.\4_T_Plot\zjhD1\TRINITY_DN48876_c0_g1--138--miR166b-5p_degradome.jpg
miR166c	TTCGGACCAGGCTTCATTCCCC	TRINITY_DN41212_c0_g7	class III HD-Zip protein HDZ1 [Betula luminifera]	GO:0003677(DNA binding);GO:0003700(transcription factor activity, sequence-specific DNA binding);GO:0005634(nucleus);GO:0006351(transcription, DNA-templated);GO:0006355(regulation of transcription, DNA-templated);GO:0008289(lipid binding);GO:0009855(determination of bilateral symmetry);GO:0009944(polarity specification of adaxial/abaxial axis);GO:0009955(adaxial/abaxial pattern specification);GO:…	-	ATHB-14	3.5	140-161	Y	43.7663	152	3	2	2	0.836218	.\4_T_Plot\zjhD1\TRINITY_DN41212_c0_g7--152--miR166c_degradome.jpg
miR166c	TTCGGACCAGGCTTCATTCCCC	TRINITY_DN54009_c1_g6	PREDICTED: homeobox-leucine zipper protein REVOLUTA-like [Juglans regia]	GO:0003677(DNA binding);GO:0003700(transcription factor activity, sequence-specific DNA binding);GO:0005634(nucleus);GO:0006351(transcription, DNA-templated);GO:0006355(regulation of transcription, DNA-templated);GO:0008289(lipid binding);GO:0009855(determination of bilateral symmetry);GO:0009944(polarity specification of adaxial/abaxial axis);GO:0009956(radial pattern formation);GO:0010014(meris…	-	REV	3.5	593-614	Y	350.131	605	16	16	2	0.836218	.\4_T_Plot\zjhD1\TRINITY_DN54009_c1_g6--605--miR166c_degradome.jpg
miR166c	TTCGGACCAGGCTTCATTCCCC	TRINITY_DN53307_c2_g2	PREDICTED: homeobox-leucine zipper protein ATHB-8-like isoform X1 [Juglans regia]	GO:0003677(DNA binding);GO:0003700(transcription factor activity, sequence-specific DNA binding);GO:0005634(nucleus);GO:0006351(transcription, DNA-templated);GO:0006355(regulation of transcription, DNA-templated);GO:0008284(positive regulation of cell proliferation);GO:0008289(lipid binding);GO:0009733(response to auxin);GO:0010014(meristem initiation);GO:0010067(procambium histogenesis);GO:00100…	-	ATHB-8	3.5	788-809	Y	21.8832	800	2	1	2	0.836218	.\4_T_Plot\zjhD1\TRINITY_DN53307_c2_g2--800--miR166c_degradome.jpg
miR166d	TTCGGACCAGGCTTCATTCCCC	TRINITY_DN41212_c0_g7	class III HD-Zip protein HDZ1 [Betula luminifera]	GO:0003677(DNA binding);GO:0003700(transcription factor activity, sequence-specific DNA binding);GO:0005634(nucleus);GO:0006351(transcription, DNA-templated);GO:0006355(regulation of transcription, DNA-templated);GO:0008289(lipid binding);GO:0009855(determination of bilateral symmetry);GO:0009944(polarity specification of adaxial/abaxial axis);GO:0009955(adaxial/abaxial pattern specification);GO:…	-	ATHB-14	3.5	140-161	Y	43.7663	152	3	2	2	0.836218	.\4_T_Plot\zjhD1\TRINITY_DN41212_c0_g7--152--miR166d_degradome.jpg
miR166d	TTCGGACCAGGCTTCATTCCCC	TRINITY_DN54009_c1_g6	PREDICTED: homeobox-leucine zipper protein REVOLUTA-like [Juglans regia]	GO:0003677(DNA binding);GO:0003700(transcription factor activity, sequence-specific DNA binding);GO:0005634(nucleus);GO:0006351(transcription, DNA-templated);GO:0006355(regulation of transcription, DNA-templated);GO:0008289(lipid binding);GO:0009855(determination of bilateral symmetry);GO:0009944(polarity specification of adaxial/abaxial axis);GO:0009956(radial pattern formation);GO:0010014(meris…	-	REV	3.5	593-614	Y	350.131	605	16	16	2	0.836218	.\4_T_Plot\zjhD1\TRINITY_DN54009_c1_g6--605--miR166d_degradome.jpg
miR166d	TTCGGACCAGGCTTCATTCCCC	TRINITY_DN53307_c2_g2	PREDICTED: homeobox-leucine zipper protein ATHB-8-like isoform X1 [Juglans regia]	GO:0003677(DNA binding);GO:0003700(transcription factor activity, sequence-specific DNA binding);GO:0005634(nucleus);GO:0006351(transcription, DNA-templated);GO:0006355(regulation of transcription, DNA-templated);GO:0008284(positive regulation of cell proliferation);GO:0008289(lipid binding);GO:0009733(response to auxin);GO:0010014(meristem initiation);GO:0010067(procambium histogenesis);GO:00100…	-	ATHB-8	3.5	788-809	Y	21.8832	800	2	1	2	0.836218	.\4_T_Plot\zjhD1\TRINITY_DN53307_c2_g2--800--miR166d_degradome.jpg
miR166g	TCCCGGACCAGGCTTCATTCC	TRINITY_DN41212_c0_g7	class III HD-Zip protein HDZ1 [Betula luminifera]	GO:0003677(DNA binding);GO:0003700(transcription factor activity, sequence-specific DNA binding);GO:0005634(nucleus);GO:0006351(transcription, DNA-templated);GO:0006355(regulation of transcription, DNA-templated);GO:0008289(lipid binding);GO:0009855(determination of bilateral symmetry);GO:0009944(polarity specification of adaxial/abaxial axis);GO:0009955(adaxial/abaxial pattern specification);GO:…	-	ATHB-14	3.5	142-162	Y	131.299	153	10	6	2	0.836218	.\4_T_Plot\zjhD1\TRINITY_DN41212_c0_g7--153--miR166g_degradome.jpg
miR166g	TCCCGGACCAGGCTTCATTCC	TRINITY_DN54009_c1_g6	PREDICTED: homeobox-leucine zipper protein REVOLUTA-like [Juglans regia]	GO:0003677(DNA binding);GO:0003700(transcription factor activity, sequence-specific DNA binding);GO:0005634(nucleus);GO:0006351(transcription, DNA-templated);GO:0006355(regulation of transcription, DNA-templated);GO:0008289(lipid binding);GO:0009855(determination of bilateral symmetry);GO:0009944(polarity specification of adaxial/abaxial axis);GO:0009956(radial pattern formation);GO:0010014(meris…	-	REV	3.5	595-615	Y	393.897	606	18	18	2	0.836218	.\4_T_Plot\zjhD1\TRINITY_DN54009_c1_g6--606--miR166g_degradome.jpg
miR166g	TCCCGGACCAGGCTTCATTCC	TRINITY_DN53307_c2_g2	PREDICTED: homeobox-leucine zipper protein ATHB-8-like isoform X1 [Juglans regia]	GO:0003677(DNA binding);GO:0003700(transcription factor activity, sequence-specific DNA binding);GO:0005634(nucleus);GO:0006351(transcription, DNA-templated);GO:0006355(regulation of transcription, DNA-templated);GO:0008284(positive regulation of cell proliferation);GO:0008289(lipid binding);GO:0009733(response to auxin);GO:0010014(meristem initiation);GO:0010067(procambium histogenesis);GO:00100…	-	ATHB-8	3.5	790-810	Y	87.5327	801	8	4	2	0.836218	.\4_T_Plot\zjhD1\TRINITY_DN53307_c2_g2--801--miR166g_degradome.jpg
miR167a-3p	AGATCATGCGGCAGTTTCACC	TRINITY_DN45257_c0_g4	PREDICTED: protein MICRORCHIDIA 7-like [Juglans regia]	GO:0005524(ATP binding);GO:0005634(nucleus);GO:0006281(DNA repair);GO:0016301(kinase activity);GO:0016310(phosphorylation);GO:0016568(chromatin modification);GO:0031047(gene silencing by RNA)	-	MORC4	3.5	2268-2287	Y	21.8832	2278	1	1	4	0.701039	.\4_T_Plot\zjhD1\TRINITY_DN45257_c0_g4--2278--miR167a-3p_degradome.jpg
miR167b	TGAAGCTGCCAGCATGATCTA	TRINITY_DN39499_c1_g3	PREDICTED: LOW QUALITY PROTEIN: auxin response factor 8-like [Juglans regia]	GO:0003677(DNA binding);GO:0003700(transcription factor activity, sequence-specific DNA binding);GO:0005634(nucleus);GO:0006351(transcription, DNA-templated);GO:0006355(regulation of transcription, DNA-templated);GO:0009733(response to auxin);GO:0009734(auxin-activated signaling pathway);GO:0009908(flower development)	ko04075(Plant hormone signal transduction)	ARF8	4	862-883	Y	6871.32	873	628	314	0	0.0156251	.\4_T_Plot\zjhD1\TRINITY_DN39499_c1_g3--873--miR167b_degradome.jpg
miR167c	TAAAGCTGCCAGCATGATCTGG	TRINITY_DN39499_c1_g3	PREDICTED: LOW QUALITY PROTEIN: auxin response factor 8-like [Juglans regia]	GO:0003677(DNA binding);GO:0003700(transcription factor activity, sequence-specific DNA binding);GO:0005634(nucleus);GO:0006351(transcription, DNA-templated);GO:0006355(regulation of transcription, DNA-templated);GO:0009733(response to auxin);GO:0009734(auxin-activated signaling pathway);GO:0009908(flower development)	ko04075(Plant hormone signal transduction)	ARF8	4	861-883	Y	6871.32	873	628	314	0	0.010444	.\4_T_Plot\zjhD1\TRINITY_DN39499_c1_g3--873--miR167c_degradome.jpg
miR167c-3p	AGGTCATCTTGCAGCTTCAAT	TRINITY_DN48728_c0_g4	PREDICTED: brefeldin A-inhibited guanine nucleotide-exchange protein 5 isoform X1 [Juglans regia]	GO:0005085(guanyl-nucleotide exchange factor activity);GO:0005086(ARF guanyl-nucleotide exchange factor activity);GO:0005515(protein binding);GO:0005634(nucleus);GO:0005769(early endosome);GO:0005802(trans-Golgi network);GO:0005829(cytosol);GO:0006897(endocytosis);GO:0006955(immune response);GO:0015031(protein transport);GO:0016032(viral process);GO:0016192(vesicle-mediated transport);GO:0031901(…	ko04144(Endocytosis)	BIG5	3.5	1384-1404	Y	21.8832	1395	1	1	4	0.453227	.\4_T_Plot\zjhD1\TRINITY_DN48728_c0_g4--1395--miR167c-3p_degradome.jpg
miR168a-3p	CCCGCCTTGCATCAACTGAAT	TRINITY_DN38217_c0_g1	PREDICTED: FAD-linked sulfhydryl oxidase ERV1 [Juglans regia]	GO:0005634(nucleus);GO:0005739(mitochondrion);GO:0016972(thiol oxidase activity);GO:0042802(identical protein binding);GO:0050660(flavin adenine dinucleotide binding);GO:0055114(oxidation-reduction process)	-	ERV1	4	1216-1236	Y	21.8832	1227	1	1	4	0.652333	.\4_T_Plot\zjhD1\TRINITY_DN38217_c0_g1--1227--miR168a-3p_degradome.jpg
miR169a-3p	CCTTGGCTCACCTTCGCTCTC	TRINITY_DN46139_c0_g11	PREDICTED: DNA helicase INO80-like isoform X1 [Juglans regia]	GO:0000070(mitotic sister chromatid segregation);GO:0000724(double-strand break repair via homologous recombination);GO:0003677(DNA binding);GO:0003678(DNA helicase activity);GO:0005524(ATP binding);GO:0006338(chromatin remodeling);GO:0006351(transcription, DNA-templated);GO:0010571(positive regulation of nuclear cell cycle DNA replication);GO:0016887(ATPase activity);GO:0030307(positive regulati…	-	INO80	3.5	230-249	Y	21.8832	241	1	1	4	0.453227	.\4_T_Plot\zjhD1\TRINITY_DN46139_c0_g11--241--miR169a-3p_degradome.jpg
miR169b	TAGCCAAGAATGACTTGCC	TRINITY_DN46176_c0_g1	PREDICTED: nuclear transcription factor Y subunit A-1-like isoform X1 [Juglans regia]	GO:0003677(DNA binding);GO:0003700(transcription factor activity, sequence-specific DNA binding);GO:0005634(nucleus);GO:0006351(transcription, DNA-templated);GO:0006355(regulation of transcription, DNA-templated);GO:0016602(CCAAT-binding factor complex);GO:0045892(negative regulation of transcription, DNA-templated)	ko00970(Aminoacyl-tRNA biosynthesis)	NFYA7	2	668-686	Y	437.663	677	20	20	0	0.0324583	.\4_T_Plot\zjhD1\TRINITY_DN46176_c0_g1--677--miR169b_degradome.jpg
miR169b	TAGCCAAGAATGACTTGCC	TRINITY_DN50909_c0_g2	PREDICTED: clathrin light chain 2-like [Juglans regia]	GO:0005198(structural molecule activity);GO:0030125(clathrin vesicle coat);GO:0032050(clathrin heavy chain binding);GO:0072583(clathrin-mediated endocytosis)	ko04144(Endocytosis)	At2g20760	4	606-624	Y	262.598	615	12	12	2	0.991341	.\4_T_Plot\zjhD1\TRINITY_DN50909_c0_g2--615--miR169b_degradome.jpg
miR169b	TAGCCAAGAATGACTTGCC	TRINITY_DN55120_c1_g5	PREDICTED: nuclear transcription factor Y subunit A-10-like isoform X1 [Juglans regia]	GO:0003677(DNA binding);GO:0003700(transcription factor activity, sequence-specific DNA binding);GO:0005634(nucleus);GO:0006351(transcription, DNA-templated);GO:0006355(regulation of transcription, DNA-templated);GO:0009567(double fertilization forming a zygote and endosperm);GO:0016602(CCAAT-binding factor complex)	-	NFYA2	2	1590-1608	Y	350.131	1599	16	16	2	0.963735	.\4_T_Plot\zjhD1\TRINITY_DN55120_c1_g5--1599--miR169b_degradome.jpg
miR169b	TAGCCAAGAATGACTTGCC	TRINITY_DN54805_c0_g1	PREDICTED: nuclear pore complex protein NUP1-like [Juglans regia]	GO:0005515(protein binding);GO:0005634(nucleus);GO:0005635(nuclear envelope);GO:0005643(nuclear pore);GO:0005829(cytosol);GO:0006997(nucleus organization);GO:0015031(protein transport);GO:0016973(poly(A)+ mRNA export from nucleus);GO:0034399(nuclear periphery)	ko03440(Homologous recombination)	NUP1	4	4456-4473	Y	21.8832	4465	1	1	4	0.991385	.\4_T_Plot\zjhD1\TRINITY_DN54805_c0_g1--4465--miR169b_degradome.jpg
miR169b	TAGCCAAGAATGACTTGCC	TRINITY_DN56940_c0_g2	-	-	-	-	2	168-186	Y	1466.17	177	67	67	0	0.0324583	.\4_T_Plot\zjhD1\TRINITY_DN56940_c0_g2--177--miR169b_degradome.jpg
miR169c	TGAGCCAAGAATGACTTGCCGAC	TRINITY_DN46176_c0_g1	PREDICTED: nuclear transcription factor Y subunit A-1-like isoform X1 [Juglans regia]	GO:0003677(DNA binding);GO:0003700(transcription factor activity, sequence-specific DNA binding);GO:0005634(nucleus);GO:0006351(transcription, DNA-templated);GO:0006355(regulation of transcription, DNA-templated);GO:0016602(CCAAT-binding factor complex);GO:0045892(negative regulation of transcription, DNA-templated)	ko00970(Aminoacyl-tRNA biosynthesis)	NFYA7	4	664-687	Y	43.7663	678	2	2	2	0.651939	.\4_T_Plot\zjhD1\TRINITY_DN46176_c0_g1--678--miR169c_degradome.jpg
miR169c	TGAGCCAAGAATGACTTGCCGAC	TRINITY_DN55120_c1_g5	PREDICTED: nuclear transcription factor Y subunit A-10-like isoform X1 [Juglans regia]	GO:0003677(DNA binding);GO:0003700(transcription factor activity, sequence-specific DNA binding);GO:0005634(nucleus);GO:0006351(transcription, DNA-templated);GO:0006355(regulation of transcription, DNA-templated);GO:0009567(double fertilization forming a zygote and endosperm);GO:0016602(CCAAT-binding factor complex)	-	NFYA2	3	1539-1561	Y	21.8832	1552	1	1	4	0.49297	.\4_T_Plot\zjhD1\TRINITY_DN55120_c1_g5--1552--miR169c_degradome.jpg
miR169c	TGAGCCAAGAATGACTTGCCGAC	TRINITY_DN56940_c0_g2	-	-	-	-	4	165-187	Y	43.7663	178	2	2	2	0.651939	.\4_T_Plot\zjhD1\TRINITY_DN56940_c0_g2--178--miR169c_degradome.jpg
miR169d	TAGCCAAGGATGACTTGCCTG	TRINITY_DN46176_c0_g1	PREDICTED: nuclear transcription factor Y subunit A-1-like isoform X1 [Juglans regia]	GO:0003677(DNA binding);GO:0003700(transcription factor activity, sequence-specific DNA binding);GO:0005634(nucleus);GO:0006351(transcription, DNA-templated);GO:0006355(regulation of transcription, DNA-templated);GO:0016602(CCAAT-binding factor complex);GO:0045892(negative regulation of transcription, DNA-templated)	ko00970(Aminoacyl-tRNA biosynthesis)	NFYA7	3	666-686	Y	437.663	677	20	20	0	0.00672661	.\4_T_Plot\zjhD1\TRINITY_DN46176_c0_g1--677--miR169d_degradome.jpg
miR169d	TAGCCAAGGATGACTTGCCTG	TRINITY_DN55120_c1_g5	PREDICTED: nuclear transcription factor Y subunit A-10-like isoform X1 [Juglans regia]	GO:0003677(DNA binding);GO:0003700(transcription factor activity, sequence-specific DNA binding);GO:0005634(nucleus);GO:0006351(transcription, DNA-templated);GO:0006355(regulation of transcription, DNA-templated);GO:0009567(double fertilization forming a zygote and endosperm);GO:0016602(CCAAT-binding factor complex)	-	NFYA2	3.5	1588-1608	Y	350.131	1599	16	16	2	0.452873	.\4_T_Plot\zjhD1\TRINITY_DN55120_c1_g5--1599--miR169d_degradome.jpg
miR169f	CAGCCAAGGATGACTTGCCGA	TRINITY_DN46176_c0_g1	PREDICTED: nuclear transcription factor Y subunit A-1-like isoform X1 [Juglans regia]	GO:0003677(DNA binding);GO:0003700(transcription factor activity, sequence-specific DNA binding);GO:0005634(nucleus);GO:0006351(transcription, DNA-templated);GO:0006355(regulation of transcription, DNA-templated);GO:0016602(CCAAT-binding factor complex);GO:0045892(negative regulation of transcription, DNA-templated)	ko00970(Aminoacyl-tRNA biosynthesis)	NFYA7	4	665-686	Y	437.663	677	20	20	0	0.0259059	.\4_T_Plot\zjhD1\TRINITY_DN46176_c0_g1--677--miR169f_degradome.jpg
miR169f	CAGCCAAGGATGACTTGCCGA	TRINITY_DN55120_c1_g5	PREDICTED: nuclear transcription factor Y subunit A-10-like isoform X1 [Juglans regia]	GO:0003677(DNA binding);GO:0003700(transcription factor activity, sequence-specific DNA binding);GO:0005634(nucleus);GO:0006351(transcription, DNA-templated);GO:0006355(regulation of transcription, DNA-templated);GO:0009567(double fertilization forming a zygote and endosperm);GO:0016602(CCAAT-binding factor complex)	-	NFYA2	4	1588-1608	Y	350.131	1599	16	16	2	0.928528	.\4_T_Plot\zjhD1\TRINITY_DN55120_c1_g5--1599--miR169f_degradome.jpg
miR169f	CAGCCAAGGATGACTTGCCGA	TRINITY_DN56940_c0_g2	-	-	-	-	4	166-186	Y	1466.17	177	67	67	0	0.0259059	.\4_T_Plot\zjhD1\TRINITY_DN56940_c0_g2--177--miR169f_degradome.jpg
miR169g-5p	AGAGAGAGTGGAGTTGAGCC	TRINITY_DN49405_c2_g1	PREDICTED: ADP-ribosylation factor 2 isoform X1 [Nicotiana tomentosiformis]	GO:0005886(plasma membrane);GO:0006810(transport);GO:0022857(transmembrane transporter activity)	ko04144(Endocytosis)	Os01g0813400	4	1137-1157	Y	310.012	1148	32	14.1667	2	0.999785	.\4_T_Plot\zjhD1\TRINITY_DN49405_c2_g1--1148--miR169g-5p_degradome.jpg
miR169h	TAGCCAAGAATGACTTGCCTG	TRINITY_DN46176_c0_g1	PREDICTED: nuclear transcription factor Y subunit A-1-like isoform X1 [Juglans regia]	GO:0003677(DNA binding);GO:0003700(transcription factor activity, sequence-specific DNA binding);GO:0005634(nucleus);GO:0006351(transcription, DNA-templated);GO:0006355(regulation of transcription, DNA-templated);GO:0016602(CCAAT-binding factor complex);GO:0045892(negative regulation of transcription, DNA-templated)	ko00970(Aminoacyl-tRNA biosynthesis)	NFYA7	2	666-686	Y	437.663	677	20	20	0	0.00821525	.\4_T_Plot\zjhD1\TRINITY_DN46176_c0_g1--677--miR169h_degradome.jpg
miR169h	TAGCCAAGAATGACTTGCCTG	TRINITY_DN55120_c1_g5	PREDICTED: nuclear transcription factor Y subunit A-10-like isoform X1 [Juglans regia]	GO:0003677(DNA binding);GO:0003700(transcription factor activity, sequence-specific DNA binding);GO:0005634(nucleus);GO:0006351(transcription, DNA-templated);GO:0006355(regulation of transcription, DNA-templated);GO:0009567(double fertilization forming a zygote and endosperm);GO:0016602(CCAAT-binding factor complex)	-	NFYA2	2.5	1540-1560	Y	656.495	1551	30	30	2	0.529445	.\4_T_Plot\zjhD1\TRINITY_DN55120_c1_g5--1551--miR169h_degradome.jpg
miR169h	TAGCCAAGAATGACTTGCCTG	TRINITY_DN56940_c0_g2	-	-	-	-	4	166-186	Y	1466.17	177	67	67	0	0.0259059	.\4_T_Plot\zjhD1\TRINITY_DN56940_c0_g2--177--miR169h_degradome.jpg
miR171a	TGATTGAGCCGTGCCAATATC	TRINITY_DN38227_c0_g7	PREDICTED: scarecrow-like protein 22 [Juglans regia]	GO:0003700(transcription factor activity, sequence-specific DNA binding);GO:0005634(nucleus);GO:0006355(regulation of transcription, DNA-templated);GO:0030154(cell differentiation);GO:0043565(sequence-specific DNA binding)	ko04075(Plant hormone signal transduction)	SCL6	1	1095-1115	Y	525.196	1106	24	24	2	0.85914	.\4_T_Plot\zjhD1\TRINITY_DN38227_c0_g7--1106--miR171a_degradome.jpg
miR171a	TGATTGAGCCGTGCCAATATC	TRINITY_DN43888_c0_g1	PREDICTED: scarecrow-like protein 27 [Juglans regia]	GO:0003700(transcription factor activity, sequence-specific DNA binding);GO:0005634(nucleus);GO:0006355(regulation of transcription, DNA-templated);GO:0010492(maintenance of shoot apical meristem identity);GO:0043565(sequence-specific DNA binding);GO:0048768(root hair cell tip growth);GO:0051301(cell division)	ko04075(Plant hormone signal transduction)	SCL6	1	770-790	Y	1137.92	781	52	52	2	0.85914	.\4_T_Plot\zjhD1\TRINITY_DN43888_c0_g1--781--miR171a_degradome.jpg
miR171b	TGATTGAGCCGTGCCAATATC	TRINITY_DN38227_c0_g7	PREDICTED: scarecrow-like protein 22 [Juglans regia]	GO:0003700(transcription factor activity, sequence-specific DNA binding);GO:0005634(nucleus);GO:0006355(regulation of transcription, DNA-templated);GO:0030154(cell differentiation);GO:0043565(sequence-specific DNA binding)	ko04075(Plant hormone signal transduction)	SCL6	1	1095-1115	Y	525.196	1106	24	24	2	0.85914	.\4_T_Plot\zjhD1\TRINITY_DN38227_c0_g7--1106--miR171b_degradome.jpg
miR171b	TGATTGAGCCGTGCCAATATC	TRINITY_DN43888_c0_g1	PREDICTED: scarecrow-like protein 27 [Juglans regia]	GO:0003700(transcription factor activity, sequence-specific DNA binding);GO:0005634(nucleus);GO:0006355(regulation of transcription, DNA-templated);GO:0010492(maintenance of shoot apical meristem identity);GO:0043565(sequence-specific DNA binding);GO:0048768(root hair cell tip growth);GO:0051301(cell division)	ko04075(Plant hormone signal transduction)	SCL6	1	770-790	Y	1137.92	781	52	52	2	0.85914	.\4_T_Plot\zjhD1\TRINITY_DN43888_c0_g1--781--miR171b_degradome.jpg
miR171c	TTGAGCCGCGCCAATATCACT	TRINITY_DN38227_c0_g7	PREDICTED: scarecrow-like protein 22 [Juglans regia]	GO:0003700(transcription factor activity, sequence-specific DNA binding);GO:0005634(nucleus);GO:0006355(regulation of transcription, DNA-templated);GO:0030154(cell differentiation);GO:0043565(sequence-specific DNA binding)	ko04075(Plant hormone signal transduction)	SCL6	1	1092-1112	Y	1312.99	1103	60	60	0	0.0193092	.\4_T_Plot\zjhD1\TRINITY_DN38227_c0_g7--1103--miR171c_degradome.jpg
miR171c	TTGAGCCGCGCCAATATCACT	TRINITY_DN43888_c0_g1	PREDICTED: scarecrow-like protein 27 [Juglans regia]	GO:0003700(transcription factor activity, sequence-specific DNA binding);GO:0005634(nucleus);GO:0006355(regulation of transcription, DNA-templated);GO:0010492(maintenance of shoot apical meristem identity);GO:0043565(sequence-specific DNA binding);GO:0048768(root hair cell tip growth);GO:0051301(cell division)	ko04075(Plant hormone signal transduction)	SCL6	1	767-787	Y	2341.5	778	107	107	0	0.0193092	.\4_T_Plot\zjhD1\TRINITY_DN43888_c0_g1--778--miR171c_degradome.jpg
miR171c	TTGAGCCGCGCCAATATCACT	TRINITY_DN50180_c0_g6	PREDICTED: protein LONGIFOLIA 1 [Juglans regia]	GO:0003674(molecular_function);GO:0005634(nucleus);GO:0008150(biological_process)	-	LNG1	4	877-896	Y	43.7663	887	2	2	2	0.794656	.\4_T_Plot\zjhD1\TRINITY_DN50180_c0_g6--887--miR171c_degradome.jpg
miR171c	TTGAGCCGCGCCAATATCACT	TRINITY_DN52516_c0_g3	PREDICTED: nodulation-signaling pathway 2 protein [Juglans regia]	GO:0003700(transcription factor activity, sequence-specific DNA binding);GO:0005634(nucleus);GO:0006355(regulation of transcription, DNA-templated);GO:0043565(sequence-specific DNA binding)	ko04075(Plant hormone signal transduction)	NSP2	3	479-499	Y	1422.41	490	65	65	0	0.00672661	.\4_T_Plot\zjhD1\TRINITY_DN52516_c0_g3--490--miR171c_degradome.jpg
miR171d	TGATTGAGCCGTGCCAATATCT	TRINITY_DN38227_c0_g7	PREDICTED: scarecrow-like protein 22 [Juglans regia]	GO:0003700(transcription factor activity, sequence-specific DNA binding);GO:0005634(nucleus);GO:0006355(regulation of transcription, DNA-templated);GO:0030154(cell differentiation);GO:0043565(sequence-specific DNA binding)	ko04075(Plant hormone signal transduction)	SCL6	1.5	1094-1115	Y	525.196	1106	24	24	2	0.836218	.\4_T_Plot\zjhD1\TRINITY_DN38227_c0_g7--1106--miR171d_degradome.jpg
miR171d	TGATTGAGCCGTGCCAATATCT	TRINITY_DN43888_c0_g1	PREDICTED: scarecrow-like protein 27 [Juglans regia]	GO:0003700(transcription factor activity, sequence-specific DNA binding);GO:0005634(nucleus);GO:0006355(regulation of transcription, DNA-templated);GO:0010492(maintenance of shoot apical meristem identity);GO:0043565(sequence-specific DNA binding);GO:0048768(root hair cell tip growth);GO:0051301(cell division)	ko04075(Plant hormone signal transduction)	SCL6	1.5	769-790	Y	1137.92	781	52	52	2	0.836218	.\4_T_Plot\zjhD1\TRINITY_DN43888_c0_g1--781--miR171d_degradome.jpg
miR171e	TTGAGCCGTGCCAATATCACA	TRINITY_DN38227_c0_g7	PREDICTED: scarecrow-like protein 22 [Juglans regia]	GO:0003700(transcription factor activity, sequence-specific DNA binding);GO:0005634(nucleus);GO:0006355(regulation of transcription, DNA-templated);GO:0030154(cell differentiation);GO:0043565(sequence-specific DNA binding)	ko04075(Plant hormone signal transduction)	SCL6	3	1092-1112	Y	1312.99	1103	60	60	0	0.0200444	.\4_T_Plot\zjhD1\TRINITY_DN38227_c0_g7--1103--miR171e_degradome.jpg
miR171e	TTGAGCCGTGCCAATATCACA	TRINITY_DN43888_c0_g1	PREDICTED: scarecrow-like protein 27 [Juglans regia]	GO:0003700(transcription factor activity, sequence-specific DNA binding);GO:0005634(nucleus);GO:0006355(regulation of transcription, DNA-templated);GO:0010492(maintenance of shoot apical meristem identity);GO:0043565(sequence-specific DNA binding);GO:0048768(root hair cell tip growth);GO:0051301(cell division)	ko04075(Plant hormone signal transduction)	SCL6	3	767-787	Y	2341.5	778	107	107	0	0.0200444	.\4_T_Plot\zjhD1\TRINITY_DN43888_c0_g1--778--miR171e_degradome.jpg
miR171e	TTGAGCCGTGCCAATATCACA	TRINITY_DN52516_c0_g3	PREDICTED: nodulation-signaling pathway 2 protein [Juglans regia]	GO:0003700(transcription factor activity, sequence-specific DNA binding);GO:0005634(nucleus);GO:0006355(regulation of transcription, DNA-templated);GO:0043565(sequence-specific DNA binding)	ko04075(Plant hormone signal transduction)	NSP2	4	479-499	Y	1422.41	490	65	65	0	0.010444	.\4_T_Plot\zjhD1\TRINITY_DN52516_c0_g3--490--miR171e_degradome.jpg
miR171f	CGAGCCGAACCAATATCACTC	TRINITY_DN52516_c0_g3	PREDICTED: nodulation-signaling pathway 2 protein [Juglans regia]	GO:0003700(transcription factor activity, sequence-specific DNA binding);GO:0005634(nucleus);GO:0006355(regulation of transcription, DNA-templated);GO:0043565(sequence-specific DNA binding)	ko04075(Plant hormone signal transduction)	NSP2	1	478-498	Y	831.56	489	38	38	2	0.624687	.\4_T_Plot\zjhD1\TRINITY_DN52516_c0_g3--489--miR171f_degradome.jpg
miR171g	TTGAGCCGCGTCAATATCTCC	TRINITY_DN38227_c0_g7	PREDICTED: scarecrow-like protein 22 [Juglans regia]	GO:0003700(transcription factor activity, sequence-specific DNA binding);GO:0005634(nucleus);GO:0006355(regulation of transcription, DNA-templated);GO:0030154(cell differentiation);GO:0043565(sequence-specific DNA binding)	ko04075(Plant hormone signal transduction)	SCL6	2.5	1092-1112	Y	1312.99	1103	60	60	0	0.0148866	.\4_T_Plot\zjhD1\TRINITY_DN38227_c0_g7--1103--miR171g_degradome.jpg
miR171g	TTGAGCCGCGTCAATATCTCC	TRINITY_DN43888_c0_g1	PREDICTED: scarecrow-like protein 27 [Juglans regia]	GO:0003700(transcription factor activity, sequence-specific DNA binding);GO:0005634(nucleus);GO:0006355(regulation of transcription, DNA-templated);GO:0010492(maintenance of shoot apical meristem identity);GO:0043565(sequence-specific DNA binding);GO:0048768(root hair cell tip growth);GO:0051301(cell division)	ko04075(Plant hormone signal transduction)	SCL6	2.5	767-787	Y	2341.5	778	107	107	0	0.0148866	.\4_T_Plot\zjhD1\TRINITY_DN43888_c0_g1--778--miR171g_degradome.jpg
miR171g	TTGAGCCGCGTCAATATCTCC	TRINITY_DN49110_c0_g4	PREDICTED: uncharacterized protein LOC109020114 [Juglans regia]	GO:0005737(cytoplasm);GO:0006950(response to stress);GO:0016787(hydrolase activity)	-	-	4	436-457	Y	109.416	448	5	5	2	0.410033	.\4_T_Plot\zjhD1\TRINITY_DN49110_c0_g4--448--miR171g_degradome.jpg
miR172a	AGAATCTTGATGATGCTGCTT	TRINITY_DN46006_c0_g2	PREDICTED: AP2-like ethylene-responsive transcription factor TOE3 isoform X1 [Juglans regia]	GO:0003677(DNA binding);GO:0003700(transcription factor activity, sequence-specific DNA binding);GO:0005634(nucleus);GO:0006351(transcription, DNA-templated);GO:0006355(regulation of transcription, DNA-templated);GO:0009908(flower development);GO:0010073(meristem maintenance);GO:0010093(specification of floral organ identity);GO:0019953(sexual reproduction);GO:0030154(cell differentiation);GO:004…	-	AP2	3	542-562	Y	328.248	553	15	15	2	0.492601	.\4_T_Plot\zjhD1\TRINITY_DN46006_c0_g2--553--miR172a_degradome.jpg
miR172a	AGAATCTTGATGATGCTGCTT	TRINITY_DN46281_c0_g1	PREDICTED: ethylene-responsive transcription factor RAP2-7-like [Juglans regia]	GO:0003677(DNA binding);GO:0003700(transcription factor activity, sequence-specific DNA binding);GO:0005634(nucleus);GO:0006351(transcription, DNA-templated);GO:0006355(regulation of transcription, DNA-templated);GO:0009908(flower development);GO:0010073(meristem maintenance);GO:0010093(specification of floral organ identity);GO:0019953(sexual reproduction);GO:0030154(cell differentiation);GO:004…	-	RAP2-7	4	2183-2203	Y	131.299	2194	6	6	2	0.975123	.\4_T_Plot\zjhD1\TRINITY_DN46281_c0_g1--2194--miR172a_degradome.jpg
miR172a	AGAATCTTGATGATGCTGCTT	TRINITY_DN46378_c0_g3	unnamed protein product, partial [Vitis vinifera]	GO:0005515(protein binding);GO:0005516(calmodulin binding);GO:0005634(nucleus);GO:0005886(plasma membrane);GO:0030414(peptidase inhibitor activity);GO:0042742(defense response to bacterium)	-	-	4	331-352	Y	21.8832	343	1	1	4	0.975222	.\4_T_Plot\zjhD1\TRINITY_DN46378_c0_g3--343--miR172a_degradome.jpg
miR172a-5p	GCAGCATCATTAAGATTCAC	TRINITY_DN43816_c0_g3	PREDICTED: phosphoglycerate mutase-like protein 4 [Juglans regia]	GO:0005829(cytosol);GO:0016791(phosphatase activity)	ko01200(Carbon metabolism);ko01230(Biosynthesis of amino acids);ko00010(Glycolysis / Gluconeogenesis);ko00260(Glycine, serine and threonine metabolism)	At3g50520	3.5	295-314	Y	109.416	305	5	5	2	0.995607	.\4_T_Plot\zjhD1\TRINITY_DN43816_c0_g3--305--miR172a-5p_degradome.jpg
miR172a-5p	GCAGCATCATTAAGATTCAC	TRINITY_DN47713_c0_g2	PREDICTED: ADP-ribosylation factor 1 [Prunus mume]	GO:0005515(protein binding);GO:0005525(GTP binding);GO:0005794(Golgi apparatus);GO:0005795(Golgi stack);GO:0005886(plasma membrane);GO:0007264(small GTPase mediated signal transduction);GO:0015031(protein transport);GO:0016020(membrane);GO:0016192(vesicle-mediated transport);GO:0046686(response to cadmium ion)	ko04144(Endocytosis)	ARF1	3	492-510	Y	43.7663	501	2	2	2	0.492601	.\4_T_Plot\zjhD1\TRINITY_DN47713_c0_g2--501--miR172a-5p_degradome.jpg
miR172a-5p	GCAGCATCATTAAGATTCAC	TRINITY_DN51913_c0_g3	PREDICTED: probable galacturonosyltransferase 4 isoform X1 [Juglans regia]	GO:0000139(Golgi membrane);GO:0005794(Golgi apparatus);GO:0016021(integral component of membrane);GO:0016051(carbohydrate biosynthetic process);GO:0016757(transferase activity, transferring glycosyl groups);GO:0045489(pectin biosynthetic process);GO:0047262(polygalacturonate 4-alpha-galacturonosyltransferase activity);GO:0071555(cell wall organization)	ko00500(Starch and sucrose metabolism);ko00520(Amino sugar and nucleotide sugar metabolism)	GAUT4	3.5	1112-1131	Y	65.6495	1122	3	3	2	0.995607	.\4_T_Plot\zjhD1\TRINITY_DN51913_c0_g3--1122--miR172a-5p_degradome.jpg
miR172a-5p	GCAGCATCATTAAGATTCAC	TRINITY_DN53509_c0_g4	PREDICTED: phosphatidylcholine transfer protein-like isoform X2 [Juglans regia]	GO:0005739(mitochondrion);GO:0008150(biological_process);GO:0008289(lipid binding);GO:0016021(integral component of membrane)	-	-	3.5	1700-1718	Y	21.8832	1710	1	1	4	0.995632	.\4_T_Plot\zjhD1\TRINITY_DN53509_c0_g4--1710--miR172a-5p_degradome.jpg
miR172b	GGAATCTTGATGATGCTGCAT	TRINITY_DN46281_c0_g1	PREDICTED: ethylene-responsive transcription factor RAP2-7-like [Juglans regia]	GO:0003677(DNA binding);GO:0003700(transcription factor activity, sequence-specific DNA binding);GO:0005634(nucleus);GO:0006351(transcription, DNA-templated);GO:0006355(regulation of transcription, DNA-templated);GO:0009908(flower development);GO:0010073(meristem maintenance);GO:0010093(specification of floral organ identity);GO:0019953(sexual reproduction);GO:0030154(cell differentiation);GO:004…	-	RAP2-7	2	2183-2203	Y	131.299	2194	6	6	2	0.809567	.\4_T_Plot\zjhD1\TRINITY_DN46281_c0_g1--2194--miR172b_degradome.jpg
miR172b	GGAATCTTGATGATGCTGCAT	TRINITY_DN46006_c0_g2	PREDICTED: AP2-like ethylene-responsive transcription factor TOE3 isoform X1 [Juglans regia]	GO:0003677(DNA binding);GO:0003700(transcription factor activity, sequence-specific DNA binding);GO:0005634(nucleus);GO:0006351(transcription, DNA-templated);GO:0006355(regulation of transcription, DNA-templated);GO:0009908(flower development);GO:0010073(meristem maintenance);GO:0010093(specification of floral organ identity);GO:0019953(sexual reproduction);GO:0030154(cell differentiation);GO:004…	-	AP2	2.5	542-562	Y	328.248	553	15	15	2	0.529445	.\4_T_Plot\zjhD1\TRINITY_DN46006_c0_g2--553--miR172b_degradome.jpg
miR172b-5p	CAGCATCATCAAGATTCACAA	TRINITY_DN37399_c0_g1	PREDICTED: receptor-like serine/threonine-protein kinase SD1-8 [Juglans regia]	GO:0004674(protein serine/threonine kinase activity);GO:0005886(plasma membrane);GO:0006468(protein phosphorylation);GO:0006952(defense response);GO:0009506(plasmodesma);GO:0031625(ubiquitin protein ligase binding)	ko00500(Starch and sucrose metabolism);ko00460(Cyanoamino acid metabolism);ko00940(Phenylpropanoid biosynthesis)	SD18	4	1364-1383	Y	306.364	1374	14	14	2	0.998951	.\4_T_Plot\zjhD1\TRINITY_DN37399_c0_g1--1374--miR172b-5p_degradome.jpg
miR172b-5p	CAGCATCATCAAGATTCACAA	TRINITY_DN40488_c0_g4	PREDICTED: BSD domain-containing protein 1 [Juglans regia]	GO:0003674(molecular_function);GO:0005737(cytoplasm);GO:0008150(biological_process)	-	-	3.5	817-836	Y	306.364	827	14	14	2	0.836218	.\4_T_Plot\zjhD1\TRINITY_DN40488_c0_g4--827--miR172b-5p_degradome.jpg
miR172b-5p	CAGCATCATCAAGATTCACAA	TRINITY_DN47078_c1_g5	PREDICTED: chaperonin CPN60-2, mitochondrial [Citrus sinensis]	GO:0005507(copper ion binding);GO:0005524(ATP binding);GO:0005739(mitochondrion);GO:0005759(mitochondrial matrix);GO:0005774(vacuolar membrane);GO:0005794(Golgi apparatus);GO:0005829(cytosol);GO:0007005(mitochondrion organization);GO:0009408(response to heat);GO:0022626(cytosolic ribosome);GO:0042026(protein refolding);GO:0046686(response to cadmium ion);GO:0051131(chaperone-mediated protein comp…	ko03018(RNA dkoadation)	CPN60-2	4	1109-1129	Y	481.43	1120	22	22	2	0.998951	.\4_T_Plot\zjhD1\TRINITY_DN47078_c1_g5--1120--miR172b-5p_degradome.jpg
miR172b-5p	CAGCATCATCAAGATTCACAA	TRINITY_DN47713_c0_g2	PREDICTED: ADP-ribosylation factor 1 [Prunus mume]	GO:0005515(protein binding);GO:0005525(GTP binding);GO:0005794(Golgi apparatus);GO:0005795(Golgi stack);GO:0005886(plasma membrane);GO:0007264(small GTPase mediated signal transduction);GO:0015031(protein transport);GO:0016020(membrane);GO:0016192(vesicle-mediated transport);GO:0046686(response to cadmium ion)	ko04144(Endocytosis)	ARF1	4	490-509	Y	87.5327	500	4	4	2	0.998951	.\4_T_Plot\zjhD1\TRINITY_DN47713_c0_g2--500--miR172b-5p_degradome.jpg
miR1919b	AGCGAGTCATCTGTGACAGG	TRINITY_DN39499_c1_g6	-	-	-	-	4	149-167	Y	10.9416	159	1	0.5	4	0.92873	.\4_T_Plot\zjhD1\TRINITY_DN39499_c1_g6--159--miR1919b_degradome.jpg
miR2111a	TAATCTGCATCCTGAGGTTTA	TRINITY_DN53737_c0_g7	PREDICTED: F-box/kelch-repeat protein At3g27150 [Juglans regia]	GO:0004842(ubiquitin-protein transferase activity);GO:0031463(Cul3-RING ubiquitin ligase complex)	-	At3g27150	1.5	398-418	Y	43.7663	409	2	2	2	0.595301	.\4_T_Plot\zjhD1\TRINITY_DN53737_c0_g7--409--miR2111a_degradome.jpg
miR2111a	TAATCTGCATCCTGAGGTTTA	TRINITY_DN53084_c0_g4	PREDICTED: structural maintenance of chromosomes protein 3 [Juglans regia]	GO:0000775(chromosome, centromeric region);GO:0000785(chromatin);GO:0003682(chromatin binding);GO:0005524(ATP binding);GO:0005634(nucleus);GO:0005737(cytoplasm);GO:0005819(spindle);GO:0006281(DNA repair);GO:0007059(chromosome segregation);GO:0007062(sister chromatid cohesion);GO:0007064(mitotic sister chromatid cohesion);GO:0008278(cohesin complex);GO:0008280(cohesin core heterodimer);GO:0009506(…	ko00053(Ascorbate and aldarate metabolism);ko00480(Glutkoione metabolism)	SMC3	4	3460-3480	Y	21.8832	3471	1	1	4	0.652333	.\4_T_Plot\zjhD1\TRINITY_DN53084_c0_g4--3471--miR2111a_degradome.jpg
miR2950a-3p	TGGTGTGCATGGGATGGAATA	TRINITY_DN46380_c0_g3	PREDICTED: uncharacterized protein LOC103946619 [Pyrus x bretschneideri]	GO:0004497(monooxygenase activity);GO:0044550(secondary metabolite biosynthetic process)	ko00906(Carotenoid biosynthesis)	hpxO	4	1022-1041	Y	175.065	1033	8	8	2	0.410033	.\4_T_Plot\zjhD1\TRINITY_DN46380_c0_g3--1033--miR2950a-3p_degradome.jpg
miR2950a-5p	TTCCATCTCTTGCACACTGGA	TRINITY_DN55145_c0_g1	PREDICTED: cyclin-L1-1-like isoform X1 [Juglans regia]	GO:0000307(cyclin-dependent protein kinase holoenzyme complex);GO:0005634(nucleus);GO:0016538(cyclin-dependent protein serine/threonine kinase regulator activity);GO:0045737(positive regulation of cyclin-dependent protein serine/threonine kinase activity);GO:0045944(positive regulation of transcription from RNA polymerase II promoter);GO:1901409(positive regulation of phosphorylation of RNA polym…	-	CYCL1-1	3.5	575-594	Y	21.8832	586	1	1	4	0.836536	.\4_T_Plot\zjhD1\TRINITY_DN55145_c0_g1--586--miR2950a-5p_degradome.jpg
miR319a	TTGGACTGAAGGGAGCTCCC	TRINITY_DN44213_c1_g21	PREDICTED: transcription factor TCP4-like [Juglans regia]	GO:0003677(DNA binding);GO:0003700(transcription factor activity, sequence-specific DNA binding);GO:0005515(protein binding);GO:0005634(nucleus);GO:0006351(transcription, DNA-templated);GO:0006355(regulation of transcription, DNA-templated);GO:0009793(embryo development ending in seed dormancy);GO:0009965(leaf morphogenesis);GO:0030154(cell differentiation);GO:0045962(positive regulation of devel…	-	TCP4	4	676-695	Y	240.715	686	11	11	2	0.928528	.\4_T_Plot\zjhD1\TRINITY_DN44213_c1_g21--686--miR319a_degradome.jpg
miR319a	TTGGACTGAAGGGAGCTCCC	TRINITY_DN50140_c0_g3	PREDICTED: transcription factor TCP2-like [Juglans regia]	GO:0003677(DNA binding);GO:0003700(transcription factor activity, sequence-specific DNA binding);GO:0005515(protein binding);GO:0005634(nucleus);GO:0006351(transcription, DNA-templated);GO:0006355(regulation of transcription, DNA-templated);GO:0009637(response to blue light);GO:0009965(leaf morphogenesis);GO:0030154(cell differentiation);GO:0045962(positive regulation of development, heterochroni…	-	TCP2	3.5	1358-1377	Y	1925.72	1368	88	88	0	0.00598145	.\4_T_Plot\zjhD1\TRINITY_DN50140_c0_g3--1368--miR319a_degradome.jpg
miR319a	TTGGACTGAAGGGAGCTCCC	TRINITY_DN54180_c0_g2	PREDICTED: acyl-CoA-binding domain-containing protein 4 [Juglans regia]	GO:0005634(nucleus);GO:0005737(cytoplasm);GO:0005829(cytosol);GO:0008150(biological_process)	-	ACBP4	4	1510-1529	Y	21.8832	1520	1	1	4	0.92873	.\4_T_Plot\zjhD1\TRINITY_DN54180_c0_g2--1520--miR319a_degradome.jpg
miR319a	TTGGACTGAAGGGAGCTCCC	TRINITY_DN53557_c0_g3	PREDICTED: transcription factor TCP4-like [Juglans regia]	GO:0003677(DNA binding);GO:0003700(transcription factor activity, sequence-specific DNA binding);GO:0005515(protein binding);GO:0005634(nucleus);GO:0006351(transcription, DNA-templated);GO:0006355(regulation of transcription, DNA-templated);GO:0009793(embryo development ending in seed dormancy);GO:0009965(leaf morphogenesis);GO:0030154(cell differentiation);GO:0045962(positive regulation of devel…	-	TCP4	4	1507-1526	Y	240.715	1517	11	11	2	0.928528	.\4_T_Plot\zjhD1\TRINITY_DN53557_c0_g3--1517--miR319a_degradome.jpg
miR319a-5p	GAGCTTTCTTCAGTCCACTC	TRINITY_DN52516_c0_g1	hypothetical protein CISIN_1g025092mg [Citrus sinensis]	GO:0005509(calcium ion binding);GO:0008266(poly(U) RNA binding);GO:0009507(chloroplast);GO:0009534(chloroplast thylakoid);GO:0009535(chloroplast thylakoid membrane);GO:0009543(chloroplast thylakoid lumen);GO:0009570(chloroplast stroma);GO:0009579(thylakoid);GO:0009654(photosystem II oxygen evolving complex);GO:0009941(chloroplast envelope);GO:0019684(photosynthesis, light reaction);GO:0019898(ext…	ko00195(Photosynthesis)	PSBP1	4	1074-1093	Y	131.299	1084	6	6	3	0.46933	.\4_T_Plot\zjhD1\TRINITY_DN52516_c0_g1--1084--miR319a-5p_degradome.jpg
miR319a-5p	GAGCTTTCTTCAGTCCACTC	TRINITY_DN56504_c1_g2	PREDICTED: dof zinc finger protein DOF2.5-like [Juglans regia]	GO:0003677(DNA binding);GO:0003700(transcription factor activity, sequence-specific DNA binding);GO:0005634(nucleus);GO:0006351(transcription, DNA-templated);GO:0006355(regulation of transcription, DNA-templated);GO:0009639(response to red or far red light);GO:0009845(seed germination);GO:0044212(transcription regulatory region DNA binding);GO:0046872(metal ion binding)	ko04712(Circadian rhythm - plant)	DOF3.7	4	228-247	Y	21.8832	238	1	1	4	0.991385	.\4_T_Plot\zjhD1\TRINITY_DN56504_c1_g2--238--miR319a-5p_degradome.jpg
miR319b	TTGGACTGAAGGGAGCTCCC	TRINITY_DN44213_c1_g21	PREDICTED: transcription factor TCP4-like [Juglans regia]	GO:0003677(DNA binding);GO:0003700(transcription factor activity, sequence-specific DNA binding);GO:0005515(protein binding);GO:0005634(nucleus);GO:0006351(transcription, DNA-templated);GO:0006355(regulation of transcription, DNA-templated);GO:0009793(embryo development ending in seed dormancy);GO:0009965(leaf morphogenesis);GO:0030154(cell differentiation);GO:0045962(positive regulation of devel…	-	TCP4	4	676-695	Y	240.715	686	11	11	2	0.928528	.\4_T_Plot\zjhD1\TRINITY_DN44213_c1_g21--686--miR319b_degradome.jpg
miR319b	TTGGACTGAAGGGAGCTCCC	TRINITY_DN50140_c0_g3	PREDICTED: transcription factor TCP2-like [Juglans regia]	GO:0003677(DNA binding);GO:0003700(transcription factor activity, sequence-specific DNA binding);GO:0005515(protein binding);GO:0005634(nucleus);GO:0006351(transcription, DNA-templated);GO:0006355(regulation of transcription, DNA-templated);GO:0009637(response to blue light);GO:0009965(leaf morphogenesis);GO:0030154(cell differentiation);GO:0045962(positive regulation of development, heterochroni…	-	TCP2	3.5	1358-1377	Y	1925.72	1368	88	88	0	0.00598145	.\4_T_Plot\zjhD1\TRINITY_DN50140_c0_g3--1368--miR319b_degradome.jpg
miR319b	TTGGACTGAAGGGAGCTCCC	TRINITY_DN54180_c0_g2	PREDICTED: acyl-CoA-binding domain-containing protein 4 [Juglans regia]	GO:0005634(nucleus);GO:0005737(cytoplasm);GO:0005829(cytosol);GO:0008150(biological_process)	-	ACBP4	4	1510-1529	Y	21.8832	1520	1	1	4	0.92873	.\4_T_Plot\zjhD1\TRINITY_DN54180_c0_g2--1520--miR319b_degradome.jpg
miR319b	TTGGACTGAAGGGAGCTCCC	TRINITY_DN53557_c0_g3	PREDICTED: transcription factor TCP4-like [Juglans regia]	GO:0003677(DNA binding);GO:0003700(transcription factor activity, sequence-specific DNA binding);GO:0005515(protein binding);GO:0005634(nucleus);GO:0006351(transcription, DNA-templated);GO:0006355(regulation of transcription, DNA-templated);GO:0009793(embryo development ending in seed dormancy);GO:0009965(leaf morphogenesis);GO:0030154(cell differentiation);GO:0045962(positive regulation of devel…	-	TCP4	4	1507-1526	Y	240.715	1517	11	11	2	0.928528	.\4_T_Plot\zjhD1\TRINITY_DN53557_c0_g3--1517--miR319b_degradome.jpg
miR3627a	TGTCGCAGGAGAGATGGTGCT	TRINITY_DN39188_c0_g5	PREDICTED: uncharacterized endoplasmic reticulum membrane protein YGL010W-like [Juglans regia]	GO:0003674(molecular_function);GO:0008150(biological_process);GO:0009507(chloroplast);GO:0016021(integral component of membrane)	-	SPAC16E8.02	4	566-585	Y	196.949	577	9	9	2	0.794656	.\4_T_Plot\zjhD1\TRINITY_DN39188_c0_g5--577--miR3627a_degradome.jpg
miR3627a	TGTCGCAGGAGAGATGGTGCT	TRINITY_DN41298_c1_g6	-	-	-	-	4	148-168	Y	21.8832	159	1	1	4	0.795005	.\4_T_Plot\zjhD1\TRINITY_DN41298_c1_g6--159--miR3627a_degradome.jpg
miR3627a	TGTCGCAGGAGAGATGGTGCT	TRINITY_DN53948_c0_g4	PREDICTED: calcium-transporting ATPase 8, plasma membrane-type-like [Juglans regia]	GO:0005388(calcium-transporting ATPase activity);GO:0005887(integral component of plasma membrane);GO:0043231(intracellular membrane-bounded organelle)	ko03018(RNA dkoadation)	ACA10	1.5	331-351	Y	109.416	342	5	5	2	0.595301	.\4_T_Plot\zjhD1\TRINITY_DN53948_c0_g4--342--miR3627a_degradome.jpg
miR390a	AAGCTCAGGAGGGATAGCGCC	TRINITY_DN42596_c0_g2	-	-	-	-	2	158-178	Y	21.8832	169	1	1	4	0.809905	.\4_T_Plot\zjhD1\TRINITY_DN42596_c0_g2--169--miR390a_degradome.jpg
miR390a	AAGCTCAGGAGGGATAGCGCC	TRINITY_DN54042_c0_g3	PREDICTED: probable LRR receptor-like serine/threonine-protein kinase RFK1 isoform X3 [Juglans regia]	GO:0004674(protein serine/threonine kinase activity);GO:0005886(plasma membrane)	-	RKF1	2	993-1013	Y	21.8832	1004	1	1	4	0.809905	.\4_T_Plot\zjhD1\TRINITY_DN54042_c0_g3--1004--miR390a_degradome.jpg
miR391a-5p	CGCAGGAGAGATGGCGCCGT	TRINITY_DN41298_c1_g6	-	-	-	-	4	145-165	Y	21.8832	156	1	1	4	0.795005	.\4_T_Plot\zjhD1\TRINITY_DN41298_c1_g6--156--miR391a-5p_degradome.jpg
miR391a-5p	CGCAGGAGAGATGGCGCCGT	TRINITY_DN53948_c0_g4	PREDICTED: calcium-transporting ATPase 8, plasma membrane-type-like [Juglans regia]	GO:0005388(calcium-transporting ATPase activity);GO:0005887(integral component of plasma membrane);GO:0043231(intracellular membrane-bounded organelle)	ko03018(RNA dkoadation)	ACA10	0.5	329-348	Y	131.299	339	6	6	2	0.651939	.\4_T_Plot\zjhD1\TRINITY_DN53948_c0_g4--339--miR391a-5p_degradome.jpg
miR391a-5p	CGCAGGAGAGATGGCGCCGT	TRINITY_DN53697_c0_g1	PREDICTED: casein kinase I-like [Ziziphus jujuba]	GO:0004674(protein serine/threonine kinase activity);GO:0005634(nucleus);GO:0005737(cytoplasm);GO:0006897(endocytosis);GO:0008360(regulation of cell shape);GO:0016055(Wnt signaling pathway);GO:0018105(peptidyl-serine phosphorylation)	-	CKL3	4	430-448	Y	21.8832	439	1	1	4	0.795005	.\4_T_Plot\zjhD1\TRINITY_DN53697_c0_g1--439--miR391a-5p_degradome.jpg
miR393b	TCCAAAGGGATCGCATTGATC	TRINITY_DN38778_c0_g9	PREDICTED: protein TRANSPORT INHIBITOR RESPONSE 1-like [Juglans regia]	GO:0000822(inositol hexakisphosphate binding);GO:0009734(auxin-activated signaling pathway)	ko04075(Plant hormone signal transduction)	TIR1	1	1633-1652	Y	8446.9	1643	386	386	0	0.00970167	.\4_T_Plot\zjhD1\TRINITY_DN38778_c0_g9--1643--miR393b_degradome.jpg
miR393b	TCCAAAGGGATCGCATTGATC	TRINITY_DN38641_c0_g5	PREDICTED: protein AUXIN SIGNALING F-BOX 2-like [Juglans regia]	GO:0000822(inositol hexakisphosphate binding);GO:0009734(auxin-activated signaling pathway)	ko04075(Plant hormone signal transduction)	AFB2	2	1581-1601	Y	3807.67	1592	174	174	0	0.00821525	.\4_T_Plot\zjhD1\TRINITY_DN38641_c0_g5--1592--miR393b_degradome.jpg
miR393c	TCCAAAGGGATCGCATTGATTT	TRINITY_DN38641_c0_g5	PREDICTED: protein AUXIN SIGNALING F-BOX 2-like [Juglans regia]	GO:0000822(inositol hexakisphosphate binding);GO:0009734(auxin-activated signaling pathway)	ko04075(Plant hormone signal transduction)	AFB2	1.5	1580-1601	Y	3807.67	1592	174	174	0	0.00895874	.\4_T_Plot\zjhD1\TRINITY_DN38641_c0_g5--1592--miR393c_degradome.jpg
miR393c	TCCAAAGGGATCGCATTGATTT	TRINITY_DN38778_c0_g9	PREDICTED: protein TRANSPORT INHIBITOR RESPONSE 1-like [Juglans regia]	GO:0000822(inositol hexakisphosphate binding);GO:0009734(auxin-activated signaling pathway)	ko04075(Plant hormone signal transduction)	TIR1	2	1631-1652	Y	8446.9	1643	386	386	0	0.00821525	.\4_T_Plot\zjhD1\TRINITY_DN38778_c0_g9--1643--miR393c_degradome.jpg
miR394a	TTGGCATTCTGTCCACCTCC	TRINITY_DN38167_c0_g2	-	-	-	-	4	698-717	Y	2647.86	708	121	121	2	0.928528	.\4_T_Plot\zjhD1\TRINITY_DN38167_c0_g2--708--miR394a_degradome.jpg
miR394a	TTGGCATTCTGTCCACCTCC	TRINITY_DN40565_c1_g5	PREDICTED: F-box only protein 6 [Juglans regia]	GO:0004842(ubiquitin-protein transferase activity);GO:0010305(leaf vascular tissue pattern formation);GO:0010928(regulation of auxin mediated signaling pathway);GO:0019005(SCF ubiquitin ligase complex);GO:0031146(SCF-dependent proteasomal ubiquitin-dependent protein catabolic process);GO:0060776(simple leaf morphogenesis)	-	FBX6	1	137-156	Y	1575.59	147	72	72	0	0.00970167	.\4_T_Plot\zjhD1\TRINITY_DN40565_c1_g5--147--miR394a_degradome.jpg
miR394a	TTGGCATTCTGTCCACCTCC	TRINITY_DN41612_c0_g10	PREDICTED: uncharacterized protein LOC101302269 [Fragaria vesca subsp. vesca]	GO:0003674(molecular_function);GO:0005634(nucleus)	-	-	4	285-305	Y	109.416	295	5	5	2	0.928528	.\4_T_Plot\zjhD1\TRINITY_DN41612_c0_g10--295--miR394a_degradome.jpg
miR394b	TTTGGCATTCTGTCCACCTCC	TRINITY_DN40565_c1_g5	PREDICTED: F-box only protein 6 [Juglans regia]	GO:0004842(ubiquitin-protein transferase activity);GO:0010305(leaf vascular tissue pattern formation);GO:0010928(regulation of auxin mediated signaling pathway);GO:0019005(SCF ubiquitin ligase complex);GO:0031146(SCF-dependent proteasomal ubiquitin-dependent protein catabolic process);GO:0060776(simple leaf morphogenesis)	-	FBX6	1	137-157	Y	809.677	148	37	37	2	0.624687	.\4_T_Plot\zjhD1\TRINITY_DN40565_c1_g5--148--miR394b_degradome.jpg
miR394b	TTTGGCATTCTGTCCACCTCC	TRINITY_DN41612_c0_g10	PREDICTED: uncharacterized protein LOC101302269 [Fragaria vesca subsp. vesca]	GO:0003674(molecular_function);GO:0005634(nucleus)	-	-	4	285-306	Y	21.8832	296	1	1	4	0.795005	.\4_T_Plot\zjhD1\TRINITY_DN41612_c0_g10--296--miR394b_degradome.jpg
miR395b	CTGAAGCGTTTGGGGGAACCC	TRINITY_DN48018_c0_g5	PREDICTED: ATP sulfurylase 1, chloroplastic-like [Juglans regia]	GO:0000103(sulfate assimilation);GO:0004020(adenylylsulfate kinase activity)	ko00920(Sulfur metabolism);ko00230(Purine metabolism);ko00450(Selenocompound metabolism);ko00261(Monobactam biosynthesis)	APS1	2.5	505-525	Y	328.248	516	15	15	2	0.529445	.\4_T_Plot\zjhD1\TRINITY_DN48018_c0_g5--516--miR395b_degradome.jpg
miR395c	CTGAAGTGTTTGGAGGAACTC	TRINITY_DN48018_c0_g5	PREDICTED: ATP sulfurylase 1, chloroplastic-like [Juglans regia]	GO:0000103(sulfate assimilation);GO:0004020(adenylylsulfate kinase activity)	ko00920(Sulfur metabolism);ko00230(Purine metabolism);ko00450(Selenocompound metabolism);ko00261(Monobactam biosynthesis)	APS1	2	505-525	Y	328.248	516	15	15	2	0.563613	.\4_T_Plot\zjhD1\TRINITY_DN48018_c0_g5--516--miR395c_degradome.jpg
miR395c	CTGAAGTGTTTGGAGGAACTC	TRINITY_DN53325_c0_g2	PREDICTED: putative exopolyphosphatase isoform X2 [Citrus sinensis]	-	-	-	4	765-785	Y	21.8832	776	1	1	4	0.652333	.\4_T_Plot\zjhD1\TRINITY_DN53325_c0_g2--776--miR395c_degradome.jpg
miR396a	TTCCACAGCTTTCTTGAACTG	TRINITY_DN39992_c0_g7	Uncharacterized protein TCM_024890 [Theobroma cacao]	-	ko00785(Lipoic acid metabolism)	-	2.5	173-193	Y	372.014	184	17	17	0	0.00747121	.\4_T_Plot\zjhD1\TRINITY_DN39992_c0_g7--184--miR396a_degradome.jpg
miR396a	TTCCACAGCTTTCTTGAACTG	TRINITY_DN39145_c0_g4	PREDICTED: inactive TPR repeat-containing thioredoxin TTL3-like [Juglans regia]	GO:0005739(mitochondrion)	-	-	3.5	302-322	Y	87.5327	313	4	4	2	0.950972	.\4_T_Plot\zjhD1\TRINITY_DN39145_c0_g4--313--miR396a_degradome.jpg
miR396a	TTCCACAGCTTTCTTGAACTG	TRINITY_DN42808_c1_g4	PREDICTED: growth-regulating factor 7-like isoform X2 [Juglans regia]	GO:0005515(protein binding);GO:0005524(ATP binding);GO:0005634(nucleus);GO:0006351(transcription, DNA-templated);GO:0006355(regulation of transcription, DNA-templated);GO:0009624(response to nematode);GO:0048364(root development);GO:0048366(leaf development);GO:0061062(regulation of nematode larval development)	-	GRF4	3	501-522	Y	43.7663	512	2	2	2	0.966368	.\4_T_Plot\zjhD1\TRINITY_DN42808_c1_g4--512--miR396a_degradome.jpg
miR396a	TTCCACAGCTTTCTTGAACTG	TRINITY_DN42903_c2_g4	PREDICTED: growth-regulating factor 7-like [Juglans regia]	GO:0005515(protein binding);GO:0005524(ATP binding);GO:0005634(nucleus);GO:0006351(transcription, DNA-templated);GO:0006355(regulation of transcription, DNA-templated);GO:0009624(response to nematode);GO:0048364(root development);GO:0048366(leaf development);GO:0061062(regulation of nematode larval development)	-	GRF6	4	771-792	Y	656.495	782	30	30	0	0.0259059	.\4_T_Plot\zjhD1\TRINITY_DN42903_c2_g4--782--miR396a_degradome.jpg
miR396a	TTCCACAGCTTTCTTGAACTG	TRINITY_DN48685_c0_g6	PREDICTED: calcium-transporting ATPase 12, plasma membrane-type-like [Juglans regia]	GO:0005388(calcium-transporting ATPase activity);GO:0005887(integral component of plasma membrane);GO:0043231(intracellular membrane-bounded organelle)	ko00190(Oxidative phosphorylation)	ACA12	3	2043-2064	Y	21.8832	2055	1	1	4	0.966491	.\4_T_Plot\zjhD1\TRINITY_DN48685_c0_g6--2055--miR396a_degradome.jpg
miR396a	TTCCACAGCTTTCTTGAACTG	TRINITY_DN48381_c1_g4	PREDICTED: growth-regulating factor 9-like isoform X1 [Juglans regia]	GO:0005524(ATP binding);GO:0005634(nucleus);GO:0006351(transcription, DNA-templated);GO:0006355(regulation of transcription, DNA-templated);GO:0008285(negative regulation of cell proliferation);GO:0009624(response to nematode);GO:0044212(transcription regulatory region DNA binding);GO:0048364(root development);GO:0048366(leaf development);GO:0061062(regulation of nematode larval development)	-	GRF12	4	845-866	Y	2779.16	856	127	127	0	0.0259059	.\4_T_Plot\zjhD1\TRINITY_DN48381_c1_g4--856--miR396a_degradome.jpg
miR396a	TTCCACAGCTTTCTTGAACTG	TRINITY_DN54114_c0_g7	PREDICTED: growth-regulating factor 6-like isoform X2 [Juglans regia]	GO:0005515(protein binding);GO:0005524(ATP binding);GO:0005634(nucleus);GO:0006351(transcription, DNA-templated);GO:0006355(regulation of transcription, DNA-templated);GO:0009624(response to nematode);GO:0048364(root development);GO:0048366(leaf development);GO:0061062(regulation of nematode larval development)	-	GRF6	3.5	884-905	Y	131.299	895	6	6	2	0.950972	.\4_T_Plot\zjhD1\TRINITY_DN54114_c0_g7--895--miR396a_degradome.jpg
miR396a	TTCCACAGCTTTCTTGAACTG	TRINITY_DN54114_c0_g4	PREDICTED: LOW QUALITY PROTEIN: growth-regulating factor 1-like [Juglans regia]	GO:0005515(protein binding);GO:0005524(ATP binding);GO:0005634(nucleus);GO:0006351(transcription, DNA-templated);GO:0006355(regulation of transcription, DNA-templated);GO:0009624(response to nematode);GO:0048364(root development);GO:0048366(leaf development);GO:0061062(regulation of nematode larval development)	-	GRF1	3.5	996-1017	Y	1094.16	1007	50	50	0	0.0295516	.\4_T_Plot\zjhD1\TRINITY_DN54114_c0_g4--1007--miR396a_degradome.jpg
miR396a-3p	TTCAAGAAAGCTGTGGAAAAT	TRINITY_DN42013_c0_g5	PREDICTED: alpha-amylase [Vitis vinifera]	GO:0004556(alpha-amylase activity);GO:0005509(calcium ion binding);GO:0005576(extracellular region);GO:0005975(carbohydrate metabolic process);GO:0009737(response to abscisic acid);GO:0009739(response to gibberellin);GO:0048046(apoplast)	ko00500(Starch and sucrose metabolism)	AMY1.1	4	801-821	Y	21.8832	812	1	1	4	0.957977	.\4_T_Plot\zjhD1\TRINITY_DN42013_c0_g5--812--miR396a-3p_degradome.jpg
miR396a-3p	TTCAAGAAAGCTGTGGAAAAT	TRINITY_DN41558_c0_g9	PREDICTED: nuclear valosin-containing protein-like [Juglans regia]	GO:0005634(nucleus);GO:0008568(microtubule-severing ATPase activity);GO:0031122(cytoplasmic microtubule organization)	ko03013(RNA transport)	-	4	259-279	Y	21.8832	270	1	1	4	0.957977	.\4_T_Plot\zjhD1\TRINITY_DN41558_c0_g9--270--miR396a-3p_degradome.jpg
miR396b	TTCCACAGCTTTCTTGAACTT	TRINITY_DN39992_c0_g7	Uncharacterized protein TCM_024890 [Theobroma cacao]	-	ko00785(Lipoic acid metabolism)	-	3.5	173-193	Y	372.014	184	17	17	0	0.023712	.\4_T_Plot\zjhD1\TRINITY_DN39992_c0_g7--184--miR396b_degradome.jpg
miR396b	TTCCACAGCTTTCTTGAACTT	TRINITY_DN38690_c0_g2	PREDICTED: major antigen [Juglans regia]	GO:0005783(endoplasmic reticulum);GO:0016021(integral component of membrane)	-	-	4	643-662	Y	306.364	653	14	14	2	0.998951	.\4_T_Plot\zjhD1\TRINITY_DN38690_c0_g2--653--miR396b_degradome.jpg
miR396b	TTCCACAGCTTTCTTGAACTT	TRINITY_DN42903_c2_g4	PREDICTED: growth-regulating factor 7-like [Juglans regia]	GO:0005515(protein binding);GO:0005524(ATP binding);GO:0005634(nucleus);GO:0006351(transcription, DNA-templated);GO:0006355(regulation of transcription, DNA-templated);GO:0009624(response to nematode);GO:0048364(root development);GO:0048366(leaf development);GO:0061062(regulation of nematode larval development)	-	GRF6	3.5	771-792	Y	656.495	782	30	30	0	0.023712	.\4_T_Plot\zjhD1\TRINITY_DN42903_c2_g4--782--miR396b_degradome.jpg
miR396b	TTCCACAGCTTTCTTGAACTT	TRINITY_DN42808_c1_g4	PREDICTED: growth-regulating factor 7-like isoform X2 [Juglans regia]	GO:0005515(protein binding);GO:0005524(ATP binding);GO:0005634(nucleus);GO:0006351(transcription, DNA-templated);GO:0006355(regulation of transcription, DNA-templated);GO:0009624(response to nematode);GO:0048364(root development);GO:0048366(leaf development);GO:0061062(regulation of nematode larval development)	-	GRF4	4	501-522	Y	43.7663	512	2	2	2	0.998951	.\4_T_Plot\zjhD1\TRINITY_DN42808_c1_g4--512--miR396b_degradome.jpg
miR396b	TTCCACAGCTTTCTTGAACTT	TRINITY_DN48685_c0_g6	PREDICTED: calcium-transporting ATPase 12, plasma membrane-type-like [Juglans regia]	GO:0005388(calcium-transporting ATPase activity);GO:0005887(integral component of plasma membrane);GO:0043231(intracellular membrane-bounded organelle)	ko00190(Oxidative phosphorylation)	ACA12	2.5	2043-2064	Y	21.8832	2055	1	1	4	0.529825	.\4_T_Plot\zjhD1\TRINITY_DN48685_c0_g6--2055--miR396b_degradome.jpg
miR396b	TTCCACAGCTTTCTTGAACTT	TRINITY_DN48381_c1_g4	PREDICTED: growth-regulating factor 9-like isoform X1 [Juglans regia]	GO:0005524(ATP binding);GO:0005634(nucleus);GO:0006351(transcription, DNA-templated);GO:0006355(regulation of transcription, DNA-templated);GO:0008285(negative regulation of cell proliferation);GO:0009624(response to nematode);GO:0044212(transcription regulatory region DNA binding);GO:0048364(root development);GO:0048366(leaf development);GO:0061062(regulation of nematode larval development)	-	GRF12	3.5	845-866	Y	2779.16	856	127	127	0	0.023712	.\4_T_Plot\zjhD1\TRINITY_DN48381_c1_g4--856--miR396b_degradome.jpg
miR396b	TTCCACAGCTTTCTTGAACTT	TRINITY_DN48294_c0_g6	PREDICTED: cysteine proteinase COT44-like [Juglans regia]	GO:0004197(cysteine-type endopeptidase activity);GO:0005615(extracellular space);GO:0005764(lysosome);GO:0051603(proteolysis involved in cellular protein catabolic process)	ko04145(Phagosome)	RD21A	4	822-843	Y	21.8832	834	1	1	4	0.998959	.\4_T_Plot\zjhD1\TRINITY_DN48294_c0_g6--834--miR396b_degradome.jpg
miR396b	TTCCACAGCTTTCTTGAACTT	TRINITY_DN54114_c0_g7	PREDICTED: growth-regulating factor 6-like isoform X2 [Juglans regia]	GO:0005515(protein binding);GO:0005524(ATP binding);GO:0005634(nucleus);GO:0006351(transcription, DNA-templated);GO:0006355(regulation of transcription, DNA-templated);GO:0009624(response to nematode);GO:0048364(root development);GO:0048366(leaf development);GO:0061062(regulation of nematode larval development)	-	GRF6	4	884-905	Y	131.299	895	6	6	2	0.998951	.\4_T_Plot\zjhD1\TRINITY_DN54114_c0_g7--895--miR396b_degradome.jpg
miR396b	TTCCACAGCTTTCTTGAACTT	TRINITY_DN54114_c0_g4	PREDICTED: LOW QUALITY PROTEIN: growth-regulating factor 1-like [Juglans regia]	GO:0005515(protein binding);GO:0005524(ATP binding);GO:0005634(nucleus);GO:0006351(transcription, DNA-templated);GO:0006355(regulation of transcription, DNA-templated);GO:0009624(response to nematode);GO:0048364(root development);GO:0048366(leaf development);GO:0061062(regulation of nematode larval development)	-	GRF1	4	996-1017	Y	1094.16	1007	50	50	0	0.0659668	.\4_T_Plot\zjhD1\TRINITY_DN54114_c0_g4--1007--miR396b_degradome.jpg
miR396c-3p	GTTCAATAAAGCTGTGGGAAG	TRINITY_DN53115_c0_g4	PREDICTED: MACPF domain-containing protein CAD1-like [Juglans regia]	GO:0006955(immune response);GO:0008219(cell death);GO:0009626(plant-type hypersensitive response);GO:0010337(regulation of salicylic acid metabolic process)	ko00520(Amino sugar and nucleotide sugar metabolism)	CAD1	4	820-839	Y	218.832	830	10	10	2	0.794656	.\4_T_Plot\zjhD1\TRINITY_DN53115_c0_g4--830--miR396c-3p_degradome.jpg
miR396d-3p	TCCAAGAAAGCTGTGGGAAA	TRINITY_DN42288_c0_g3	PREDICTED: bZIP transcription factor 17 [Juglans regia]	GO:0000139(Golgi membrane);GO:0003677(DNA binding);GO:0003700(transcription factor activity, sequence-specific DNA binding);GO:0005515(protein binding);GO:0005634(nucleus);GO:0005783(endoplasmic reticulum);GO:0005789(endoplasmic reticulum membrane);GO:0006351(transcription, DNA-templated);GO:0006355(regulation of transcription, DNA-templated);GO:0016021(integral component of membrane);GO:0042538(…	ko03013(RNA transport)	BZIP17	4	496-516	Y	65.6495	506	3	3	2	0.985324	.\4_T_Plot\zjhD1\TRINITY_DN42288_c0_g3--506--miR396d-3p_degradome.jpg
miR397a	TCATTGAGTGCAGCGTTGATG	TRINITY_DN37015_c0_g9	PREDICTED: laccase-13-like [Juglans regia]	GO:0005507(copper ion binding);GO:0016722(oxidoreductase activity, oxidizing metal ions)	ko00053(Ascorbate and aldarate metabolism)	LAC3	3	712-732	Y	87.5327	723	4	4	2	0.933718	.\4_T_Plot\zjhD1\TRINITY_DN37015_c0_g9--723--miR397a_degradome.jpg
miR397a	TCATTGAGTGCAGCGTTGATG	TRINITY_DN43475_c0_g1	laccase [Betula platyphylla]	GO:0005507(copper ion binding);GO:0009809(lignin biosynthetic process);GO:0016722(oxidoreductase activity, oxidizing metal ions)	ko00053(Ascorbate and aldarate metabolism)	IRX12	2	1039-1059	Y	744.028	1050	34	34	2	0.809567	.\4_T_Plot\zjhD1\TRINITY_DN43475_c0_g1--1050--miR397a_degradome.jpg
miR397a	TCATTGAGTGCAGCGTTGATG	TRINITY_DN44960_c1_g3	PREDICTED: laccase-17-like [Juglans regia]	GO:0005507(copper ion binding);GO:0009809(lignin biosynthetic process);GO:0016722(oxidoreductase activity, oxidizing metal ions)	ko00053(Ascorbate and aldarate metabolism)	LAC17	3	722-742	Y	87.5327	733	4	4	2	0.933718	.\4_T_Plot\zjhD1\TRINITY_DN44960_c1_g3--733--miR397a_degradome.jpg
miR397a	TCATTGAGTGCAGCGTTGATG	TRINITY_DN46031_c0_g3	PREDICTED: uncharacterized protein LOC109012664 [Juglans regia]	-	-	-	4	39-58	Y	21.8832	50	1	1	4	0.879128	.\4_T_Plot\zjhD1\TRINITY_DN46031_c0_g3--50--miR397a_degradome.jpg
miR397a	TCATTGAGTGCAGCGTTGATG	TRINITY_DN51624_c0_g3	laccase 1 [Betula platyphylla]	GO:0005507(copper ion binding);GO:0009809(lignin biosynthetic process);GO:0016722(oxidoreductase activity, oxidizing metal ions)	ko00053(Ascorbate and aldarate metabolism)	LAC22	2	1195-1215	Y	43.7663	1206	2	2	2	0.809567	.\4_T_Plot\zjhD1\TRINITY_DN51624_c0_g3--1206--miR397a_degradome.jpg
miR397a	TCATTGAGTGCAGCGTTGATG	TRINITY_DN52669_c1_g3	PREDICTED: laccase-7-like [Juglans regia]	GO:0005507(copper ion binding);GO:0016722(oxidoreductase activity, oxidizing metal ions)	ko00053(Ascorbate and aldarate metabolism)	LAC7	4	813-833	Y	262.598	824	12	12	2	0.878854	.\4_T_Plot\zjhD1\TRINITY_DN52669_c1_g3--824--miR397a_degradome.jpg
miR397a	TCATTGAGTGCAGCGTTGATG	TRINITY_DN56229_c1_g3	PREDICTED: laccase-17-like [Juglans regia]	GO:0005507(copper ion binding);GO:0009809(lignin biosynthetic process);GO:0016722(oxidoreductase activity, oxidizing metal ions)	ko00053(Ascorbate and aldarate metabolism)	LAC17	3.5	260-280	Y	284.481	271	13	13	2	0.452873	.\4_T_Plot\zjhD1\TRINITY_DN56229_c1_g3--271--miR397a_degradome.jpg
miR397b	TCATTGAGTGCAGCGTTGATG	TRINITY_DN37015_c0_g9	PREDICTED: laccase-13-like [Juglans regia]	GO:0005507(copper ion binding);GO:0016722(oxidoreductase activity, oxidizing metal ions)	ko00053(Ascorbate and aldarate metabolism)	LAC3	3	712-732	Y	87.5327	723	4	4	2	0.933718	.\4_T_Plot\zjhD1\TRINITY_DN37015_c0_g9--723--miR397b_degradome.jpg
miR397b	TCATTGAGTGCAGCGTTGATG	TRINITY_DN43475_c0_g1	laccase [Betula platyphylla]	GO:0005507(copper ion binding);GO:0009809(lignin biosynthetic process);GO:0016722(oxidoreductase activity, oxidizing metal ions)	ko00053(Ascorbate and aldarate metabolism)	IRX12	2	1039-1059	Y	744.028	1050	34	34	2	0.809567	.\4_T_Plot\zjhD1\TRINITY_DN43475_c0_g1--1050--miR397b_degradome.jpg
miR397b	TCATTGAGTGCAGCGTTGATG	TRINITY_DN44960_c1_g3	PREDICTED: laccase-17-like [Juglans regia]	GO:0005507(copper ion binding);GO:0009809(lignin biosynthetic process);GO:0016722(oxidoreductase activity, oxidizing metal ions)	ko00053(Ascorbate and aldarate metabolism)	LAC17	3	722-742	Y	87.5327	733	4	4	2	0.933718	.\4_T_Plot\zjhD1\TRINITY_DN44960_c1_g3--733--miR397b_degradome.jpg
miR397b	TCATTGAGTGCAGCGTTGATG	TRINITY_DN46031_c0_g3	PREDICTED: uncharacterized protein LOC109012664 [Juglans regia]	-	-	-	4	39-58	Y	21.8832	50	1	1	4	0.879128	.\4_T_Plot\zjhD1\TRINITY_DN46031_c0_g3--50--miR397b_degradome.jpg
miR397b	TCATTGAGTGCAGCGTTGATG	TRINITY_DN51624_c0_g3	laccase 1 [Betula platyphylla]	GO:0005507(copper ion binding);GO:0009809(lignin biosynthetic process);GO:0016722(oxidoreductase activity, oxidizing metal ions)	ko00053(Ascorbate and aldarate metabolism)	LAC22	2	1195-1215	Y	43.7663	1206	2	2	2	0.809567	.\4_T_Plot\zjhD1\TRINITY_DN51624_c0_g3--1206--miR397b_degradome.jpg
miR397b	TCATTGAGTGCAGCGTTGATG	TRINITY_DN52669_c1_g3	PREDICTED: laccase-7-like [Juglans regia]	GO:0005507(copper ion binding);GO:0016722(oxidoreductase activity, oxidizing metal ions)	ko00053(Ascorbate and aldarate metabolism)	LAC7	4	813-833	Y	262.598	824	12	12	2	0.878854	.\4_T_Plot\zjhD1\TRINITY_DN52669_c1_g3--824--miR397b_degradome.jpg
miR397b	TCATTGAGTGCAGCGTTGATG	TRINITY_DN56229_c1_g3	PREDICTED: laccase-17-like [Juglans regia]	GO:0005507(copper ion binding);GO:0009809(lignin biosynthetic process);GO:0016722(oxidoreductase activity, oxidizing metal ions)	ko00053(Ascorbate and aldarate metabolism)	LAC17	3.5	260-280	Y	284.481	271	13	13	2	0.452873	.\4_T_Plot\zjhD1\TRINITY_DN56229_c1_g3--271--miR397b_degradome.jpg
miR397c	TCATTGAGTTCAGCGTTGATG	TRINITY_DN43475_c0_g1	laccase [Betula platyphylla]	GO:0005507(copper ion binding);GO:0009809(lignin biosynthetic process);GO:0016722(oxidoreductase activity, oxidizing metal ions)	ko00053(Ascorbate and aldarate metabolism)	IRX12	4	1039-1059	Y	744.028	1050	34	34	2	0.928528	.\4_T_Plot\zjhD1\TRINITY_DN43475_c0_g1--1050--miR397c_degradome.jpg
miR397c	TCATTGAGTTCAGCGTTGATG	TRINITY_DN51624_c0_g3	laccase 1 [Betula platyphylla]	GO:0005507(copper ion binding);GO:0009809(lignin biosynthetic process);GO:0016722(oxidoreductase activity, oxidizing metal ions)	ko00053(Ascorbate and aldarate metabolism)	LAC22	4	1195-1215	Y	43.7663	1206	2	2	2	0.928528	.\4_T_Plot\zjhD1\TRINITY_DN51624_c0_g3--1206--miR397c_degradome.jpg
miR397c	TCATTGAGTTCAGCGTTGATG	TRINITY_DN55165_c0_g4	PREDICTED: heterodimeric geranylgeranyl pyrophosphate synthase small subunit, chloroplastic-like [Juglans regia]	GO:0004161(dimethylallyltranstransferase activity);GO:0004311(farnesyltranstransferase activity);GO:0004337(geranyltranstransferase activity);GO:0005515(protein binding);GO:0008299(isoprenoid biosynthetic process);GO:0009507(chloroplast);GO:0009513(etioplast);GO:0016117(carotenoid biosynthetic process);GO:0033384(geranyl diphosphate biosynthetic process);GO:0033386(geranylgeranyl diphosphate bios…	ko00900(Terpenoid backbone biosynthesis)	GGPPS1	4	295-315	Y	21.8832	306	1	1	4	0.92873	.\4_T_Plot\zjhD1\TRINITY_DN55165_c0_g4--306--miR397c_degradome.jpg
miR397d-3p	TCACCGGCGCTGCACTCAATT	TRINITY_DN43745_c0_g1	PREDICTED: 3-ketoacyl-CoA synthase 10 [Juglans regia]	GO:0000038(very long-chain fatty acid metabolic process);GO:0005634(nucleus);GO:0005783(endoplasmic reticulum);GO:0005789(endoplasmic reticulum membrane);GO:0006633(fatty acid biosynthetic process);GO:0008610(lipid biosynthetic process);GO:0009409(response to cold);GO:0009416(response to light stimulus);GO:0009913(epidermal cell differentiation);GO:0016020(membrane);GO:0016021(integral component …	ko00062(Fatty acid elongation)	FDH	4	766-785	Y	21.8832	777	1	1	4	0.652333	.\4_T_Plot\zjhD1\TRINITY_DN43745_c0_g1--777--miR397d-3p_degradome.jpg
miR398a	TGTGTTCTCAGGTCGCCCCTG	TRINITY_DN40577_c0_g2	-	-	-	-	4	32-52	Y	218.832	43	10	10	2	0.410033	.\4_T_Plot\zjhD1\TRINITY_DN40577_c0_g2--43--miR398a_degradome.jpg
miR398b	TGTGTTCTCAGGTCGCCCCT	TRINITY_DN40577_c0_g2	-	-	-	-	4	33-52	Y	218.832	43	10	10	2	0.651939	.\4_T_Plot\zjhD1\TRINITY_DN40577_c0_g2--43--miR398b_degradome.jpg
miR398b	TGTGTTCTCAGGTCGCCCCT	TRINITY_DN49431_c2_g3	Kinase superfamily protein [Theobroma cacao]	GO:0002221(pattern recognition receptor signaling pathway);GO:0004672(protein kinase activity);GO:0004674(protein serine/threonine kinase activity);GO:0005515(protein binding);GO:0005524(ATP binding);GO:0005886(plasma membrane);GO:0006952(defense response);GO:0009816(defense response to bacterium, incompatible interaction);GO:0016301(kinase activity);GO:0042742(defense response to bacterium);GO:0…	ko04626(Plant-pkogen interaction)	PBS1	4	25-44	Y	328.248	35	15	15	2	0.651939	.\4_T_Plot\zjhD1\TRINITY_DN49431_c2_g3--35--miR398b_degradome.jpg
miR399a	TGCCAAAGGAGAATTGCCCTG	TRINITY_DN38037_c0_g7	PREDICTED: probable ubiquitin-conjugating enzyme E2 24 [Juglans regia]	GO:0005737(cytoplasm);GO:0031625(ubiquitin protein ligase binding);GO:0061630(ubiquitin protein ligase activity)	ko04120(Ubiquitin mediated proteolysis)	UBC24	2.5	1056-1076	Y	459.547	1067	21	21	2	0.529445	.\4_T_Plot\zjhD1\TRINITY_DN38037_c0_g7--1067--miR399a_degradome.jpg
miR399a-5p	GTGCAGTCCTCCTTTGGCAGA	TRINITY_DN55616_c0_g3	PREDICTED: uncharacterized protein LOC108999206 isoform X1 [Juglans regia]	GO:0004040(amidase activity);GO:0016884(carbon-nitrogen ligase activity, with glutamine as amido-N-donor)	ko00970(Aminoacyl-tRNA biosynthesis)	gatA	3.5	416-436	Y	328.248	427	15	15	2	0.700652	.\4_T_Plot\zjhD1\TRINITY_DN55616_c0_g3--427--miR399a-5p_degradome.jpg
miR403a	TTAGATTCACGCACAAACTT	TRINITY_DN38522_c0_g2	PREDICTED: protein argonaute 2 [Juglans regia]	GO:0005515(protein binding);GO:0005737(cytoplasm);GO:0006351(transcription, DNA-templated);GO:0006355(regulation of transcription, DNA-templated);GO:0006417(regulation of translation);GO:0019048(modulation by virus of host morphology or physiology);GO:0030529(intracellular ribonucleoprotein complex);GO:0031047(gene silencing by RNA);GO:0035197(siRNA binding);GO:0042742(defense response to bacteri…	-	AGO2	1.5	1905-1924	Y	1619.35	1915	74	74	0	0.00895874	.\4_T_Plot\zjhD1\TRINITY_DN38522_c0_g2--1915--miR403a_degradome.jpg
miR403b	CTAGATTCACGCACAAGCTCG	TRINITY_DN38522_c0_g2	PREDICTED: protein argonaute 2 [Juglans regia]	GO:0005515(protein binding);GO:0005737(cytoplasm);GO:0006351(transcription, DNA-templated);GO:0006355(regulation of transcription, DNA-templated);GO:0006417(regulation of translation);GO:0019048(modulation by virus of host morphology or physiology);GO:0030529(intracellular ribonucleoprotein complex);GO:0031047(gene silencing by RNA);GO:0035197(siRNA binding);GO:0042742(defense response to bacteri…	-	AGO2	3.5	1904-1924	Y	1619.35	1915	74	74	0	0.00598145	.\4_T_Plot\zjhD1\TRINITY_DN38522_c0_g2--1915--miR403b_degradome.jpg
miR403c	TTAGATTCACGCACAAACTTTT	TRINITY_DN38522_c0_g2	PREDICTED: protein argonaute 2 [Juglans regia]	GO:0005515(protein binding);GO:0005737(cytoplasm);GO:0006351(transcription, DNA-templated);GO:0006355(regulation of transcription, DNA-templated);GO:0006417(regulation of translation);GO:0019048(modulation by virus of host morphology or physiology);GO:0030529(intracellular ribonucleoprotein complex);GO:0031047(gene silencing by RNA);GO:0035197(siRNA binding);GO:0042742(defense response to bacteri…	-	AGO2	2.5	1903-1924	Y	1619.35	1915	74	74	0	0.00747121	.\4_T_Plot\zjhD1\TRINITY_DN38522_c0_g2--1915--miR403c_degradome.jpg
miR408a-3p	ATGCACTGCCTCTTCCCTGGC	TRINITY_DN46168_c0_g5	PREDICTED: basic blue protein-like [Juglans regia]	GO:0046658(anchored component of plasma membrane)	-	ARPN	2.5	39-59	Y	109.416	50	5	5	2	0.529445	.\4_T_Plot\zjhD1\TRINITY_DN46168_c0_g5--50--miR408a-3p_degradome.jpg
miR408a-3p	ATGCACTGCCTCTTCCCTGGC	TRINITY_DN45670_c0_g4	PREDICTED: basic blue protein-like [Juglans regia]	GO:0046658(anchored component of plasma membrane)	-	ARPN	3	39-59	Y	11444.9	50	523	523	2	0.492601	.\4_T_Plot\zjhD1\TRINITY_DN45670_c0_g4--50--miR408a-3p_degradome.jpg
miR408a-3p	ATGCACTGCCTCTTCCCTGGC	TRINITY_DN54081_c0_g2	PREDICTED: LOW QUALITY PROTEIN: copper-transporting ATPase PAA2, chloroplastic [Fragaria vesca subsp. vesca]	GO:0005887(integral component of plasma membrane);GO:0043231(intracellular membrane-bounded organelle);GO:0043682(copper-transporting ATPase activity)	ko00190(Oxidative phosphorylation)	PAA2	4	1446-1467	Y	153.182	1457	7	7	2	0.794656	.\4_T_Plot\zjhD1\TRINITY_DN54081_c0_g2--1457--miR408a-3p_degradome.jpg
miR477a-3p	TGAGGCCTTTGGGGAGAGTGG	TRINITY_DN27795_c0_g1	PREDICTED: uncharacterized protein LOC108990219 [Juglans regia]	GO:0005634(nucleus);GO:0008150(biological_process)	-	-	3.5	130-150	Y	21.8832	141	1	1	4	0.836536	.\4_T_Plot\zjhD1\TRINITY_DN27795_c0_g1--141--miR477a-3p_degradome.jpg
miR477a-3p	TGAGGCCTTTGGGGAGAGTGG	TRINITY_DN34286_c0_g1	PREDICTED: nuclear inhibitor of protein phosphatase 1 [Juglans regia]	GO:0003674(molecular_function);GO:0005634(nucleus);GO:0008150(biological_process)	-	-	3.5	604-625	Y	21.8832	616	1	1	4	0.836536	.\4_T_Plot\zjhD1\TRINITY_DN34286_c0_g1--616--miR477a-3p_degradome.jpg
miR482a	TCTTTCCTAGTCCACCCATTCC	TRINITY_DN40824_c0_g1	PREDICTED: putative disease resistance protein RGA4 [Theobroma cacao]	GO:0005515(protein binding);GO:0005524(ATP binding);GO:0005576(extracellular region);GO:0006952(defense response);GO:0043531(ADP binding)	ko03040(Spliceosome)	RGA4	3.5	388-409	Y	124.005	400	13	5.66667	2	0.973176	.\4_T_Plot\zjhD1\TRINITY_DN40824_c0_g1--400--miR482a_degradome.jpg
miR482a	TCTTTCCTAGTCCACCCATTCC	TRINITY_DN38816_c0_g1	PREDICTED: microtubule-associated protein 70-5-like [Juglans regia]	GO:0005737(cytoplasm);GO:0005874(microtubule);GO:0007010(cytoskeleton organization);GO:0008017(microtubule binding);GO:0009832(plant-type cell wall biogenesis);GO:0010051(xylem and phloem pattern formation);GO:0071555(cell wall organization)	-	MAP70.5	4	665-685	Y	21.8832	676	1	1	4	0.92873	.\4_T_Plot\zjhD1\TRINITY_DN38816_c0_g1--676--miR482a_degradome.jpg
miR482a	TCTTTCCTAGTCCACCCATTCC	TRINITY_DN43645_c0_g1	PREDICTED: putative disease resistance protein RGA1 isoform X1 [Juglans regia]	GO:0005515(protein binding);GO:0005524(ATP binding);GO:0005576(extracellular region);GO:0006952(defense response);GO:0043531(ADP binding)	ko01230(Biosynthesis of amino acids);ko00400(Phenylalanine, tyrosine and tryptophan biosynthesis)	RGA4	3	75-96	Y	25.5304	87	3	1.16667	2	0.966368	.\4_T_Plot\zjhD1\TRINITY_DN43645_c0_g1--87--miR482a_degradome.jpg
miR482a	TCTTTCCTAGTCCACCCATTCC	TRINITY_DN42294_c1_g1	hypothetical protein MANES_07G008900 [Manihot esculenta]	GO:0005515(protein binding);GO:0005524(ATP binding);GO:0005576(extracellular region);GO:0006952(defense response);GO:0043531(ADP binding)	ko01230(Biosynthesis of amino acids);ko00400(Phenylalanine, tyrosine and tryptophan biosynthesis)	RGA2	3.5	97-118	Y	36.4719	109	5	1.66667	2	0.973176	.\4_T_Plot\zjhD1\TRINITY_DN42294_c1_g1--109--miR482a_degradome.jpg
miR482a	TCTTTCCTAGTCCACCCATTCC	TRINITY_DN42858_c0_g1	PREDICTED: putative disease resistance protein RGA1 isoform X1 [Juglans regia]	GO:0005515(protein binding);GO:0005524(ATP binding);GO:0005576(extracellular region);GO:0006952(defense response);GO:0043531(ADP binding)	ko04626(Plant-pkogen interaction)	RGA4	4	49-70	Y	21.8832	61	1	1	4	0.92873	.\4_T_Plot\zjhD1\TRINITY_DN42858_c0_g1--61--miR482a_degradome.jpg
miR482a	TCTTTCCTAGTCCACCCATTCC	TRINITY_DN54922_c0_g1	PREDICTED: putative disease resistance protein RGA3, partial [Juglans regia]	GO:0005515(protein binding);GO:0005524(ATP binding);GO:0005576(extracellular region);GO:0006952(defense response);GO:0043531(ADP binding)	ko01230(Biosynthesis of amino acids);ko00400(Phenylalanine, tyrosine and tryptophan biosynthesis)	RGA3	1.5	321-342	Y	14.5888	333	2	0.666667	2	0.595301	.\4_T_Plot\zjhD1\TRINITY_DN54922_c0_g1--333--miR482a_degradome.jpg
miR482a	TCTTTCCTAGTCCACCCATTCC	TRINITY_DN55570_c0_g1	PREDICTED: putative disease resistance protein RGA3 [Juglans regia]	GO:0005515(protein binding);GO:0005524(ATP binding);GO:0005576(extracellular region);GO:0006952(defense response);GO:0043531(ADP binding)	ko01230(Biosynthesis of amino acids);ko00400(Phenylalanine, tyrosine and tryptophan biosynthesis)	RGA3	3	29-50	Y	25.5304	41	3	1.16667	2	0.966368	.\4_T_Plot\zjhD1\TRINITY_DN55570_c0_g1--41--miR482a_degradome.jpg
miR482a	TCTTTCCTAGTCCACCCATTCC	TRINITY_DN56159_c0_g3	PREDICTED: disease resistance protein RGA2-like isoform X1 [Juglans regia]	GO:0005515(protein binding);GO:0005524(ATP binding);GO:0005576(extracellular region);GO:0006952(defense response);GO:0043531(ADP binding)	ko04626(Plant-pkogen interaction)	RGA1	3.5	278-299	Y	124.005	290	13	5.66667	2	0.973176	.\4_T_Plot\zjhD1\TRINITY_DN56159_c0_g3--290--miR482a_degradome.jpg
miR482b	TCTTCCCTACTCCGCCCATGCC	TRINITY_DN48730_c1_g4	PREDICTED: TMV resistance protein N-like isoform X1 [Juglans regia]	GO:0005737(cytoplasm);GO:0006952(defense response);GO:0007165(signal transduction);GO:0016021(integral component of membrane);GO:0043531(ADP binding)	ko04141(Protein processing in endoplasmic reticulum)	RPS6	3.5	341-362	Y	94.8271	353	11	4.33333	2	0.452873	.\4_T_Plot\zjhD1\TRINITY_DN48730_c1_g4--353--miR482b_degradome.jpg
miR482b	TCTTCCCTACTCCGCCCATGCC	TRINITY_DN49670_c0_g2	-	-	-	-	3	82-102	Y	43.7663	93	2	2	2	0.492601	.\4_T_Plot\zjhD1\TRINITY_DN49670_c0_g2--93--miR482b_degradome.jpg
miR482b	TCTTCCCTACTCCGCCCATGCC	TRINITY_DN57275_c1_g1	PREDICTED: disease resistance protein At4g27190-like [Juglans regia]	GO:0005524(ATP binding);GO:0005739(mitochondrion);GO:0006952(defense response);GO:0043531(ADP binding)	ko04626(Plant-pkogen interaction)	At4g27190	4	53-74	Y	1050.39	65	48	48	2	0.410033	.\4_T_Plot\zjhD1\TRINITY_DN57275_c1_g1--65--miR482b_degradome.jpg
miR482c	TCTTGCCTACACCGCCCATGCC	TRINITY_DN46972_c0_g1	PREDICTED: putative disease resistance protein At1g50180 [Juglans regia]	GO:0005524(ATP binding);GO:0006952(defense response);GO:0009506(plasmodesma);GO:0043531(ADP binding)	ko04626(Plant-pkogen interaction)	At1g50180	3.5	749-770	Y	2450.91	761	112	112	0	0.0178372	.\4_T_Plot\zjhD1\TRINITY_DN46972_c0_g1--761--miR482c_degradome.jpg
miR482c	TCTTGCCTACACCGCCCATGCC	TRINITY_DN56197_c1_g1	PREDICTED: putative disease resistance RPP13-like protein 1 isoform X1 [Juglans regia]	GO:0005515(protein binding);GO:0005524(ATP binding);GO:0005576(extracellular region);GO:0006952(defense response);GO:0043531(ADP binding)	ko03040(Spliceosome)	RPPL1	3.5	653-674	Y	18.236	665	2	0.833333	2	0.836218	.\4_T_Plot\zjhD1\TRINITY_DN56197_c1_g1--665--miR482c_degradome.jpg
miR482c	TCTTGCCTACACCGCCCATGCC	TRINITY_DN57275_c1_g1	PREDICTED: disease resistance protein At4g27190-like [Juglans regia]	GO:0005524(ATP binding);GO:0005739(mitochondrion);GO:0006952(defense response);GO:0043531(ADP binding)	ko04626(Plant-pkogen interaction)	At4g27190	4	53-74	Y	1050.39	65	48	48	2	0.410033	.\4_T_Plot\zjhD1\TRINITY_DN57275_c1_g1--65--miR482c_degradome.jpg
miR482e-3p	CGAGACCTCCCATTCCAA	TRINITY_DN48764_c1_g9	Skp1/Ask1-like protein [Zantedeschia hybrid cultivar]	GO:0004842(ubiquitin-protein transferase activity);GO:0005515(protein binding);GO:0005634(nucleus);GO:0005737(cytoplasm);GO:0006511(ubiquitin-dependent protein catabolic process);GO:0007059(chromosome segregation);GO:0009734(auxin-activated signaling pathway);GO:0009793(embryo development ending in seed dormancy);GO:0009873(ethylene-activated signaling pathway);GO:0016032(viral process);GO:001656…	ko04141(Protein processing in endoplasmic reticulum);ko04120(Ubiquitin mediated proteolysis)	SKP1B	4	221-237	Y	36.4719	229	4	1.66667	3	0.599572	.\4_T_Plot\zjhD1\TRINITY_DN48764_c1_g9--229--miR482e-3p_degradome.jpg
miR5072a	TCCCCAGCAGAGTCGCCA	TRINITY_DN48815_c0_g3	PREDICTED: structural maintenance of chromosomes protein 1 [Juglans regia]	GO:0003682(chromatin binding);GO:0005524(ATP binding);GO:0005634(nucleus);GO:0005694(chromosome);GO:0006281(DNA repair);GO:0007064(mitotic sister chromatid cohesion);GO:0008280(cohesin core heterodimer);GO:0048703(embryonic viscerocranium morphogenesis);GO:0051276(chromosome organization)	-	SMC1	3.5	1899-1916	Y	21.8832	1907	1	1	4	0.992012	.\4_T_Plot\zjhD1\TRINITY_DN48815_c0_g3--1907--miR5072a_degradome.jpg
miR5072a	TCCCCAGCAGAGTCGCCA	TRINITY_DN57048_c0_g1	PREDICTED: L-ascorbate peroxidase, cytosolic [Ziziphus jujuba]	GO:0005737(cytoplasm);GO:0005829(cytosol);GO:0006979(response to oxidative stress);GO:0016688(L-ascorbate peroxidase activity);GO:0020037(heme binding);GO:0042744(hydrogen peroxide catabolic process);GO:0046872(metal ion binding);GO:0055114(oxidation-reduction process)	ko00053(Ascorbate and aldarate metabolism);ko00480(Glutkoione metabolism)	APX1	4	67-83	Y	21.8832	74	2	1	3	0.539028	.\4_T_Plot\zjhD1\TRINITY_DN57048_c0_g1--74--miR5072a_degradome.jpg
miR5268a-5p	TAACAAAGTCTGAATGGT	TRINITY_DN38050_c0_g1	PREDICTED: aspartyl protease AED3 [Juglans regia]	GO:0004190(aspartic-type endopeptidase activity);GO:0006508(proteolysis);GO:0030163(protein catabolic process)	-	AED3	4	1274-1290	Y	109.416	1281	5	5	2	1	.\4_T_Plot\zjhD1\TRINITY_DN38050_c0_g1--1281--miR5268a-5p_degradome.jpg
miR5268a-5p	TAACAAAGTCTGAATGGT	TRINITY_DN37424_c0_g3	PREDICTED: auxin response factor 19-like [Juglans regia]	GO:0003677(DNA binding);GO:0003700(transcription factor activity, sequence-specific DNA binding);GO:0005634(nucleus);GO:0006351(transcription, DNA-templated);GO:0006355(regulation of transcription, DNA-templated);GO:0009723(response to ethylene);GO:0009733(response to auxin);GO:0009734(auxin-activated signaling pathway);GO:0010311(lateral root formation);GO:0043565(sequence-specific DNA binding);…	ko04075(Plant hormone signal transduction)	ARF19	4	850-866	Y	21.8832	857	1	1	4	1	.\4_T_Plot\zjhD1\TRINITY_DN37424_c0_g3--857--miR5268a-5p_degradome.jpg
miR5268a-5p	TAACAAAGTCTGAATGGT	TRINITY_DN41246_c0_g4	PREDICTED: E3 ubiquitin-protein ligase UPL5 [Juglans regia]	GO:0004842(ubiquitin-protein transferase activity);GO:0005634(nucleus);GO:0005737(cytoplasm);GO:0042787(protein ubiquitination involved in ubiquitin-dependent protein catabolic process)	ko04120(Ubiquitin mediated proteolysis);ko04144(Endocytosis)	UPL5	3.5	2990-3006	Y	21.8832	2997	1	1	4	0.992012	.\4_T_Plot\zjhD1\TRINITY_DN41246_c0_g4--2997--miR5268a-5p_degradome.jpg
miR5268a-5p	TAACAAAGTCTGAATGGT	TRINITY_DN44258_c0_g2	PREDICTED: probable histone-arginine methyltransferase 1.3 [Juglans regia]	GO:0005829(cytosol);GO:0006355(regulation of transcription, DNA-templated);GO:0008469(histone-arginine N-methyltransferase activity);GO:0035242(protein-arginine omega-N asymmetric methyltransferase activity)	ko03013(RNA transport)	PRMT13	4	619-636	Y	21.8832	627	1	1	4	1	.\4_T_Plot\zjhD1\TRINITY_DN44258_c0_g2--627--miR5268a-5p_degradome.jpg
miR5268a-5p	TAACAAAGTCTGAATGGT	TRINITY_DN48889_c0_g4	-	-	-	-	2.5	75-91	Y	62.0023	82	5	2.83333	2	0.529445	.\4_T_Plot\zjhD1\TRINITY_DN48889_c0_g4--82--miR5268a-5p_degradome.jpg
miR5268a-5p	TAACAAAGTCTGAATGGT	TRINITY_DN50240_c0_g4	PREDICTED: uncharacterized protein At4g28440 [Theobroma cacao]	GO:0003674(molecular_function);GO:0005634(nucleus);GO:0008150(biological_process)	ko03030(DNA replication);ko03420(Nucleotide excision repair);ko03430(komatch repair);ko03440(Homologous recombination)	At4g28440	3.5	443-459	Y	175.065	450	8	8	2	0.99197	.\4_T_Plot\zjhD1\TRINITY_DN50240_c0_g4--450--miR5268a-5p_degradome.jpg
miR5268a-5p	TAACAAAGTCTGAATGGT	TRINITY_DN51413_c2_g4	-	-	-	-	3.5	7-23	Y	109.416	14	5	5	2	0.99197	.\4_T_Plot\zjhD1\TRINITY_DN51413_c2_g4--14--miR5268a-5p_degradome.jpg
miR5268a-5p	TAACAAAGTCTGAATGGT	TRINITY_DN50874_c1_g3	hypothetical protein DCAR_031432 [Daucus carota subsp. sativus]	-	-	-	4	1190-1207	Y	21.8832	1198	1	1	4	1	.\4_T_Plot\zjhD1\TRINITY_DN50874_c1_g3--1198--miR5268a-5p_degradome.jpg
miR5268a-5p	TAACAAAGTCTGAATGGT	TRINITY_DN56851_c1_g1	PREDICTED: uncharacterized protein LOC108980054 [Juglans regia]	GO:0005634(nucleus);GO:0008270(zinc ion binding);GO:0035556(intracellular signal transduction);GO:0047134(protein-disulfide reductase activity);GO:0055114(oxidation-reduction process)	-	-	1	623-640	Y	21.8832	631	1	1	4	0.625081	.\4_T_Plot\zjhD1\TRINITY_DN56851_c1_g1--631--miR5268a-5p_degradome.jpg
miR528a-3p	CCTGTGCCTGCCTCTTCCATT	TRINITY_DN36516_c2_g4	PREDICTED: UPF0603 protein At1g54780, chloroplastic [Juglans regia]	GO:0003993(acid phosphatase activity);GO:0009507(chloroplast);GO:0009534(chloroplast thylakoid);GO:0009535(chloroplast thylakoid membrane);GO:0009543(chloroplast thylakoid lumen);GO:0009579(thylakoid);GO:0010206(photosystem II repair);GO:0016021(integral component of membrane);GO:0016311(dephosphorylation);GO:0031977(thylakoid lumen)	-	At1g54780	4	608-628	Y	87.5327	619	4	4	2	0.794656	.\4_T_Plot\zjhD1\TRINITY_DN36516_c2_g4--619--miR528a-3p_degradome.jpg
miR6020a	AAATGTTCTTCGAGTATCTTC	TRINITY_DN49824_c0_g1	PREDICTED: 9-cis-epoxycarotenoid dioxygenase NCED1, chloroplastic-like [Juglans regia]	GO:0006970(response to osmotic stress);GO:0009414(response to water deprivation);GO:0009507(chloroplast);GO:0009535(chloroplast thylakoid membrane);GO:0009570(chloroplast stroma);GO:0009688(abscisic acid biosynthetic process);GO:0042538(hyperosmotic salinity response);GO:0045549(9-cis-epoxycarotenoid dioxygenase activity);GO:0046872(metal ion binding);GO:0055114(oxidation-reduction process)	ko00906(Carotenoid biosynthesis)	NCED1	4	1387-1408	Y	21.8832	1399	1	1	4	0.879128	.\4_T_Plot\zjhD1\TRINITY_DN49824_c0_g1--1399--miR6020a_degradome.jpg
miR6021a	TTGGAAGAGGCTGCTATTGGA	TRINITY_DN40252_c0_g1	PREDICTED: serine carboxypeptidase-like 45 [Ricinus communis]	GO:0004185(serine-type carboxypeptidase activity);GO:0016747(transferase activity, transferring acyl groups other than amino-acyl groups);GO:0019748(secondary metabolic process);GO:0051603(proteolysis involved in cellular protein catabolic process)	ko00460(Cyanoamino acid metabolism)	SCPL45	4	1363-1383	Y	87.5327	1374	4	4	2	0.975123	.\4_T_Plot\zjhD1\TRINITY_DN40252_c0_g1--1374--miR6021a_degradome.jpg
miR6024a	TTTAGCAAGAGTTGTTTTACC	TRINITY_DN37419_c0_g4	PREDICTED: TMV resistance protein N-like isoform X1 [Juglans regia]	GO:0005829(cytosol);GO:0006952(defense response);GO:0007165(signal transduction);GO:0043531(ADP binding)	ko03040(Spliceosome);ko04141(Protein processing in endoplasmic reticulum);ko04144(Endocytosis)	-	3.5	44-64	Y	21.8832	55	1	1	4	0.836536	.\4_T_Plot\zjhD1\TRINITY_DN37419_c0_g4--55--miR6024a_degradome.jpg
miR6155a	TAAGGTTGCCTTGCTCTTGCA	TRINITY_DN57066_c0_g9	PREDICTED: transcription factor WER-like [Jatropha curcas]	GO:0003677(DNA binding);GO:0003700(transcription factor activity, sequence-specific DNA binding);GO:0005515(protein binding);GO:0005634(nucleus);GO:0006351(transcription, DNA-templated);GO:0006355(regulation of transcription, DNA-templated);GO:0045165(cell fate commitment);GO:0045893(positive regulation of transcription, DNA-templated);GO:0048765(root hair cell differentiation)	ko04712(Circadian rhythm - plant)	WER	4	216-235	Y	43.7663	226	2	2	2	0.794656	.\4_T_Plot\zjhD1\TRINITY_DN57066_c0_g9--226--miR6155a_degradome.jpg
miR7122a	TTATTCAGAGAAATCACGGTTG	TRINITY_DN39196_c1_g2	-	-	-	-	1.5	301-322	Y	21.8832	313	1	1	4	0.595693	.\4_T_Plot\zjhD1\TRINITY_DN39196_c1_g2--313--miR7122a_degradome.jpg
miR7122b	TTATTCAGAGAAATCACGGTTG	TRINITY_DN39196_c1_g2	-	-	-	-	1.5	301-322	Y	21.8832	313	1	1	4	0.595693	.\4_T_Plot\zjhD1\TRINITY_DN39196_c1_g2--313--miR7122b_degradome.jpg
miR8155a	AACCTGGCTCTGATACCA	TRINITY_DN38376_c0_g6	PREDICTED: rho-N domain-containing protein 1, chloroplastic [Juglans regia]	GO:0005515(protein binding);GO:0005634(nucleus);GO:0006353(DNA-templated transcription, termination);GO:0009507(chloroplast);GO:0009737(response to abscisic acid);GO:0010239(chloroplast mRNA processing);GO:0019843(rRNA binding);GO:0043621(protein self-association);GO:1901259(chloroplast rRNA processing)	-	RHON1	4	998-1016	Y	21.8832	1006	1	1	4	0.999998	.\4_T_Plot\zjhD1\TRINITY_DN38376_c0_g6--1006--miR8155a_degradome.jpg
miR8155a	AACCTGGCTCTGATACCA	TRINITY_DN44982_c0_g6	-	-	-	-	4	262-280	Y	21.8832	270	1	1	4	0.999998	.\4_T_Plot\zjhD1\TRINITY_DN44982_c0_g6--270--miR8155a_degradome.jpg
miR8155a	AACCTGGCTCTGATACCA	TRINITY_DN48635_c0_g3	PREDICTED: hypersensitive-induced response protein 1-like [Gossypium raimondii]	GO:0005515(protein binding);GO:0005773(vacuole);GO:0005774(vacuolar membrane);GO:0005794(Golgi apparatus);GO:0005829(cytosol);GO:0005886(plasma membrane);GO:0009506(plasmodesma);GO:0016020(membrane);GO:0043424(protein histidine kinase binding)	-	HIR1	4	342-360	Y	153.182	350	7	7	2	0.999998	.\4_T_Plot\zjhD1\TRINITY_DN48635_c0_g3--350--miR8155a_degradome.jpg
miR8155a	AACCTGGCTCTGATACCA	TRINITY_DN50442_c0_g1	PREDICTED: mitogen-activated protein kinase kinase 5-like [Juglans regia]	GO:0004702(receptor signaling protein serine/threonine kinase activity);GO:0005737(cytoplasm)	ko04626(Plant-pkogen interaction)	MKK4	4	1326-1343	Y	21.8832	1334	1	1	4	0.999998	.\4_T_Plot\zjhD1\TRINITY_DN50442_c0_g1--1334--miR8155a_degradome.jpg
miR858a-3p	CTCGTTGTCTGTTCGACCTTG	TRINITY_DN38289_c0_g1	unnamed protein product, partial [Vitis vinifera]	GO:0003677(DNA binding);GO:0003700(transcription factor activity, sequence-specific DNA binding);GO:0005634(nucleus);GO:0006351(transcription, DNA-templated);GO:0006355(regulation of transcription, DNA-templated);GO:0009611(response to wounding);GO:0009651(response to salt stress);GO:0009737(response to abscisic acid);GO:0009751(response to salicylic acid);GO:0009800(cinnamic acid biosynthetic pr…	ko00190(Oxidative phosphorylation);ko00860(Porphyrin and chlorophyll metabolism)	C1	3.5	369-388	Y	445.687	379	44	20.3667	0	0.0411262	.\4_T_Plot\zjhD1\TRINITY_DN38289_c0_g1--379--miR858a-3p_degradome.jpg
miR858a-3p	CTCGTTGTCTGTTCGACCTTG	TRINITY_DN37840_c0_g4	PREDICTED: transcription factor MYB59 [Vitis vinifera]	GO:0003677(DNA binding);GO:0003700(transcription factor activity, sequence-specific DNA binding);GO:0005634(nucleus);GO:0006351(transcription, DNA-templated);GO:0006355(regulation of transcription, DNA-templated);GO:0009751(response to salicylic acid)	ko00190(Oxidative phosphorylation);ko00860(Porphyrin and chlorophyll metabolism)	MYB48	3.5	579-598	Y	153.182	589	7	7	2	0.985324	.\4_T_Plot\zjhD1\TRINITY_DN37840_c0_g4--589--miR858a-3p_degradome.jpg
miR858a-3p	CTCGTTGTCTGTTCGACCTTG	TRINITY_DN41362_c0_g7	Myb domain protein 4, putative [Theobroma cacao]	GO:0003677(DNA binding);GO:0003700(transcription factor activity, sequence-specific DNA binding);GO:0005634(nucleus);GO:0006355(regulation of transcription, DNA-templated);GO:0009651(response to salt stress);GO:0009751(response to salicylic acid);GO:1900384(regulation of flavonol biosynthetic process)	ko04712(Circadian rhythm - plant)	C1	3.5	365-384	Y	270.622	375	18	12.3667	2	0.985324	.\4_T_Plot\zjhD1\TRINITY_DN41362_c0_g7--375--miR858a-3p_degradome.jpg
miR858a-3p	CTCGTTGTCTGTTCGACCTTG	TRINITY_DN44180_c0_g1	PREDICTED: transcription factor MYB23-like [Glycine max]	GO:0003677(DNA binding);GO:0003700(transcription factor activity, sequence-specific DNA binding);GO:0005634(nucleus);GO:0006351(transcription, DNA-templated);GO:0006355(regulation of transcription, DNA-templated);GO:0009651(response to salt stress);GO:0009723(response to ethylene);GO:0009733(response to auxin);GO:0009813(flavonoid biosynthetic process);GO:0045893(positive regulation of transcript…	ko04712(Circadian rhythm - plant)	C1	3.5	352-371	Y	18003.3	362	1635	822.7	0	0.0411262	.\4_T_Plot\zjhD1\TRINITY_DN44180_c0_g1--362--miR858a-3p_degradome.jpg
miR858a-3p	CTCGTTGTCTGTTCGACCTTG	TRINITY_DN44180_c0_g4	PREDICTED: myb-related protein 330-like [Juglans regia]	GO:0003677(DNA binding);GO:0003700(transcription factor activity, sequence-specific DNA binding);GO:0005515(protein binding);GO:0005524(ATP binding);GO:0005634(nucleus);GO:0006351(transcription, DNA-templated);GO:0006355(regulation of transcription, DNA-templated);GO:0006633(fatty acid biosynthetic process);GO:0006970(response to osmotic stress);GO:0009813(flavonoid biosynthetic process);GO:00100…	ko00190(Oxidative phosphorylation);ko00860(Porphyrin and chlorophyll metabolism)	C1	3.5	349-368	Y	17762.6	359	1624	811.7	0	0.0411262	.\4_T_Plot\zjhD1\TRINITY_DN44180_c0_g4--359--miR858a-3p_degradome.jpg
blu-miR1-3p	TGAGCCGGAACCAATATCACTC	TRINITY_DN54065_c1_g5	PREDICTED: zinc finger CCCH domain-containing protein 46-like isoform X2 [Juglans regia]	GO:0000166(nucleotide binding);GO:0003677(DNA binding);GO:0003723(RNA binding);GO:0004518(nuclease activity);GO:0005575(cellular_component);GO:0008150(biological_process);GO:0046872(metal ion binding)	-	Os07g0682400	2	451-472	N
blu-miR10-3p	TTTGCAAGAATTGGACGGAGG	TRINITY_DN31103_c0_g2	ATP-citrate synthase [Anthurium amnicola]	GO:0005575(cellular_component)	ko00020(korate cycle (TCA cycle))	B14D6.310	4	2-22	N
blu-miR10-3p	TTTGCAAGAATTGGACGGAGG	TRINITY_DN39178_c1_g1	PREDICTED: uncharacterized protein LOC108998663 [Juglans regia]	GO:0005634(nucleus);GO:0005886(plasma membrane);GO:0009506(plasmodesma)	-	-	4	2043-2063	N
blu-miR10-3p	TTTGCAAGAATTGGACGGAGG	TRINITY_DN40928_c0_g5	PREDICTED: U-box domain-containing protein 33-like [Juglans regia]	GO:0004674(protein serine/threonine kinase activity);GO:0004842(ubiquitin-protein transferase activity);GO:0005524(ATP binding);GO:0005886(plasma membrane);GO:0006468(protein phosphorylation);GO:0016301(kinase activity);GO:0016567(protein ubiquitination);GO:0016874(ligase activity)	-	PUB33	4	1910-1930	N
blu-miR10-3p	TTTGCAAGAATTGGACGGAGG	TRINITY_DN42380_c0_g1	PREDICTED: uncharacterized protein LOC108989402 [Juglans regia]	GO:0003674(molecular_function);GO:0005634(nucleus);GO:0005886(plasma membrane)	-	-	3	1875-1895	N
blu-miR10-3p	TTTGCAAGAATTGGACGGAGG	TRINITY_DN47466_c0_g4	PREDICTED: uncharacterized protein LOC108997101 isoform X1 [Juglans regia]	GO:0004842(ubiquitin-protein transferase activity);GO:0005576(extracellular region);GO:0008270(zinc ion binding)	-	-	4	967-987	N
blu-miR10-3p	TTTGCAAGAATTGGACGGAGG	TRINITY_DN47900_c1_g1	PREDICTED: COX assembly mitochondrial protein 2 homolog [Juglans regia]	GO:0005739(mitochondrion)	ko00770(Pantothenate and CoA biosynthesis)	-	3	241-261	N
blu-miR10-3p	TTTGCAAGAATTGGACGGAGG	TRINITY_DN48141_c0_g1	PREDICTED: probable LRR receptor-like serine/threonine-protein kinase At1g67720 [Juglans regia]	GO:0004672(protein kinase activity);GO:0004674(protein serine/threonine kinase activity);GO:0005524(ATP binding);GO:0005886(plasma membrane);GO:0006468(protein phosphorylation);GO:0016021(integral component of membrane);GO:0016301(kinase activity);GO:0016310(phosphorylation)	ko04626(Plant-pkogen interaction)	At1g67720	4	2244-2264	N
blu-miR10-3p	TTTGCAAGAATTGGACGGAGG	TRINITY_DN53328_c1_g4	PREDICTED: uncharacterized protein LOC109010751 [Juglans regia]	GO:0042254(ribosome biogenesis)	ko03010(Ribosome)	rpmJ	4	587-606	N
blu-miR10-3p	TTTGCAAGAATTGGACGGAGG	TRINITY_DN55609_c0_g4	PREDICTED: B3 domain-containing transcription repressor VAL2 isoform X4 [Juglans regia]	GO:0003677(DNA binding);GO:0003700(transcription factor activity, sequence-specific DNA binding);GO:0005515(protein binding);GO:0005634(nucleus);GO:0006351(transcription, DNA-templated);GO:0006355(regulation of transcription, DNA-templated);GO:0008270(zinc ion binding);GO:0010030(positive regulation of seed germination);GO:2000034(regulation of seed maturation)	-	Os07g0679700	2.5	159-180	N
blu-miR10-5p	TCCGTCCAACTTTTGCAAATT	TRINITY_DN34302_c0_g2	-	-	-	-	4	142-161	N
blu-miR10-5p	TCCGTCCAACTTTTGCAAATT	TRINITY_DN40957_c0_g3	PREDICTED: cationic amino acid transporter 1-like [Juglans regia]	GO:0005313(L-glutamate transmembrane transporter activity);GO:0005887(integral component of plasma membrane);GO:0015189(L-lysine transmembrane transporter activity);GO:0015297(antiporter activity);GO:0043091(L-arginine import);GO:0051938(L-glutamate import);GO:1903401(L-lysine transmembrane transport)	-	CAT1	4	1473-1492	N
blu-miR10-5p	TCCGTCCAACTTTTGCAAATT	TRINITY_DN42546_c0_g1	PREDICTED: peptidyl-prolyl cis-trans isomerase CYP37, chloroplastic isoform X2 [Juglans regia]	GO:0000209(protein polyubiquitination);GO:0003755(peptidyl-prolyl cis-trans isomerase activity);GO:0005634(nucleus);GO:0034450(ubiquitin-ubiquitin ligase activity)	-	CYP37	4	244-263	N
blu-miR10-5p	TCCGTCCAACTTTTGCAAATT	TRINITY_DN45437_c0_g5	PREDICTED: protein trichome birefringence-like [Juglans regia]	GO:0005794(Golgi apparatus);GO:0016413(O-acetyltransferase activity);GO:0071554(cell wall organization or biogenesis)	-	TBR	4	1124-1144	N
blu-miR10-5p	TCCGTCCAACTTTTGCAAATT	TRINITY_DN56093_c0_g5	hypothetical protein VIGAN_01034100 [Vigna angularis var. angularis]	GO:0005506(iron ion binding);GO:0005737(cytoplasm);GO:0006949(syncytium formation);GO:0019310(inositol catabolic process);GO:0019853(L-ascorbic acid biosynthetic process);GO:0050113(inositol oxygenase activity);GO:0055114(oxidation-reduction process)	ko00053(Ascorbate and aldarate metabolism);ko00562(Inositol phosphate metabolism)	MIOX2	4	504-525	N
blu-miR11-3p	TGCCATCCTCTTGTGACACG	TRINITY_DN46911_c0_g2	hypothetical protein CICLE_v10014825mg [Citrus clementina]	GO:0005507(copper ion binding);GO:0009505(plant-type cell wall);GO:0009506(plasmodesma);GO:0016722(oxidoreductase activity, oxidizing metal ions)	ko00053(Ascorbate and aldarate metabolism)	Bp10	4	693-712	N
blu-miR11-3p	TGCCATCCTCTTGTGACACG	TRINITY_DN52800_c0_g1	PREDICTED: ubiquinol oxidase 2, mitochondrial-like [Juglans regia]	GO:0005739(mitochondrion);GO:0005743(mitochondrial inner membrane);GO:0009409(response to cold);GO:0009916(alternative oxidase activity);GO:0016021(integral component of membrane);GO:0031930(mitochondria-nucleus signaling pathway);GO:0045333(cellular respiration);GO:0046872(metal ion binding);GO:0055114(oxidation-reduction process);GO:0070469(respiratory chain)	ko00970(Aminoacyl-tRNA biosynthesis)	AOX1A	4	402-420	N
blu-miR11-3p	TGCCATCCTCTTGTGACACG	TRINITY_DN55294_c1_g2	PREDICTED: uncharacterized protein LOC108984002 [Juglans regia]	GO:0005739(mitochondrion);GO:0009507(chloroplast);GO:0009536(plastid);GO:0016020(membrane)	-	-	3.5	776-794	N
blu-miR12-3p	CCATCCTCCTGTGCCAGTAT	TRINITY_DN38951_c1_g1	PREDICTED: myb-related protein B-like [Juglans regia]	GO:0003677(DNA binding);GO:0003700(transcription factor activity, sequence-specific DNA binding);GO:0005634(nucleus);GO:0006355(regulation of transcription, DNA-templated)	ko00190(Oxidative phosphorylation);ko00860(Porphyrin and chlorophyll metabolism)	MYB3R-1	3.5	333-351	N
blu-miR12-3p	CCATCCTCCTGTGCCAGTAT	TRINITY_DN47536_c1_g3	PREDICTED: protein NRT1/ PTR FAMILY 7.1-like isoform X1 [Juglans regia]	GO:0005215(transporter activity);GO:0005886(plasma membrane);GO:0006810(transport);GO:0006857(oligopeptide transport);GO:0016020(membrane);GO:0016021(integral component of membrane)	-	NPF7.1	4	201-220	N
blu-miR12-3p	CCATCCTCCTGTGCCAGTAT	TRINITY_DN56556_c1_g1	PREDICTED: E3 ubiquitin-protein ligase UPL1 [Juglans regia]	GO:0004842(ubiquitin-protein transferase activity);GO:0005634(nucleus);GO:0005737(cytoplasm);GO:0042787(protein ubiquitination involved in ubiquitin-dependent protein catabolic process)	ko04120(Ubiquitin mediated proteolysis)	UPL1	4	3525-3543	N
blu-miR13-3p	TGCCATCCTCCTGTGACAAC	TRINITY_DN38839_c0_g1	-	-	-	-	4	250-269	N
blu-miR13-3p	TGCCATCCTCCTGTGACAAC	TRINITY_DN56255_c0_g1	PREDICTED: rop guanine nucleotide exchange factor 14 [Juglans regia]	GO:0005089(Rho guanyl-nucleotide exchange factor activity);GO:0005739(mitochondrion);GO:0005886(plasma membrane);GO:0080092(regulation of pollen tube growth)	-	ROPGEF14	3.5	642-660	N
blu-miR13-3p	TGCCATCCTCCTGTGACAAC	TRINITY_DN56282_c0_g1	hypothetical protein PRUPE_ppa000581mg [Prunus persica]	GO:0005388(calcium-transporting ATPase activity);GO:0005887(integral component of plasma membrane);GO:0043231(intracellular membrane-bounded organelle)	-	ACA9	4	745-763	N
blu-miR15-5p	AACATCCCAGGACACATGAACAGT	TRINITY_DN41276_c0_g2	-	-	-	-	4	189-212	N
blu-miR16-3p	TTAAATAAGAGAACTGGCTCC	TRINITY_DN42257_c1_g2	-	-	-	-	4	284-304	N
blu-miR18-3p	TTTTTTCGAGCACGGATT	TRINITY_DN20100_c0_g1	-	-	-	-	4	49-65	N
blu-miR18-3p	TTTTTTCGAGCACGGATT	TRINITY_DN2473_c0_g1	H/ACA ribonucleoprotein complex subunit 1 [Anthurium amnicola]	GO:0001522(pseudouridine synthesis);GO:0005730(nucleolus);GO:0009982(pseudouridine synthase activity);GO:0030515(snoRNA binding);GO:0031120(snRNA pseudouridine synthesis);GO:0031429(box H/ACA snoRNP complex);GO:0042254(ribosome biogenesis)	ko03008(Ribosome biogenesis in eukaryotes)	GAR1	4	247-264	N
blu-miR18-3p	TTTTTTCGAGCACGGATT	TRINITY_DN27174_c0_g1	PREDICTED: transcription factor bHLH147-like [Juglans regia]	GO:0003700(transcription factor activity, sequence-specific DNA binding);GO:0005634(nucleus);GO:0006355(regulation of transcription, DNA-templated);GO:0046983(protein dimerization activity)	-	-	4	310-326	N
blu-miR18-3p	TTTTTTCGAGCACGGATT	TRINITY_DN35373_c0_g1	PREDICTED: transcription factor bHLH36-like [Juglans regia]	GO:0000977(RNA polymerase II regulatory region sequence-specific DNA binding);GO:0003700(transcription factor activity, sequence-specific DNA binding);GO:0006357(regulation of transcription from RNA polymerase II promoter);GO:0090575(RNA polymerase II transcription factor complex)	-	BHLH36	4	634-650	N
blu-miR18-3p	TTTTTTCGAGCACGGATT	TRINITY_DN35937_c0_g1	microsomal omega-3 fatty acid desaturase [Betula pendula]	GO:0006636(unsaturated fatty acid biosynthetic process);GO:0016717(oxidoreductase activity, acting on paired donors, with oxidation of a pair of donors resulting in the reduction of molecular oxygen to two molecules of water)	ko01212(Fatty acid metabolism);ko01040(Biosynthesis of unsaturated fatty acids)	FAD7A-1	4	304-321	N
blu-miR18-3p	TTTTTTCGAGCACGGATT	TRINITY_DN37447_c2_g6	unknown [Medicago truncatula]	GO:0003735(structural constituent of ribosome);GO:0006412(translation);GO:0022627(cytosolic small ribosomal subunit)	ko03010(Ribosome)	rps23	3.5	184-201	N
blu-miR18-3p	TTTTTTCGAGCACGGATT	TRINITY_DN37598_c0_g1	PREDICTED: NAP1-related protein 2 [Juglans regia]	GO:0003677(DNA binding);GO:0003682(chromatin binding);GO:0005634(nucleus);GO:0005737(cytoplasm);GO:0005829(cytosol);GO:0006334(nucleosome assembly);GO:0008283(cell proliferation);GO:0010311(lateral root formation);GO:0016444(somatic cell DNA recombination);GO:0030154(cell differentiation);GO:0042393(histone binding);GO:0046686(response to cadmium ion)	-	NRP1	4	207-224	N
blu-miR18-3p	TTTTTTCGAGCACGGATT	TRINITY_DN39259_c0_g4	hypothetical protein EUTSA_v10021457mg [Eutrema salsugineum]	GO:0000166(nucleotide binding);GO:0005654(nucleoplasm);GO:0005829(cytosol);GO:0006376(mRNA splice site selection);GO:0016482(cytosolic transport);GO:0044822(poly(A) RNA binding);GO:0048025(negative regulation of mRNA splicing, via spliceosome)	ko03040(Spliceosome)	SRSF10	4	309-326	N
blu-miR18-3p	TTTTTTCGAGCACGGATT	TRINITY_DN40257_c0_g1	hypothetical protein CICLE_v10016806mg [Citrus clementina]	GO:0005829(cytosol);GO:0030366(molybdopterin synthase activity);GO:0032324(molybdopterin cofactor biosynthetic process)	ko00790(Folate biosynthesis);ko04122(Sulfur relay system)	MOCS2	4	914-931	N
blu-miR18-3p	TTTTTTCGAGCACGGATT	TRINITY_DN40742_c0_g1	PREDICTED: esterase AGAP003155 [Juglans regia]	GO:0005777(peroxisome);GO:0008150(biological_process);GO:0009507(chloroplast);GO:0016787(hydrolase activity)	ko04070(Phosphatidylinositol signaling system);ko04626(Plant-pkogen interaction)	OVCA2	2.5	156-173	N
blu-miR18-3p	TTTTTTCGAGCACGGATT	TRINITY_DN40932_c0_g2	PREDICTED: phosphatidylinositol 4-kinase gamma 4-like [Juglans regia]	GO:0004430(1-phosphatidylinositol 4-kinase activity);GO:0004674(protein serine/threonine kinase activity);GO:0005524(ATP binding);GO:0005829(cytosol);GO:0009507(chloroplast);GO:0009651(response to salt stress);GO:0016020(membrane);GO:0016301(kinase activity);GO:0016310(phosphorylation);GO:0016773(phosphotransferase activity, alcohol group as acceptor);GO:0046777(protein autophosphorylation);GO:00…	ko03008(Ribosome biogenesis in eukaryotes)	PI4KG4	2	774-791	N
blu-miR18-3p	TTTTTTCGAGCACGGATT	TRINITY_DN41866_c0_g7	PREDICTED: IRK-interacting protein [Juglans regia]	GO:0008150(biological_process);GO:0009507(chloroplast)	-	IRKI	4	751-768	N
blu-miR18-3p	TTTTTTCGAGCACGGATT	TRINITY_DN43540_c0_g4	40S ribosomal protein S23 [Anthurium amnicola]	GO:0003735(structural constituent of ribosome);GO:0006412(translation);GO:0022627(cytosolic small ribosomal subunit)	ko03010(Ribosome)	RPS23A	4	144-161	N
blu-miR18-3p	TTTTTTCGAGCACGGATT	TRINITY_DN43841_c0_g5	PREDICTED: D-lactate dehydrogenase [cytochrome], mitochondrial [Capsicum annuum]	GO:0004458(D-lactate dehydrogenase (cytochrome) activity);GO:0005524(ATP binding);GO:0005739(mitochondrion);GO:0008720(D-lactate dehydrogenase activity);GO:0008891(glycolate oxidase activity);GO:0019154(glycolate dehydrogenase activity);GO:0042802(identical protein binding);GO:0050660(flavin adenine dinucleotide binding);GO:0051596(methylglyoxal catabolic process);GO:0055114(oxidation-reduction p…	ko00620(Pyruvate metabolism)	DLD	3.5	222-240	N
blu-miR18-3p	TTTTTTCGAGCACGGATT	TRINITY_DN43926_c0_g5	-	-	-	-	4	14-30	N
blu-miR18-3p	TTTTTTCGAGCACGGATT	TRINITY_DN44113_c0_g3	PREDICTED: histone deacetylase HDT1 isoform X3 [Juglans regia]	GO:0003676(nucleic acid binding);GO:0004407(histone deacetylase activity);GO:0005634(nucleus);GO:0005730(nucleolus);GO:0006351(transcription, DNA-templated);GO:0007275(multicellular organism development);GO:0008270(zinc ion binding);GO:0009414(response to water deprivation);GO:0009651(response to salt stress);GO:0009737(response to abscisic acid);GO:0016568(chromatin modification);GO:0016787(hydr…	-	HDT1	4	207-225	N
blu-miR18-3p	TTTTTTCGAGCACGGATT	TRINITY_DN44852_c0_g2	PREDICTED: uncharacterized protein LOC100263717 [Vitis vinifera]	GO:0005634(nucleus);GO:0005737(cytoplasm)	ko04140(Rkolation of autophagy)	-	4	886-903	N
blu-miR18-3p	TTTTTTCGAGCACGGATT	TRINITY_DN46503_c0_g2	-	-	-	-	4	60-77	N
blu-miR18-3p	TTTTTTCGAGCACGGATT	TRINITY_DN49858_c1_g3	PREDICTED: probable inactive leucine-rich repeat receptor-like protein kinase At3g03770 isoform X1 [Juglans regia]	GO:0004672(protein kinase activity);GO:0004674(protein serine/threonine kinase activity);GO:0005524(ATP binding);GO:0005886(plasma membrane);GO:0006468(protein phosphorylation);GO:0007169(transmembrane receptor protein tyrosine kinase signaling pathway);GO:0016021(integral component of membrane)	ko04075(Plant hormone signal transduction);ko04626(Plant-pkogen interaction)	At3g03770	4	3719-3736	N
blu-miR18-3p	TTTTTTCGAGCACGGATT	TRINITY_DN50043_c0_g2	PREDICTED: uncharacterized protein LOC18586776 [Theobroma cacao]	-	-	-	4	187-203	N
blu-miR18-3p	TTTTTTCGAGCACGGATT	TRINITY_DN50242_c0_g2	PREDICTED: peptidyl-prolyl cis-trans isomerase FKBP20-2, chloroplastic [Juglans regia]	GO:0003755(peptidyl-prolyl cis-trans isomerase activity);GO:0005528(FK506 binding);GO:0005789(endoplasmic reticulum membrane);GO:0061077(chaperone-mediated protein folding)	-	FKBP20-2	4	239-256	N
blu-miR18-3p	TTTTTTCGAGCACGGATT	TRINITY_DN51660_c0_g1	PREDICTED: IQ domain-containing protein IQM1 [Ziziphus jujuba]	GO:0005516(calmodulin binding);GO:0005634(nucleus);GO:0005737(cytoplasm);GO:0008150(biological_process)	-	IQM5	4	254-272	N
blu-miR18-3p	TTTTTTCGAGCACGGATT	TRINITY_DN51725_c0_g5	PREDICTED: ankyrin repeat domain-containing protein, chloroplastic [Jatropha curcas]	GO:0005515(protein binding);GO:0005634(nucleus);GO:0009507(chloroplast);GO:0009793(embryo development ending in seed dormancy)	ko03040(Spliceosome)	AKRP	3	1004-1021	N
blu-miR18-3p	TTTTTTCGAGCACGGATT	TRINITY_DN52028_c1_g2	PREDICTED: uncharacterized protein LOC108997400 [Juglans regia]	GO:0005524(ATP binding);GO:0005737(cytoplasm);GO:0008360(regulation of cell shape);GO:0009058(biosynthetic process);GO:0009295(nucleoid);GO:0009507(chloroplast);GO:0009658(chloroplast organization);GO:0010020(chloroplast fission);GO:0016874(ligase activity);GO:0016881(acid-amino acid ligase activity);GO:0051301(cell division)	-	murE	3.5	1827-1844	N
blu-miR18-3p	TTTTTTCGAGCACGGATT	TRINITY_DN52565_c0_g1	PREDICTED: D-lactate dehydrogenase [cytochrome], mitochondrial [Juglans regia]	GO:0004458(D-lactate dehydrogenase (cytochrome) activity);GO:0005524(ATP binding);GO:0005739(mitochondrion);GO:0008720(D-lactate dehydrogenase activity);GO:0008891(glycolate oxidase activity);GO:0019154(glycolate dehydrogenase activity);GO:0042802(identical protein binding);GO:0050660(flavin adenine dinucleotide binding);GO:0051596(methylglyoxal catabolic process);GO:0055114(oxidation-reduction p…	ko00620(Pyruvate metabolism)	DLD	3.5	12-30	N
blu-miR18-3p	TTTTTTCGAGCACGGATT	TRINITY_DN52924_c0_g2	PREDICTED: protein NAP1 isoform X1 [Juglans regia]	GO:0005515(protein binding);GO:0005634(nucleus);GO:0005789(endoplasmic reticulum membrane);GO:0005886(plasma membrane);GO:0007015(actin filament organization);GO:0009825(multidimensional cell growth);GO:0010090(trichome morphogenesis);GO:0031209(SCAR complex);GO:0045010(actin nucleation);GO:0045893(positive regulation of transcription, DNA-templated)	-	NAP1	4	2215-2232	N
blu-miR18-3p	TTTTTTCGAGCACGGATT	TRINITY_DN52928_c0_g6	-	-	-	-	3.5	459-477	N
blu-miR18-3p	TTTTTTCGAGCACGGATT	TRINITY_DN53358_c0_g1	PREDICTED: FHA domain-containing protein PS1 [Juglans regia]	GO:0005634(nucleus);GO:0009555(pollen development);GO:0051321(meiotic cell cycle)	-	PS1	3.5	2061-2078	N
blu-miR18-3p	TTTTTTCGAGCACGGATT	TRINITY_DN53875_c1_g6	-	-	-	-	3.5	422-439	N
blu-miR18-3p	TTTTTTCGAGCACGGATT	TRINITY_DN56166_c0_g1	PREDICTED: zinc finger BED domain-containing protein RICESLEEPER 2-like [Daucus carota subsp. sativus]	GO:0000977(RNA polymerase II regulatory region sequence-specific DNA binding);GO:0003700(transcription factor activity, sequence-specific DNA binding);GO:0005634(nucleus);GO:0006357(regulation of transcription from RNA polymerase II promoter)	ko01230(Biosynthesis of amino acids);ko00260(Glycine, serine and threonine metabolism)	Os03g0733400	4	154-171	N
blu-miR18-3p	TTTTTTCGAGCACGGATT	TRINITY_DN56879_c0_g2	PREDICTED: putative potassium transporter 12 isoform X1 [Juglans regia]	GO:0015079(potassium ion transmembrane transporter activity);GO:0016020(membrane)	-	POT12	3	399-416	N
blu-miR2-3p	TGCTGGCAGAGGCAAAAGAAG	TRINITY_DN56321_c0_g1	PREDICTED: malonate--CoA ligase-like isoform X1 [Juglans regia]	GO:0005634(nucleus);GO:0005739(mitochondrion);GO:0005829(cytosol);GO:0006633(fatty acid biosynthetic process);GO:0016020(membrane);GO:0016208(AMP binding);GO:0090409(malonyl-CoA synthetase activity);GO:0090410(malonate catabolic process)	ko00280(Valine, leucine and isoleucine dkoadation)	AAE13	4	535-554	N
blu-miR2-5p	TCTTTTGCCTCTGTCAACATA	TRINITY_DN41246_c0_g4	PREDICTED: E3 ubiquitin-protein ligase UPL5 [Juglans regia]	GO:0004842(ubiquitin-protein transferase activity);GO:0005634(nucleus);GO:0005737(cytoplasm);GO:0042787(protein ubiquitination involved in ubiquitin-dependent protein catabolic process)	ko04120(Ubiquitin mediated proteolysis);ko04144(Endocytosis)	UPL5	4	1770-1790	N
blu-miR2-5p	TCTTTTGCCTCTGTCAACATA	TRINITY_DN45748_c0_g4	PREDICTED: serine/threonine-protein kinase SRK2A [Juglans regia]	GO:0004674(protein serine/threonine kinase activity);GO:0005634(nucleus);GO:0005737(cytoplasm);GO:0006468(protein phosphorylation);GO:0035556(intracellular signal transduction)	ko04075(Plant hormone signal transduction)	SRK2A	4	253-272	N
blu-miR2-5p	TCTTTTGCCTCTGTCAACATA	TRINITY_DN48942_c0_g5	PREDICTED: CDPK-related kinase 3 isoform X1 [Juglans regia]	GO:0004683(calmodulin-dependent protein kinase activity);GO:0005516(calmodulin binding);GO:0005634(nucleus);GO:0005737(cytoplasm);GO:0005886(plasma membrane);GO:0009738(abscisic acid-activated signaling pathway);GO:0009931(calcium-dependent protein serine/threonine kinase activity);GO:0018105(peptidyl-serine phosphorylation);GO:0035556(intracellular signal transduction);GO:0046777(protein autopho…	ko04626(Plant-pkogen interaction)	CRK3	4	871-891	N
blu-miR2-5p	TCTTTTGCCTCTGTCAACATA	TRINITY_DN49102_c0_g1	PREDICTED: dihydroneopterin aldolase 2-like [Juglans regia]	GO:0004150(dihydroneopterin aldolase activity);GO:0005829(cytosol);GO:0006760(folic acid-containing compound metabolic process);GO:0046654(tetrahydrofolate biosynthetic process);GO:0046656(folic acid biosynthetic process)	ko00790(Folate biosynthesis)	FOLB2	4	142-162	N
blu-miR2-5p	TCTTTTGCCTCTGTCAACATA	TRINITY_DN50086_c0_g3	-	-	-	-	4	67-87	N
blu-miR20-3p	TTCAAAAGGTTCTCGAAGGCTT	TRINITY_DN42203_c1_g2	-	-	-	-	4	243-264	N
blu-miR20-3p	TTCAAAAGGTTCTCGAAGGCTT	TRINITY_DN56506_c0_g1	PREDICTED: glycerol-3-phosphate acyltransferase, chloroplastic isoform X2 [Juglans regia]	GO:0004366(glycerol-3-phosphate O-acyltransferase activity);GO:0006655(phosphatidylglycerol biosynthetic process);GO:0009507(chloroplast);GO:0009536(plastid);GO:0009570(chloroplast stroma);GO:0016024(CDP-diacylglycerol biosynthetic process)	ko00561(Glycerolipid metabolism);ko00564(Glycerophospholipid metabolism)	-	4	706-728	N
blu-miR21-5p	TTGGAGCCATCCCCACTGCCC	TRINITY_DN50431_c0_g3	hypothetical protein MANES_02G075800 [Manihot esculenta]	GO:0003674(molecular_function);GO:0005634(nucleus);GO:0008150(biological_process)	-	-	3.5	599-619	N
blu-miR23-5p	TTGGGTTGAAAGGATCGGATC	TRINITY_DN26768_c0_g1	-	-	-	-	3.5	76-96	N
blu-miR23-5p	TTGGGTTGAAAGGATCGGATC	TRINITY_DN44035_c0_g1	PREDICTED: crooked neck-like protein 1 [Vigna angularis]	GO:0000245(spliceosomal complex assembly);GO:0000974(Prp19 complex);GO:0071010(prespliceosome);GO:0071011(precatalytic spliceosome);GO:0071012(catalytic step 1 spliceosome);GO:0071013(catalytic step 2 spliceosome);GO:0071014(post-mRNA release spliceosomal complex)	ko03040(Spliceosome)	CLF1	0	516-536	N
blu-miR23-5p	TTGGGTTGAAAGGATCGGATC	TRINITY_DN44168_c0_g2	PREDICTED: probable aspartyl protease At4g16563 [Juglans regia]	GO:0004190(aspartic-type endopeptidase activity);GO:0006508(proteolysis);GO:0030163(protein catabolic process)	-	nep2	4	1195-1214	N
blu-miR24-5p	ATGAATGTATTGGATTAGCCT	TRINITY_DN57295_c1_g3	PREDICTED: G-type lectin S-receptor-like serine/threonine-protein kinase At4g27290 isoform X2 [Juglans regia]	GO:0004674(protein serine/threonine kinase activity);GO:0005886(plasma membrane);GO:0006468(protein phosphorylation);GO:0006952(defense response);GO:0009506(plasmodesma)	ko00520(Amino sugar and nucleotide sugar metabolism)	SD11	4	114-134	N
blu-miR25-3p	CTGGAGGGACAGGAGAATGCC	TRINITY_DN48303_c0_g2	-	-	-	-	3.5	35-55	N
blu-miR25-3p	CTGGAGGGACAGGAGAATGCC	TRINITY_DN57019_c0_g4	Subtilisin-like protease CPC735_031240 [Anthurium amnicola]	GO:0004252(serine-type endopeptidase activity)	ko04141(Protein processing in endoplasmic reticulum)	CPC735_031240	3	1304-1325	N
blu-miR26-3p	TTATTGAAGGTTGCTGGGTGG	TRINITY_DN51384_c0_g2	PREDICTED: eugenol synthase 1-like [Juglans regia]	GO:0009807(lignan biosynthetic process);GO:0010283(pinoresinol reductase activity);GO:0010284(lariciresinol reductase activity);GO:1902123((-)-pinoresinol catabolic process);GO:1902125((+)-pinoresinol catabolic process);GO:1902128((-)-lariciresinol catabolic process);GO:1902129((-)-lariciresinol biosynthetic process);GO:1902132((+)-lariciresinol biosynthetic process);GO:1902135((+)-secoisolaricir…	ko00941(Flavonoid biosynthesis)	EGS1	4	88-108	N
blu-miR26-3p	TTATTGAAGGTTGCTGGGTGG	TRINITY_DN62200_c0_g1	-	-	-	-	4	1268-1287	N
blu-miR28-5p	TTATAGTCCTCTATTCGCAAT	TRINITY_DN36043_c0_g1	Ribosomal protein L18, component of cytosolic 80S ribosome and 60S large subunit [Ostreococcus lucimarinus CCE9901]	GO:0003723(RNA binding);GO:0003735(structural constituent of ribosome);GO:0006412(translation);GO:0022625(cytosolic large ribosomal subunit)	ko03010(Ribosome)	RPL18	3.5	21-40	N
blu-miR28-5p	TTATAGTCCTCTATTCGCAAT	TRINITY_DN39083_c0_g4	predicted protein [Hordeum vulgare subsp. vulgare]	-	-	-	4	205-224	N
blu-miR29-3p	CATTCCTTCATGACTATCGGA	TRINITY_DN38683_c0_g1	PREDICTED: putative disease resistance protein At3g14460 isoform X1 [Juglans regia]	GO:0005515(protein binding);GO:0005524(ATP binding);GO:0005576(extracellular region);GO:0006952(defense response);GO:0043531(ADP binding)	-	RPPL1	3.5	355-374	N
blu-miR29-3p	CATTCCTTCATGACTATCGGA	TRINITY_DN42844_c1_g1	PREDICTED: probable protein arginine N-methyltransferase 1 [Juglans regia]	GO:0005829(cytosol);GO:0006355(regulation of transcription, DNA-templated);GO:0008469(histone-arginine N-methyltransferase activity);GO:0035242(protein-arginine omega-N asymmetric methyltransferase activity)	-	PRMT1	4	286-306	N
blu-miR29-3p	CATTCCTTCATGACTATCGGA	TRINITY_DN53676_c0_g1	PREDICTED: guanylate kinase 2-like isoform X2 [Juglans regia]	GO:0004385(guanylate kinase activity);GO:0005524(ATP binding);GO:0005737(cytoplasm);GO:0009117(nucleotide metabolic process);GO:0016310(phosphorylation);GO:0048229(gametophyte development);GO:0048638(regulation of developmental growth)	ko00230(Purine metabolism)	GK-2	3.5	960-979	N
blu-miR3-3p	CATTCCATCATGGTCATCGTG	TRINITY_DN49587_c0_g4	-	-	-	-	4	25-44	N
blu-miR3-5p	CGATGACCATGATGGAATGCA	TRINITY_DN46850_c0_g4	-	-	-	-	4	564-585	N
blu-miR3-5p	CGATGACCATGATGGAATGCA	TRINITY_DN51388_c0_g2	PREDICTED: pectinesterase 3 [Cucumis sativus]	GO:0030599(pectinesterase activity);GO:0046910(pectinesterase inhibitor activity);GO:0071944(cell periphery)	ko00040(Pentose and glucuronate interconversions);ko00500(Starch and sucrose metabolism)	PME1	3.5	318-338	N
blu-miR30-3p	TTCAAAACAAGCCAACAGGAT	TRINITY_DN41285_c1_g11	PREDICTED: uncharacterized protein LOC108993585 [Juglans regia]	-	-	-	3.5	611-632	N
blu-miR30-3p	TTCAAAACAAGCCAACAGGAT	TRINITY_DN48810_c0_g6	-	-	-	-	4	77-97	N
blu-miR30-3p	TTCAAAACAAGCCAACAGGAT	TRINITY_DN54949_c0_g2	PREDICTED: probable inactive purple acid phosphatase 29 isoform X3 [Juglans regia]	GO:0003993(acid phosphatase activity);GO:0004722(protein serine/threonine phosphatase activity);GO:0005576(extracellular region);GO:0016311(dephosphorylation);GO:0046872(metal ion binding)	ko03040(Spliceosome)	PAP29	3	377-397	N
blu-miR30-3p	TTCAAAACAAGCCAACAGGAT	TRINITY_DN55363_c0_g3	PREDICTED: probable protein phosphatase 2C 60 [Juglans regia]	GO:0004722(protein serine/threonine phosphatase activity);GO:0005634(nucleus);GO:0005886(plasma membrane);GO:0006470(protein dephosphorylation);GO:0046872(metal ion binding)	-	Os02g0180000	4	832-852	N
blu-miR30-3p	TTCAAAACAAGCCAACAGGAT	TRINITY_DN55761_c0_g1	hypothetical protein CICLE_v10007996mg [Citrus clementina]	GO:0008422(beta-glucosidase activity);GO:1901657(glycosyl compound metabolic process)	ko00500(Starch and sucrose metabolism);ko00460(Cyanoamino acid metabolism);ko00940(Phenylpropanoid biosynthesis)	BGLU18	4	532-551	N
blu-miR31-3p	TTTTCAAGGACCGGCTCCCCT	TRINITY_DN37425_c0_g3	PREDICTED: uncharacterized protein LOC109001273 [Juglans regia]	GO:0003674(molecular_function);GO:0005739(mitochondrion);GO:0008150(biological_process)	-	-	3	1-21	N
blu-miR31-3p	TTTTCAAGGACCGGCTCCCCT	TRINITY_DN43615_c0_g2	PREDICTED: uncharacterized protein LOC109020495 isoform X1 [Juglans regia]	GO:0016787(hydrolase activity)	-	-	4	48-69	N
blu-miR32-3p	TCAAATGTGAGGGTGTCGGAC	TRINITY_DN55198_c0_g2	unknown [Populus trichocarpa x Populus deltoides]	GO:0003674(molecular_function);GO:0005747(mitochondrial respiratory chain complex I);GO:0009853(photorespiration);GO:0016021(integral component of membrane);GO:0031966(mitochondrial membrane);GO:0045271(respiratory chain complex I)	-	-	1	3150-3170	N
blu-miR32-3p	TCAAATGTGAGGGTGTCGGAC	TRINITY_DN57308_c0_g2	-	-	-	-	4	247-268	N
blu-miR4-3p	ATGAAATCAATTTGTCTCACC	TRINITY_DN41333_c0_g4	-	-	-	-	4	87-108	N
blu-miR4-3p	ATGAAATCAATTTGTCTCACC	TRINITY_DN48936_c0_g2	-	-	-	-	4	478-498	N
blu-miR4-3p	ATGAAATCAATTTGTCTCACC	TRINITY_DN52141_c0_g6	uncharacterized protein LOC100499867 [Glycine max]	GO:0005750(mitochondrial respiratory chain complex III);GO:0006122(mitochondrial electron transport, ubiquinol to cytochrome c);GO:0008121(ubiquinol-cytochrome-c reductase activity);GO:0009060(aerobic respiration);GO:0034551(mitochondrial respiratory chain complex III assembly)	ko00190(Oxidative phosphorylation)	QCR7-2	3.5	573-593	N
blu-miR4-3p	ATGAAATCAATTTGTCTCACC	TRINITY_DN61440_c0_g1	putative 60S ribosomal protein L37-A, partial [Anthurium amnicola]	GO:0003723(RNA binding);GO:0003735(structural constituent of ribosome);GO:0006412(translation);GO:0022625(cytosolic large ribosomal subunit)	ko03010(Ribosome)	RpL37	3.5	22-41	N
blu-miR4-5p	TGAGACAAGATTGATTTCATTC	TRINITY_DN44717_c0_g7	-	-	-	-	3.5	2-23	N
blu-miR5-3p	CAACTTCATCTTTCATAAACC	TRINITY_DN38068_c0_g2	PREDICTED: serine/arginine-rich splicing factor RSZ21 [Juglans regia]	GO:0000166(nucleotide binding);GO:0000398(mRNA splicing, via spliceosome);GO:0003676(nucleic acid binding);GO:0005515(protein binding);GO:0005634(nucleus);GO:0005681(spliceosomal complex);GO:0008270(zinc ion binding);GO:0016607(nuclear speck)	ko03040(Spliceosome)	RSZ21	3	1042-1061	N
blu-miR5-3p	CAACTTCATCTTTCATAAACC	TRINITY_DN39024_c0_g4	PREDICTED: glycerol-3-phosphate dehydrogenase SDP6, mitochondrial-like [Juglans regia]	GO:0004368(glycerol-3-phosphate dehydrogenase activity);GO:0005739(mitochondrion);GO:0005743(mitochondrial inner membrane);GO:0006071(glycerol metabolic process);GO:0006072(glycerol-3-phosphate metabolic process);GO:0006127(glycerophosphate shuttle);GO:0009331(glycerol-3-phosphate dehydrogenase complex);GO:0019563(glycerol catabolic process);GO:0052591(sn-glycerol-3-phosphate:ubiquinone-8 oxidore…	ko00564(Glycerophospholipid metabolism)	SDP6	3	589-609	N
blu-miR5-3p	CAACTTCATCTTTCATAAACC	TRINITY_DN50148_c0_g6	PREDICTED: probable mediator of RNA polymerase II transcription subunit 26c [Juglans regia]	GO:0006368(transcription elongation from RNA polymerase II promoter);GO:0070449(elongin complex)	-	MED26C	4	1628-1649	N
blu-miR5-3p	CAACTTCATCTTTCATAAACC	TRINITY_DN54887_c0_g1	-	-	-	-	3.5	922-941	N
blu-miR5-5p	TTTATGGAGGAAGAAGTTGCA	TRINITY_DN41644_c0_g1	-	-	-	-	4	135-155	N
blu-miR5-5p	TTTATGGAGGAAGAAGTTGCA	TRINITY_DN43946_c0_g1	PREDICTED: uncharacterized protein LOC109004035 [Juglans regia]	GO:0008270(zinc ion binding);GO:0047134(protein-disulfide reductase activity);GO:0055114(oxidation-reduction process)	-	-	3.5	259-279	N
blu-miR5-5p	TTTATGGAGGAAGAAGTTGCA	TRINITY_DN44260_c0_g1	PREDICTED: uncharacterized protein LOC109013386 isoform X2 [Juglans regia]	GO:0005634(nucleus);GO:0047134(protein-disulfide reductase activity);GO:0055114(oxidation-reduction process)	-	-	4	95-115	N
blu-miR5-5p	TTTATGGAGGAAGAAGTTGCA	TRINITY_DN47735_c0_g5	PREDICTED: choline transporter-like protein 2 [Ziziphus jujuba]	GO:0005634(nucleus);GO:0005802(trans-Golgi network);GO:0005886(plasma membrane);GO:0009506(plasmodesma);GO:0009524(phragmoplast);GO:0010051(xylem and phloem pattern formation);GO:0010088(phloem development);GO:0015220(choline transmembrane transporter activity);GO:0015871(choline transport);GO:0016021(integral component of membrane);GO:0048364(root development);GO:0090603(sieve element differenti…	-	slc44a2	4	1518-1538	N
blu-miR5-5p	TTTATGGAGGAAGAAGTTGCA	TRINITY_DN50923_c0_g1	PREDICTED: uncharacterized protein LOC109011949 [Juglans regia]	GO:0005634(nucleus)	-	-	3.5	313-333	N
blu-miR5-5p	TTTATGGAGGAAGAAGTTGCA	TRINITY_DN56899_c0_g1	PREDICTED: uncharacterized protein LOC109019790 [Juglans regia]	GO:0005634(nucleus)	-	-	3.5	619-639	N
blu-miR5-5p	TTTATGGAGGAAGAAGTTGCA	TRINITY_DN57300_c1_g2	PREDICTED: uncharacterized protein LOC109011949 [Juglans regia]	GO:0005634(nucleus);GO:0009411(response to UV);GO:0009414(response to water deprivation);GO:0009651(response to salt stress);GO:0009739(response to gibberellin);GO:0009751(response to salicylic acid);GO:0010200(response to chitin);GO:0047134(protein-disulfide reductase activity);GO:0055114(oxidation-reduction process)	-	-	4	561-581	N
blu-miR6-3p	TTTTCGGTGTGCTCTCCTATT	TRINITY_DN35899_c0_g1	PREDICTED: expansin-A11-like isoform X2 [Juglans regia]	GO:0005576(extracellular region);GO:0005618(cell wall);GO:0009664(plant-type cell wall organization);GO:0009826(unidimensional cell growth);GO:0009828(plant-type cell wall loosening);GO:0009831(plant-type cell wall modification involved in multidimensional cell growth);GO:0016020(membrane)	-	EXPA11	4	1090-1109	N
blu-miR6-3p	TTTTCGGTGTGCTCTCCTATT	TRINITY_DN51366_c1_g3	-	-	-	-	4	129-149	N
blu-miR6-5p	TAGGAGAGCACATCGAAGACT	TRINITY_DN51477_c0_g3	-	-	-	-	4	412-433	N
blu-miR7-3p	CATCTGTTCTCCTTCAAAATT	TRINITY_DN43432_c0_g1	PREDICTED: disease resistance protein At4g27190-like [Juglans regia]	GO:0005524(ATP binding);GO:0005739(mitochondrion);GO:0006952(defense response);GO:0043531(ADP binding)	ko04626(Plant-pkogen interaction)	At4g27190	4	421-441	N
blu-miR7-3p	CATCTGTTCTCCTTCAAAATT	TRINITY_DN47983_c0_g1	PREDICTED: FT-interacting protein 1-like [Juglans regia]	GO:0005509(calcium ion binding);GO:0005544(calcium-dependent phospholipid binding);GO:0005886(plasma membrane)	-	FTIP1	4	789-810	N
blu-miR7-3p	CATCTGTTCTCCTTCAAAATT	TRINITY_DN54446_c0_g1	PREDICTED: DIS3-like exonuclease 2 [Juglans regia]	GO:0000175(3'-5'-exoribonuclease activity);GO:0000176(nuclear exosome (RNase complex));GO:0000177(cytoplasmic exosome (RNase complex));GO:0000932(cytoplasmic mRNA processing body);GO:0006364(rRNA processing);GO:0006402(mRNA catabolic process);GO:0016075(rRNA catabolic process)	ko03018(RNA dkoadation)	SOV	4	1756-1776	N
blu-miR7-3p	CATCTGTTCTCCTTCAAAATT	TRINITY_DN54893_c0_g4	Ubiquitin supergroup [Ostreococcus tauri]	GO:0003674(molecular_function);GO:0005634(nucleus);GO:0005829(cytosol);GO:0008283(cell proliferation);GO:0019005(SCF ubiquitin ligase complex);GO:0030162(regulation of proteolysis);GO:0031647(regulation of protein stability);GO:0045116(protein neddylation);GO:0051438(regulation of ubiquitin-protein transferase activity)	ko00240(Pyrimidine metabolism);ko00250(Alanine, aspartate and glutamate metabolism)	nedd8	4	148-169	N
blu-miR7-5p	TTTGGAGGAGGACAAATGCAC	TRINITY_DN52164_c0_g2	PREDICTED: secretory carrier-associated membrane protein 4 [Juglans regia]	GO:0005739(mitochondrion);GO:0005794(Golgi apparatus);GO:0005886(plasma membrane);GO:0015031(protein transport);GO:0016021(integral component of membrane);GO:0022857(transmembrane transporter activity);GO:0030658(transport vesicle membrane)	-	SCAMP4	4	925-944	N
blu-miR7-5p	TTTGGAGGAGGACAAATGCAC	TRINITY_DN52796_c0_g6	PREDICTED: uncharacterized protein LOC109010488 [Juglans regia]	GO:0003674(molecular_function);GO:0008150(biological_process)	-	-	4	191-210	N
blu-miR7-5p	TTTGGAGGAGGACAAATGCAC	TRINITY_DN55550_c0_g3	hypothetical protein CICLE_v10000140mg [Citrus clementina]	GO:0004722(protein serine/threonine phosphatase activity);GO:0005739(mitochondrion);GO:0016021(integral component of membrane);GO:0016787(hydrolase activity)	-	-	4	1234-1253	N
blu-miR7-5p	TTTGGAGGAGGACAAATGCAC	TRINITY_DN55550_c0_g4	PREDICTED: uncharacterized protein LOC107420920 isoform X1 [Ziziphus jujuba]	GO:0004722(protein serine/threonine phosphatase activity);GO:0005739(mitochondrion);GO:0016021(integral component of membrane);GO:0016787(hydrolase activity)	-	-	4	399-418	N
blu-miR7-5p	TTTGGAGGAGGACAAATGCAC	TRINITY_DN56282_c0_g1	hypothetical protein PRUPE_ppa000581mg [Prunus persica]	GO:0005388(calcium-transporting ATPase activity);GO:0005887(integral component of plasma membrane);GO:0043231(intracellular membrane-bounded organelle)	-	ACA9	4	1894-1914	N
blu-miR8-3p	TTTGCAGACGCACTTGAATCG	TRINITY_DN44551_c0_g2	hypothetical protein POPTR_0006s18580g [Populus trichocarpa]	GO:0004842(ubiquitin-protein transferase activity);GO:0019005(SCF ubiquitin ligase complex);GO:0031146(SCF-dependent proteasomal ubiquitin-dependent protein catabolic process)	ko00970(Aminoacyl-tRNA biosynthesis)	At4g09190	3.5	790-810	N
blu-miR8-3p	TTTGCAGACGCACTTGAATCG	TRINITY_DN45819_c1_g1	hypothetical protein PRUPE_ppa005568mg [Prunus persica]	GO:0004842(ubiquitin-protein transferase activity);GO:0019005(SCF ubiquitin ligase complex);GO:0031146(SCF-dependent proteasomal ubiquitin-dependent protein catabolic process)	ko00970(Aminoacyl-tRNA biosynthesis)	-	3.5	107-127	N
blu-miR8-3p	TTTGCAGACGCACTTGAATCG	TRINITY_DN48649_c0_g1	PREDICTED: F-box/kelch-repeat protein At3g23880-like [Nicotiana tomentosiformis]	GO:0004842(ubiquitin-protein transferase activity);GO:0019005(SCF ubiquitin ligase complex);GO:0031146(SCF-dependent proteasomal ubiquitin-dependent protein catabolic process)	ko00970(Aminoacyl-tRNA biosynthesis)	At1g47790	3.5	54-74	N
blu-miR8-3p	TTTGCAGACGCACTTGAATCG	TRINITY_DN48671_c0_g6	PREDICTED: F-box/kelch-repeat protein At3g23880-like [Juglans regia]	GO:0004842(ubiquitin-protein transferase activity);GO:0019005(SCF ubiquitin ligase complex);GO:0031146(SCF-dependent proteasomal ubiquitin-dependent protein catabolic process)	ko00970(Aminoacyl-tRNA biosynthesis)	FBX8	2	145-165	N
blu-miR8-3p	TTTGCAGACGCACTTGAATCG	TRINITY_DN49534_c0_g3	hypothetical protein PRUPE_ppa024547mg [Prunus persica]	GO:0004842(ubiquitin-protein transferase activity);GO:0019005(SCF ubiquitin ligase complex);GO:0031146(SCF-dependent proteasomal ubiquitin-dependent protein catabolic process)	ko00970(Aminoacyl-tRNA biosynthesis)	At1g53790	3.5	334-355	N
blu-miR8-3p	TTTGCAGACGCACTTGAATCG	TRINITY_DN51013_c0_g1	unnamed protein product [Coffea canephora]	GO:0004842(ubiquitin-protein transferase activity);GO:0019005(SCF ubiquitin ligase complex);GO:0031146(SCF-dependent proteasomal ubiquitin-dependent protein catabolic process)	ko00970(Aminoacyl-tRNA biosynthesis)	At3g06240	3	370-390	N
blu-miR8-3p	TTTGCAGACGCACTTGAATCG	TRINITY_DN52098_c0_g1	PREDICTED: F-box/kelch-repeat protein At3g23880-like [Juglans regia]	GO:0004842(ubiquitin-protein transferase activity);GO:0019005(SCF ubiquitin ligase complex);GO:0031146(SCF-dependent proteasomal ubiquitin-dependent protein catabolic process)	ko00970(Aminoacyl-tRNA biosynthesis)	CPR30	2	83-102	N
blu-miR8-5p	CAACATAGTTTTCTTCAGCTGT	TRINITY_DN43270_c0_g1	PREDICTED: 5'-3' exoribonuclease 3 [Vitis vinifera]	GO:0003676(nucleic acid binding);GO:0004534(5'-3' exoribonuclease activity);GO:0005634(nucleus);GO:0006397(mRNA processing);GO:0008270(zinc ion binding);GO:0010587(miRNA catabolic process)	ko03008(Ribosome biogenesis in eukaryotes);ko03018(RNA dkoadation)	XRN3	4	4411-4432	N
blu-miR8-5p	CAACATAGTTTTCTTCAGCTGT	TRINITY_DN50972_c0_g3	PREDICTED: DNA-directed RNA polymerase subunit 10-like protein [Tarenaya hassleriana]	GO:0001054(RNA polymerase I activity);GO:0001055(RNA polymerase II activity);GO:0001056(RNA polymerase III activity);GO:0005665(DNA-directed RNA polymerase II, core complex);GO:0005666(DNA-directed RNA polymerase III complex);GO:0005736(DNA-directed RNA polymerase I complex);GO:0008270(zinc ion binding)	ko00230(Purine metabolism);ko00240(Pyrimidine metabolism);ko03020(RNA polymerase)	-	4	566-586	N
blu-miR8-5p	CAACATAGTTTTCTTCAGCTGT	TRINITY_DN53035_c0_g1	hypothetical protein M569_00248, partial [Genlisea aurea]	-	-	-	4	272-292	N
miR1432a	TCAGGAAAGATGACACCGA	TRINITY_DN13942_c0_g1	-	-	-	-	3.5	175-194	N
miR1432a	TCAGGAAAGATGACACCGA	TRINITY_DN23709_c0_g1	-	GO:0000290(deadenylation-dependent decapping of nuclear-transcribed mRNA);GO:0003674(molecular_function);GO:0005634(nucleus);GO:0005829(cytosol)	-	CCR4	3	226-244	N
miR1432a	TCAGGAAAGATGACACCGA	TRINITY_DN37110_c0_g1	PREDICTED: phosphoglycerate mutase-like protein 1 isoform X1 [Juglans regia]	GO:0005829(cytosol);GO:0050278(sedoheptulose-bisphosphatase activity)	-	At5g64460	4	1681-1699	N
miR1432a	TCAGGAAAGATGACACCGA	TRINITY_DN3828_c0_g1	Cytochrome c oxidase polypeptide 5, mitochondrial, partial [Anthurium amnicola]	GO:0004129(cytochrome-c oxidase activity);GO:0005751(mitochondrial respiratory chain complex IV);GO:0006123(mitochondrial electron transport, cytochrome c to oxygen)	-	cya-4	4	386-403	N
miR1432a	TCAGGAAAGATGACACCGA	TRINITY_DN39326_c0_g1	PREDICTED: heavy metal-associated isoprenylated plant protein 3 [Juglans regia]	GO:0005737(cytoplasm);GO:0030001(metal ion transport);GO:0046914(transition metal ion binding);GO:0046916(cellular transition metal ion homeostasis)	-	HIPP01	4	140-159	N
miR1432a	TCAGGAAAGATGACACCGA	TRINITY_DN39982_c2_g1	PREDICTED: oligopeptide transporter 4 [Capsicum annuum]	GO:0006857(oligopeptide transport);GO:0015031(protein transport);GO:0015198(oligopeptide transporter activity);GO:0015833(peptide transport);GO:0016020(membrane);GO:0016021(integral component of membrane);GO:0055085(transmembrane transport);GO:0080167(response to karrikin)	-	OPT4	4	634-652	N
miR1432a	TCAGGAAAGATGACACCGA	TRINITY_DN40542_c1_g8	PREDICTED: 40S ribosomal protein S13-like [Pyrus x bretschneideri]	GO:0003729(mRNA binding);GO:0003735(structural constituent of ribosome);GO:0005730(nucleolus);GO:0005925(focal adhesion);GO:0006412(translation);GO:0016020(membrane);GO:0022627(cytosolic small ribosomal subunit);GO:0033119(negative regulation of RNA splicing);GO:0070062(extracellular exosome);GO:0070181(small ribosomal subunit rRNA binding)	ko03010(Ribosome)	RPS13	4	199-217	N
miR1432a	TCAGGAAAGATGACACCGA	TRINITY_DN42792_c0_g8	PREDICTED: rubisco accumulation factor 1, chloroplastic [Juglans regia]	GO:0009507(chloroplast);GO:0009570(chloroplast stroma);GO:0080158(chloroplast ribulose bisphosphate carboxylase complex biogenesis)	-	RAF1.2	3.5	1067-1085	N
miR1432a	TCAGGAAAGATGACACCGA	TRINITY_DN43456_c0_g3	PREDICTED: lysine-specific histone demethylase 1 homolog 3-like [Juglans regia]	GO:0003677(DNA binding);GO:0005634(nucleus);GO:0005739(mitochondrion);GO:0006351(transcription, DNA-templated);GO:0006355(regulation of transcription, DNA-templated);GO:0008131(primary amine oxidase activity);GO:0016491(oxidoreductase activity);GO:0016568(chromatin modification);GO:0055114(oxidation-reduction process)	ko00330(Arginine and proline metabolism);ko00410(beta-Alanine metabolism)	LDL3	4	3373-3391	N
miR1432a	TCAGGAAAGATGACACCGA	TRINITY_DN43668_c0_g1	hypothetical protein B456_009G400400 [Gossypium raimondii]	GO:0000028(ribosomal small subunit assembly);GO:0000122(negative regulation of transcription from RNA polymerase II promoter);GO:0000462(maturation of SSU-rRNA from tricistronic rRNA transcript (SSU-rRNA, 5.8S rRNA, LSU-rRNA));GO:0003735(structural constituent of ribosome);GO:0005730(nucleolus);GO:0005739(mitochondrion);GO:0005925(focal adhesion);GO:0006412(translation);GO:0006417(regulation of t…	ko03010(Ribosome)	RPS14	3.5	483-501	N
miR1432a	TCAGGAAAGATGACACCGA	TRINITY_DN44428_c0_g8	hypothetical protein Csa_3G849890 [Cucumis sativus]	GO:0003677(DNA binding);GO:0003700(transcription factor activity, sequence-specific DNA binding);GO:0005634(nucleus);GO:0006351(transcription, DNA-templated);GO:0006355(regulation of transcription, DNA-templated);GO:0010200(response to chitin);GO:0044212(transcription regulatory region DNA binding);GO:0046872(metal ion binding)	ko04712(Circadian rhythm - plant)	DOF1.7	3.5	314-332	N
miR1432a	TCAGGAAAGATGACACCGA	TRINITY_DN45918_c0_g17	60S ribosomal protein L11, partial [Anthurium amnicola]	GO:0000027(ribosomal large subunit assembly);GO:0003735(structural constituent of ribosome);GO:0006412(translation);GO:0022625(cytosolic large ribosomal subunit)	ko03010(Ribosome)	RPL11	4	608-626	N
miR1432a	TCAGGAAAGATGACACCGA	TRINITY_DN46591_c0_g2	PREDICTED: 1-acyl-sn-glycerol-3-phosphate acyltransferase-like isoform X1 [Juglans regia]	GO:0003841(1-acylglycerol-3-phosphate O-acyltransferase activity)	ko00561(Glycerolipid metabolism);ko00564(Glycerophospholipid metabolism)	-	4	1048-1067	N
miR1432a	TCAGGAAAGATGACACCGA	TRINITY_DN49164_c0_g3	PREDICTED: uncharacterized membrane protein At1g16860-like [Juglans regia]	GO:0005886(plasma membrane);GO:0006508(proteolysis);GO:0008233(peptidase activity);GO:0016021(integral component of membrane)	-	At1g16860	4	109-126	N
miR156a	TGACAGAAGAGAGTGAGCAC	TRINITY_DN37377_c2_g5	SBP-box transcription factor [Betula luminifera]	GO:0003677(DNA binding);GO:0003700(transcription factor activity, sequence-specific DNA binding);GO:0005634(nucleus);GO:0006351(transcription, DNA-templated);GO:0006355(regulation of transcription, DNA-templated);GO:0046872(metal ion binding);GO:0048653(anther development)	-	SPL13A	1	111-130	N
miR156a	TGACAGAAGAGAGTGAGCAC	TRINITY_DN37915_c0_g6	squamosa promoter binding-like protein [Betula platyphylla]	GO:0003677(DNA binding);GO:0003700(transcription factor activity, sequence-specific DNA binding);GO:0005634(nucleus);GO:0005737(cytoplasm);GO:0006351(transcription, DNA-templated);GO:0006355(regulation of transcription, DNA-templated);GO:0009908(flower development);GO:0010321(regulation of vegetative phase change);GO:0046872(metal ion binding)	ko04075(Plant hormone signal transduction)	SPL4	2	811-830	N
miR156a	TGACAGAAGAGAGTGAGCAC	TRINITY_DN40340_c1_g3	-	-	-	-	3	120-140	N
miR156a	TGACAGAAGAGAGTGAGCAC	TRINITY_DN43275_c0_g3	PREDICTED: putative ER lumen protein-retaining receptor C28H8.4 isoform X1 [Juglans regia]	GO:0004872(receptor activity);GO:0006621(protein retention in ER lumen);GO:0015031(protein transport);GO:0016021(integral component of membrane);GO:0046923(ER retention sequence binding)	-	KdelR	4	1655-1673	N
miR156a	TGACAGAAGAGAGTGAGCAC	TRINITY_DN44638_c0_g3	-	-	-	-	4	994-1012	N
miR156a	TGACAGAAGAGAGTGAGCAC	TRINITY_DN46822_c1_g2	PREDICTED: probable GABA transporter 2 [Juglans regia]	GO:0003333(amino acid transmembrane transport);GO:0015171(amino acid transmembrane transporter activity)	ko04075(Plant hormone signal transduction)	At5g41800	4	1457-1476	N
miR156a	TGACAGAAGAGAGTGAGCAC	TRINITY_DN49834_c0_g1	PREDICTED: UBP1-associated proteins 1C-like [Juglans regia]	GO:0003676(nucleic acid binding);GO:0005634(nucleus);GO:0008150(biological_process);GO:0008270(zinc ion binding)	-	UBA1C	4	10-28	N
miR156a	TGACAGAAGAGAGTGAGCAC	TRINITY_DN50148_c0_g7	FAD2 desaturase [Corylus avellana]	GO:0030176(integral component of endoplasmic reticulum membrane)	ko01212(Fatty acid metabolism);ko01040(Biosynthesis of unsaturated fatty acids)	FAD12	4	659-677	N
miR156a	TGACAGAAGAGAGTGAGCAC	TRINITY_DN52619_c1_g2	squamosa promoter binding protein-like 8 [Betula platyphylla]	GO:0003677(DNA binding);GO:0005634(nucleus);GO:0005737(cytoplasm);GO:0006351(transcription, DNA-templated);GO:0006355(regulation of transcription, DNA-templated);GO:0009554(megasporogenesis);GO:0009556(microsporogenesis);GO:0030154(cell differentiation);GO:0046872(metal ion binding);GO:0048653(anther development)	ko04075(Plant hormone signal transduction)	SPL8	2	984-1003	N
miR156a	TGACAGAAGAGAGTGAGCAC	TRINITY_DN52675_c0_g1	PREDICTED: uncharacterized protein LOC109021532 [Juglans regia]	GO:0000149(SNARE binding);GO:0000323(lytic vacuole);GO:0005768(endosome);GO:0035493(SNARE complex assembly);GO:0060627(regulation of vesicle-mediated transport)	-	-	4	122-141	N
miR156a	TGACAGAAGAGAGTGAGCAC	TRINITY_DN52910_c0_g6	PREDICTED: squamosa promoter-binding-like protein 12 [Juglans regia]	-	-	-	2	375-394	N
miR156a	TGACAGAAGAGAGTGAGCAC	TRINITY_DN54675_c1_g2	PREDICTED: squamosa promoter-binding-like protein 9 isoform X1 [Juglans regia]	GO:0003677(DNA binding);GO:0003700(transcription factor activity, sequence-specific DNA binding);GO:0005634(nucleus);GO:0005737(cytoplasm);GO:0006351(transcription, DNA-templated);GO:0006355(regulation of transcription, DNA-templated);GO:0010228(vegetative to reproductive phase transition of meristem);GO:0046872(metal ion binding);GO:0048366(leaf development);GO:0048653(anther development);GO:200…	-	SPL14	1	487-506	N
miR156b	TGACAGAAGAGAGTGAGCAC	TRINITY_DN37377_c2_g5	SBP-box transcription factor [Betula luminifera]	GO:0003677(DNA binding);GO:0003700(transcription factor activity, sequence-specific DNA binding);GO:0005634(nucleus);GO:0006351(transcription, DNA-templated);GO:0006355(regulation of transcription, DNA-templated);GO:0046872(metal ion binding);GO:0048653(anther development)	-	SPL13A	1	111-130	N
miR156b	TGACAGAAGAGAGTGAGCAC	TRINITY_DN37915_c0_g6	squamosa promoter binding-like protein [Betula platyphylla]	GO:0003677(DNA binding);GO:0003700(transcription factor activity, sequence-specific DNA binding);GO:0005634(nucleus);GO:0005737(cytoplasm);GO:0006351(transcription, DNA-templated);GO:0006355(regulation of transcription, DNA-templated);GO:0009908(flower development);GO:0010321(regulation of vegetative phase change);GO:0046872(metal ion binding)	ko04075(Plant hormone signal transduction)	SPL4	2	811-830	N
miR156b	TGACAGAAGAGAGTGAGCAC	TRINITY_DN40340_c1_g3	-	-	-	-	3	120-140	N
miR156b	TGACAGAAGAGAGTGAGCAC	TRINITY_DN43275_c0_g3	PREDICTED: putative ER lumen protein-retaining receptor C28H8.4 isoform X1 [Juglans regia]	GO:0004872(receptor activity);GO:0006621(protein retention in ER lumen);GO:0015031(protein transport);GO:0016021(integral component of membrane);GO:0046923(ER retention sequence binding)	-	KdelR	4	1655-1673	N
miR156b	TGACAGAAGAGAGTGAGCAC	TRINITY_DN44638_c0_g3	-	-	-	-	4	994-1012	N
miR156b	TGACAGAAGAGAGTGAGCAC	TRINITY_DN46822_c1_g2	PREDICTED: probable GABA transporter 2 [Juglans regia]	GO:0003333(amino acid transmembrane transport);GO:0015171(amino acid transmembrane transporter activity)	ko04075(Plant hormone signal transduction)	At5g41800	4	1457-1476	N
miR156b	TGACAGAAGAGAGTGAGCAC	TRINITY_DN49834_c0_g1	PREDICTED: UBP1-associated proteins 1C-like [Juglans regia]	GO:0003676(nucleic acid binding);GO:0005634(nucleus);GO:0008150(biological_process);GO:0008270(zinc ion binding)	-	UBA1C	4	10-28	N
miR156b	TGACAGAAGAGAGTGAGCAC	TRINITY_DN50148_c0_g7	FAD2 desaturase [Corylus avellana]	GO:0030176(integral component of endoplasmic reticulum membrane)	ko01212(Fatty acid metabolism);ko01040(Biosynthesis of unsaturated fatty acids)	FAD12	4	659-677	N
miR156b	TGACAGAAGAGAGTGAGCAC	TRINITY_DN52619_c1_g2	squamosa promoter binding protein-like 8 [Betula platyphylla]	GO:0003677(DNA binding);GO:0005634(nucleus);GO:0005737(cytoplasm);GO:0006351(transcription, DNA-templated);GO:0006355(regulation of transcription, DNA-templated);GO:0009554(megasporogenesis);GO:0009556(microsporogenesis);GO:0030154(cell differentiation);GO:0046872(metal ion binding);GO:0048653(anther development)	ko04075(Plant hormone signal transduction)	SPL8	2	984-1003	N
miR156b	TGACAGAAGAGAGTGAGCAC	TRINITY_DN52675_c0_g1	PREDICTED: uncharacterized protein LOC109021532 [Juglans regia]	GO:0000149(SNARE binding);GO:0000323(lytic vacuole);GO:0005768(endosome);GO:0035493(SNARE complex assembly);GO:0060627(regulation of vesicle-mediated transport)	-	-	4	122-141	N
miR156b	TGACAGAAGAGAGTGAGCAC	TRINITY_DN52910_c0_g6	PREDICTED: squamosa promoter-binding-like protein 12 [Juglans regia]	-	-	-	2	375-394	N
miR156b	TGACAGAAGAGAGTGAGCAC	TRINITY_DN54675_c1_g2	PREDICTED: squamosa promoter-binding-like protein 9 isoform X1 [Juglans regia]	GO:0003677(DNA binding);GO:0003700(transcription factor activity, sequence-specific DNA binding);GO:0005634(nucleus);GO:0005737(cytoplasm);GO:0006351(transcription, DNA-templated);GO:0006355(regulation of transcription, DNA-templated);GO:0010228(vegetative to reproductive phase transition of meristem);GO:0046872(metal ion binding);GO:0048366(leaf development);GO:0048653(anther development);GO:200…	-	SPL14	1	487-506	N
miR156b-3p	GCTTACTCTCTATCTGTCGTC	TRINITY_DN40340_c1_g3	-	-	-	-	4	54-73	N
miR156b-3p	GCTTACTCTCTATCTGTCGTC	TRINITY_DN49392_c0_g1	-	-	-	-	4	155-174	N
miR156b-3p	GCTTACTCTCTATCTGTCGTC	TRINITY_DN50235_c0_g3	PREDICTED: probable microtubule-binding protein TANGLED [Juglans regia]	GO:0000914(phragmoplast assembly);GO:0003674(molecular_function);GO:0005730(nucleolus);GO:0005739(mitochondrion);GO:0005875(microtubule associated complex);GO:0009524(phragmoplast);GO:0009574(preprophase band)	-	TAN	4	56-75	N
miR156c	TGACAGAAGAGAGTGAGCAC	TRINITY_DN37377_c2_g5	SBP-box transcription factor [Betula luminifera]	GO:0003677(DNA binding);GO:0003700(transcription factor activity, sequence-specific DNA binding);GO:0005634(nucleus);GO:0006351(transcription, DNA-templated);GO:0006355(regulation of transcription, DNA-templated);GO:0046872(metal ion binding);GO:0048653(anther development)	-	SPL13A	1	111-130	N
miR156c	TGACAGAAGAGAGTGAGCAC	TRINITY_DN37915_c0_g6	squamosa promoter binding-like protein [Betula platyphylla]	GO:0003677(DNA binding);GO:0003700(transcription factor activity, sequence-specific DNA binding);GO:0005634(nucleus);GO:0005737(cytoplasm);GO:0006351(transcription, DNA-templated);GO:0006355(regulation of transcription, DNA-templated);GO:0009908(flower development);GO:0010321(regulation of vegetative phase change);GO:0046872(metal ion binding)	ko04075(Plant hormone signal transduction)	SPL4	2	811-830	N
miR156c	TGACAGAAGAGAGTGAGCAC	TRINITY_DN40340_c1_g3	-	-	-	-	3	120-140	N
miR156c	TGACAGAAGAGAGTGAGCAC	TRINITY_DN43275_c0_g3	PREDICTED: putative ER lumen protein-retaining receptor C28H8.4 isoform X1 [Juglans regia]	GO:0004872(receptor activity);GO:0006621(protein retention in ER lumen);GO:0015031(protein transport);GO:0016021(integral component of membrane);GO:0046923(ER retention sequence binding)	-	KdelR	4	1655-1673	N
miR156c	TGACAGAAGAGAGTGAGCAC	TRINITY_DN44638_c0_g3	-	-	-	-	4	994-1012	N
miR156c	TGACAGAAGAGAGTGAGCAC	TRINITY_DN46822_c1_g2	PREDICTED: probable GABA transporter 2 [Juglans regia]	GO:0003333(amino acid transmembrane transport);GO:0015171(amino acid transmembrane transporter activity)	ko04075(Plant hormone signal transduction)	At5g41800	4	1457-1476	N
miR156c	TGACAGAAGAGAGTGAGCAC	TRINITY_DN49834_c0_g1	PREDICTED: UBP1-associated proteins 1C-like [Juglans regia]	GO:0003676(nucleic acid binding);GO:0005634(nucleus);GO:0008150(biological_process);GO:0008270(zinc ion binding)	-	UBA1C	4	10-28	N
miR156c	TGACAGAAGAGAGTGAGCAC	TRINITY_DN50148_c0_g7	FAD2 desaturase [Corylus avellana]	GO:0030176(integral component of endoplasmic reticulum membrane)	ko01212(Fatty acid metabolism);ko01040(Biosynthesis of unsaturated fatty acids)	FAD12	4	659-677	N
miR156c	TGACAGAAGAGAGTGAGCAC	TRINITY_DN52619_c1_g2	squamosa promoter binding protein-like 8 [Betula platyphylla]	GO:0003677(DNA binding);GO:0005634(nucleus);GO:0005737(cytoplasm);GO:0006351(transcription, DNA-templated);GO:0006355(regulation of transcription, DNA-templated);GO:0009554(megasporogenesis);GO:0009556(microsporogenesis);GO:0030154(cell differentiation);GO:0046872(metal ion binding);GO:0048653(anther development)	ko04075(Plant hormone signal transduction)	SPL8	2	984-1003	N
miR156c	TGACAGAAGAGAGTGAGCAC	TRINITY_DN52675_c0_g1	PREDICTED: uncharacterized protein LOC109021532 [Juglans regia]	GO:0000149(SNARE binding);GO:0000323(lytic vacuole);GO:0005768(endosome);GO:0035493(SNARE complex assembly);GO:0060627(regulation of vesicle-mediated transport)	-	-	4	122-141	N
miR156c	TGACAGAAGAGAGTGAGCAC	TRINITY_DN52910_c0_g6	PREDICTED: squamosa promoter-binding-like protein 12 [Juglans regia]	-	-	-	2	375-394	N
miR156c	TGACAGAAGAGAGTGAGCAC	TRINITY_DN54675_c1_g2	PREDICTED: squamosa promoter-binding-like protein 9 isoform X1 [Juglans regia]	GO:0003677(DNA binding);GO:0003700(transcription factor activity, sequence-specific DNA binding);GO:0005634(nucleus);GO:0005737(cytoplasm);GO:0006351(transcription, DNA-templated);GO:0006355(regulation of transcription, DNA-templated);GO:0010228(vegetative to reproductive phase transition of meristem);GO:0046872(metal ion binding);GO:0048366(leaf development);GO:0048653(anther development);GO:200…	-	SPL14	1	487-506	N
miR156d	TTGACAGAAGAGAGAGAGCAC	TRINITY_DN37451_c0_g5	PREDICTED: protein LIGHT-DEPENDENT SHORT HYPOCOTYLS 4-like [Juglans regia]	GO:0003677(DNA binding);GO:0005634(nucleus);GO:0005739(mitochondrion);GO:0006355(regulation of transcription, DNA-templated);GO:0009886(post-embryonic morphogenesis)	-	LSH4	4	452-472	N
miR156d	TTGACAGAAGAGAGAGAGCAC	TRINITY_DN37915_c0_g6	squamosa promoter binding-like protein [Betula platyphylla]	GO:0003677(DNA binding);GO:0003700(transcription factor activity, sequence-specific DNA binding);GO:0005634(nucleus);GO:0005737(cytoplasm);GO:0006351(transcription, DNA-templated);GO:0006355(regulation of transcription, DNA-templated);GO:0009908(flower development);GO:0010321(regulation of vegetative phase change);GO:0046872(metal ion binding)	ko04075(Plant hormone signal transduction)	SPL4	2	811-831	N
miR156d	TTGACAGAAGAGAGAGAGCAC	TRINITY_DN43275_c0_g3	PREDICTED: putative ER lumen protein-retaining receptor C28H8.4 isoform X1 [Juglans regia]	GO:0004872(receptor activity);GO:0006621(protein retention in ER lumen);GO:0015031(protein transport);GO:0016021(integral component of membrane);GO:0046923(ER retention sequence binding)	-	KdelR	4	1655-1674	N
miR156d	TTGACAGAAGAGAGAGAGCAC	TRINITY_DN44445_c1_g4	hypothetical protein PRUPE_ppa007058mg [Prunus persica]	GO:0003674(molecular_function);GO:0005576(extracellular region);GO:0008150(biological_process)	ko03013(RNA transport)	ICR4	4	241-262	N
miR156d	TTGACAGAAGAGAGAGAGCAC	TRINITY_DN46822_c1_g2	PREDICTED: probable GABA transporter 2 [Juglans regia]	GO:0003333(amino acid transmembrane transport);GO:0015171(amino acid transmembrane transporter activity)	ko04075(Plant hormone signal transduction)	At5g41800	4	1457-1477	N
miR156d	TTGACAGAAGAGAGAGAGCAC	TRINITY_DN49045_c0_g3	PREDICTED: teosinte glume architecture 1-like [Juglans regia]	GO:0003677(DNA binding);GO:0003700(transcription factor activity, sequence-specific DNA binding);GO:0005634(nucleus);GO:0006351(transcription, DNA-templated);GO:0006355(regulation of transcription, DNA-templated);GO:0046872(metal ion binding);GO:0048653(anther development)	-	SPL13A	1	1322-1342	N
miR156d	TTGACAGAAGAGAGAGAGCAC	TRINITY_DN49210_c1_g2	PREDICTED: squamosa promoter-binding-like protein 3 [Juglans regia]	GO:0003677(DNA binding);GO:0003700(transcription factor activity, sequence-specific DNA binding);GO:0005634(nucleus);GO:0005737(cytoplasm);GO:0006351(transcription, DNA-templated);GO:0006355(regulation of transcription, DNA-templated);GO:0009908(flower development);GO:0010321(regulation of vegetative phase change);GO:0046872(metal ion binding)	ko04075(Plant hormone signal transduction)	SPL4	4	580-600	N
miR156d	TTGACAGAAGAGAGAGAGCAC	TRINITY_DN49834_c0_g1	PREDICTED: UBP1-associated proteins 1C-like [Juglans regia]	GO:0003676(nucleic acid binding);GO:0005634(nucleus);GO:0008150(biological_process);GO:0008270(zinc ion binding)	-	UBA1C	4	10-29	N
miR156d	TTGACAGAAGAGAGAGAGCAC	TRINITY_DN52619_c1_g2	squamosa promoter binding protein-like 8 [Betula platyphylla]	GO:0003677(DNA binding);GO:0005634(nucleus);GO:0005737(cytoplasm);GO:0006351(transcription, DNA-templated);GO:0006355(regulation of transcription, DNA-templated);GO:0009554(megasporogenesis);GO:0009556(microsporogenesis);GO:0030154(cell differentiation);GO:0046872(metal ion binding);GO:0048653(anther development)	ko04075(Plant hormone signal transduction)	SPL8	1	984-1004	N
miR156d	TTGACAGAAGAGAGAGAGCAC	TRINITY_DN52675_c0_g1	PREDICTED: uncharacterized protein LOC109021532 [Juglans regia]	GO:0000149(SNARE binding);GO:0000323(lytic vacuole);GO:0005768(endosome);GO:0035493(SNARE complex assembly);GO:0060627(regulation of vesicle-mediated transport)	-	-	3	122-142	N
miR156d	TTGACAGAAGAGAGAGAGCAC	TRINITY_DN52910_c0_g6	PREDICTED: squamosa promoter-binding-like protein 12 [Juglans regia]	-	-	-	1	375-395	N
miR156d	TTGACAGAAGAGAGAGAGCAC	TRINITY_DN55414_c0_g4	PREDICTED: calmodulin-binding receptor-like cytoplasmic kinase 3 [Juglans regia]	GO:0004674(protein serine/threonine kinase activity);GO:0005524(ATP binding);GO:0005737(cytoplasm);GO:0005886(plasma membrane);GO:0006468(protein phosphorylation);GO:0016301(kinase activity);GO:0016310(phosphorylation)	ko04626(Plant-pkogen interaction)	CRCK3	3	232-252	N
miR156d	TTGACAGAAGAGAGAGAGCAC	TRINITY_DN56225_c0_g1	-	-	-	-	3	187-206	N
miR156d-3p	GCTTTCTCTTCTTCTGTCACC	TRINITY_DN12447_c0_g1	PREDICTED: ribonuclease P protein subunit p25-like protein [Pyrus x bretschneideri]	GO:0004190(aspartic-type endopeptidase activity);GO:0006508(proteolysis);GO:0030163(protein catabolic process)	ko03013(RNA transport);ko03008(Ribosome biogenesis in eukaryotes)	-	3	611-631	N
miR156d-3p	GCTTTCTCTTCTTCTGTCACC	TRINITY_DN2016_c0_g1	-	-	-	-	4	575-594	N
miR156d-3p	GCTTTCTCTTCTTCTGTCACC	TRINITY_DN35713_c1_g1	PREDICTED: protein NUCLEAR FUSION DEFECTIVE 4-like isoform X1 [Juglans regia]	GO:0003674(molecular_function);GO:0005634(nucleus);GO:0016021(integral component of membrane);GO:0080167(response to karrikin)	-	-	4	184-203	N
miR156d-3p	GCTTTCTCTTCTTCTGTCACC	TRINITY_DN35914_c0_g1	-	-	-	-	4	601-621	N
miR156d-3p	GCTTTCTCTTCTTCTGTCACC	TRINITY_DN37143_c0_g5	-	-	-	-	4	32-51	N
miR156d-3p	GCTTTCTCTTCTTCTGTCACC	TRINITY_DN37509_c0_g4	PREDICTED: uncharacterized protein C4F10.09c-like [Juglans regia]	GO:0005634(nucleus)	-	MAK21	3.5	372-391	N
miR156d-3p	GCTTTCTCTTCTTCTGTCACC	TRINITY_DN37891_c0_g3	40S ribosomal protein S8 [Klebsormidium flaccidum]	GO:0000462(maturation of SSU-rRNA from tricistronic rRNA transcript (SSU-rRNA, 5.8S rRNA, LSU-rRNA));GO:0003735(structural constituent of ribosome);GO:0022627(cytosolic small ribosomal subunit)	ko03010(Ribosome)	RPS8	4	49-69	N
miR156d-3p	GCTTTCTCTTCTTCTGTCACC	TRINITY_DN39794_c0_g1	PREDICTED: O-acyltransferase WSD1-like [Juglans regia]	GO:0004144(diacylglycerol O-acyltransferase activity);GO:0005886(plasma membrane);GO:0019432(triglyceride biosynthetic process);GO:0047196(long-chain-alcohol O-fatty-acyltransferase activity)	ko00073(Cutin, suberine and wax biosynthesis)	WSD1	4	640-659	N
miR156d-3p	GCTTTCTCTTCTTCTGTCACC	TRINITY_DN39899_c0_g3	PREDICTED: flap endonuclease 1 isoform X2 [Juglans regia]	GO:0003677(DNA binding);GO:0004518(nuclease activity);GO:0004519(endonuclease activity);GO:0004527(exonuclease activity);GO:0005634(nucleus);GO:0005654(nucleoplasm);GO:0005730(nucleolus);GO:0005739(mitochondrion);GO:0005829(cytosol);GO:0006260(DNA replication);GO:0006281(DNA repair);GO:0046872(metal ion binding);GO:0048256(flap endonuclease activity)	ko03030(DNA replication);ko03410(Base excision repair);ko03450(Non-homologous end-joining)	FEN1	3	485-506	N
miR156d-3p	GCTTTCTCTTCTTCTGTCACC	TRINITY_DN40821_c3_g1	PREDICTED: ubinuclein-1-like isoform X1 [Juglans regia]	GO:0005634(nucleus);GO:0009611(response to wounding)	-	-	4	134-154	N
miR156d-3p	GCTTTCTCTTCTTCTGTCACC	TRINITY_DN42062_c0_g4	predicted protein [Hordeum vulgare subsp. vulgare]	GO:0000166(nucleotide binding);GO:0003746(translation elongation factor activity);GO:0003924(GTPase activity);GO:0005525(GTP binding);GO:0005622(intracellular);GO:0005737(cytoplasm);GO:0006412(translation);GO:0006414(translational elongation)	ko03013(RNA transport)	-	3	928-947	N
miR156d-3p	GCTTTCTCTTCTTCTGTCACC	TRINITY_DN4208_c0_g1	ribosomal protein L18, component of cytosolic 80S ribosome and 60S large subunit [Chlamydomonas reinhardtii]	GO:0003723(RNA binding);GO:0003735(structural constituent of ribosome);GO:0006412(translation);GO:0022625(cytosolic large ribosomal subunit)	ko03010(Ribosome)	RPL18	4	423-443	N
miR156d-3p	GCTTTCTCTTCTTCTGTCACC	TRINITY_DN43738_c1_g3	PREDICTED: ankyrin repeat domain-containing protein 13C [Juglans regia]	GO:0003674(molecular_function);GO:0005634(nucleus);GO:0005886(plasma membrane);GO:0008150(biological_process)	-	ANKRD13B	2.5	620-640	N
miR156d-3p	GCTTTCTCTTCTTCTGTCACC	TRINITY_DN44037_c0_g4	PREDICTED: probable histone H2B.3 [Cicer arietinum]	GO:0000788(nuclear nucleosome);GO:0003677(DNA binding);GO:0006334(nucleosome assembly)	-	At2g28720	4	181-200	N
miR156d-3p	GCTTTCTCTTCTTCTGTCACC	TRINITY_DN44444_c0_g1	PREDICTED: UBP1-associated protein 2A-like [Juglans regia]	GO:0000166(nucleotide binding);GO:0003723(RNA binding);GO:0005634(nucleus);GO:0005730(nucleolus);GO:0005829(cytosol);GO:0006952(defense response);GO:0008219(cell death);GO:0009693(ethylene biosynthetic process);GO:0010150(leaf senescence)	ko03040(Spliceosome)	UBA2C	3	38-59	N
miR156d-3p	GCTTTCTCTTCTTCTGTCACC	TRINITY_DN44572_c1_g4	PREDICTED: proline-rich receptor-like protein kinase PERK10 [Juglans regia]	GO:0003674(molecular_function);GO:0005634(nucleus);GO:0008150(biological_process)	-	-	3	1121-1142	N
miR156d-3p	GCTTTCTCTTCTTCTGTCACC	TRINITY_DN44725_c0_g1	PREDICTED: uncharacterized protein LOC109011905 [Juglans regia]	GO:0003674(molecular_function);GO:0005575(cellular_component);GO:0008150(biological_process)	-	-	2.5	497-516	N
miR156d-3p	GCTTTCTCTTCTTCTGTCACC	TRINITY_DN45175_c0_g1	PREDICTED: protein NRT1/ PTR FAMILY 5.2-like isoform X1 [Juglans regia]	GO:0005215(transporter activity);GO:0005886(plasma membrane);GO:0006857(oligopeptide transport);GO:0009611(response to wounding);GO:0009737(response to abscisic acid);GO:0009751(response to salicylic acid);GO:0009753(response to jasmonic acid);GO:0016020(membrane);GO:0016021(integral component of membrane);GO:0042538(hyperosmotic salinity response);GO:0042742(defense response to bacterium);GO:004…	-	NPF5.2	4	1-21	N
miR156d-3p	GCTTTCTCTTCTTCTGTCACC	TRINITY_DN46126_c0_g4	hypothetical protein MANES_02G084300 [Manihot esculenta]	GO:0005634(nucleus);GO:0006351(transcription, DNA-templated);GO:0006355(regulation of transcription, DNA-templated);GO:0007623(circadian rhythm);GO:0009641(shade avoidance);GO:0009742(brassinosteroid mediated signaling pathway);GO:0032502(developmental process);GO:0040008(regulation of growth)	-	PAR2	3	434-453	N
miR156d-3p	GCTTTCTCTTCTTCTGTCACC	TRINITY_DN46271_c1_g7	PREDICTED: zinc finger protein CONSTANS-LIKE 2-like [Juglans regia]	GO:0005634(nucleus);GO:0009416(response to light stimulus);GO:0009909(regulation of flower development)	ko04712(Circadian rhythm - plant)	COL2	2	1908-1928	N
miR156d-3p	GCTTTCTCTTCTTCTGTCACC	TRINITY_DN47168_c0_g2	PREDICTED: probable nucleolar protein 5-2 [Sesamum indicum]	GO:0003677(DNA binding);GO:0005634(nucleus);GO:0005730(nucleolus);GO:0005829(cytosol);GO:0009506(plasmodesma)	ko03008(Ribosome biogenesis in eukaryotes)	NOP5-1	4	255-276	N
miR156d-3p	GCTTTCTCTTCTTCTGTCACC	TRINITY_DN47439_c0_g1	PREDICTED: uncharacterized protein LOC109012857 [Juglans regia]	-	-	-	4	510-530	N
miR156d-3p	GCTTTCTCTTCTTCTGTCACC	TRINITY_DN47776_c0_g2	PREDICTED: uncharacterized protein LOC103415859 [Malus domestica]	GO:0008150(biological_process)	-	-	4	372-392	N
miR156d-3p	GCTTTCTCTTCTTCTGTCACC	TRINITY_DN48994_c0_g13	PREDICTED: protein TIC 100 [Prunus mume]	GO:0005515(protein binding);GO:0005622(intracellular);GO:0005623(cell);GO:0005737(cytoplasm);GO:0005886(plasma membrane);GO:0008565(protein transporter activity);GO:0009507(chloroplast);GO:0009535(chloroplast thylakoid membrane);GO:0009536(plastid);GO:0009658(chloroplast organization);GO:0009706(chloroplast inner membrane);GO:0009793(embryo development ending in seed dormancy);GO:0009941(chloropl…	-	TIC100	4	931-951	N
miR156d-3p	GCTTTCTCTTCTTCTGTCACC	TRINITY_DN49308_c0_g3	RNA-binding CRS1 / YhbY domain protein [Theobroma cacao]	GO:0003723(RNA binding);GO:0008150(biological_process);GO:0009507(chloroplast)	-	-	3.5	335-354	N
miR156d-3p	GCTTTCTCTTCTTCTGTCACC	TRINITY_DN49780_c0_g1	PREDICTED: nuclear poly(A) polymerase 1-like [Juglans regia]	GO:0004652(polynucleotide adenylyltransferase activity);GO:0005634(nucleus);GO:0006378(mRNA polyadenylation)	ko03015(mRNA surveillance pkoway)	PAPS1	4	2168-2189	N
miR156d-3p	GCTTTCTCTTCTTCTGTCACC	TRINITY_DN50411_c0_g1	PREDICTED: transcription factor DIVARICATA-like [Juglans regia]	GO:0003677(DNA binding);GO:0003700(transcription factor activity, sequence-specific DNA binding);GO:0005634(nucleus);GO:0006351(transcription, DNA-templated);GO:0006355(regulation of transcription, DNA-templated);GO:0009651(response to salt stress);GO:0009733(response to auxin);GO:0009739(response to gibberellin);GO:0009751(response to salicylic acid);GO:0009753(response to jasmonic acid);GO:0046…	-	DIVARICATA	3	85-106	N
miR156d-3p	GCTTTCTCTTCTTCTGTCACC	TRINITY_DN50750_c4_g9	Lysine--tRNA ligase, cytoplasmic, partial [Anthurium amnicola]	GO:0003729(mRNA binding);GO:0004824(lysine-tRNA ligase activity);GO:0005524(ATP binding);GO:0005737(cytoplasm);GO:0006418(tRNA aminoacylation for protein translation);GO:0006430(lysyl-tRNA aminoacylation)	ko00970(Aminoacyl-tRNA biosynthesis)	cla4	4	163-183	N
miR156d-3p	GCTTTCTCTTCTTCTGTCACC	TRINITY_DN52715_c1_g1	PREDICTED: protein TPX2 [Juglans regia]	GO:0003674(molecular_function);GO:0005739(mitochondrion);GO:0005819(spindle);GO:0005874(microtubule);GO:0032147(activation of protein kinase activity);GO:0060236(regulation of mitotic spindle organization)	-	TPX2	3.5	2332-2352	N
miR156d-3p	GCTTTCTCTTCTTCTGTCACC	TRINITY_DN52748_c0_g4	-	-	-	-	4	283-302	N
miR156d-3p	GCTTTCTCTTCTTCTGTCACC	TRINITY_DN52782_c1_g2	PREDICTED: protein TIME FOR COFFEE-like isoform X2 [Juglans regia]	GO:0003674(molecular_function);GO:0005634(nucleus);GO:0005982(starch metabolic process);GO:0006979(response to oxidative stress);GO:0009414(response to water deprivation);GO:0009737(response to abscisic acid);GO:0032502(developmental process);GO:0042752(regulation of circadian rhythm);GO:0048511(rhythmic process)	-	TIC	3.5	292-312	N
miR156d-3p	GCTTTCTCTTCTTCTGTCACC	TRINITY_DN54273_c0_g1	PREDICTED: MLO-like protein 3 [Juglans regia]	GO:0005886(plasma membrane);GO:0006952(defense response)	-	MLO3	4	1586-1606	N
miR156d-3p	GCTTTCTCTTCTTCTGTCACC	TRINITY_DN54361_c0_g4	PREDICTED: probable mediator of RNA polymerase II transcription subunit 26b isoform X1 [Juglans regia]	GO:0006368(transcription elongation from RNA polymerase II promoter);GO:0070449(elongin complex)	-	MED26B	4	909-928	N
miR156d-3p	GCTTTCTCTTCTTCTGTCACC	TRINITY_DN55701_c0_g1	PREDICTED: elongation of fatty acids protein 3-like [Juglans regia]	GO:0005739(mitochondrion);GO:0009922(fatty acid elongase activity);GO:0016021(integral component of membrane);GO:0030497(fatty acid elongation);GO:0042761(very long-chain fatty acid biosynthetic process);GO:0071215(cellular response to abscisic acid stimulus)	ko00062(Fatty acid elongation)	HOS3	4	894-913	N
miR156d-3p	GCTTTCTCTTCTTCTGTCACC	TRINITY_DN57493_c1_g2	PREDICTED: uncharacterized protein LOC100795315 [Glycine max]	-	-	-	4	285-305	N
miR156d-3p	GCTTTCTCTTCTTCTGTCACC	TRINITY_DN58601_c0_g1	predicted protein [Hordeum vulgare subsp. vulgare]	GO:0003677(DNA binding);GO:0003746(translation elongation factor activity);GO:0004871(signal transducer activity);GO:0005634(nucleus);GO:0005730(nucleolus);GO:0005737(cytoplasm);GO:0005783(endoplasmic reticulum);GO:0005853(eukaryotic translation elongation factor 1 complex);GO:0006355(regulation of transcription, DNA-templated);GO:0006414(translational elongation);GO:0007165(signal transduction);…	-	-	4	335-354	N
miR156e	TTGACAGAAGATAGAGAGCAC	TRINITY_DN37915_c0_g6	squamosa promoter binding-like protein [Betula platyphylla]	GO:0003677(DNA binding);GO:0003700(transcription factor activity, sequence-specific DNA binding);GO:0005634(nucleus);GO:0005737(cytoplasm);GO:0006351(transcription, DNA-templated);GO:0006355(regulation of transcription, DNA-templated);GO:0009908(flower development);GO:0010321(regulation of vegetative phase change);GO:0046872(metal ion binding)	ko04075(Plant hormone signal transduction)	SPL4	4	811-831	N
miR156e	TTGACAGAAGATAGAGAGCAC	TRINITY_DN39114_c0_g3	PREDICTED: pentatricopeptide repeat-containing protein At5g67570, chloroplastic [Juglans regia]	GO:0009507(chloroplast);GO:0009793(embryo development ending in seed dormancy);GO:0010468(regulation of gene expression)	-	DG1	3.5	1069-1088	N
miR156e	TTGACAGAAGATAGAGAGCAC	TRINITY_DN44161_c1_g6	-	-	-	-	4	304-323	N
miR156e	TTGACAGAAGATAGAGAGCAC	TRINITY_DN44445_c1_g4	hypothetical protein PRUPE_ppa007058mg [Prunus persica]	GO:0003674(molecular_function);GO:0005576(extracellular region);GO:0008150(biological_process)	ko03013(RNA transport)	ICR4	4	243-262	N
miR156e	TTGACAGAAGATAGAGAGCAC	TRINITY_DN45562_c1_g9	-	-	-	-	3	208-229	N
miR156e	TTGACAGAAGATAGAGAGCAC	TRINITY_DN49045_c0_g3	PREDICTED: teosinte glume architecture 1-like [Juglans regia]	GO:0003677(DNA binding);GO:0003700(transcription factor activity, sequence-specific DNA binding);GO:0005634(nucleus);GO:0006351(transcription, DNA-templated);GO:0006355(regulation of transcription, DNA-templated);GO:0046872(metal ion binding);GO:0048653(anther development)	-	SPL13A	3	1322-1342	N
miR156e	TTGACAGAAGATAGAGAGCAC	TRINITY_DN52619_c1_g2	squamosa promoter binding protein-like 8 [Betula platyphylla]	GO:0003677(DNA binding);GO:0005634(nucleus);GO:0005737(cytoplasm);GO:0006351(transcription, DNA-templated);GO:0006355(regulation of transcription, DNA-templated);GO:0009554(megasporogenesis);GO:0009556(microsporogenesis);GO:0030154(cell differentiation);GO:0046872(metal ion binding);GO:0048653(anther development)	ko04075(Plant hormone signal transduction)	SPL8	3	984-1004	N
miR156e	TTGACAGAAGATAGAGAGCAC	TRINITY_DN52910_c0_g6	PREDICTED: squamosa promoter-binding-like protein 12 [Juglans regia]	-	-	-	3	375-395	N
miR156e-3p	GCTCTCTATGCTTCTGTCATC	TRINITY_DN36985_c0_g9	PREDICTED: uncharacterized protein LOC108991284 [Juglans regia]	GO:0003674(molecular_function);GO:0008150(biological_process)	-	-	4	438-458	N
miR156e-3p	GCTCTCTATGCTTCTGTCATC	TRINITY_DN37192_c0_g1	PREDICTED: uncharacterized protein LOC109009615 isoform X1 [Juglans regia]	GO:0005634(nucleus);GO:0008150(biological_process)	-	-	4	455-475	N
miR156e-3p	GCTCTCTATGCTTCTGTCATC	TRINITY_DN38831_c0_g4	PREDICTED: ubiquitin-activating enzyme E1 1-like isoform X1 [Juglans regia]	GO:0004839(ubiquitin activating enzyme activity);GO:0004842(ubiquitin-protein transferase activity);GO:0005634(nucleus);GO:0005829(cytosol);GO:0019941(modification-dependent protein catabolic process)	ko04120(Ubiquitin mediated proteolysis)	UBA1	4	951-970	N
miR156e-3p	GCTCTCTATGCTTCTGTCATC	TRINITY_DN39506_c0_g8	PREDICTED: CCR4-NOT transcription complex subunit 1-like isoform X1 [Juglans regia]	GO:0000288(nuclear-transcribed mRNA catabolic process, deadenylation-dependent decay);GO:0000932(cytoplasmic mRNA processing body);GO:0017148(negative regulation of translation);GO:0030015(CCR4-NOT core complex);GO:0032947(protein complex scaffold)	ko03018(RNA dkoadation)	Cnot1	3.5	2621-2640	N
miR156e-3p	GCTCTCTATGCTTCTGTCATC	TRINITY_DN42303_c1_g1	PREDICTED: uncharacterized protein LOC109008504 isoform X2 [Juglans regia]	GO:0004842(ubiquitin-protein transferase activity);GO:0005737(cytoplasm)	-	-	4	403-422	N
miR156e-3p	GCTCTCTATGCTTCTGTCATC	TRINITY_DN44143_c1_g1	PREDICTED: bax inhibitor 1-like [Juglans regia]	GO:0000038(very long-chain fatty acid metabolic process);GO:0005515(protein binding);GO:0005635(nuclear envelope);GO:0005737(cytoplasm);GO:0005783(endoplasmic reticulum);GO:0005789(endoplasmic reticulum membrane);GO:0005886(plasma membrane);GO:0006915(apoptotic process);GO:0006983(ER overload response);GO:0009414(response to water deprivation);GO:0016021(integral component of membrane);GO:0043069…	-	BI-1	4	487-506	N
miR156e-3p	GCTCTCTATGCTTCTGTCATC	TRINITY_DN45562_c1_g9	-	-	-	-	3	146-165	N
miR156e-3p	GCTCTCTATGCTTCTGTCATC	TRINITY_DN59681_c0_g1	-	GO:0003779(actin binding);GO:0005622(intracellular);GO:0005737(cytoplasm);GO:0005856(cytoskeleton);GO:0009617(response to bacterium);GO:0015629(actin cytoskeleton);GO:0030833(regulation of actin filament polymerization);GO:0044351(macropinocytosis);GO:0045335(phagocytic vesicle);GO:0051015(actin filament binding)	-	coaA	3.5	210-229	N
miR156f	TCTCTTTTCTTCTGTCAATAGA	TRINITY_DN14840_c0_g1	-	-	-	-	4	102-122	N
miR156f	TCTCTTTTCTTCTGTCAATAGA	TRINITY_DN40154_c0_g3	PREDICTED: uncharacterized protein LOC109002888 [Juglans regia]	GO:0003674(molecular_function);GO:0005739(mitochondrion);GO:0010082(regulation of root meristem growth);GO:0032875(regulation of DNA endoreduplication);GO:0051302(regulation of cell division)	-	-	4	796-817	N
miR156f	TCTCTTTTCTTCTGTCAATAGA	TRINITY_DN41733_c0_g4	PREDICTED: E3 ubiquitin ligase BIG BROTHER-related [Juglans regia]	GO:0043161(proteasome-mediated ubiquitin-dependent protein catabolic process);GO:0061630(ubiquitin protein ligase activity)	-	BBR	4	121-141	N
miR156f	TCTCTTTTCTTCTGTCAATAGA	TRINITY_DN44021_c1_g7	hypothetical protein M569_00483, partial [Genlisea aurea]	GO:0009536(plastid)	ko00195(Photosynthesis)	psbJ	3.5	45-66	N
miR156f	TCTCTTTTCTTCTGTCAATAGA	TRINITY_DN47606_c0_g1	PREDICTED: 40S ribosomal protein S27-2 [Solanum tuberosum]	GO:0000028(ribosomal small subunit assembly);GO:0003735(structural constituent of ribosome);GO:0006412(translation);GO:0022627(cytosolic small ribosomal subunit);GO:0046872(metal ion binding)	ko03010(Ribosome)	RPS27	3.5	105-125	N
miR156f	TCTCTTTTCTTCTGTCAATAGA	TRINITY_DN48909_c1_g2	PREDICTED: glutaredoxin-C9-like [Juglans regia]	GO:0005515(protein binding);GO:0005634(nucleus);GO:0005737(cytoplasm);GO:0009055(electron carrier activity);GO:0009751(response to salicylic acid);GO:0009863(salicylic acid mediated signaling pathway);GO:0009867(jasmonic acid mediated signaling pathway);GO:0015035(protein disulfide oxidoreductase activity);GO:0045454(cell redox homeostasis);GO:0055114(oxidation-reduction process)	-	GRXC9	2	614-634	N
miR156f	TCTCTTTTCTTCTGTCAATAGA	TRINITY_DN53419_c0_g4	-	-	-	-	4	439-461	N
miR156f	TCTCTTTTCTTCTGTCAATAGA	TRINITY_DN54068_c1_g2	PREDICTED: uncharacterized protein LOC109002331 [Juglans regia]	GO:0003674(molecular_function);GO:0005634(nucleus);GO:0008150(biological_process)	ko00900(Terpenoid backbone biosynthesis);ko00909(Sesquiterpenoid and triterpenoid biosynthesis)	-	4	453-473	N
miR156g	TGACAGAAGAGAGTGAGCACT	TRINITY_DN37377_c2_g5	SBP-box transcription factor [Betula luminifera]	GO:0003677(DNA binding);GO:0003700(transcription factor activity, sequence-specific DNA binding);GO:0005634(nucleus);GO:0006351(transcription, DNA-templated);GO:0006355(regulation of transcription, DNA-templated);GO:0046872(metal ion binding);GO:0048653(anther development)	-	SPL13A	2	110-130	N
miR156g	TGACAGAAGAGAGTGAGCACT	TRINITY_DN37915_c0_g6	squamosa promoter binding-like protein [Betula platyphylla]	GO:0003677(DNA binding);GO:0003700(transcription factor activity, sequence-specific DNA binding);GO:0005634(nucleus);GO:0005737(cytoplasm);GO:0006351(transcription, DNA-templated);GO:0006355(regulation of transcription, DNA-templated);GO:0009908(flower development);GO:0010321(regulation of vegetative phase change);GO:0046872(metal ion binding)	ko04075(Plant hormone signal transduction)	SPL4	3	810-830	N
miR156g	TGACAGAAGAGAGTGAGCACT	TRINITY_DN40340_c1_g3	-	-	-	-	4	119-140	N
miR156g	TGACAGAAGAGAGTGAGCACT	TRINITY_DN44638_c0_g3	-	-	-	-	4	993-1012	N
miR156g	TGACAGAAGAGAGTGAGCACT	TRINITY_DN50148_c0_g7	FAD2 desaturase [Corylus avellana]	GO:0030176(integral component of endoplasmic reticulum membrane)	ko01212(Fatty acid metabolism);ko01040(Biosynthesis of unsaturated fatty acids)	FAD12	4	658-677	N
miR156g	TGACAGAAGAGAGTGAGCACT	TRINITY_DN52619_c1_g2	squamosa promoter binding protein-like 8 [Betula platyphylla]	GO:0003677(DNA binding);GO:0005634(nucleus);GO:0005737(cytoplasm);GO:0006351(transcription, DNA-templated);GO:0006355(regulation of transcription, DNA-templated);GO:0009554(megasporogenesis);GO:0009556(microsporogenesis);GO:0030154(cell differentiation);GO:0046872(metal ion binding);GO:0048653(anther development)	ko04075(Plant hormone signal transduction)	SPL8	2	983-1003	N
miR156g	TGACAGAAGAGAGTGAGCACT	TRINITY_DN52675_c0_g1	PREDICTED: uncharacterized protein LOC109021532 [Juglans regia]	GO:0000149(SNARE binding);GO:0000323(lytic vacuole);GO:0005768(endosome);GO:0035493(SNARE complex assembly);GO:0060627(regulation of vesicle-mediated transport)	-	-	4	121-141	N
miR156g	TGACAGAAGAGAGTGAGCACT	TRINITY_DN52910_c0_g6	PREDICTED: squamosa promoter-binding-like protein 12 [Juglans regia]	-	-	-	3	374-394	N
miR156g	TGACAGAAGAGAGTGAGCACT	TRINITY_DN54675_c1_g2	PREDICTED: squamosa promoter-binding-like protein 9 isoform X1 [Juglans regia]	GO:0003677(DNA binding);GO:0003700(transcription factor activity, sequence-specific DNA binding);GO:0005634(nucleus);GO:0005737(cytoplasm);GO:0006351(transcription, DNA-templated);GO:0006355(regulation of transcription, DNA-templated);GO:0010228(vegetative to reproductive phase transition of meristem);GO:0046872(metal ion binding);GO:0048366(leaf development);GO:0048653(anther development);GO:200…	-	SPL14	2	486-506	N
miR156h	TGACAGAAGAGAGTGAGCACT	TRINITY_DN37377_c2_g5	SBP-box transcription factor [Betula luminifera]	GO:0003677(DNA binding);GO:0003700(transcription factor activity, sequence-specific DNA binding);GO:0005634(nucleus);GO:0006351(transcription, DNA-templated);GO:0006355(regulation of transcription, DNA-templated);GO:0046872(metal ion binding);GO:0048653(anther development)	-	SPL13A	2	110-130	N
miR156h	TGACAGAAGAGAGTGAGCACT	TRINITY_DN37915_c0_g6	squamosa promoter binding-like protein [Betula platyphylla]	GO:0003677(DNA binding);GO:0003700(transcription factor activity, sequence-specific DNA binding);GO:0005634(nucleus);GO:0005737(cytoplasm);GO:0006351(transcription, DNA-templated);GO:0006355(regulation of transcription, DNA-templated);GO:0009908(flower development);GO:0010321(regulation of vegetative phase change);GO:0046872(metal ion binding)	ko04075(Plant hormone signal transduction)	SPL4	3	810-830	N
miR156h	TGACAGAAGAGAGTGAGCACT	TRINITY_DN40340_c1_g3	-	-	-	-	4	119-140	N
miR156h	TGACAGAAGAGAGTGAGCACT	TRINITY_DN44638_c0_g3	-	-	-	-	4	993-1012	N
miR156h	TGACAGAAGAGAGTGAGCACT	TRINITY_DN50148_c0_g7	FAD2 desaturase [Corylus avellana]	GO:0030176(integral component of endoplasmic reticulum membrane)	ko01212(Fatty acid metabolism);ko01040(Biosynthesis of unsaturated fatty acids)	FAD12	4	658-677	N
miR156h	TGACAGAAGAGAGTGAGCACT	TRINITY_DN52619_c1_g2	squamosa promoter binding protein-like 8 [Betula platyphylla]	GO:0003677(DNA binding);GO:0005634(nucleus);GO:0005737(cytoplasm);GO:0006351(transcription, DNA-templated);GO:0006355(regulation of transcription, DNA-templated);GO:0009554(megasporogenesis);GO:0009556(microsporogenesis);GO:0030154(cell differentiation);GO:0046872(metal ion binding);GO:0048653(anther development)	ko04075(Plant hormone signal transduction)	SPL8	2	983-1003	N
miR156h	TGACAGAAGAGAGTGAGCACT	TRINITY_DN52675_c0_g1	PREDICTED: uncharacterized protein LOC109021532 [Juglans regia]	GO:0000149(SNARE binding);GO:0000323(lytic vacuole);GO:0005768(endosome);GO:0035493(SNARE complex assembly);GO:0060627(regulation of vesicle-mediated transport)	-	-	4	121-141	N
miR156h	TGACAGAAGAGAGTGAGCACT	TRINITY_DN52910_c0_g6	PREDICTED: squamosa promoter-binding-like protein 12 [Juglans regia]	-	-	-	3	374-394	N
miR156h	TGACAGAAGAGAGTGAGCACT	TRINITY_DN54675_c1_g2	PREDICTED: squamosa promoter-binding-like protein 9 isoform X1 [Juglans regia]	GO:0003677(DNA binding);GO:0003700(transcription factor activity, sequence-specific DNA binding);GO:0005634(nucleus);GO:0005737(cytoplasm);GO:0006351(transcription, DNA-templated);GO:0006355(regulation of transcription, DNA-templated);GO:0010228(vegetative to reproductive phase transition of meristem);GO:0046872(metal ion binding);GO:0048366(leaf development);GO:0048653(anther development);GO:200…	-	SPL14	2	486-506	N
miR156i	TGACAGAAGAGAGTGAGCACC	TRINITY_DN37377_c2_g5	SBP-box transcription factor [Betula luminifera]	GO:0003677(DNA binding);GO:0003700(transcription factor activity, sequence-specific DNA binding);GO:0005634(nucleus);GO:0006351(transcription, DNA-templated);GO:0006355(regulation of transcription, DNA-templated);GO:0046872(metal ion binding);GO:0048653(anther development)	-	SPL13A	2	110-130	N
miR156i	TGACAGAAGAGAGTGAGCACC	TRINITY_DN37915_c0_g6	squamosa promoter binding-like protein [Betula platyphylla]	GO:0003677(DNA binding);GO:0003700(transcription factor activity, sequence-specific DNA binding);GO:0005634(nucleus);GO:0005737(cytoplasm);GO:0006351(transcription, DNA-templated);GO:0006355(regulation of transcription, DNA-templated);GO:0009908(flower development);GO:0010321(regulation of vegetative phase change);GO:0046872(metal ion binding)	ko04075(Plant hormone signal transduction)	SPL4	3	810-830	N
miR156i	TGACAGAAGAGAGTGAGCACC	TRINITY_DN40340_c1_g3	-	-	-	-	4	119-140	N
miR156i	TGACAGAAGAGAGTGAGCACC	TRINITY_DN49834_c0_g1	PREDICTED: UBP1-associated proteins 1C-like [Juglans regia]	GO:0003676(nucleic acid binding);GO:0005634(nucleus);GO:0008150(biological_process);GO:0008270(zinc ion binding)	-	UBA1C	4	9-28	N
miR156i	TGACAGAAGAGAGTGAGCACC	TRINITY_DN52619_c1_g2	squamosa promoter binding protein-like 8 [Betula platyphylla]	GO:0003677(DNA binding);GO:0005634(nucleus);GO:0005737(cytoplasm);GO:0006351(transcription, DNA-templated);GO:0006355(regulation of transcription, DNA-templated);GO:0009554(megasporogenesis);GO:0009556(microsporogenesis);GO:0030154(cell differentiation);GO:0046872(metal ion binding);GO:0048653(anther development)	ko04075(Plant hormone signal transduction)	SPL8	3	983-1003	N
miR156i	TGACAGAAGAGAGTGAGCACC	TRINITY_DN52910_c0_g6	PREDICTED: squamosa promoter-binding-like protein 12 [Juglans regia]	-	-	-	3	374-394	N
miR156i	TGACAGAAGAGAGTGAGCACC	TRINITY_DN54675_c1_g2	PREDICTED: squamosa promoter-binding-like protein 9 isoform X1 [Juglans regia]	GO:0003677(DNA binding);GO:0003700(transcription factor activity, sequence-specific DNA binding);GO:0005634(nucleus);GO:0005737(cytoplasm);GO:0006351(transcription, DNA-templated);GO:0006355(regulation of transcription, DNA-templated);GO:0010228(vegetative to reproductive phase transition of meristem);GO:0046872(metal ion binding);GO:0048366(leaf development);GO:0048653(anther development);GO:200…	-	SPL14	2	486-506	N
miR156j	TTGACAGAAGATAGAGAGCAC	TRINITY_DN37915_c0_g6	squamosa promoter binding-like protein [Betula platyphylla]	GO:0003677(DNA binding);GO:0003700(transcription factor activity, sequence-specific DNA binding);GO:0005634(nucleus);GO:0005737(cytoplasm);GO:0006351(transcription, DNA-templated);GO:0006355(regulation of transcription, DNA-templated);GO:0009908(flower development);GO:0010321(regulation of vegetative phase change);GO:0046872(metal ion binding)	ko04075(Plant hormone signal transduction)	SPL4	4	811-831	N
miR156j	TTGACAGAAGATAGAGAGCAC	TRINITY_DN39114_c0_g3	PREDICTED: pentatricopeptide repeat-containing protein At5g67570, chloroplastic [Juglans regia]	GO:0009507(chloroplast);GO:0009793(embryo development ending in seed dormancy);GO:0010468(regulation of gene expression)	-	DG1	3.5	1069-1088	N
miR156j	TTGACAGAAGATAGAGAGCAC	TRINITY_DN44161_c1_g6	-	-	-	-	4	304-323	N
miR156j	TTGACAGAAGATAGAGAGCAC	TRINITY_DN44445_c1_g4	hypothetical protein PRUPE_ppa007058mg [Prunus persica]	GO:0003674(molecular_function);GO:0005576(extracellular region);GO:0008150(biological_process)	ko03013(RNA transport)	ICR4	4	243-262	N
miR156j	TTGACAGAAGATAGAGAGCAC	TRINITY_DN45562_c1_g9	-	-	-	-	3	208-229	N
miR156j	TTGACAGAAGATAGAGAGCAC	TRINITY_DN49045_c0_g3	PREDICTED: teosinte glume architecture 1-like [Juglans regia]	GO:0003677(DNA binding);GO:0003700(transcription factor activity, sequence-specific DNA binding);GO:0005634(nucleus);GO:0006351(transcription, DNA-templated);GO:0006355(regulation of transcription, DNA-templated);GO:0046872(metal ion binding);GO:0048653(anther development)	-	SPL13A	3	1322-1342	N
miR156j	TTGACAGAAGATAGAGAGCAC	TRINITY_DN52619_c1_g2	squamosa promoter binding protein-like 8 [Betula platyphylla]	GO:0003677(DNA binding);GO:0005634(nucleus);GO:0005737(cytoplasm);GO:0006351(transcription, DNA-templated);GO:0006355(regulation of transcription, DNA-templated);GO:0009554(megasporogenesis);GO:0009556(microsporogenesis);GO:0030154(cell differentiation);GO:0046872(metal ion binding);GO:0048653(anther development)	ko04075(Plant hormone signal transduction)	SPL8	3	984-1004	N
miR156j	TTGACAGAAGATAGAGAGCAC	TRINITY_DN52910_c0_g6	PREDICTED: squamosa promoter-binding-like protein 12 [Juglans regia]	-	-	-	3	375-395	N
miR158a-3p	TCCCAAATGTAGACAAAGCA	TRINITY_DN44510_c0_g4	-	-	-	-	4	339-357	N
miR158a-3p	TCCCAAATGTAGACAAAGCA	TRINITY_DN46921_c0_g2	PREDICTED: DDT domain-containing protein PTM-like [Juglans regia]	GO:0003677(DNA binding);GO:0005634(nucleus);GO:0006355(regulation of transcription, DNA-templated);GO:0008270(zinc ion binding)	-	PTM	3.5	4195-4214	N
miR159a	TTTGGATTGAAGGGAGCTTA	TRINITY_DN37004_c2_g1	-	-	-	-	4	102-121	N
miR159a	TTTGGATTGAAGGGAGCTTA	TRINITY_DN38107_c1_g7	Heat shock cognate 70 kDa protein, partial [Noccaea caerulescens]	GO:0000166(nucleotide binding);GO:0005515(protein binding);GO:0005524(ATP binding);GO:0005634(nucleus);GO:0005737(cytoplasm);GO:0005829(cytosol);GO:0008340(determination of adult lifespan);GO:0009408(response to heat);GO:0016887(ATPase activity);GO:0042147(retrograde transport, endosome to Golgi)	ko03040(Spliceosome);ko04141(Protein processing in endoplasmic reticulum);ko04144(Endocytosis)	-	4	1072-1091	N
miR159a	TTTGGATTGAAGGGAGCTTA	TRINITY_DN39614_c0_g4	PREDICTED: uncharacterized protein At4g15545 isoform X1 [Juglans regia]	GO:0005886(plasma membrane);GO:0006810(transport);GO:0022857(transmembrane transporter activity)	-	At4g15545	4	248-267	N
miR159a	TTTGGATTGAAGGGAGCTTA	TRINITY_DN39993_c0_g1	hypothetical protein PRUPE_ppa004847mg [Prunus persica]	GO:0004672(protein kinase activity);GO:0005524(ATP binding);GO:0005886(plasma membrane);GO:0006468(protein phosphorylation);GO:0009742(brassinosteroid mediated signaling pathway);GO:0016301(kinase activity)	ko04075(Plant hormone signal transduction)	At4g35230	4	136-155	N
miR159a	TTTGGATTGAAGGGAGCTTA	TRINITY_DN41840_c1_g6	PREDICTED: uncharacterized protein LOC108987817 isoform X3 [Juglans regia]	GO:0004519(endonuclease activity);GO:0005739(mitochondrion);GO:0005777(peroxisome);GO:0009507(chloroplast);GO:0010468(regulation of gene expression)	-	-	3.5	3440-3460	N
miR159a	TTTGGATTGAAGGGAGCTTA	TRINITY_DN45504_c0_g5	PREDICTED: UDP-galactose/UDP-glucose transporter 2-like [Fragaria vesca subsp. vesca]	GO:0030173(integral component of Golgi membrane);GO:0030176(integral component of endoplasmic reticulum membrane);GO:0046964(3'-phosphoadenosine 5'-phosphosulfate transmembrane transporter activity)	-	UTR2	4	1544-1562	N
miR159a	TTTGGATTGAAGGGAGCTTA	TRINITY_DN47375_c1_g4	PREDICTED: probable sugar phosphate/phosphate translocator At3g14410 [Juglans regia]	GO:0005886(plasma membrane);GO:0008514(organic anion transmembrane transporter activity);GO:0008643(carbohydrate transport);GO:0016021(integral component of membrane);GO:0022626(cytosolic ribosome)	-	At3g14410	4	133-153	N
miR159a	TTTGGATTGAAGGGAGCTTA	TRINITY_DN48837_c0_g2	uncharacterized LOC103454749 [Malus domestica]	GO:0003676(nucleic acid binding);GO:0005737(cytoplasm);GO:0006364(rRNA processing);GO:0016740(transferase activity)	-	BBta_4721	4	798-817	N
miR159a	TTTGGATTGAAGGGAGCTTA	TRINITY_DN48946_c0_g2	PREDICTED: probable apyrase 6 [Juglans regia]	GO:0005524(ATP binding);GO:0009901(anther dehiscence);GO:0010584(pollen exine formation);GO:0016021(integral component of membrane);GO:0016787(hydrolase activity);GO:0030659(cytoplasmic vesicle membrane)	ko00230(Purine metabolism);ko00240(Pyrimidine metabolism)	APY6	4	149-169	N
miR159a	TTTGGATTGAAGGGAGCTTA	TRINITY_DN54826_c0_g9	PREDICTED: chitinase domain-containing protein 1 [Juglans regia]	GO:0004568(chitinase activity);GO:0005576(extracellular region);GO:0006032(chitin catabolic process);GO:0008061(chitin binding)	-	chid1	3.5	881-901	N
miR159a	TTTGGATTGAAGGGAGCTTA	TRINITY_DN55342_c0_g10	PREDICTED: uncharacterized protein LOC105349370 isoform X1 [Fragaria vesca subsp. vesca]	GO:0004842(ubiquitin-protein transferase activity);GO:0005576(extracellular region);GO:0005886(plasma membrane);GO:0008270(zinc ion binding)	-	sll0103	4	1070-1088	N
miR159c-5p	GAGCTCCTTGAAGTCCAATGG	TRINITY_DN36848_c0_g6	40S ribosomal protein S19-B, partial [Anthurium amnicola]	GO:0043581(mycelium development)	ko03010(Ribosome)	rps19	3.5	168-187	N
miR159c-5p	GAGCTCCTTGAAGTCCAATGG	TRINITY_DN38988_c0_g4	PREDICTED: uncharacterized protein At4g22758-like [Juglans regia]	GO:0003674(molecular_function);GO:0008150(biological_process)	-	-	4	738-758	N
miR164a	TGGAGAAGCAGGGCACGTGCA	TRINITY_DN52416_c0_g2	PREDICTED: serine/threonine-protein kinase RIO1-like isoform X2 [Nelumbo nucifera]	GO:0004674(protein serine/threonine kinase activity);GO:0005524(ATP binding);GO:0005737(cytoplasm)	ko03008(Ribosome biogenesis in eukaryotes)	RIOK1	4	434-455	N
miR164a	TGGAGAAGCAGGGCACGTGCA	TRINITY_DN55133_c1_g1	PREDICTED: UDP-glucuronic acid decarboxylase 6 [Juglans regia]	GO:0003824(catalytic activity);GO:0005829(cytosol);GO:0005886(plasma membrane);GO:0009225(nucleotide-sugar metabolic process);GO:0033320(UDP-D-xylose biosynthetic process);GO:0042732(D-xylose metabolic process);GO:0048040(UDP-glucuronate decarboxylase activity)	ko00500(Starch and sucrose metabolism);ko00520(Amino sugar and nucleotide sugar metabolism)	UXS5	4	544-564	N
miR164a	TGGAGAAGCAGGGCACGTGCA	TRINITY_DN55751_c0_g4	NAC domain-containing protein 1 [Betula luminifera]	GO:0003677(DNA binding);GO:0003700(transcription factor activity, sequence-specific DNA binding);GO:0005634(nucleus);GO:0006351(transcription, DNA-templated);GO:0006355(regulation of transcription, DNA-templated);GO:0007275(multicellular organism development)	ko03018(RNA dkoadation)	NAC100	2.5	871-891	N
miR164a-3p	CACGTGCTCCCCTTCTCCAAC	TRINITY_DN46064_c0_g2	PREDICTED: phosphatidate phosphatase PAH1 [Juglans regia]	GO:0008195(phosphatidate phosphatase activity)	ko00561(Glycerolipid metabolism);ko00564(Glycerophospholipid metabolism)	PAH1	4	888-908	N
miR166a	TCGGACCAGGCTTCATTCCCC	TRINITY_DN41167_c0_g3	PREDICTED: homeobox-leucine zipper protein ATHB-15 [Vitis vinifera]	GO:0003677(DNA binding);GO:0003700(transcription factor activity, sequence-specific DNA binding);GO:0005634(nucleus);GO:0006351(transcription, DNA-templated);GO:0006355(regulation of transcription, DNA-templated);GO:0008289(lipid binding);GO:0009855(determination of bilateral symmetry);GO:0009887(organ morphogenesis);GO:0009965(leaf morphogenesis);GO:0010014(meristem initiation);GO:0010073(merist…	-	ATHB-15	2.5	1585-1605	N
miR166b	GCGGACCAGGCTTCATTCCCC	TRINITY_DN41167_c0_g3	PREDICTED: homeobox-leucine zipper protein ATHB-15 [Vitis vinifera]	GO:0003677(DNA binding);GO:0003700(transcription factor activity, sequence-specific DNA binding);GO:0005634(nucleus);GO:0006351(transcription, DNA-templated);GO:0006355(regulation of transcription, DNA-templated);GO:0008289(lipid binding);GO:0009855(determination of bilateral symmetry);GO:0009887(organ morphogenesis);GO:0009965(leaf morphogenesis);GO:0010014(meristem initiation);GO:0010073(merist…	-	ATHB-15	3	1585-1605	N
miR166b	GCGGACCAGGCTTCATTCCCC	TRINITY_DN41421_c2_g1	PREDICTED: histone deacetylase 6 [Malus domestica]	GO:0000118(histone deacetylase complex);GO:0000209(protein polyubiquitination);GO:0001047(core promoter binding);GO:0001932(regulation of protein phosphorylation);GO:0001975(response to amphetamine);GO:0004407(histone deacetylase activity);GO:0005515(protein binding);GO:0005634(nucleus);GO:0005737(cytoplasm);GO:0005813(centrosome);GO:0005829(cytosol);GO:0005874(microtubule);GO:0005875(microtubule…	ko00760(Nicotinate and nicotinamide metabolism)	Hdac6	4	7-26	N
miR166b-5p	GGAATGTTGTCTGGCTCG	TRINITY_DN35689_c2_g1	-	-	-	-	4	187-204	N
miR166b-5p	GGAATGTTGTCTGGCTCG	TRINITY_DN35852_c3_g5	Casein kinase I hhp1 [Anthurium amnicola]	GO:0004674(protein serine/threonine kinase activity);GO:0005634(nucleus);GO:0005737(cytoplasm);GO:0006897(endocytosis);GO:0008360(regulation of cell shape);GO:0016055(Wnt signaling pathway);GO:0018105(peptidyl-serine phosphorylation)	ko03008(Ribosome biogenesis in eukaryotes)	hhp1	4	588-604	N
miR166b-5p	GGAATGTTGTCTGGCTCG	TRINITY_DN38164_c0_g1	PREDICTED: histone H2B [Oryza brachyantha]	GO:0000788(nuclear nucleosome);GO:0003677(DNA binding);GO:0006334(nucleosome assembly)	-	AGAP012199	4	30-47	N
miR166b-5p	GGAATGTTGTCTGGCTCG	TRINITY_DN38338_c0_g1	PREDICTED: uncharacterized protein ycf36 isoform X1 [Juglans regia]	GO:0003674(molecular_function);GO:0008150(biological_process);GO:0009507(chloroplast);GO:0016021(integral component of membrane)	-	ycf36	3.5	754-770	N
miR166b-5p	GGAATGTTGTCTGGCTCG	TRINITY_DN38706_c1_g6	PREDICTED: ankyrin repeat-containing protein At5g02620-like [Juglans regia]	GO:0008150(biological_process);GO:0016021(integral component of membrane)	-	At5g02620	4	195-212	N
miR166b-5p	GGAATGTTGTCTGGCTCG	TRINITY_DN38876_c0_g16	PREDICTED: HVA22-like protein a [Juglans regia]	GO:0003674(molecular_function);GO:0005634(nucleus);GO:0009409(response to cold);GO:0009414(response to water deprivation);GO:0009737(response to abscisic acid);GO:0016021(integral component of membrane);GO:0042538(hyperosmotic salinity response)	-	HVA22A	4	504-521	N
miR166b-5p	GGAATGTTGTCTGGCTCG	TRINITY_DN40706_c1_g4	PREDICTED: uncharacterized protein LOC109013033 [Juglans regia]	GO:0000045(autophagosome assembly);GO:0000421(autophagosome membrane)	-	-	4	634-650	N
miR166b-5p	GGAATGTTGTCTGGCTCG	TRINITY_DN42202_c0_g1	PREDICTED: transcription factor bHLH143-like [Juglans regia]	GO:0001046(core promoter sequence-specific DNA binding);GO:0001228(transcriptional activator activity, RNA polymerase II transcription regulatory region sequence-specific binding);GO:0005634(nucleus);GO:0006366(transcription from RNA polymerase II promoter)	-	BHLH145	3	1162-1179	N
miR166b-5p	GGAATGTTGTCTGGCTCG	TRINITY_DN44250_c1_g2	PREDICTED: oxysterol-binding protein-related protein 1D-like [Juglans regia]	GO:0005634(nucleus);GO:0006869(lipid transport);GO:0007165(signal transduction);GO:0008142(oxysterol binding);GO:0008202(steroid metabolic process);GO:0008289(lipid binding);GO:0035091(phosphatidylinositol binding)	ko00500(Starch and sucrose metabolism);ko00520(Amino sugar and nucleotide sugar metabolism)	ORP1D	4	821-838	N
miR166b-5p	GGAATGTTGTCTGGCTCG	TRINITY_DN44424_c0_g5	PREDICTED: uncharacterized protein LOC108993487 [Juglans regia]	GO:0003677(DNA binding);GO:0005634(nucleus);GO:0006355(regulation of transcription, DNA-templated);GO:0008270(zinc ion binding)	-	SPCC126.07c	4	1076-1092	N
miR166b-5p	GGAATGTTGTCTGGCTCG	TRINITY_DN44850_c0_g2	PREDICTED: DEAD-box ATP-dependent RNA helicase 50 isoform X1 [Juglans regia]	GO:0004004(ATP-dependent RNA helicase activity);GO:0010501(RNA secondary structure unwinding)	ko03040(Spliceosome)	RH50	3.5	1352-1369	N
miR166b-5p	GGAATGTTGTCTGGCTCG	TRINITY_DN47011_c0_g2	PREDICTED: exocyst complex component EXO70B1-like [Juglans regia]	GO:0000145(exocyst);GO:0005829(cytosol);GO:0006887(exocytosis);GO:0006904(vesicle docking involved in exocytosis)	-	EXO70A1	3.5	79-97	N
miR166b-5p	GGAATGTTGTCTGGCTCG	TRINITY_DN47726_c0_g7	PREDICTED: uncharacterized protein LOC108982412 isoform X1 [Juglans regia]	GO:0003674(molecular_function);GO:0005634(nucleus);GO:0008150(biological_process)	-	-	4	239-256	N
miR166b-5p	GGAATGTTGTCTGGCTCG	TRINITY_DN49337_c0_g9	-	-	-	-	4	172-189	N
miR166b-5p	GGAATGTTGTCTGGCTCG	TRINITY_DN50444_c0_g3	PREDICTED: probable polyamine transporter At1g31830 isoform X1 [Juglans regia]	GO:0005887(integral component of plasma membrane);GO:0015179(L-amino acid transmembrane transporter activity);GO:0015203(polyamine transmembrane transporter activity);GO:0015297(antiporter activity)	ko03015(mRNA surveillance pkoway)	At1g31830	3.5	846-864	N
miR166b-5p	GGAATGTTGTCTGGCTCG	TRINITY_DN51632_c0_g6	hypothetical protein VITISV_042324 [Vitis vinifera]	GO:0004832(valine-tRNA ligase activity);GO:0005829(cytosol);GO:0006438(valyl-tRNA aminoacylation)	ko00040(Pentose and glucuronate interconversions);ko00052(Galactose metabolism);ko00053(Ascorbate and aldarate metabolism);ko00520(Amino sugar and nucleotide sugar metabolism)	GIP	4	2628-2646	N
miR166b-5p	GGAATGTTGTCTGGCTCG	TRINITY_DN51927_c0_g1	PREDICTED: elongator complex protein 4 isoform X1 [Juglans regia]	GO:0005634(nucleus);GO:0005737(cytoplasm);GO:0006351(transcription, DNA-templated);GO:0006355(regulation of transcription, DNA-templated);GO:0006357(regulation of transcription from RNA polymerase II promoter);GO:0008023(transcription elongation factor complex);GO:0008607(phosphorylase kinase regulator activity);GO:0033588(Elongator holoenzyme complex)	-	ELP4	4	1172-1188	N
miR166b-5p	GGAATGTTGTCTGGCTCG	TRINITY_DN52553_c0_g3	PREDICTED: 39S ribosomal protein L46, mitochondrial-like [Populus euphratica]	GO:0003735(structural constituent of ribosome);GO:0005762(mitochondrial large ribosomal subunit)	-	-	4	896-913	N
miR166b-5p	GGAATGTTGTCTGGCTCG	TRINITY_DN52667_c0_g4	PREDICTED: uncharacterized protein LOC109007496 [Juglans regia]	GO:0004672(protein kinase activity);GO:0004674(protein serine/threonine kinase activity);GO:0004713(protein tyrosine kinase activity);GO:0005524(ATP binding);GO:0005737(cytoplasm);GO:0005829(cytosol);GO:0006468(protein phosphorylation);GO:0009506(plasmodesma);GO:0009737(response to abscisic acid);GO:0016301(kinase activity);GO:0046777(protein autophosphorylation)	ko04075(Plant hormone signal transduction)	ppk15	4	1275-1293	N
miR166b-5p	GGAATGTTGTCTGGCTCG	TRINITY_DN55217_c0_g1	PREDICTED: putative HVA22-like protein g [Juglans regia]	GO:0003674(molecular_function);GO:0008150(biological_process)	-	HVA22J	4	918-935	N
miR166b-5p	GGAATGTTGTCTGGCTCG	TRINITY_DN56266_c0_g6	hypothetical protein CICLE_v10012740mg [Citrus clementina]	GO:0003674(molecular_function);GO:0005739(mitochondrion);GO:0008150(biological_process)	-	-	4	791-808	N
miR166b-5p	GGAATGTTGTCTGGCTCG	TRINITY_DN56712_c1_g3	-	-	-	-	4	11-28	N
miR166b-5p	GGAATGTTGTCTGGCTCG	TRINITY_DN9460_c0_g1	-	-	-	-	2.5	143-159	N
miR166c	TTCGGACCAGGCTTCATTCCCC	TRINITY_DN41167_c0_g3	PREDICTED: homeobox-leucine zipper protein ATHB-15 [Vitis vinifera]	GO:0003677(DNA binding);GO:0003700(transcription factor activity, sequence-specific DNA binding);GO:0005634(nucleus);GO:0006351(transcription, DNA-templated);GO:0006355(regulation of transcription, DNA-templated);GO:0008289(lipid binding);GO:0009855(determination of bilateral symmetry);GO:0009887(organ morphogenesis);GO:0009965(leaf morphogenesis);GO:0010014(meristem initiation);GO:0010073(merist…	-	ATHB-15	3	1585-1606	N
miR166c-5p	GGAATGTCGTCTGGTTCGAGA	TRINITY_DN56352_c0_g1	PREDICTED: uncharacterized protein LOC109013535 [Juglans regia]	GO:0004674(protein serine/threonine kinase activity);GO:0005886(plasma membrane);GO:0006468(protein phosphorylation);GO:0006952(defense response);GO:0009506(plasmodesma)	ko00520(Amino sugar and nucleotide sugar metabolism)	At4g27290	4	825-844	N
miR166d	TTCGGACCAGGCTTCATTCCCC	TRINITY_DN41167_c0_g3	PREDICTED: homeobox-leucine zipper protein ATHB-15 [Vitis vinifera]	GO:0003677(DNA binding);GO:0003700(transcription factor activity, sequence-specific DNA binding);GO:0005634(nucleus);GO:0006351(transcription, DNA-templated);GO:0006355(regulation of transcription, DNA-templated);GO:0008289(lipid binding);GO:0009855(determination of bilateral symmetry);GO:0009887(organ morphogenesis);GO:0009965(leaf morphogenesis);GO:0010014(meristem initiation);GO:0010073(merist…	-	ATHB-15	3	1585-1606	N
miR166d-5p	GGAATGTTGGCTGGCTCGAGG	TRINITY_DN44850_c0_g2	PREDICTED: DEAD-box ATP-dependent RNA helicase 50 isoform X1 [Juglans regia]	GO:0004004(ATP-dependent RNA helicase activity);GO:0010501(RNA secondary structure unwinding)	ko03040(Spliceosome)	RH50	3	1349-1369	N
miR166f-5p	GGAATGTTGTCTGGCTCGAGG	TRINITY_DN9460_c0_g1	-	-	-	-	4	140-159	N
miR166g	TCCCGGACCAGGCTTCATTCC	TRINITY_DN41167_c0_g3	PREDICTED: homeobox-leucine zipper protein ATHB-15 [Vitis vinifera]	GO:0003677(DNA binding);GO:0003700(transcription factor activity, sequence-specific DNA binding);GO:0005634(nucleus);GO:0006351(transcription, DNA-templated);GO:0006355(regulation of transcription, DNA-templated);GO:0008289(lipid binding);GO:0009855(determination of bilateral symmetry);GO:0009887(organ morphogenesis);GO:0009965(leaf morphogenesis);GO:0010014(meristem initiation);GO:0010073(merist…	-	ATHB-15	3	1587-1607	N
miR166g	TCCCGGACCAGGCTTCATTCC	TRINITY_DN45919_c1_g1	PREDICTED: auxin-responsive protein SAUR36-like [Juglans regia]	GO:0005739(mitochondrion);GO:0009733(response to auxin)	ko04075(Plant hormone signal transduction)	SAUR36	4	336-355	N
miR167a	TGAAGCTGCCAGCATGATCTT	TRINITY_DN38852_c0_g1	PREDICTED: uncharacterized protein LOC109021186 isoform X2 [Juglans regia]	GO:0005739(mitochondrion)	-	-	4	1108-1129	N
miR167a	TGAAGCTGCCAGCATGATCTT	TRINITY_DN41726_c0_g5	PREDICTED: phosphatidylinositol/phosphatidylcholine transfer protein SFH8-like isoform X2 [Juglans regia]	GO:0000139(Golgi membrane);GO:0005215(transporter activity);GO:0005622(intracellular);GO:0005739(mitochondrion);GO:0005794(Golgi apparatus);GO:0005886(plasma membrane);GO:0006810(transport);GO:0015031(protein transport)	ko00970(Aminoacyl-tRNA biosynthesis)	SFH8	4	1401-1420	N
miR167a-3p	AGATCATGCGGCAGTTTCACC	TRINITY_DN40453_c0_g6	-	-	-	-	3.5	188-209	N
miR167b	TGAAGCTGCCAGCATGATCTA	TRINITY_DN41646_c0_g5	PREDICTED: uncharacterized protein LOC109021860 [Juglans regia]	GO:0003674(molecular_function);GO:0005739(mitochondrion);GO:0008150(biological_process);GO:0016021(integral component of membrane)	-	-	4	612-631	N
miR167b	TGAAGCTGCCAGCATGATCTA	TRINITY_DN52134_c0_g1	PREDICTED: paired amphipathic helix protein Sin3-like 2 [Juglans regia]	GO:0000118(histone deacetylase complex);GO:0000122(negative regulation of transcription from RNA polymerase II promoter);GO:0000785(chromatin);GO:0001106(RNA polymerase II transcription corepressor activity);GO:0004407(histone deacetylase activity);GO:0016575(histone deacetylation)	-	SNL2	4	2842-2861	N
miR167b-3p	GGTCATGCTCTGACAGCCTCACT	TRINITY_DN38215_c0_g4	PREDICTED: uncharacterized protein LOC109011945 isoform X1 [Juglans regia]	GO:0003674(molecular_function);GO:0008150(biological_process)	-	-	4	872-893	N
miR167c	TAAAGCTGCCAGCATGATCTGG	TRINITY_DN53751_c0_g1	UPF0706 protein At5g01750 family [Cajanus cajan]	GO:0006952(defense response)	-	At5g01750	4	946-966	N
miR167c-3p	AGGTCATCTTGCAGCTTCAAT	TRINITY_DN47420_c0_g1	PREDICTED: protein PAIR1 [Juglans regia]	-	-	-	4	602-621	N
miR167c-3p	AGGTCATCTTGCAGCTTCAAT	TRINITY_DN48311_c0_g1	-	-	-	-	4	228-247	N
miR167d	TGAAGCTGCCAGCATGATCTGA	TRINITY_DN41344_c0_g1	PREDICTED: threonine synthase, chloroplastic-like [Pyrus x bretschneideri]	GO:0004795(threonine synthase activity);GO:0005737(cytoplasm);GO:0030170(pyridoxal phosphate binding)	ko01230(Biosynthesis of amino acids);ko00260(Glycine, serine and threonine metabolism);ko00750(Vitamin B6 metabolism)	TS1	4	625-645	N
miR167e-3p	GATCATGTTGGCAGCTTCACC	TRINITY_DN40453_c0_g6	-	-	-	-	2	188-208	N
miR168a-3p	CCCGCCTTGCATCAACTGAAT	TRINITY_DN55478_c1_g1	PREDICTED: uncharacterized protein LOC109005986 [Juglans regia]	GO:0000166(nucleotide binding);GO:0005737(cytoplasm);GO:0008150(biological_process);GO:0080008(Cul4-RING E3 ubiquitin ligase complex)	-	-	4	2476-2496	N
miR168b	TCGCTTGGTGCAGATCGGGAC	TRINITY_DN70_c0_g1	-	-	-	-	4	128-149	N
miR169a-3p	CCTTGGCTCACCTTCGCTCTC	TRINITY_DN49701_c0_g4	PREDICTED: uncharacterized protein LOC108867939 [Pyrus x bretschneideri]	-	-	-	4	153-174	N
miR169b	TAGCCAAGAATGACTTGCC	TRINITY_DN36935_c0_g4	PREDICTED: probable alkaline/neutral invertase B [Juglans regia]	GO:0004564(beta-fructofuranosidase activity);GO:0004575(sucrose alpha-glucosidase activity);GO:0005634(nucleus);GO:0005829(cytosol);GO:0005975(carbohydrate metabolic process);GO:0033926(glycopeptide alpha-N-acetylgalactosaminidase activity)	ko03010(Ribosome)	INVB	4	1672-1690	N
miR169b	TAGCCAAGAATGACTTGCC	TRINITY_DN39701_c1_g1	PREDICTED: uncharacterized protein LOC108995050 [Juglans regia]	GO:0005634(nucleus);GO:0008150(biological_process);GO:0008270(zinc ion binding);GO:0009506(plasmodesma)	-	-	4	155-172	N
miR169b	TAGCCAAGAATGACTTGCC	TRINITY_DN43584_c0_g3	PREDICTED: nuclear transcription factor Y subunit A-1-like isoform X1 [Juglans regia]	GO:0003677(DNA binding);GO:0003700(transcription factor activity, sequence-specific DNA binding);GO:0005634(nucleus);GO:0006351(transcription, DNA-templated);GO:0006355(regulation of transcription, DNA-templated);GO:0009555(pollen development);GO:0009793(embryo development ending in seed dormancy);GO:0010262(somatic embryogenesis);GO:0016602(CCAAT-binding factor complex);GO:0045892(negative regul…	ko00970(Aminoacyl-tRNA biosynthesis)	NFYA9	2	1309-1327	N
miR169b	TAGCCAAGAATGACTTGCC	TRINITY_DN44229_c0_g1	PREDICTED: mast cell carboxypeptidase A isoform X1 [Juglans regia]	GO:0004181(metallocarboxypeptidase activity);GO:0005615(extracellular space)	-	-	4	1042-1060	N
miR169b	TAGCCAAGAATGACTTGCC	TRINITY_DN45138_c0_g2	PREDICTED: glycosyltransferase family protein 64 protein C5 [Juglans regia]	GO:0006024(glycosaminoglycan biosynthetic process);GO:0006486(protein glycosylation);GO:0015012(heparan sulfate proteoglycan biosynthetic process);GO:0016021(integral component of membrane);GO:0016740(transferase activity);GO:0016757(transferase activity, transferring glycosyl groups);GO:0046872(metal ion binding)	-	At5g04500	3.5	269-287	N
miR169b	TAGCCAAGAATGACTTGCC	TRINITY_DN47480_c0_g2	PREDICTED: probable indole-3-acetic acid-amido synthetase GH3.6 [Juglans regia]	GO:0009416(response to light stimulus);GO:0009733(response to auxin)	ko04075(Plant hormone signal transduction)	GH3.6	4	655-673	N
miR169b	TAGCCAAGAATGACTTGCC	TRINITY_DN47799_c0_g3	PREDICTED: homeobox-DDT domain protein RLT2-like isoform X1 [Juglans regia]	GO:0003677(DNA binding);GO:0003700(transcription factor activity, sequence-specific DNA binding);GO:0005515(protein binding);GO:0005634(nucleus);GO:0006351(transcription, DNA-templated);GO:0006355(regulation of transcription, DNA-templated);GO:0009908(flower development);GO:0010228(vegetative to reproductive phase transition of meristem)	-	RLT2	3	1414-1431	N
miR169b	TAGCCAAGAATGACTTGCC	TRINITY_DN49712_c0_g1	-	-	-	-	3.5	129-147	N
miR169b	TAGCCAAGAATGACTTGCC	TRINITY_DN51181_c0_g2	PREDICTED: plasma membrane ATPase 3 isoform X1 [Ricinus communis]	GO:0005887(integral component of plasma membrane);GO:0008553(hydrogen-exporting ATPase activity, phosphorylative mechanism);GO:0043231(intracellular membrane-bounded organelle);GO:0051453(regulation of intracellular pH);GO:1902600(hydrogen ion transmembrane transport)	ko00190(Oxidative phosphorylation)	PMA1	3	363-381	N
miR169b	TAGCCAAGAATGACTTGCC	TRINITY_DN52881_c0_g3	PREDICTED: oleoyl-acyl carrier protein thioesterase 1, chloroplastic-like [Juglans regia]	GO:0000036(ACP phosphopantetheine attachment site binding involved in fatty acid biosynthetic process);GO:0004320(oleoyl-[acyl-carrier-protein] hydrolase activity);GO:0006633(fatty acid biosynthetic process);GO:0009507(chloroplast);GO:0016295(myristoyl-[acyl-carrier-protein] hydrolase activity);GO:0016296(palmitoyl-[acyl-carrier-protein] hydrolase activity);GO:0016297(acyl-[acyl-carrier-protein] …	ko00061(Fatty acid biosynthesis)	FATA	4	1177-1194	N
miR169b	TAGCCAAGAATGACTTGCC	TRINITY_DN53413_c0_g1	PREDICTED: nuclear transcription factor Y subunit A-3-like [Juglans regia]	GO:0003677(DNA binding);GO:0003700(transcription factor activity, sequence-specific DNA binding);GO:0005634(nucleus);GO:0006351(transcription, DNA-templated);GO:0006355(regulation of transcription, DNA-templated);GO:0016602(CCAAT-binding factor complex)	ko00970(Aminoacyl-tRNA biosynthesis)	NFYA3	4	2170-2188	N
miR169b	TAGCCAAGAATGACTTGCC	TRINITY_DN55049_c0_g2	-	-	-	-	3.5	8-26	N
miR169b	TAGCCAAGAATGACTTGCC	TRINITY_DN56160_c0_g1	PREDICTED: cystinosin homolog [Juglans regia]	GO:0005774(vacuolar membrane);GO:0015184(L-cystine transmembrane transporter activity);GO:0015811(L-cystine transport)	-	At5g40670	4	1322-1340	N
miR169d	TAGCCAAGGATGACTTGCCTG	TRINITY_DN39693_c0_g1	PREDICTED: uncharacterized protein LOC100254417 isoform X3 [Vitis vinifera]	GO:0004029(aldehyde dehydrogenase (NAD) activity);GO:0004491(methylmalonate-semialdehyde dehydrogenase (acylating) activity);GO:0018478(malonate-semialdehyde dehydrogenase (acetylating) activity)	ko01200(Carbon metabolism);ko00640(Propanoate metabolism);ko00562(Inositol phosphate metabolism);ko00280(Valine, leucine and isoleucine dkoadation);ko00410(beta-Alanine metabolism)	-	4	470-490	N
miR169d	TAGCCAAGGATGACTTGCCTG	TRINITY_DN43584_c0_g3	PREDICTED: nuclear transcription factor Y subunit A-1-like isoform X1 [Juglans regia]	GO:0003677(DNA binding);GO:0003700(transcription factor activity, sequence-specific DNA binding);GO:0005634(nucleus);GO:0006351(transcription, DNA-templated);GO:0006355(regulation of transcription, DNA-templated);GO:0009555(pollen development);GO:0009793(embryo development ending in seed dormancy);GO:0010262(somatic embryogenesis);GO:0016602(CCAAT-binding factor complex);GO:0045892(negative regul…	ko00970(Aminoacyl-tRNA biosynthesis)	NFYA9	4	1307-1327	N
miR169d	TAGCCAAGGATGACTTGCCTG	TRINITY_DN53413_c0_g1	PREDICTED: nuclear transcription factor Y subunit A-3-like [Juglans regia]	GO:0003677(DNA binding);GO:0003700(transcription factor activity, sequence-specific DNA binding);GO:0005634(nucleus);GO:0006351(transcription, DNA-templated);GO:0006355(regulation of transcription, DNA-templated);GO:0016602(CCAAT-binding factor complex)	ko00970(Aminoacyl-tRNA biosynthesis)	NFYA3	2	2168-2188	N
miR169f	CAGCCAAGGATGACTTGCCGA	TRINITY_DN43584_c0_g3	PREDICTED: nuclear transcription factor Y subunit A-1-like isoform X1 [Juglans regia]	GO:0003677(DNA binding);GO:0003700(transcription factor activity, sequence-specific DNA binding);GO:0005634(nucleus);GO:0006351(transcription, DNA-templated);GO:0006355(regulation of transcription, DNA-templated);GO:0009555(pollen development);GO:0009793(embryo development ending in seed dormancy);GO:0010262(somatic embryogenesis);GO:0016602(CCAAT-binding factor complex);GO:0045892(negative regul…	ko00970(Aminoacyl-tRNA biosynthesis)	NFYA9	4	1307-1327	N
miR169f	CAGCCAAGGATGACTTGCCGA	TRINITY_DN44400_c1_g3	PREDICTED: uncharacterized protein LOC108987672 [Juglans regia]	GO:0005739(mitochondrion)	-	-	4	228-248	N
miR169f	CAGCCAAGGATGACTTGCCGA	TRINITY_DN53413_c0_g1	PREDICTED: nuclear transcription factor Y subunit A-3-like [Juglans regia]	GO:0003677(DNA binding);GO:0003700(transcription factor activity, sequence-specific DNA binding);GO:0005634(nucleus);GO:0006351(transcription, DNA-templated);GO:0006355(regulation of transcription, DNA-templated);GO:0016602(CCAAT-binding factor complex)	ko00970(Aminoacyl-tRNA biosynthesis)	NFYA3	3	2167-2188	N
miR169g-5p	AGAGAGAGTGGAGTTGAGCC	TRINITY_DN20132_c0_g2	Protein phosphatase 2C 2, partial [Anthurium amnicola]	GO:0000173(inactivation of MAPK activity involved in osmosensory signaling pathway);GO:0004722(protein serine/threonine phosphatase activity);GO:0005634(nucleus);GO:0005829(cytosol);GO:0006470(protein dephosphorylation);GO:0009405(pathogenesis);GO:0031505(fungal-type cell wall organization);GO:0042710(biofilm formation);GO:0043169(cation binding);GO:0071470(cellular response to osmotic stress)	-	ptc3	4	28-46	N
miR169g-5p	AGAGAGAGTGGAGTTGAGCC	TRINITY_DN35631_c0_g1	hypothetical protein L484_002744 [Morus notabilis]	GO:0005768(endosome);GO:0005794(Golgi apparatus);GO:0005802(trans-Golgi network);GO:0005886(plasma membrane);GO:0008514(organic anion transmembrane transporter activity);GO:0008643(carbohydrate transport);GO:0016021(integral component of membrane)	-	At4g32390	4	417-435	N
miR169g-5p	AGAGAGAGTGGAGTTGAGCC	TRINITY_DN37204_c0_g1	PREDICTED: putative kinase-like protein TMKL1 [Juglans regia]	GO:0004672(protein kinase activity);GO:0005524(ATP binding);GO:0005886(plasma membrane);GO:0006468(protein phosphorylation);GO:0016021(integral component of membrane);GO:0016301(kinase activity);GO:0016310(phosphorylation)	ko04075(Plant hormone signal transduction)	TMKL1	4	1853-1873	N
miR169g-5p	AGAGAGAGTGGAGTTGAGCC	TRINITY_DN39956_c0_g3	-	-	-	-	4	406-426	N
miR169g-5p	AGAGAGAGTGGAGTTGAGCC	TRINITY_DN41722_c1_g7	PREDICTED: autophagy-related protein 13b [Ziziphus jujuba]	GO:0005634(nucleus);GO:0005776(autophagosome);GO:0006914(autophagy);GO:0015031(protein transport);GO:0031410(cytoplasmic vesicle);GO:1990316(ATG1/ULK1 kinase complex)	ko04140(Rkolation of autophagy)	ATG13B	4	29-48	N
miR169g-5p	AGAGAGAGTGGAGTTGAGCC	TRINITY_DN42983_c2_g1	PREDICTED: probable CCR4-associated factor 1 homolog 7 [Juglans regia]	GO:0000175(3'-5'-exoribonuclease activity);GO:0000288(nuclear-transcribed mRNA catabolic process, deadenylation-dependent decay);GO:0030014(CCR4-NOT complex)	ko03018(RNA dkoadation)	CAF1-6	4	87-106	N
miR169g-5p	AGAGAGAGTGGAGTTGAGCC	TRINITY_DN44432_c0_g9	PREDICTED: protein HAIKU1-like [Juglans regia]	GO:0005515(protein binding);GO:0005634(nucleus);GO:0009960(endosperm development);GO:0043078(polar nucleus);GO:0080113(regulation of seed growth)	ko04144(Endocytosis)	IKU1	4	1414-1434	N
miR169g-5p	AGAGAGAGTGGAGTTGAGCC	TRINITY_DN44568_c0_g2	PREDICTED: blue-light photoreceptor PHR2-like isoform X2 [Juglans regia]	GO:0003913(DNA photolyase activity);GO:0005634(nucleus);GO:0006281(DNA repair);GO:0009881(photoreceptor activity);GO:0018298(protein-chromophore linkage)	ko01200(Carbon metabolism);ko00020(korate cycle (TCA cycle));ko00190(Oxidative phosphorylation)	PHR2	4	213-232	N
miR169g-5p	AGAGAGAGTGGAGTTGAGCC	TRINITY_DN44591_c0_g7	PREDICTED: uncharacterized protein LOC109005952 [Juglans regia]	GO:0003674(molecular_function);GO:0005739(mitochondrion);GO:0008150(biological_process)	-	-	3.5	104-122	N
miR169g-5p	AGAGAGAGTGGAGTTGAGCC	TRINITY_DN44929_c1_g2	PREDICTED: presequence protease 1, chloroplastic/mitochondrial-like [Juglans regia]	GO:0004222(metalloendopeptidase activity);GO:0008270(zinc ion binding);GO:0016485(protein processing)	-	PREP1	4	23-42	N
miR169g-5p	AGAGAGAGTGGAGTTGAGCC	TRINITY_DN45492_c0_g5	PREDICTED: E3 ubiquitin-protein ligase MBR2 isoform X1 [Juglans regia]	GO:0043161(proteasome-mediated ubiquitin-dependent protein catabolic process);GO:0061630(ubiquitin protein ligase activity)	-	-	4	15-33	N
miR169g-5p	AGAGAGAGTGGAGTTGAGCC	TRINITY_DN47182_c0_g1	PREDICTED: uncharacterized protein LOC109004752 [Juglans regia]	GO:0009507(chloroplast)	-	-	4	188-206	N
miR169g-5p	AGAGAGAGTGGAGTTGAGCC	TRINITY_DN47221_c1_g6	-	-	-	-	4	109-128	N
miR169g-5p	AGAGAGAGTGGAGTTGAGCC	TRINITY_DN48052_c0_g3	-	-	-	-	4	396-415	N
miR169g-5p	AGAGAGAGTGGAGTTGAGCC	TRINITY_DN48504_c1_g1	PREDICTED: glycine-rich domain-containing protein 1-like [Juglans regia]	GO:0003674(molecular_function);GO:0005634(nucleus);GO:0005737(cytoplasm);GO:0005886(plasma membrane);GO:0006970(response to osmotic stress);GO:0009738(abscisic acid-activated signaling pathway)	-	GRDP1	2.5	1008-1027	N
miR169g-5p	AGAGAGAGTGGAGTTGAGCC	TRINITY_DN51303_c0_g1	PREDICTED: putative glycosyltransferase 7 [Juglans regia]	GO:0000139(Golgi membrane);GO:0005768(endosome);GO:0005794(Golgi apparatus);GO:0005802(trans-Golgi network);GO:0008378(galactosyltransferase activity);GO:0010192(mucilage biosynthetic process);GO:0010214(seed coat development);GO:0010392(galactoglucomannan metabolic process);GO:0016021(integral component of membrane);GO:0016740(transferase activity);GO:0016757(transferase activity, transferring g…	ko00010(Glycolysis / Gluconeogenesis);ko00620(Pyruvate metabolism);ko00640(Propanoate metabolism);ko00270(Cysteine and methionine metabolism)	GT7	4	175-195	N
miR169g-5p	AGAGAGAGTGGAGTTGAGCC	TRINITY_DN52704_c0_g2	hypothetical protein POPTR_0002s12780g [Populus trichocarpa]	GO:0006694(steroid biosynthetic process);GO:0015248(sterol transporter activity);GO:0015914(phospholipid transport);GO:0030301(cholesterol transport);GO:0032385(positive regulation of intracellular cholesterol transport);GO:0032934(sterol binding)	-	Hsd17b4	4	194-212	N
miR169g-5p	AGAGAGAGTGGAGTTGAGCC	TRINITY_DN53998_c1_g2	PREDICTED: uncharacterized protein LOC109001867 [Juglans regia]	GO:0003674(molecular_function);GO:0008150(biological_process);GO:0009507(chloroplast)	-	FAM214B	3	1520-1539	N
miR169h	TAGCCAAGAATGACTTGCCTG	TRINITY_DN37092_c0_g8	60S ribosomal protein L21 [Populus trichocarpa]	GO:0003735(structural constituent of ribosome);GO:0006412(translation);GO:0022625(cytosolic large ribosomal subunit)	ko03010(Ribosome)	RPL21	4	289-308	N
miR169h	TAGCCAAGAATGACTTGCCTG	TRINITY_DN43584_c0_g3	PREDICTED: nuclear transcription factor Y subunit A-1-like isoform X1 [Juglans regia]	GO:0003677(DNA binding);GO:0003700(transcription factor activity, sequence-specific DNA binding);GO:0005634(nucleus);GO:0006351(transcription, DNA-templated);GO:0006355(regulation of transcription, DNA-templated);GO:0009555(pollen development);GO:0009793(embryo development ending in seed dormancy);GO:0010262(somatic embryogenesis);GO:0016602(CCAAT-binding factor complex);GO:0045892(negative regul…	ko00970(Aminoacyl-tRNA biosynthesis)	NFYA9	3	1307-1327	N
miR169h	TAGCCAAGAATGACTTGCCTG	TRINITY_DN51181_c0_g2	PREDICTED: plasma membrane ATPase 3 isoform X1 [Ricinus communis]	GO:0005887(integral component of plasma membrane);GO:0008553(hydrogen-exporting ATPase activity, phosphorylative mechanism);GO:0043231(intracellular membrane-bounded organelle);GO:0051453(regulation of intracellular pH);GO:1902600(hydrogen ion transmembrane transport)	ko00190(Oxidative phosphorylation)	PMA1	4	361-381	N
miR169h	TAGCCAAGAATGACTTGCCTG	TRINITY_DN53413_c0_g1	PREDICTED: nuclear transcription factor Y subunit A-3-like [Juglans regia]	GO:0003677(DNA binding);GO:0003700(transcription factor activity, sequence-specific DNA binding);GO:0005634(nucleus);GO:0006351(transcription, DNA-templated);GO:0006355(regulation of transcription, DNA-templated);GO:0016602(CCAAT-binding factor complex)	ko00970(Aminoacyl-tRNA biosynthesis)	NFYA3	4	2168-2188	N
miR169h	TAGCCAAGAATGACTTGCCTG	TRINITY_DN55049_c0_g2	-	-	-	-	4	6-26	N
miR171a	TGATTGAGCCGTGCCAATATC	TRINITY_DN36861_c1_g2	-	-	-	-	4	88-107	N
miR171b	TGATTGAGCCGTGCCAATATC	TRINITY_DN36861_c1_g2	-	-	-	-	4	88-107	N
miR171c	TTGAGCCGCGCCAATATCACT	TRINITY_DN37678_c0_g2	-	-	-	-	4	243-262	N
miR171c	TTGAGCCGCGCCAATATCACT	TRINITY_DN51009_c0_g3	3'-5'-exoribonuclease family protein isoform 1 [Theobroma cacao]	GO:0000176(nuclear exosome (RNase complex));GO:0000177(cytoplasmic exosome (RNase complex));GO:0005730(nucleolus);GO:0016075(rRNA catabolic process);GO:0031125(rRNA 3'-end processing);GO:0034427(nuclear-transcribed mRNA catabolic process, exonucleolytic, 3'-5');GO:0034475(U4 snRNA 3'-end processing);GO:0071028(nuclear mRNA surveillance);GO:0071051(polyadenylation-dependent snoRNA 3'-end processin…	ko03018(RNA dkoadation)	RRP41L	4	283-302	N
miR171c-3p	CGATGTTGGTGAGGTTCAATC	TRINITY_DN36426_c0_g17	PREDICTED: 40S ribosomal protein SA-like [Brachypodium distachyon]	GO:0000028(ribosomal small subunit assembly);GO:0000447(endonucleolytic cleavage in ITS1 to separate SSU-rRNA from 5.8S rRNA and LSU-rRNA from tricistronic rRNA transcript (SSU-rRNA, 5.8S rRNA, LSU-rRNA));GO:0000461(endonucleolytic cleavage to generate mature 3'-end of SSU-rRNA from (SSU-rRNA, 5.8S rRNA, LSU-rRNA));GO:0003735(structural constituent of ribosome);GO:0006407(rRNA export from nucleus…	ko03010(Ribosome)	CHLREDRAFT_126059	4	81-101	N
miR171e	TTGAGCCGTGCCAATATCACA	TRINITY_DN46096_c0_g3	PREDICTED: F-box protein PP2-B15-like [Juglans regia]	GO:0005634(nucleus);GO:0030246(carbohydrate binding)	-	PP2B15	3	465-485	N
miR171e	TTGAGCCGTGCCAATATCACA	TRINITY_DN54684_c0_g4	PREDICTED: G-type lectin S-receptor-like serine/threonine-protein kinase At4g27290 [Juglans regia]	GO:0004674(protein serine/threonine kinase activity);GO:0005886(plasma membrane);GO:0006468(protein phosphorylation);GO:0009506(plasmodesma);GO:0031625(ubiquitin protein ligase binding);GO:0045087(innate immune response)	ko00520(Amino sugar and nucleotide sugar metabolism)	B120	4	356-376	N
miR172a	AGAATCTTGATGATGCTGCTT	TRINITY_DN38563_c0_g1	PREDICTED: uncharacterized protein LOC108999205 isoform X2 [Juglans regia]	GO:0005634(nucleus);GO:0016579(protein deubiquitination);GO:0036459(thiol-dependent ubiquitinyl hydrolase activity);GO:0046872(metal ion binding)	-	-	4	2905-2925	N
miR172a	AGAATCTTGATGATGCTGCTT	TRINITY_DN42062_c0_g9	component of cytosolic 80S ribosome and 60S large subunit [Volvox carteri f. nagariensis]	GO:0002181(cytoplasmic translation);GO:0003735(structural constituent of ribosome);GO:0022625(cytosolic large ribosomal subunit)	ko03010(Ribosome)	Rpl36	4	169-188	N
miR172a	AGAATCTTGATGATGCTGCTT	TRINITY_DN45745_c0_g7	PREDICTED: protein Mpv17-like [Juglans regia]	GO:0003674(molecular_function);GO:0005739(mitochondrion);GO:0005778(peroxisomal membrane);GO:0008150(biological_process);GO:0016021(integral component of membrane)	ko04146(Peroxisome)	sym-1	4	373-392	N
miR172a	AGAATCTTGATGATGCTGCTT	TRINITY_DN49829_c0_g2	APETALA2 [Betula platyphylla]	GO:0003677(DNA binding);GO:0003700(transcription factor activity, sequence-specific DNA binding);GO:0005634(nucleus);GO:0006351(transcription, DNA-templated);GO:0006355(regulation of transcription, DNA-templated);GO:0009908(flower development);GO:0010073(meristem maintenance);GO:0010093(specification of floral organ identity);GO:0019953(sexual reproduction);GO:0030154(cell differentiation);GO:004…	ko04075(Plant hormone signal transduction)	AP2	4	1564-1584	N
miR172a	AGAATCTTGATGATGCTGCTT	TRINITY_DN54120_c0_g5	PREDICTED: LOB domain-containing protein 1 [Theobroma cacao]	GO:0005634(nucleus);GO:0008150(biological_process)	ko00511(Other glycan dkoadation)	LBD11	4	289-308	N
miR172a-5p	GCAGCATCATTAAGATTCAC	TRINITY_DN38216_c0_g8	PREDICTED: glutamic acid-rich protein [Juglans regia]	GO:0003674(molecular_function);GO:0005634(nucleus);GO:0008150(biological_process)	-	-	4	1896-1914	N
miR172a-5p	GCAGCATCATTAAGATTCAC	TRINITY_DN39292_c0_g1	PREDICTED: protein NLP6-like isoform X1 [Juglans regia]	GO:0003677(DNA binding);GO:0003700(transcription factor activity, sequence-specific DNA binding);GO:0005634(nucleus);GO:0006351(transcription, DNA-templated);GO:0006355(regulation of transcription, DNA-templated)	-	NLP6	3.5	1913-1931	N
miR172a-5p	GCAGCATCATTAAGATTCAC	TRINITY_DN39823_c1_g2	PREDICTED: uncharacterized protein LOC105119742 [Populus euphratica]	GO:0003674(molecular_function);GO:0005576(extracellular region);GO:0008150(biological_process)	-	-	4	82-100	N
miR172a-5p	GCAGCATCATTAAGATTCAC	TRINITY_DN41629_c1_g4	PREDICTED: ATP-citrate synthase alpha chain protein 3 [Juglans regia]	GO:0003878(ATP citrate synthase activity);GO:0005524(ATP binding);GO:0005737(cytoplasm);GO:0005829(cytosol);GO:0006085(acetyl-CoA biosynthetic process);GO:0006629(lipid metabolic process);GO:0009346(citrate lyase complex)	ko00020(korate cycle (TCA cycle))	ACLA-2	4	1560-1578	N
miR172a-5p	GCAGCATCATTAAGATTCAC	TRINITY_DN42906_c0_g1	PREDICTED: ribonucleoside-diphosphate reductase large subunit [Juglans regia]	GO:0004748(ribonucleoside-diphosphate reductase activity, thioredoxin disulfide as acceptor);GO:0005971(ribonucleoside-diphosphate reductase complex);GO:0009263(deoxyribonucleotide biosynthetic process)	ko00230(Purine metabolism);ko00240(Pyrimidine metabolism);ko00480(Glutkoione metabolism)	RNR1	4	872-890	N
miR172a-5p	GCAGCATCATTAAGATTCAC	TRINITY_DN44049_c0_g6	-	-	-	-	3.5	146-165	N
miR172a-5p	GCAGCATCATTAAGATTCAC	TRINITY_DN46126_c0_g3	PREDICTED: uncharacterized protein LOC109020614 [Juglans regia]	-	-	-	3.5	1092-1111	N
miR172a-5p	GCAGCATCATTAAGATTCAC	TRINITY_DN46289_c0_g1	PREDICTED: copper-transporting ATPase PAA1, chloroplastic [Juglans regia]	GO:0005887(integral component of plasma membrane);GO:0043231(intracellular membrane-bounded organelle);GO:0043682(copper-transporting ATPase activity)	-	PAA1	3.5	565-583	N
miR172a-5p	GCAGCATCATTAAGATTCAC	TRINITY_DN48320_c1_g5	PREDICTED: uncharacterized protein LOC108981175 [Juglans regia]	GO:0003674(molecular_function);GO:0005737(cytoplasm);GO:0005829(cytosol);GO:0005886(plasma membrane);GO:0008150(biological_process)	-	-	3.5	3205-3224	N
miR172a-5p	GCAGCATCATTAAGATTCAC	TRINITY_DN49134_c0_g1	-	-	-	-	3.5	437-457	N
miR172a-5p	GCAGCATCATTAAGATTCAC	TRINITY_DN50430_c0_g1	hypothetical protein VOLCADRAFT_77768 [Volvox carteri f. nagariensis]	GO:0003723(RNA binding);GO:0004818(glutamate-tRNA ligase activity);GO:0004819(glutamine-tRNA ligase activity);GO:0005739(mitochondrion);GO:0005829(cytosol);GO:0006424(glutamyl-tRNA aminoacylation);GO:0006425(glutaminyl-tRNA aminoacylation)	ko00860(Porphyrin and chlorophyll metabolism);ko00970(Aminoacyl-tRNA biosynthesis)	EPRS	4	1159-1177	N
miR172a-5p	GCAGCATCATTAAGATTCAC	TRINITY_DN50708_c0_g1	PREDICTED: uncharacterized ATP-dependent helicase C29A10.10c-like [Juglans regia]	GO:0005634(nucleus);GO:0008150(biological_process);GO:0009506(plasmodesma);GO:0016787(hydrolase activity)	ko03013(RNA transport);ko03015(mRNA surveillance pkoway)	sen1	4	1931-1949	N
miR172a-5p	GCAGCATCATTAAGATTCAC	TRINITY_DN50849_c0_g1	PREDICTED: serine protease SPPA, chloroplastic-like [Juglans regia]	GO:0004252(serine-type endopeptidase activity);GO:0005886(plasma membrane);GO:0006465(signal peptide processing);GO:0006508(proteolysis);GO:0009507(chloroplast);GO:0009534(chloroplast thylakoid);GO:0009535(chloroplast thylakoid membrane);GO:0009570(chloroplast stroma);GO:0009642(response to light intensity);GO:0009941(chloroplast envelope);GO:0016021(integral component of membrane)	-	SPPA	4	317-335	N
miR172a-5p	GCAGCATCATTAAGATTCAC	TRINITY_DN54717_c0_g1	phenylalanine ammonia-lyase 1 [Betula platyphylla]	GO:0005515(protein binding);GO:0005737(cytoplasm);GO:0006559(L-phenylalanine catabolic process);GO:0009800(cinnamic acid biosynthetic process);GO:0045548(phenylalanine ammonia-lyase activity)	ko00360(Phenylalanine metabolism);ko00940(Phenylpropanoid biosynthesis)	PAL	4	370-389	N
miR172b	GGAATCTTGATGATGCTGCAT	TRINITY_DN38563_c0_g1	PREDICTED: uncharacterized protein LOC108999205 isoform X2 [Juglans regia]	GO:0005634(nucleus);GO:0016579(protein deubiquitination);GO:0036459(thiol-dependent ubiquitinyl hydrolase activity);GO:0046872(metal ion binding)	-	-	3	2906-2925	N
miR172b	GGAATCTTGATGATGCTGCAT	TRINITY_DN43864_c0_g8	PREDICTED: kinesin-like protein KIN-7K, chloroplastic isoform X1 [Juglans regia]	GO:0003777(microtubule motor activity);GO:0005871(kinesin complex);GO:0007018(microtubule-based movement);GO:0016887(ATPase activity)	ko04144(Endocytosis)	KIN7D	4	1280-1299	N
miR172b	GGAATCTTGATGATGCTGCAT	TRINITY_DN45096_c0_g4	PREDICTED: myb-related protein 2-like [Juglans regia]	GO:0003677(DNA binding);GO:0003700(transcription factor activity, sequence-specific DNA binding);GO:0005634(nucleus);GO:0006351(transcription, DNA-templated);GO:0006355(regulation of transcription, DNA-templated)	ko03013(RNA transport)	MYR2	4	71-90	N
miR172b	GGAATCTTGATGATGCTGCAT	TRINITY_DN45173_c0_g6	PREDICTED: protein indeterminate-domain 7-like isoform X1 [Juglans regia]	GO:0003676(nucleic acid binding);GO:0003700(transcription factor activity, sequence-specific DNA binding);GO:0005515(protein binding);GO:0005634(nucleus);GO:0006351(transcription, DNA-templated);GO:0006355(regulation of transcription, DNA-templated);GO:0044212(transcription regulatory region DNA binding);GO:0046872(metal ion binding)	ko00052(Galactose metabolism);ko00600(Sphingolipid metabolism);ko00531(Glyckominoglycan dkoadation);ko00604(Glycosphingolipid biosynthesis - ganglio series);ko00511(Other glycan dkoadation)	MGP	3	691-710	N
miR172b	GGAATCTTGATGATGCTGCAT	TRINITY_DN49829_c0_g2	APETALA2 [Betula platyphylla]	GO:0003677(DNA binding);GO:0003700(transcription factor activity, sequence-specific DNA binding);GO:0005634(nucleus);GO:0006351(transcription, DNA-templated);GO:0006355(regulation of transcription, DNA-templated);GO:0009908(flower development);GO:0010073(meristem maintenance);GO:0010093(specification of floral organ identity);GO:0019953(sexual reproduction);GO:0030154(cell differentiation);GO:004…	ko04075(Plant hormone signal transduction)	AP2	2	1564-1584	N
miR172b-5p	CAGCATCATCAAGATTCACAA	TRINITY_DN15034_c0_g1	small Arf-related GTPase [Volvox carteri f. nagariensis]	GO:0003924(GTPase activity);GO:0005525(GTP binding);GO:0005575(cellular_component);GO:0005622(intracellular);GO:0007264(small GTPase mediated signal transduction);GO:0008150(biological_process)	ko04144(Endocytosis)	ARFRP1	4	60-80	N
miR172b-5p	CAGCATCATCAAGATTCACAA	TRINITY_DN36489_c0_g3	PREDICTED: alpha-galactosidase-like isoform X1 [Pyrus x bretschneideri]	GO:0009505(plant-type cell wall)	ko00052(Galactose metabolism);ko00561(Glycerolipid metabolism);ko00600(Sphingolipid metabolism);ko00603(Glycosphingolipid biosynthesis - globo series)	AGAL2	4	151-172	N
miR172b-5p	CAGCATCATCAAGATTCACAA	TRINITY_DN37651_c0_g3	PREDICTED: myosin-binding protein 1-like [Juglans regia]	GO:0005737(cytoplasm);GO:0016021(integral component of membrane);GO:0017022(myosin binding);GO:0030133(transport vesicle)	-	MYOB1	3.5	530-551	N
miR172b-5p	CAGCATCATCAAGATTCACAA	TRINITY_DN38746_c1_g7	PREDICTED: uncharacterized protein LOC108996725 [Juglans regia]	GO:0003674(molecular_function);GO:0008150(biological_process)	-	-	4	1322-1342	N
miR172b-5p	CAGCATCATCAAGATTCACAA	TRINITY_DN39823_c1_g2	PREDICTED: uncharacterized protein LOC105119742 [Populus euphratica]	GO:0003674(molecular_function);GO:0005576(extracellular region);GO:0008150(biological_process)	-	-	4	80-99	N
miR172b-5p	CAGCATCATCAAGATTCACAA	TRINITY_DN41091_c1_g4	PREDICTED: uncharacterized protein LOC109006280 [Juglans regia]	GO:0003674(molecular_function);GO:0005634(nucleus);GO:0008150(biological_process)	-	-	4	593-614	N
miR172b-5p	CAGCATCATCAAGATTCACAA	TRINITY_DN41541_c0_g2	-	-	-	-	4	331-351	N
miR172b-5p	CAGCATCATCAAGATTCACAA	TRINITY_DN41967_c0_g2	-	-	-	-	3.5	726-746	N
miR172b-5p	CAGCATCATCAAGATTCACAA	TRINITY_DN42061_c0_g1	-	-	-	-	4	222-241	N
miR172b-5p	CAGCATCATCAAGATTCACAA	TRINITY_DN42705_c0_g2	PREDICTED: LMBR1 domain-containing protein 2 homolog A isoform X1 [Juglans regia]	GO:0003674(molecular_function);GO:0008150(biological_process);GO:0009507(chloroplast);GO:0016021(integral component of membrane)	-	GA20843	4	836-856	N
miR172b-5p	CAGCATCATCAAGATTCACAA	TRINITY_DN43380_c0_g4	PREDICTED: E2F transcription factor-like E2FE [Juglans regia]	GO:0003677(DNA binding);GO:0003700(transcription factor activity, sequence-specific DNA binding);GO:0005515(protein binding);GO:0005634(nucleus);GO:0005667(transcription factor complex);GO:0006351(transcription, DNA-templated);GO:0006355(regulation of transcription, DNA-templated);GO:0032876(negative regulation of DNA endoreduplication);GO:0042023(DNA endoreduplication)	-	E2FE	4	711-732	N
miR172b-5p	CAGCATCATCAAGATTCACAA	TRINITY_DN48600_c0_g1	PREDICTED: peroxisomal ATPase pex6-like [Juglans regia]	GO:0005634(nucleus);GO:0008568(microtubule-severing ATPase activity);GO:0031122(cytoplasmic microtubule organization)	ko03013(RNA transport)	MSP1	3	2852-2871	N
miR172b-5p	CAGCATCATCAAGATTCACAA	TRINITY_DN52529_c0_g1	PREDICTED: aldehyde dehydrogenase family 2 member C4-like isoform X1 [Juglans regia]	GO:0004029(aldehyde dehydrogenase (NAD) activity)	ko00940(Phenylpropanoid biosynthesis)	ALDH2C4	3	861-881	N
miR172b-5p	CAGCATCATCAAGATTCACAA	TRINITY_DN54403_c0_g1	PREDICTED: leucine--tRNA ligase, chloroplastic/mitochondrial [Juglans regia]	GO:0004823(leucine-tRNA ligase activity);GO:0005739(mitochondrion);GO:0005829(cytosol);GO:0006429(leucyl-tRNA aminoacylation)	ko00970(Aminoacyl-tRNA biosynthesis)	EMB2369	3	2410-2430	N
miR172b-5p	CAGCATCATCAAGATTCACAA	TRINITY_DN56865_c1_g2	PREDICTED: disease resistance protein RPM1-like [Juglans regia]	GO:0005524(ATP binding);GO:0006952(defense response);GO:0043531(ADP binding)	ko04626(Plant-pkogen interaction)	RPP13L3	4	337-358	N
miR1919b	AGCGAGTCATCTGTGACAGG	TRINITY_DN39159_c0_g8	PREDICTED: histone H4-like [Solanum lycopersicum]	GO:0000786(nucleosome);GO:0003677(DNA binding);GO:0005634(nucleus);GO:0005774(vacuolar membrane);GO:0005794(Golgi apparatus);GO:0005829(cytosol);GO:0005886(plasma membrane);GO:0009506(plasmodesma);GO:0009507(chloroplast);GO:0046982(protein heterodimerization activity)	-	-	4	87-107	N
miR1919b	AGCGAGTCATCTGTGACAGG	TRINITY_DN46851_c0_g1	PREDICTED: DNA-directed RNA polymerase II subunit 1, partial [Juglans regia]	GO:0001055(RNA polymerase II activity);GO:0005665(DNA-directed RNA polymerase II, core complex)	ko00230(Purine metabolism);ko00240(Pyrimidine metabolism);ko03020(RNA polymerase)	NRPB1	4	2530-2548	N
miR1919b	AGCGAGTCATCTGTGACAGG	TRINITY_DN50098_c0_g1	PREDICTED: probable serine/threonine-protein kinase At1g01540 [Ricinus communis]	GO:0004674(protein serine/threonine kinase activity);GO:0005524(ATP binding);GO:0005886(plasma membrane);GO:0006468(protein phosphorylation);GO:0016021(integral component of membrane);GO:0016301(kinase activity);GO:0046777(protein autophosphorylation)	ko04626(Plant-pkogen interaction)	At1g01540	4	1339-1358	N
miR1919b	AGCGAGTCATCTGTGACAGG	TRINITY_DN55832_c1_g1	PREDICTED: transcription factor TGA1 [Juglans regia]	GO:0003677(DNA binding);GO:0003700(transcription factor activity, sequence-specific DNA binding);GO:0005515(protein binding);GO:0005516(calmodulin binding);GO:0005634(nucleus);GO:0006351(transcription, DNA-templated);GO:0006355(regulation of transcription, DNA-templated);GO:0042742(defense response to bacterium);GO:0043565(sequence-specific DNA binding);GO:0044212(transcription regulatory region …	ko04075(Plant hormone signal transduction)	TGA1	3	1729-1748	N
miR1919b	AGCGAGTCATCTGTGACAGG	TRINITY_DN57141_c0_g1	PREDICTED: uncharacterized protein LOC106359061 [Brassica napus]	-	-	-	4	377-395	N
miR2111a	TAATCTGCATCCTGAGGTTTA	TRINITY_DN46273_c2_g1	PREDICTED: TMV resistance protein N-like [Juglans regia]	GO:0003700(transcription factor activity, sequence-specific DNA binding);GO:0005515(protein binding);GO:0005524(ATP binding);GO:0005634(nucleus);GO:0005774(vacuolar membrane);GO:0006351(transcription, DNA-templated);GO:0006355(regulation of transcription, DNA-templated);GO:0006952(defense response);GO:0007165(signal transduction);GO:0043531(ADP binding);GO:0043565(sequence-specific DNA binding)	ko04626(Plant-pkogen interaction)	WRKY16	4	73-94	N
miR2111a	TAATCTGCATCCTGAGGTTTA	TRINITY_DN50478_c0_g2	PREDICTED: 40S ribosomal protein S20-1 [Phoenix dactylifera]	GO:0003735(structural constituent of ribosome);GO:0022627(cytosolic small ribosomal subunit)	ko03010(Ribosome)	RPS20B	3.5	134-153	N
miR2950a-3p	TGGTGTGCATGGGATGGAATA	TRINITY_DN42922_c1_g1	PREDICTED: bifunctional protein FolD 4, chloroplastic [Juglans regia]	GO:0004477(methenyltetrahydrofolate cyclohydrolase activity);GO:0004488(methylenetetrahydrofolate dehydrogenase (NADP+) activity);GO:0005829(cytosol);GO:0006730(one-carbon metabolic process)	ko00670(One carbon pool by folate)	FOLD4	3.5	726-745	N
miR2950a-5p	TTCCATCTCTTGCACACTGGA	TRINITY_DN37856_c0_g5	hypothetical protein MANES_17G110100 [Manihot esculenta]	GO:0003924(GTPase activity);GO:0005525(GTP binding);GO:0005622(intracellular);GO:0005623(cell);GO:0005737(cytoplasm);GO:0005773(vacuole);GO:0005794(Golgi apparatus);GO:0005886(plasma membrane);GO:0006886(intracellular protein transport);GO:0006888(ER to Golgi vesicle-mediated transport);GO:0006913(nucleocytoplasmic transport);GO:0007264(small GTPase mediated signal transduction);GO:0016020(membra…	ko04144(Endocytosis)	RABB1C	3.5	492-511	N
miR2950a-5p	TTCCATCTCTTGCACACTGGA	TRINITY_DN39588_c0_g1	PREDICTED: rho-N domain-containing protein 1, chloroplastic isoform X1 [Juglans regia]	GO:0005739(mitochondrion);GO:0005829(cytosol);GO:0006353(DNA-templated transcription, termination);GO:0009507(chloroplast)	-	-	3.5	980-999	N
miR2950a-5p	TTCCATCTCTTGCACACTGGA	TRINITY_DN40324_c0_g5	PREDICTED: F-box only protein 13 [Juglans regia]	GO:0004842(ubiquitin-protein transferase activity);GO:0019005(SCF ubiquitin ligase complex);GO:0031146(SCF-dependent proteasomal ubiquitin-dependent protein catabolic process)	-	FBX13	2.5	277-297	N
miR2950a-5p	TTCCATCTCTTGCACACTGGA	TRINITY_DN42016_c0_g6	PREDICTED: VIN3-like protein 2 [Juglans regia]	GO:0003677(DNA binding);GO:0005515(protein binding);GO:0005634(nucleus);GO:0005677(chromatin silencing complex);GO:0006351(transcription, DNA-templated);GO:0006355(regulation of transcription, DNA-templated);GO:0009409(response to cold);GO:0009506(plasmodesma);GO:0009908(flower development);GO:0010228(vegetative to reproductive phase transition of meristem);GO:0031519(PcG protein complex);GO:0032…	-	VIL2	4	388-407	N
miR2950a-5p	TTCCATCTCTTGCACACTGGA	TRINITY_DN48028_c0_g3	-	-	-	-	4	299-320	N
miR2950a-5p	TTCCATCTCTTGCACACTGGA	TRINITY_DN53829_c0_g5	T4.18 [Malus x robusta]	GO:0004842(ubiquitin-protein transferase activity);GO:0031463(Cul3-RING ubiquitin ligase complex)	-	At1g55270	4	2171-2191	N
miR319a	TTGGACTGAAGGGAGCTCCC	TRINITY_DN39452_c0_g4	PREDICTED: transcription factor GAMYB-like isoform X1 [Juglans regia]	-	-	-	3	106-125	N
miR319a	TTGGACTGAAGGGAGCTCCC	TRINITY_DN47383_c0_g3	-	-	-	-	4	215-234	N
miR319a	TTGGACTGAAGGGAGCTCCC	TRINITY_DN48162_c0_g3	-	-	-	-	3	174-193	N
miR319a	TTGGACTGAAGGGAGCTCCC	TRINITY_DN48480_c0_g4	PREDICTED: probable glutathione S-transferase [Jatropha curcas]	GO:0004364(glutathione transferase activity);GO:0005737(cytoplasm);GO:0006749(glutathione metabolic process);GO:0009407(toxin catabolic process)	ko00480(Glutkoione metabolism)	GSTU7	4	442-461	N
miR319a-5p	GAGCTTTCTTCAGTCCACTC	TRINITY_DN34657_c0_g2	-	-	-	-	3	46-64	N
miR319a-5p	GAGCTTTCTTCAGTCCACTC	TRINITY_DN34828_c0_g1	PREDICTED: fatty acid desaturase 4, chloroplastic [Juglans regia]	GO:0005737(cytoplasm);GO:0031625(ubiquitin protein ligase binding);GO:0061630(ubiquitin protein ligase activity)	-	FAD4	4	904-922	N
miR319a-5p	GAGCTTTCTTCAGTCCACTC	TRINITY_DN36200_c1_g2	40S ribosomal protein S18, partial [Noccaea caerulescens]	GO:0005829(cytosol);GO:0006412(translation);GO:0015935(small ribosomal subunit);GO:0042254(ribosome biogenesis)	ko03010(Ribosome)	RPS18A	4	337-355	N
miR319a-5p	GAGCTTTCTTCAGTCCACTC	TRINITY_DN36657_c0_g4	PREDICTED: uncharacterized protein LOC109009083 [Juglans regia]	GO:0003674(molecular_function);GO:0005634(nucleus);GO:0008150(biological_process)	ko00500(Starch and sucrose metabolism);ko00520(Amino sugar and nucleotide sugar metabolism)	-	4	591-610	N
miR319a-5p	GAGCTTTCTTCAGTCCACTC	TRINITY_DN38910_c1_g1	-	-	-	-	4	601-620	N
miR319a-5p	GAGCTTTCTTCAGTCCACTC	TRINITY_DN39455_c0_g8	hypothetical protein MANES_04G095400 [Manihot esculenta]	GO:0006812(cation transport);GO:0009055(electron carrier activity);GO:0009507(chloroplast);GO:0009570(chloroplast stroma);GO:0009941(chloroplast envelope);GO:0015035(protein disulfide oxidoreductase activity);GO:0015038(glutathione disulfide oxidoreductase activity);GO:0015297(antiporter activity);GO:0045454(cell redox homeostasis);GO:0046872(metal ion binding);GO:0051537(2 iron, 2 sulfur cluster…	-	GRXS14	3.5	1051-1069	N
miR319a-5p	GAGCTTTCTTCAGTCCACTC	TRINITY_DN43926_c0_g5	-	-	-	-	4	14-34	N
miR319a-5p	GAGCTTTCTTCAGTCCACTC	TRINITY_DN44530_c1_g1	hypothetical protein MANES_04G026300 [Manihot esculenta]	GO:0005576(extracellular region);GO:0005886(plasma membrane)	-	ICR3	4	499-517	N
miR319a-5p	GAGCTTTCTTCAGTCCACTC	TRINITY_DN48764_c1_g8	hypothetical protein AXG93_1467s1040 [Marchantia polymorpha subsp. polymorpha]	GO:0000151(ubiquitin ligase complex);GO:0000226(microtubule cytoskeleton organization);GO:0004842(ubiquitin-protein transferase activity);GO:0005515(protein binding);GO:0005634(nucleus);GO:0005737(cytoplasm);GO:0005819(spindle);GO:0005829(cytosol);GO:0005886(plasma membrane);GO:0006511(ubiquitin-dependent protein catabolic process);GO:0007059(chromosome segregation);GO:0007067(mitotic nuclear div…	ko04141(Protein processing in endoplasmic reticulum);ko04120(Ubiquitin mediated proteolysis)	SKP1A	2.5	509-528	N
miR319a-5p	GAGCTTTCTTCAGTCCACTC	TRINITY_DN49794_c4_g1	PREDICTED: phosphoglycerate kinase, cytosolic-like [Juglans regia]	GO:0004618(phosphoglycerate kinase activity);GO:0005524(ATP binding);GO:0005634(nucleus);GO:0005737(cytoplasm);GO:0005774(vacuolar membrane);GO:0005794(Golgi apparatus);GO:0005829(cytosol);GO:0005886(plasma membrane);GO:0006096(glycolytic process);GO:0009506(plasmodesma);GO:0009570(chloroplast stroma);GO:0016020(membrane);GO:0048046(apoplast)	ko01200(Carbon metabolism);ko01230(Biosynthesis of amino acids);ko00010(Glycolysis / Gluconeogenesis);ko00710(Carbon fixation in photosynthetic organisms)	-	4	102-121	N
miR319b	TTGGACTGAAGGGAGCTCCC	TRINITY_DN39452_c0_g4	PREDICTED: transcription factor GAMYB-like isoform X1 [Juglans regia]	-	-	-	3	106-125	N
miR319b	TTGGACTGAAGGGAGCTCCC	TRINITY_DN47383_c0_g3	-	-	-	-	4	215-234	N
miR319b	TTGGACTGAAGGGAGCTCCC	TRINITY_DN48162_c0_g3	-	-	-	-	3	174-193	N
miR319b	TTGGACTGAAGGGAGCTCCC	TRINITY_DN48480_c0_g4	PREDICTED: probable glutathione S-transferase [Jatropha curcas]	GO:0004364(glutathione transferase activity);GO:0005737(cytoplasm);GO:0006749(glutathione metabolic process);GO:0009407(toxin catabolic process)	ko00480(Glutkoione metabolism)	GSTU7	4	442-461	N
miR3627a	TGTCGCAGGAGAGATGGTGCT	TRINITY_DN54269_c0_g1	PREDICTED: formin-like protein 5 isoform X1 [Juglans regia]	-	-	-	4	1476-1497	N
miR3627a	TGTCGCAGGAGAGATGGTGCT	TRINITY_DN57480_c1_g10	PREDICTED: uncharacterized protein LOC108989087 [Juglans regia]	GO:0007165(signal transduction);GO:0016020(membrane)	-	-	3.5	80-100	N
miR390a	AAGCTCAGGAGGGATAGCGCC	TRINITY_DN42497_c0_g2	-	-	-	-	3.5	224-244	N
miR390a	AAGCTCAGGAGGGATAGCGCC	TRINITY_DN42897_c0_g3	PREDICTED: VQ motif-containing protein 11-like [Juglans regia]	GO:0003674(molecular_function);GO:0005634(nucleus);GO:0008150(biological_process)	-	VQ11	2.5	537-557	N
miR390a	AAGCTCAGGAGGGATAGCGCC	TRINITY_DN43666_c1_g1	PREDICTED: DET1- and DDB1-associated protein 1-like isoform X1 [Juglans regia]	GO:0005515(protein binding);GO:0005634(nucleus);GO:0009788(negative regulation of abscisic acid-activated signaling pathway);GO:0032436(positive regulation of proteasomal ubiquitin-dependent protein catabolic process)	ko00900(Terpenoid backbone biosynthesis)	-	4	465-484	N
miR390a	AAGCTCAGGAGGGATAGCGCC	TRINITY_DN47625_c0_g5	PREDICTED: histone-lysine N-methyltransferase, H3 lysine-9 specific SUVH1-like [Juglans regia]	GO:0000775(chromosome, centromeric region);GO:0005634(nucleus);GO:0008270(zinc ion binding);GO:0018024(histone-lysine N-methyltransferase activity);GO:0034968(histone lysine methylation);GO:0040029(regulation of gene expression, epigenetic);GO:0042054(histone methyltransferase activity);GO:0042393(histone binding)	ko00310(Lysine dkoadation)	SUVH1	4	393-413	N
miR390a	AAGCTCAGGAGGGATAGCGCC	TRINITY_DN49893_c2_g10	PREDICTED: putative kinase-like protein TMKL1 [Gossypium raimondii]	GO:0004672(protein kinase activity);GO:0004674(protein serine/threonine kinase activity);GO:0005524(ATP binding);GO:0005886(plasma membrane);GO:0006468(protein phosphorylation);GO:0007169(transmembrane receptor protein tyrosine kinase signaling pathway);GO:0009506(plasmodesma);GO:0016021(integral component of membrane);GO:0016301(kinase activity)	-	TMKL1	4	290-310	N
miR390a	AAGCTCAGGAGGGATAGCGCC	TRINITY_DN50500_c0_g4	PREDICTED: DEAD-box ATP-dependent RNA helicase 21 [Juglans regia]	GO:0000375(RNA splicing, via transesterification reactions);GO:0004004(ATP-dependent RNA helicase activity);GO:0005682(U5 snRNP);GO:0010501(RNA secondary structure unwinding);GO:0071013(catalytic step 2 spliceosome)	ko03040(Spliceosome)	RH21	4	2139-2159	N
miR390a	AAGCTCAGGAGGGATAGCGCC	TRINITY_DN54185_c1_g4	PREDICTED: receptor-like serine/threonine-protein kinase ALE2 [Juglans regia]	GO:0004672(protein kinase activity);GO:0005524(ATP binding);GO:0005886(plasma membrane);GO:0006468(protein phosphorylation);GO:0016021(integral component of membrane);GO:0016301(kinase activity)	ko04626(Plant-pkogen interaction)	ALE2	4	3154-3174	N
miR390a-3p	CGCTATCTATCCTGAGTTTC	TRINITY_DN36098_c0_g9	Ras-related protein Rab-2-B [Dichanthelium oligosanthes]	GO:0005773(vacuole);GO:0006888(ER to Golgi vesicle-mediated transport);GO:0016020(membrane);GO:0020020(food vacuole);GO:0060627(regulation of vesicle-mediated transport)	ko04144(Endocytosis)	rab14	3.5	77-96	N
miR390b	AGCTCAGGAGGGATAGCGCC	TRINITY_DN42497_c0_g2	-	-	-	-	3.5	224-243	N
miR390b	AGCTCAGGAGGGATAGCGCC	TRINITY_DN42596_c0_g2	-	-	-	-	2	158-177	N
miR390b	AGCTCAGGAGGGATAGCGCC	TRINITY_DN42808_c1_g4	PREDICTED: growth-regulating factor 7-like isoform X2 [Juglans regia]	GO:0005515(protein binding);GO:0005524(ATP binding);GO:0005634(nucleus);GO:0006351(transcription, DNA-templated);GO:0006355(regulation of transcription, DNA-templated);GO:0009624(response to nematode);GO:0048364(root development);GO:0048366(leaf development);GO:0061062(regulation of nematode larval development)	-	GRF4	4	277-296	N
miR390b	AGCTCAGGAGGGATAGCGCC	TRINITY_DN42897_c0_g3	PREDICTED: VQ motif-containing protein 11-like [Juglans regia]	GO:0003674(molecular_function);GO:0005634(nucleus);GO:0008150(biological_process)	-	VQ11	3.5	537-556	N
miR390b	AGCTCAGGAGGGATAGCGCC	TRINITY_DN43666_c1_g1	PREDICTED: DET1- and DDB1-associated protein 1-like isoform X1 [Juglans regia]	GO:0005515(protein binding);GO:0005634(nucleus);GO:0009788(negative regulation of abscisic acid-activated signaling pathway);GO:0032436(positive regulation of proteasomal ubiquitin-dependent protein catabolic process)	ko00900(Terpenoid backbone biosynthesis)	-	3	465-483	N
miR390b	AGCTCAGGAGGGATAGCGCC	TRINITY_DN47625_c0_g5	PREDICTED: histone-lysine N-methyltransferase, H3 lysine-9 specific SUVH1-like [Juglans regia]	GO:0000775(chromosome, centromeric region);GO:0005634(nucleus);GO:0008270(zinc ion binding);GO:0018024(histone-lysine N-methyltransferase activity);GO:0034968(histone lysine methylation);GO:0040029(regulation of gene expression, epigenetic);GO:0042054(histone methyltransferase activity);GO:0042393(histone binding)	ko00310(Lysine dkoadation)	SUVH1	4	393-412	N
miR390b	AGCTCAGGAGGGATAGCGCC	TRINITY_DN49893_c2_g10	PREDICTED: putative kinase-like protein TMKL1 [Gossypium raimondii]	GO:0004672(protein kinase activity);GO:0004674(protein serine/threonine kinase activity);GO:0005524(ATP binding);GO:0005886(plasma membrane);GO:0006468(protein phosphorylation);GO:0007169(transmembrane receptor protein tyrosine kinase signaling pathway);GO:0009506(plasmodesma);GO:0016021(integral component of membrane);GO:0016301(kinase activity)	-	TMKL1	3	290-309	N
miR390b	AGCTCAGGAGGGATAGCGCC	TRINITY_DN50500_c0_g4	PREDICTED: DEAD-box ATP-dependent RNA helicase 21 [Juglans regia]	GO:0000375(RNA splicing, via transesterification reactions);GO:0004004(ATP-dependent RNA helicase activity);GO:0005682(U5 snRNP);GO:0010501(RNA secondary structure unwinding);GO:0071013(catalytic step 2 spliceosome)	ko03040(Spliceosome)	RH21	4	2139-2158	N
miR390b	AGCTCAGGAGGGATAGCGCC	TRINITY_DN54042_c0_g3	PREDICTED: probable LRR receptor-like serine/threonine-protein kinase RFK1 isoform X3 [Juglans regia]	GO:0004674(protein serine/threonine kinase activity);GO:0005886(plasma membrane)	-	RKF1	2	993-1012	N
miR390b	AGCTCAGGAGGGATAGCGCC	TRINITY_DN54185_c1_g4	PREDICTED: receptor-like serine/threonine-protein kinase ALE2 [Juglans regia]	GO:0004672(protein kinase activity);GO:0005524(ATP binding);GO:0005886(plasma membrane);GO:0006468(protein phosphorylation);GO:0016021(integral component of membrane);GO:0016301(kinase activity)	ko04626(Plant-pkogen interaction)	ALE2	4	3154-3173	N
miR391a-5p	CGCAGGAGAGATGGCGCCGT	TRINITY_DN51299_c0_g5	40S ribosomal protein S3a [Morus notabilis]	GO:0005829(cytosol)	ko03010(Ribosome)	-	4	397-415	N
miR393a-3p	ATCATGCTATCCCTTTGGATT	TRINITY_DN49635_c1_g2	PREDICTED: fatty-acid-binding protein 3, chloroplastic isoform X1 [Juglans regia]	GO:0005504(fatty acid binding);GO:0006631(fatty acid metabolic process);GO:0009507(chloroplast);GO:0009570(chloroplast stroma);GO:0009813(flavonoid biosynthetic process);GO:0045430(chalcone isomerase activity)	ko03018(RNA dkoadation)	FAP3	3	182-202	N
miR393b	TCCAAAGGGATCGCATTGATC	TRINITY_DN39256_c0_g2	PREDICTED: protein SCAR2-like [Juglans regia]	-	ko03008(Ribosome biogenesis in eukaryotes)	-	3.5	1-20	N
miR393b	TCCAAAGGGATCGCATTGATC	TRINITY_DN52765_c0_g2	PREDICTED: transcription factor bHLH77-like [Juglans regia]	GO:0005634(nucleus)	ko04141(Protein processing in endoplasmic reticulum)	BHLH62	4	417-437	N
miR394a	TTGGCATTCTGTCCACCTCC	TRINITY_DN29894_c0_g1	-	-	-	-	4	76-96	N
miR394a	TTGGCATTCTGTCCACCTCC	TRINITY_DN38416_c0_g1	40S ribosomal protein S8, partial [Noccaea caerulescens]	GO:0000462(maturation of SSU-rRNA from tricistronic rRNA transcript (SSU-rRNA, 5.8S rRNA, LSU-rRNA));GO:0003735(structural constituent of ribosome);GO:0022627(cytosolic small ribosomal subunit)	ko03010(Ribosome)	RPS8	4	29-47	N
miR394a	TTGGCATTCTGTCCACCTCC	TRINITY_DN50273_c0_g1	PREDICTED: TMV resistance protein N-like isoform X1 [Juglans regia]	GO:0005737(cytoplasm);GO:0006952(defense response);GO:0007165(signal transduction);GO:0016021(integral component of membrane);GO:0043531(ADP binding)	-	-	4	697-716	N
miR394b	TTTGGCATTCTGTCCACCTCC	TRINITY_DN29894_c0_g1	-	-	-	-	4	76-97	N
miR394b	TTTGGCATTCTGTCCACCTCC	TRINITY_DN50273_c0_g1	PREDICTED: TMV resistance protein N-like isoform X1 [Juglans regia]	GO:0005737(cytoplasm);GO:0006952(defense response);GO:0007165(signal transduction);GO:0016021(integral component of membrane);GO:0043531(ADP binding)	-	-	4	697-717	N
miR395a-5p	GTTCCCTTGAACACTTCACT	TRINITY_DN3479_c0_g1	-	-	-	-	4	78-96	N
miR395a-5p	GTTCCCTTGAACACTTCACT	TRINITY_DN40210_c0_g3	hypothetical protein B456_009G275600 [Gossypium raimondii]	-	-	-	3	226-246	N
miR395a-5p	GTTCCCTTGAACACTTCACT	TRINITY_DN49152_c0_g1	PREDICTED: cysteine-rich receptor-like protein kinase 25 [Juglans regia]	GO:0004674(protein serine/threonine kinase activity);GO:0005886(plasma membrane);GO:0006468(protein phosphorylation);GO:0006952(defense response);GO:0009506(plasmodesma)	-	CRK25	4	201-219	N
miR395a-5p	GTTCCCTTGAACACTTCACT	TRINITY_DN52513_c0_g5	PREDICTED: 2-isopropylmalate synthase A-like [Pyrus x bretschneideri]	GO:0003852(2-isopropylmalate synthase activity);GO:0009098(leucine biosynthetic process);GO:0009507(chloroplast);GO:0009570(chloroplast stroma)	ko01210(2-Oxocarboxylic acid metabolism);ko01230(Biosynthesis of amino acids);ko00620(Pyruvate metabolism);ko00290(Valine, leucine and isoleucine biosynthesis)	IPMSA	4	1513-1533	N
miR395a-5p	GTTCCCTTGAACACTTCACT	TRINITY_DN52998_c0_g10	PREDICTED: probable enoyl-CoA hydratase 1, peroxisomal [Juglans regia]	GO:0003824(catalytic activity);GO:0004300(enoyl-CoA hydratase activity);GO:0005739(mitochondrion);GO:0005777(peroxisome);GO:0005829(cytosol);GO:0006635(fatty acid beta-oxidation)	ko04146(Peroxisome)	ECHIA	4	302-320	N
miR395a-5p	GTTCCCTTGAACACTTCACT	TRINITY_DN53115_c0_g2	-	-	-	-	4	104-123	N
miR395a-5p	GTTCCCTTGAACACTTCACT	TRINITY_DN54627_c0_g1	PREDICTED: cysteine-rich receptor-like protein kinase 10 [Juglans regia]	GO:0004674(protein serine/threonine kinase activity);GO:0005524(ATP binding);GO:0005576(extracellular region);GO:0005886(plasma membrane);GO:0006468(protein phosphorylation);GO:0006952(defense response);GO:0009506(plasmodesma);GO:0016021(integral component of membrane);GO:0016301(kinase activity);GO:0016310(phosphorylation)	-	CRK25	4	582-600	N
miR395b	CTGAAGCGTTTGGGGGAACCC	TRINITY_DN43127_c0_g3	PREDICTED: sulfate transporter 2.1 [Juglans regia]	GO:0005887(integral component of plasma membrane);GO:0015116(sulfate transmembrane transporter activity)	-	SULTR2;1	4	72-92	N
miR395b	CTGAAGCGTTTGGGGGAACCC	TRINITY_DN46384_c0_g1	PREDICTED: probable galactinol--sucrose galactosyltransferase 2 [Juglans regia]	GO:0005737(cytoplasm);GO:0006979(response to oxidative stress);GO:0009506(plasmodesma);GO:0016757(transferase activity, transferring glycosyl groups);GO:0034484(raffinose catabolic process);GO:0047274(galactinol-sucrose galactosyltransferase activity);GO:0052692(raffinose alpha-galactosidase activity);GO:0080167(response to karrikin)	ko00052(Galactose metabolism)	RFS2	4	1496-1516	N
miR395c	CTGAAGTGTTTGGAGGAACTC	TRINITY_DN43127_c0_g3	PREDICTED: sulfate transporter 2.1 [Juglans regia]	GO:0005887(integral component of plasma membrane);GO:0015116(sulfate transmembrane transporter activity)	-	SULTR2;1	3.5	72-92	N
miR395c	CTGAAGTGTTTGGAGGAACTC	TRINITY_DN48942_c0_g12	PREDICTED: CDPK-related kinase 5-like [Juglans regia]	GO:0004683(calmodulin-dependent protein kinase activity);GO:0005516(calmodulin binding);GO:0005634(nucleus);GO:0005737(cytoplasm);GO:0005886(plasma membrane);GO:0009738(abscisic acid-activated signaling pathway);GO:0009931(calcium-dependent protein serine/threonine kinase activity);GO:0018105(peptidyl-serine phosphorylation);GO:0035556(intracellular signal transduction);GO:0046777(protein autopho…	ko04626(Plant-pkogen interaction)	CRK5	3.5	288-307	N
miR395c	CTGAAGTGTTTGGAGGAACTC	TRINITY_DN49390_c0_g5	PREDICTED: GDSL esterase/lipase At4g01130 [Juglans regia]	GO:0005576(extracellular region);GO:0016042(lipid catabolic process);GO:0016788(hydrolase activity, acting on ester bonds);GO:0052689(carboxylic ester hydrolase activity)	ko00511(Other glycan dkoadation)	At4g01130	4	522-543	N
miR395c	CTGAAGTGTTTGGAGGAACTC	TRINITY_DN54097_c1_g2	PREDICTED: low affinity sulfate transporter 3 [Vitis vinifera]	GO:0005887(integral component of plasma membrane);GO:0015116(sulfate transmembrane transporter activity)	-	ST3	2.5	33-53	N
miR396a	TTCCACAGCTTTCTTGAACTG	TRINITY_DN37622_c0_g4	-	-	-	-	4	440-459	N
miR396a	TTCCACAGCTTTCTTGAACTG	TRINITY_DN38093_c0_g6	-	-	-	-	3	271-291	N
miR396a	TTCCACAGCTTTCTTGAACTG	TRINITY_DN38119_c0_g7	PREDICTED: uncharacterized protein LOC108993360 [Juglans regia]	GO:0003674(molecular_function);GO:0008150(biological_process);GO:0016021(integral component of membrane)	-	-	4	156-176	N
miR396a	TTCCACAGCTTTCTTGAACTG	TRINITY_DN39157_c0_g4	PREDICTED: growth-regulating factor 4-like [Gossypium arboreum]	GO:0005634(nucleus);GO:0009739(response to gibberellin);GO:0030912(response to deep water)	ko00130(Ubiquinone and other terpenoid-quinone biosynthesis)	GRF3	3	298-319	N
miR396a	TTCCACAGCTTTCTTGAACTG	TRINITY_DN43118_c0_g7	PREDICTED: aldo-keto reductase family 4 member C10-like [Juglans regia]	GO:0005634(nucleus);GO:0005737(cytoplasm);GO:0005829(cytosol);GO:0016491(oxidoreductase activity);GO:0055114(oxidation-reduction process)	ko00040(Pentose and glucuronate interconversions);ko00051(Fructose and mannose metabolism);ko00052(Galactose metabolism);ko00561(Glycerolipid metabolism)	AKR4C10	3.5	1041-1060	N
miR396a	TTCCACAGCTTTCTTGAACTG	TRINITY_DN45552_c0_g2	PREDICTED: growth-regulating factor 3-like isoform X1 [Juglans regia]	GO:0005524(ATP binding);GO:0005634(nucleus);GO:0006351(transcription, DNA-templated);GO:0006355(regulation of transcription, DNA-templated);GO:0008285(negative regulation of cell proliferation);GO:0009624(response to nematode);GO:0044212(transcription regulatory region DNA binding);GO:0048364(root development);GO:0048366(leaf development);GO:0061062(regulation of nematode larval development)	-	GRF3	3	550-571	N
miR396a	TTCCACAGCTTTCTTGAACTG	TRINITY_DN46467_c0_g1	PREDICTED: neutral ceramidase-like [Juglans regia]	GO:0005576(extracellular region);GO:0005623(cell);GO:0005774(vacuolar membrane);GO:0005783(endoplasmic reticulum);GO:0016021(integral component of membrane);GO:0017040(ceramidase activity);GO:0034599(cellular response to oxidative stress);GO:0090156(cellular sphingolipid homeostasis)	ko00600(Sphingolipid metabolism)	At2g38010	4	1793-1813	N
miR396a	TTCCACAGCTTTCTTGAACTG	TRINITY_DN56375_c0_g1	PREDICTED: putative calcium-transporting ATPase 13, plasma membrane-type [Juglans regia]	GO:0005388(calcium-transporting ATPase activity);GO:0005887(integral component of plasma membrane);GO:0043231(intracellular membrane-bounded organelle)	ko00190(Oxidative phosphorylation)	ACA12	3.5	610-630	N
miR396a-3p	TTCAAGAAAGCTGTGGAAAAT	TRINITY_DN38093_c0_g6	-	-	-	-	1	207-227	N
miR396a-3p	TTCAAGAAAGCTGTGGAAAAT	TRINITY_DN38866_c0_g5	PREDICTED: probable inactive ATP-dependent zinc metalloprotease FTSHI 5, chloroplastic [Juglans regia]	GO:0004176(ATP-dependent peptidase activity);GO:0005739(mitochondrion);GO:0006508(proteolysis);GO:0008237(metallopeptidase activity);GO:0009941(chloroplast envelope)	-	FTSHI5	2	485-506	N
miR396a-3p	TTCAAGAAAGCTGTGGAAAAT	TRINITY_DN50444_c0_g3	PREDICTED: probable polyamine transporter At1g31830 isoform X1 [Juglans regia]	GO:0005887(integral component of plasma membrane);GO:0015179(L-amino acid transmembrane transporter activity);GO:0015203(polyamine transmembrane transporter activity);GO:0015297(antiporter activity)	ko03015(mRNA surveillance pkoway)	At1g31830	4	822-843	N
miR396a-3p	TTCAAGAAAGCTGTGGAAAAT	TRINITY_DN50807_c0_g3	PREDICTED: equilibrative nucleotide transporter 3-like [Juglans regia]	GO:0005337(nucleoside transmembrane transporter activity);GO:0005886(plasma membrane);GO:0015858(nucleoside transport);GO:0015864(pyrimidine nucleoside transport);GO:0016021(integral component of membrane)	-	ENT3	3.5	1870-1890	N
miR396a-3p	TTCAAGAAAGCTGTGGAAAAT	TRINITY_DN51840_c0_g7	PREDICTED: protein TPR2-like isoform X1 [Juglans regia]	GO:0005515(protein binding);GO:0005634(nucleus);GO:0005829(cytosol);GO:0006351(transcription, DNA-templated);GO:0006355(regulation of transcription, DNA-templated);GO:0010072(primary shoot apical meristem specification)	ko03008(Ribosome biogenesis in eukaryotes)	TPR2	4	265-284	N
miR396a-3p	TTCAAGAAAGCTGTGGAAAAT	TRINITY_DN52821_c0_g1	hypothetical protein CICLE_v10019427mg [Citrus clementina]	GO:0005576(extracellular region);GO:0016614(oxidoreductase activity, acting on CH-OH group of donors);GO:0016832(aldehyde-lyase activity);GO:0050660(flavin adenine dinucleotide binding);GO:0055114(oxidation-reduction process)	ko00260(Glycine, serine and threonine metabolism)	HTH	4	176-195	N
miR396a-3p	TTCAAGAAAGCTGTGGAAAAT	TRINITY_DN55583_c1_g1	PREDICTED: putative E3 ubiquitin-protein ligase XBAT34 [Juglans regia]	GO:0004842(ubiquitin-protein transferase activity);GO:0005634(nucleus);GO:0005737(cytoplasm);GO:0008270(zinc ion binding);GO:0016567(protein ubiquitination);GO:0016874(ligase activity)	-	XBOS34	4	624-643	N
miR396a-3p	TTCAAGAAAGCTGTGGAAAAT	TRINITY_DN57417_c1_g1	PREDICTED: G-type lectin S-receptor-like serine/threonine-protein kinase LECRK2 isoform X1 [Juglans regia]	GO:0004674(protein serine/threonine kinase activity);GO:0005886(plasma membrane);GO:0006468(protein phosphorylation)	ko00260(Glycine, serine and threonine metabolism);ko00350(Tyrosine metabolism);ko00360(Phenylalanine metabolism);ko00410(beta-Alanine metabolism);ko00950(Isoquinoline alkaloid biosynthesis);ko00960(Tropane, piperidine and pyridine alkaloid biosynthesis)	SD16	3.5	1093-1113	N
miR396b	TTCCACAGCTTTCTTGAACTT	TRINITY_DN34458_c0_g1	-	-	-	-	3.5	121-141	N
miR396b	TTCCACAGCTTTCTTGAACTT	TRINITY_DN37661_c0_g2	Cathepsin L 2 [Noccaea caerulescens]	GO:0004197(cysteine-type endopeptidase activity);GO:0005615(extracellular space);GO:0005764(lysosome);GO:0051603(proteolysis involved in cellular protein catabolic process)	ko04145(Phagosome)	GSPATT00022898001	4	376-396	N
miR396b	TTCCACAGCTTTCTTGAACTT	TRINITY_DN38093_c0_g6	-	-	-	-	2	271-291	N
miR396b	TTCCACAGCTTTCTTGAACTT	TRINITY_DN38765_c0_g1	-	-	-	-	4	114-134	N
miR396b	TTCCACAGCTTTCTTGAACTT	TRINITY_DN39114_c0_g3	PREDICTED: pentatricopeptide repeat-containing protein At5g67570, chloroplastic [Juglans regia]	GO:0009507(chloroplast);GO:0009793(embryo development ending in seed dormancy);GO:0010468(regulation of gene expression)	-	DG1	4	1656-1675	N
miR396b	TTCCACAGCTTTCTTGAACTT	TRINITY_DN39157_c0_g4	PREDICTED: growth-regulating factor 4-like [Gossypium arboreum]	GO:0005634(nucleus);GO:0009739(response to gibberellin);GO:0030912(response to deep water)	ko00130(Ubiquinone and other terpenoid-quinone biosynthesis)	GRF3	4	298-319	N
miR396b	TTCCACAGCTTTCTTGAACTT	TRINITY_DN45552_c0_g2	PREDICTED: growth-regulating factor 3-like isoform X1 [Juglans regia]	GO:0005524(ATP binding);GO:0005634(nucleus);GO:0006351(transcription, DNA-templated);GO:0006355(regulation of transcription, DNA-templated);GO:0008285(negative regulation of cell proliferation);GO:0009624(response to nematode);GO:0044212(transcription regulatory region DNA binding);GO:0048364(root development);GO:0048366(leaf development);GO:0061062(regulation of nematode larval development)	-	GRF3	4	550-571	N
miR396b	TTCCACAGCTTTCTTGAACTT	TRINITY_DN53266_c0_g2	hypothetical protein L484_002543 [Morus notabilis]	GO:0003674(molecular_function);GO:0005634(nucleus);GO:0008150(biological_process)	ko00270(Cysteine and methionine metabolism)	-	4	1029-1049	N
miR396b	TTCCACAGCTTTCTTGAACTT	TRINITY_DN54957_c0_g1	PREDICTED: uncharacterized protein LOC108987137 isoform X1 [Juglans regia]	GO:0003674(molecular_function);GO:0008150(biological_process);GO:0009507(chloroplast)	-	-	4	1918-1937	N
miR396b	TTCCACAGCTTTCTTGAACTT	TRINITY_DN55203_c0_g3	PREDICTED: acyl carrier protein 2, mitochondrial [Vitis vinifera]	GO:0005739(mitochondrion);GO:0005759(mitochondrial matrix);GO:0006633(fatty acid biosynthetic process);GO:0048037(cofactor binding)	ko00190(Oxidative phosphorylation)	SPAC4H3.09	4	259-278	N
miR396b	TTCCACAGCTTTCTTGAACTT	TRINITY_DN56375_c0_g1	PREDICTED: putative calcium-transporting ATPase 13, plasma membrane-type [Juglans regia]	GO:0005388(calcium-transporting ATPase activity);GO:0005887(integral component of plasma membrane);GO:0043231(intracellular membrane-bounded organelle)	ko00190(Oxidative phosphorylation)	ACA12	3	610-630	N
miR396b-3p	CTCAAGAAAGCTGTGGGACA	TRINITY_DN38093_c0_g6	-	-	-	-	2.5	208-227	N
miR396b-3p	CTCAAGAAAGCTGTGGGACA	TRINITY_DN38866_c0_g5	PREDICTED: probable inactive ATP-dependent zinc metalloprotease FTSHI 5, chloroplastic [Juglans regia]	GO:0004176(ATP-dependent peptidase activity);GO:0005739(mitochondrion);GO:0006508(proteolysis);GO:0008237(metallopeptidase activity);GO:0009941(chloroplast envelope)	-	FTSHI5	4	487-506	N
miR396b-3p	CTCAAGAAAGCTGTGGGACA	TRINITY_DN47930_c0_g7	PREDICTED: uncharacterized protein LOC109012285 [Juglans regia]	GO:0003674(molecular_function);GO:0005634(nucleus);GO:0031347(regulation of defense response)	-	-	3.5	1100-1119	N
miR396b-3p	CTCAAGAAAGCTGTGGGACA	TRINITY_DN50300_c1_g4	PREDICTED: transcription elongation factor SPT6 homolog isoform X2 [Juglans regia]	GO:0003677(DNA binding);GO:0003746(translation elongation factor activity);GO:0005634(nucleus);GO:0005829(cytosol);GO:0006139(nucleobase-containing compound metabolic process);GO:0006333(chromatin assembly or disassembly);GO:0006352(DNA-templated transcription, initiation);GO:0006357(regulation of transcription from RNA polymerase II promoter);GO:0006414(translational elongation);GO:0009506(plasm…	-	SPT6	4	55-74	N
miR396b-3p	CTCAAGAAAGCTGTGGGACA	TRINITY_DN51978_c0_g4	PREDICTED: ABC transporter C family member 14 [Juglans regia]	GO:0000325(plant-type vacuole);GO:0005524(ATP binding);GO:0005773(vacuole);GO:0005774(vacuolar membrane);GO:0005794(Golgi apparatus);GO:0005886(plasma membrane);GO:0008559(xenobiotic-transporting ATPase activity);GO:0016021(integral component of membrane);GO:0042626(ATPase activity, coupled to transmembrane movement of substances)	ko02010(ABC transporters)	ABCC14	4	301-321	N
miR396b-3p	CTCAAGAAAGCTGTGGGACA	TRINITY_DN52351_c1_g1	-	-	-	-	4	396-415	N
miR396c-3p	GTTCAATAAAGCTGTGGGAAG	TRINITY_DN38093_c0_g6	-	-	-	-	3	208-228	N
miR396c-3p	GTTCAATAAAGCTGTGGGAAG	TRINITY_DN44502_c0_g1	PREDICTED: equilibrative nucleotide transporter 3-like isoform X1 [Juglans regia]	GO:0005337(nucleoside transmembrane transporter activity);GO:0005886(plasma membrane);GO:0015858(nucleoside transport);GO:0015864(pyrimidine nucleoside transport);GO:0016021(integral component of membrane)	-	ENT3	4	10-29	N
miR396c-3p	GTTCAATAAAGCTGTGGGAAG	TRINITY_DN48262_c0_g1	PREDICTED: uncharacterized protein LOC109004405 isoform X1 [Juglans regia]	GO:0009507(chloroplast);GO:0010027(thylakoid membrane organization);GO:0090391(granum assembly)	-	-	4	731-751	N
miR396d-3p	TCCAAGAAAGCTGTGGGAAA	TRINITY_DN37420_c0_g5	PREDICTED: uncharacterized protein LOC108986177 isoform X1 [Juglans regia]	GO:0005622(intracellular);GO:0006623(protein targeting to vacuole);GO:0019898(extrinsic component of membrane);GO:0045053(protein retention in Golgi apparatus)	-	vps13A	4	438-456	N
miR396d-3p	TCCAAGAAAGCTGTGGGAAA	TRINITY_DN38093_c0_g6	-	-	-	-	2.5	208-227	N
miR396d-3p	TCCAAGAAAGCTGTGGGAAA	TRINITY_DN38866_c0_g5	PREDICTED: probable inactive ATP-dependent zinc metalloprotease FTSHI 5, chloroplastic [Juglans regia]	GO:0004176(ATP-dependent peptidase activity);GO:0005739(mitochondrion);GO:0006508(proteolysis);GO:0008237(metallopeptidase activity);GO:0009941(chloroplast envelope)	-	FTSHI5	4	487-506	N
miR396d-3p	TCCAAGAAAGCTGTGGGAAA	TRINITY_DN39977_c2_g6	PREDICTED: serine/threonine protein phosphatase 2A 59 kDa regulatory subunit B' gamma isoform [Juglans regia]	GO:0000159(protein phosphatase type 2A complex);GO:0005634(nucleus);GO:0005739(mitochondrion);GO:0007165(signal transduction);GO:0008601(protein phosphatase type 2A regulator activity)	ko03015(mRNA surveillance pkoway)	B'ZETA	3	99-117	N
miR396d-3p	TCCAAGAAAGCTGTGGGAAA	TRINITY_DN40977_c0_g2	-	-	-	-	3	338-356	N
miR396d-3p	TCCAAGAAAGCTGTGGGAAA	TRINITY_DN46620_c0_g2	PREDICTED: spermatogenesis-associated protein 20 [Juglans regia]	GO:0003824(catalytic activity);GO:0005576(extracellular region);GO:0009507(chloroplast)	-	SPATA20	4	165-183	N
miR396d-3p	TCCAAGAAAGCTGTGGGAAA	TRINITY_DN49750_c2_g1	PREDICTED: DNA (cytosine-5)-methyltransferase CMT3 isoform X1 [Juglans regia]	GO:0003677(DNA binding);GO:0003682(chromatin binding);GO:0003886(DNA (cytosine-5-)-methyltransferase activity);GO:0005634(nucleus);GO:0006306(DNA methylation);GO:0006342(chromatin silencing);GO:0006351(transcription, DNA-templated);GO:0010069(zygote asymmetric cytokinesis in embryo sac);GO:0010425(DNA methylation on cytosine within a CNG sequence);GO:0045814(negative regulation of gene expression…	ko00270(Cysteine and methionine metabolism)	CMT3	4	1501-1520	N
miR396d-3p	TCCAAGAAAGCTGTGGGAAA	TRINITY_DN53709_c3_g4	-	-	-	-	4	355-373	N
miR396d-3p	TCCAAGAAAGCTGTGGGAAA	TRINITY_DN54558_c0_g11	PREDICTED: uncharacterized protein LOC108981020 [Juglans regia]	GO:0003677(DNA binding);GO:0005634(nucleus);GO:0006355(regulation of transcription, DNA-templated);GO:0008270(zinc ion binding);GO:0016746(transferase activity, transferring acyl groups)	-	IDM1	4	2038-2057	N
miR396d-3p	TCCAAGAAAGCTGTGGGAAA	TRINITY_DN55739_c1_g2	PREDICTED: polyadenylate-binding protein-interacting protein 2-like [Populus euphratica]	GO:0005515(protein binding);GO:0005737(cytoplasm);GO:0009414(response to water deprivation);GO:0009617(response to bacterium);GO:0009644(response to high light intensity)	-	ERD15	4	1067-1086	N
miR396d-3p	TCCAAGAAAGCTGTGGGAAA	TRINITY_DN56215_c1_g1	PREDICTED: probable metal-nicotianamine transporter YSL7 [Juglans regia]	GO:0005886(plasma membrane);GO:0006857(oligopeptide transport);GO:0015198(oligopeptide transporter activity);GO:0016021(integral component of membrane);GO:0055085(transmembrane transport)	ko01200(Carbon metabolism);ko01230(Biosynthesis of amino acids);ko00030(Pentose phosphate pkoway);ko00710(Carbon fixation in photosynthetic organisms)	YSL7	3.5	574-594	N
miR396d-3p	TCCAAGAAAGCTGTGGGAAA	TRINITY_DN56293_c0_g7	PREDICTED: auxilin-like protein 1 [Juglans regia]	GO:0006457(protein folding);GO:0009507(chloroplast)	-	AUL1	3.5	55-73	N
miR396d-3p	TCCAAGAAAGCTGTGGGAAA	TRINITY_DN57017_c0_g7	-	-	-	-	3.5	146-165	N
miR397a	TCATTGAGTGCAGCGTTGATG	TRINITY_DN35687_c0_g1	-	-	-	-	3	131-151	N
miR397a	TCATTGAGTGCAGCGTTGATG	TRINITY_DN40243_c0_g1	PREDICTED: uncharacterized protein LOC108997226 [Juglans regia]	GO:0003674(molecular_function);GO:0005576(extracellular region);GO:0008150(biological_process);GO:0016021(integral component of membrane)	-	-	4	450-470	N
miR397a	TCATTGAGTGCAGCGTTGATG	TRINITY_DN43581_c0_g4	PREDICTED: laccase-7 [Vitis vinifera]	GO:0005507(copper ion binding);GO:0016722(oxidoreductase activity, oxidizing metal ions)	ko00053(Ascorbate and aldarate metabolism)	LAC7	3	683-703	N
miR397a	TCATTGAGTGCAGCGTTGATG	TRINITY_DN45346_c0_g5	PREDICTED: lysophospholipid acyltransferase LPEAT1-like isoform X2 [Juglans regia]	GO:0005634(nucleus);GO:0005783(endoplasmic reticulum);GO:0005789(endoplasmic reticulum membrane);GO:0006644(phospholipid metabolic process);GO:0008654(phospholipid biosynthetic process);GO:0016021(integral component of membrane);GO:0016746(transferase activity, transferring acyl groups);GO:0050200(plasmalogen synthase activity)	ko00564(Glycerophospholipid metabolism);ko00565(Ether lipid metabolism)	LPEAT1	4	805-824	N
miR397a	TCATTGAGTGCAGCGTTGATG	TRINITY_DN51185_c0_g1	PREDICTED: laccase-2-like [Juglans regia]	GO:0005507(copper ion binding);GO:0009809(lignin biosynthetic process);GO:0016722(oxidoreductase activity, oxidizing metal ions)	ko00053(Ascorbate and aldarate metabolism)	LAC2	1	769-789	N
miR397a-3p	TTAGCGCTGCACTCAATCATG	TRINITY_DN35454_c0_g1	PREDICTED: 21 kDa protein [Juglans regia]	GO:0004857(enzyme inhibitor activity)	ko00040(Pentose and glucuronate interconversions);ko00500(Starch and sucrose metabolism)	-	3.5	548-568	N
miR397a-3p	TTAGCGCTGCACTCAATCATG	TRINITY_DN35687_c0_g1	-	-	-	-	3	64-84	N
miR397a-3p	TTAGCGCTGCACTCAATCATG	TRINITY_DN53020_c0_g4	PREDICTED: uncharacterized protein LOC109000898 [Juglans regia]	GO:0005622(intracellular);GO:0006623(protein targeting to vacuole);GO:0019898(extrinsic component of membrane);GO:0045053(protein retention in Golgi apparatus)	-	tipC	4	2478-2498	N
miR397b	TCATTGAGTGCAGCGTTGATG	TRINITY_DN35687_c0_g1	-	-	-	-	3	131-151	N
miR397b	TCATTGAGTGCAGCGTTGATG	TRINITY_DN40243_c0_g1	PREDICTED: uncharacterized protein LOC108997226 [Juglans regia]	GO:0003674(molecular_function);GO:0005576(extracellular region);GO:0008150(biological_process);GO:0016021(integral component of membrane)	-	-	4	450-470	N
miR397b	TCATTGAGTGCAGCGTTGATG	TRINITY_DN43581_c0_g4	PREDICTED: laccase-7 [Vitis vinifera]	GO:0005507(copper ion binding);GO:0016722(oxidoreductase activity, oxidizing metal ions)	ko00053(Ascorbate and aldarate metabolism)	LAC7	3	683-703	N
miR397b	TCATTGAGTGCAGCGTTGATG	TRINITY_DN45346_c0_g5	PREDICTED: lysophospholipid acyltransferase LPEAT1-like isoform X2 [Juglans regia]	GO:0005634(nucleus);GO:0005783(endoplasmic reticulum);GO:0005789(endoplasmic reticulum membrane);GO:0006644(phospholipid metabolic process);GO:0008654(phospholipid biosynthetic process);GO:0016021(integral component of membrane);GO:0016746(transferase activity, transferring acyl groups);GO:0050200(plasmalogen synthase activity)	ko00564(Glycerophospholipid metabolism);ko00565(Ether lipid metabolism)	LPEAT1	4	805-824	N
miR397b	TCATTGAGTGCAGCGTTGATG	TRINITY_DN51185_c0_g1	PREDICTED: laccase-2-like [Juglans regia]	GO:0005507(copper ion binding);GO:0009809(lignin biosynthetic process);GO:0016722(oxidoreductase activity, oxidizing metal ions)	ko00053(Ascorbate and aldarate metabolism)	LAC2	1	769-789	N
miR397c	TCATTGAGTTCAGCGTTGATG	TRINITY_DN41331_c3_g1	predicted protein [Hordeum vulgare subsp. vulgare]	GO:0003684(damaged DNA binding);GO:0003729(mRNA binding);GO:0003735(structural constituent of ribosome);GO:0005634(nucleus);GO:0005730(nucleolus);GO:0005743(mitochondrial inner membrane);GO:0005759(mitochondrial matrix);GO:0005844(polysome);GO:0005925(focal adhesion);GO:0006281(DNA repair);GO:0006351(transcription, DNA-templated);GO:0006412(translation);GO:0007059(chromosome segregation);GO:00070…	ko03010(Ribosome)	rps3-a	3.5	77-97	N
miR397c	TCATTGAGTTCAGCGTTGATG	TRINITY_DN44275_c0_g1	PREDICTED: protein FAR1-RELATED SEQUENCE 3-like [Juglans regia]	GO:0005634(nucleus);GO:0006355(regulation of transcription, DNA-templated);GO:0008270(zinc ion binding);GO:0009506(plasmodesma);GO:0009639(response to red or far red light)	-	FRS3	3.5	263-283	N
miR397c	TCATTGAGTTCAGCGTTGATG	TRINITY_DN51185_c0_g1	PREDICTED: laccase-2-like [Juglans regia]	GO:0005507(copper ion binding);GO:0009809(lignin biosynthetic process);GO:0016722(oxidoreductase activity, oxidizing metal ions)	ko00053(Ascorbate and aldarate metabolism)	LAC2	3	769-789	N
miR397c	TCATTGAGTTCAGCGTTGATG	TRINITY_DN52281_c0_g4	PREDICTED: aluminum-activated malate transporter 8-like isoform X1 [Juglans regia]	GO:0009705(plant-type vacuole membrane);GO:0015140(malate transmembrane transporter activity)	-	ALMT14	4	1142-1162	N
miR397c	TCATTGAGTTCAGCGTTGATG	TRINITY_DN53067_c0_g4	PREDICTED: pyruvate, phosphate dikinase, chloroplastic [Juglans regia]	GO:0005524(ATP binding);GO:0005634(nucleus);GO:0005829(cytosol);GO:0006090(pyruvate metabolic process);GO:0009507(chloroplast);GO:0009570(chloroplast stroma);GO:0015979(photosynthesis);GO:0016301(kinase activity);GO:0016310(phosphorylation);GO:0046872(metal ion binding);GO:0050242(pyruvate, phosphate dikinase activity)	ko01200(Carbon metabolism);ko00620(Pyruvate metabolism);ko00710(Carbon fixation in photosynthetic organisms)	PPD	4	267-287	N
miR397d-3p	TCACCGGCGCTGCACTCAATT	TRINITY_DN37054_c0_g2	PREDICTED: galacturonosyltransferase 8-like [Juglans regia]	GO:0000139(Golgi membrane);GO:0005739(mitochondrion);GO:0005768(endosome);GO:0005794(Golgi apparatus);GO:0005802(trans-Golgi network);GO:0007155(cell adhesion);GO:0010289(homogalacturonan biosynthetic process);GO:0016021(integral component of membrane);GO:0016051(carbohydrate biosynthetic process);GO:0016757(transferase activity, transferring glycosyl groups);GO:0016758(transferase activity, tran…	ko00500(Starch and sucrose metabolism);ko00520(Amino sugar and nucleotide sugar metabolism)	GAUT8	3.5	96-117	N
miR397d-3p	TCACCGGCGCTGCACTCAATT	TRINITY_DN58972_c0_g1	-	-	-	-	4	113-132	N
miR399a	TGCCAAAGGAGAATTGCCCTG	TRINITY_DN49742_c0_g1	PREDICTED: urea-proton symporter DUR3 isoform X1 [Juglans regia]	GO:0005887(integral component of plasma membrane);GO:0015204(urea transmembrane transporter activity);GO:0015293(symporter activity)	-	DUR3	4	1091-1110	N
miR399a-5p	GTGCAGTCCTCCTTTGGCAGA	TRINITY_DN41589_c0_g1	PREDICTED: stress enhanced protein 1, chloroplastic-like [Juglans regia]	GO:0009523(photosystem II);GO:0009535(chloroplast thylakoid membrane);GO:0009611(response to wounding);GO:0009644(response to high light intensity);GO:0015979(photosynthesis);GO:0016021(integral component of membrane);GO:0016168(chlorophyll binding);GO:0071486(cellular response to high light intensity);GO:0071492(cellular response to UV-A)	-	1-Sep	3.5	225-245	N
miR399b	TCTGCCAAAGGAGATTTGCCCTG	TRINITY_DN38037_c0_g7	PREDICTED: probable ubiquitin-conjugating enzyme E2 24 [Juglans regia]	GO:0005737(cytoplasm);GO:0031625(ubiquitin protein ligase binding);GO:0061630(ubiquitin protein ligase activity)	ko04120(Ubiquitin mediated proteolysis)	UBC24	3	708-730	N
miR403a	TTAGATTCACGCACAAACTT	TRINITY_DN36813_c0_g6	-	-	-	-	4	486-505	N
miR403a	TTAGATTCACGCACAAACTT	TRINITY_DN39613_c0_g5	hypothetical protein MANES_01G024400 [Manihot esculenta]	GO:0005634(nucleus)	-	TSNAX	3.5	638-658	N
miR403a	TTAGATTCACGCACAAACTT	TRINITY_DN41054_c1_g9	-	-	-	-	4	31-49	N
miR403a	TTAGATTCACGCACAAACTT	TRINITY_DN48514_c1_g2	-	-	-	-	4	763-782	N
miR403c	TTAGATTCACGCACAAACTTTT	TRINITY_DN36813_c0_g6	-	-	-	-	4	484-505	N
miR403d-5p	CGTTTGTGCGTGAATCTGACA	TRINITY_DN47161_c0_g4	PREDICTED: protein ENHANCED DISEASE RESISTANCE 4-like [Juglans regia]	GO:0003674(molecular_function);GO:0005634(nucleus);GO:0005886(plasma membrane);GO:0008150(biological_process)	-	-	4	1711-1730	N
miR408a-3p	ATGCACTGCCTCTTCCCTGGC	TRINITY_DN37015_c0_g9	PREDICTED: laccase-13-like [Juglans regia]	GO:0005507(copper ion binding);GO:0016722(oxidoreductase activity, oxidizing metal ions)	ko00053(Ascorbate and aldarate metabolism)	LAC3	4	148-168	N
miR408a-3p	ATGCACTGCCTCTTCCCTGGC	TRINITY_DN57049_c0_g5	-	-	-	-	4	511-530	N
miR477a-3p	TGAGGCCTTTGGGGAGAGTGG	TRINITY_DN35763_c0_g4	PREDICTED: uncharacterized protein LOC108996383 [Juglans regia]	GO:0003674(molecular_function);GO:0005739(mitochondrion);GO:0008150(biological_process)	-	-	3	719-739	N
miR477a-3p	TGAGGCCTTTGGGGAGAGTGG	TRINITY_DN41678_c0_g2	PREDICTED: cell division control protein 2 homolog isoform X1 [Vitis vinifera]	GO:0000911(cytokinesis by cell plate formation);GO:0004672(protein kinase activity);GO:0004693(cyclin-dependent protein serine/threonine kinase activity);GO:0005515(protein binding);GO:0005524(ATP binding);GO:0005634(nucleus);GO:0005737(cytoplasm);GO:0005829(cytosol);GO:0005886(plasma membrane);GO:0006468(protein phosphorylation);GO:0007067(mitotic nuclear division);GO:0008284(positive regulation…	ko03022(Basal transcription factors);ko03420(Nucleotide excision repair)	CDC2	4	958-979	N
miR477a-3p	TGAGGCCTTTGGGGAGAGTGG	TRINITY_DN54944_c0_g1	-	-	-	-	4	82-101	N
miR477a-3p	TGAGGCCTTTGGGGAGAGTGG	TRINITY_DN55349_c0_g2	PREDICTED: TOM1-like protein 2 [Juglans regia]	GO:0005622(intracellular);GO:0005634(nucleus);GO:0005795(Golgi stack);GO:0005886(plasma membrane);GO:0006886(intracellular protein transport);GO:0006891(intra-Golgi vesicle-mediated transport);GO:0008565(protein transporter activity)	-	-	3.5	772-792	N
miR482a	TCTTTCCTAGTCCACCCATTCC	TRINITY_DN44061_c0_g3	-	-	-	-	3.5	269-289	N
miR482a	TCTTTCCTAGTCCACCCATTCC	TRINITY_DN48483_c0_g2	-	-	-	-	3.5	63-83	N
miR482a	TCTTTCCTAGTCCACCCATTCC	TRINITY_DN53044_c1_g1	Rhizopine catabolism protein mocA [Morus notabilis]	GO:0016491(oxidoreductase activity);GO:0055114(oxidation-reduction process)	-	iolG	3	236-256	N
miR482a	TCTTTCCTAGTCCACCCATTCC	TRINITY_DN53856_c0_g3	PREDICTED: putative disease resistance protein RGA3, partial [Juglans regia]	GO:0005515(protein binding);GO:0005524(ATP binding);GO:0005576(extracellular region);GO:0006952(defense response);GO:0043531(ADP binding)	ko03040(Spliceosome)	RGA2	4	595-616	N
miR482a	TCTTTCCTAGTCCACCCATTCC	TRINITY_DN54163_c0_g1	PREDICTED: putative disease resistance protein RGA3 [Gossypium hirsutum]	-	ko04626(Plant-pkogen interaction)	RGA3	3	1156-1177	N
miR482a	TCTTTCCTAGTCCACCCATTCC	TRINITY_DN55570_c0_g2	PREDICTED: putative disease resistance protein RGA3 [Juglans regia]	GO:0005515(protein binding);GO:0005524(ATP binding);GO:0005576(extracellular region);GO:0006952(defense response);GO:0043531(ADP binding)	ko01230(Biosynthesis of amino acids);ko00400(Phenylalanine, tyrosine and tryptophan biosynthesis)	RGA3	4	27-48	N
miR482a	TCTTTCCTAGTCCACCCATTCC	TRINITY_DN56159_c0_g2	PREDICTED: putative disease resistance protein RGA1 [Theobroma cacao]	GO:0005515(protein binding);GO:0005524(ATP binding);GO:0005576(extracellular region);GO:0006952(defense response);GO:0043531(ADP binding)	ko03040(Spliceosome)	RGA4	3.5	295-316	N
miR482a	TCTTTCCTAGTCCACCCATTCC	TRINITY_DN56361_c0_g1	PREDICTED: putative disease resistance protein RGA3 [Juglans regia]	GO:0005524(ATP binding);GO:0005575(cellular_component);GO:0006952(defense response);GO:0043531(ADP binding)	ko03040(Spliceosome)	RGA2	3	598-619	N
miR482a	TCTTTCCTAGTCCACCCATTCC	TRINITY_DN56361_c0_g3	PREDICTED: disease resistance protein RGA2-like isoform X1 [Juglans regia]	-	-	RGA3	4	306-327	N
miR482c	TCTTGCCTACACCGCCCATGCC	TRINITY_DN13645_c0_g1	ATPase GET3 [Anthurium amnicola]	GO:0000166(nucleotide binding);GO:0005524(ATP binding);GO:0005634(nucleus);GO:0005829(cytosol);GO:0008150(biological_process);GO:0016887(ATPase activity);GO:0017111(nucleoside-triphosphatase activity)	-	GET3	3	126-147	N
miR482c	TCTTGCCTACACCGCCCATGCC	TRINITY_DN36825_c0_g3	PREDICTED: GTP-binding nuclear protein Ran [Pyrus x bretschneideri]	GO:0000054(ribosomal subunit export from nucleus);GO:0003924(GTPase activity);GO:0005634(nucleus);GO:0005737(cytoplasm);GO:0006606(protein import into nucleus)	ko03013(RNA transport);ko03008(Ribosome biogenesis in eukaryotes)	Bm1_44725	3	95-116	N
miR482c	TCTTGCCTACACCGCCCATGCC	TRINITY_DN46008_c0_g4	P-loop containing nucleoside triphosphate hydrolases superfamily protein isoform 1 [Theobroma cacao]	GO:0005515(protein binding);GO:0005524(ATP binding);GO:0005783(endoplasmic reticulum);GO:0006810(transport);GO:0006820(anion transport);GO:0009507(chloroplast);GO:0016020(membrane);GO:0016887(ATPase activity);GO:0045048(protein insertion into ER membrane);GO:0046872(metal ion binding)	-	AAEL011136	3.5	219-240	N
miR482e-3p	CGAGACCTCCCATTCCAA	TRINITY_DN35958_c1_g2	-	-	-	-	3	348-365	N
miR482e-3p	CGAGACCTCCCATTCCAA	TRINITY_DN36103_c2_g2	PREDICTED: uncharacterized protein OsI_027940-like [Sesamum indicum]	GO:0005634(nucleus);GO:0005829(cytosol);GO:0006457(protein folding);GO:0032212(positive regulation of telomere maintenance via telomerase);GO:0043392(negative regulation of DNA binding);GO:0051087(chaperone binding);GO:0051972(regulation of telomerase activity)	ko00590(Arachidonic acid metabolism)	-	4	420-437	N
miR482e-3p	CGAGACCTCCCATTCCAA	TRINITY_DN36543_c1_g6	-	-	-	-	4	190-208	N
miR482e-3p	CGAGACCTCCCATTCCAA	TRINITY_DN39805_c0_g1	PREDICTED: putative disease resistance protein RGA3 [Theobroma cacao]	GO:0005515(protein binding);GO:0005524(ATP binding);GO:0005576(extracellular region);GO:0006952(defense response);GO:0043531(ADP binding)	ko03040(Spliceosome)	RGA3	4	59-76	N
miR482e-3p	CGAGACCTCCCATTCCAA	TRINITY_DN40468_c0_g8	PREDICTED: glutamic acid-rich protein [Juglans regia]	GO:0003735(structural constituent of ribosome);GO:0070181(small ribosomal subunit rRNA binding)	-	-	4	339-356	N
miR482e-3p	CGAGACCTCCCATTCCAA	TRINITY_DN40773_c0_g5	-	-	-	-	4	110-127	N
miR482e-3p	CGAGACCTCCCATTCCAA	TRINITY_DN42759_c0_g3	PREDICTED: probable xyloglucan endotransglucosylase/hydrolase protein 26 [Vitis vinifera]	GO:0004553(hydrolase activity, hydrolyzing O-glycosyl compounds);GO:0005576(extracellular region);GO:0005618(cell wall);GO:0010411(xyloglucan metabolic process);GO:0016762(xyloglucan:xyloglucosyl transferase activity);GO:0016798(hydrolase activity, acting on glycosyl bonds);GO:0042546(cell wall biogenesis);GO:0048046(apoplast);GO:0071555(cell wall organization)	ko04075(Plant hormone signal transduction)	XTH26	4	20-38	N
miR482e-3p	CGAGACCTCCCATTCCAA	TRINITY_DN44326_c0_g2	PREDICTED: uncharacterized protein LOC109018256 [Juglans regia]	GO:0003735(structural constituent of ribosome);GO:0004812(aminoacyl-tRNA ligase activity);GO:0005739(mitochondrion);GO:0005840(ribosome);GO:0006412(translation);GO:0008097(5S rRNA binding)	ko03010(Ribosome)	rplY	4	685-703	N
miR482e-3p	CGAGACCTCCCATTCCAA	TRINITY_DN45536_c0_g1	PREDICTED: uncharacterized protein LOC108990561 [Juglans regia]	GO:0005634(nucleus);GO:0006396(RNA processing)	-	-	4	627-644	N
miR482e-3p	CGAGACCTCCCATTCCAA	TRINITY_DN46703_c0_g2	-	-	-	-	4	138-154	N
miR482e-3p	CGAGACCTCCCATTCCAA	TRINITY_DN50797_c0_g7	PREDICTED: protein SMAX1-LIKE 6-like [Juglans regia]	GO:0005634(nucleus);GO:0005737(cytoplasm);GO:0006351(transcription, DNA-templated);GO:0006355(regulation of transcription, DNA-templated);GO:0019538(protein metabolic process)	-	SMXL7	4	798-814	N
miR482e-3p	CGAGACCTCCCATTCCAA	TRINITY_DN51206_c0_g6	PREDICTED: uncharacterized protein LOC109010034 [Juglans regia]	GO:0016020(membrane);GO:0046873(metal ion transmembrane transporter activity);GO:0098655(cation transmembrane transport)	-	-	4	20-37	N
miR482e-3p	CGAGACCTCCCATTCCAA	TRINITY_DN53560_c0_g1	PREDICTED: auxin response factor 3-like [Juglans regia]	GO:0003677(DNA binding);GO:0003700(transcription factor activity, sequence-specific DNA binding);GO:0005634(nucleus);GO:0006351(transcription, DNA-templated);GO:0006355(regulation of transcription, DNA-templated);GO:0009733(response to auxin);GO:0009734(auxin-activated signaling pathway);GO:0009850(auxin metabolic process);GO:0010050(vegetative phase change);GO:0010158(abaxial cell fate specifica…	ko04075(Plant hormone signal transduction)	ARF3	3	1170-1186	N
miR482e-3p	CGAGACCTCCCATTCCAA	TRINITY_DN62159_c0_g1	hypothetical protein CHLNCDRAFT_145496 [Chlorella variabilis]	GO:0005737(cytoplasm);GO:0008270(zinc ion binding);GO:0009617(response to bacterium);GO:0009809(lignin biosynthetic process);GO:0045551(cinnamyl-alcohol dehydrogenase activity);GO:0046029(mannitol dehydrogenase activity);GO:0047681(aryl-alcohol dehydrogenase (NADP+) activity);GO:0052747(sinapyl alcohol dehydrogenase activity);GO:0055114(oxidation-reduction process)	ko00940(Phenylpropanoid biosynthesis)	10HGO	4	548-565	N
miR482g-3p	AAAATTACAAATTCAAGTCCT	TRINITY_DN36023_c0_g1	Eukaryotic aspartyl protease family protein [Theobroma cacao]	GO:0004190(aspartic-type endopeptidase activity);GO:0006508(proteolysis);GO:0030163(protein catabolic process)	-	nep1	4	1529-1548	N
miR482g-3p	AAAATTACAAATTCAAGTCCT	TRINITY_DN37781_c0_g6	PREDICTED: glycine-rich RNA-binding protein 4, mitochondrial [Juglans regia]	GO:0000166(nucleotide binding);GO:0003676(nucleic acid binding);GO:0003723(RNA binding);GO:0005634(nucleus);GO:0008150(biological_process)	ko03040(Spliceosome)	RBG4	4	216-237	N
miR482g-3p	AAAATTACAAATTCAAGTCCT	TRINITY_DN39326_c0_g4	-	-	-	-	4	460-479	N
miR482g-3p	AAAATTACAAATTCAAGTCCT	TRINITY_DN42542_c0_g3	PREDICTED: somatic embryogenesis receptor kinase 1-like [Nicotiana attenuata]	GO:0004674(protein serine/threonine kinase activity);GO:0005524(ATP binding);GO:0005886(plasma membrane);GO:0006468(protein phosphorylation);GO:0008289(lipid binding);GO:0009556(microsporogenesis);GO:0009742(brassinosteroid mediated signaling pathway);GO:0010152(pollen maturation);GO:0016021(integral component of membrane);GO:0016301(kinase activity);GO:0019199(transmembrane receptor protein kina…	ko04075(Plant hormone signal transduction);ko04626(Plant-pkogen interaction)	SERK1	4	594-613	N
miR482g-3p	AAAATTACAAATTCAAGTCCT	TRINITY_DN42573_c0_g2	-	-	-	-	4	145-164	N
miR482g-3p	AAAATTACAAATTCAAGTCCT	TRINITY_DN44159_c0_g4	-	-	-	-	3.5	66-85	N
miR482g-3p	AAAATTACAAATTCAAGTCCT	TRINITY_DN51621_c0_g2	-	-	-	-	4	209-228	N
miR482g-3p	AAAATTACAAATTCAAGTCCT	TRINITY_DN52073_c0_g1	PREDICTED: SUPPRESSOR OF ABI3-5 isoform X4 [Juglans regia]	GO:0000166(nucleotide binding);GO:0000245(spliceosomal complex assembly);GO:0000381(regulation of alternative mRNA splicing, via spliceosome);GO:0003729(mRNA binding);GO:0005654(nucleoplasm);GO:0005681(spliceosomal complex);GO:0008270(zinc ion binding);GO:0043065(positive regulation of apoptotic process)	ko03040(Spliceosome)	SUA	4	1574-1595	N
miR482g-3p	AAAATTACAAATTCAAGTCCT	TRINITY_DN53604_c0_g1	-	-	-	-	4	260-280	N
miR482g-3p	AAAATTACAAATTCAAGTCCT	TRINITY_DN53692_c0_g5	PREDICTED: zinc finger CCCH domain-containing protein 14-like [Juglans regia]	GO:0003676(nucleic acid binding);GO:0003677(DNA binding);GO:0003700(transcription factor activity, sequence-specific DNA binding);GO:0003723(RNA binding);GO:0005737(cytoplasm);GO:0006355(regulation of transcription, DNA-templated);GO:0046872(metal ion binding)	ko00040(Pentose and glucuronate interconversions);ko00052(Galactose metabolism);ko00500(Starch and sucrose metabolism);ko00520(Amino sugar and nucleotide sugar metabolism)	Os02g0194200	4	1069-1088	N
miR5072a	TCCCCAGCAGAGTCGCCA	TRINITY_DN34166_c0_g1	-	-	-	-	4	409-426	N
miR5072a	TCCCCAGCAGAGTCGCCA	TRINITY_DN40028_c0_g4	PREDICTED: subtilisin-like protease SBT1.3 [Juglans regia]	GO:0004252(serine-type endopeptidase activity);GO:0005618(cell wall)	ko04144(Endocytosis)	SBT1.3	3.5	1586-1602	N
miR5072a	TCCCCAGCAGAGTCGCCA	TRINITY_DN42362_c0_g3	PREDICTED: putative E3 ubiquitin-protein ligase XBAT31 isoform X1 [Juglans regia]	GO:0005737(cytoplasm);GO:0008270(zinc ion binding);GO:0016021(integral component of membrane);GO:0016567(protein ubiquitination);GO:0016874(ligase activity)	-	XBAT31	4	166-183	N
miR5072a	TCCCCAGCAGAGTCGCCA	TRINITY_DN42372_c0_g2	-	-	-	-	4	136-154	N
miR5072a	TCCCCAGCAGAGTCGCCA	TRINITY_DN44995_c0_g7	hypothetical protein PRUPE_ppa010490mg [Prunus persica]	GO:0003674(molecular_function);GO:0005737(cytoplasm);GO:0008150(biological_process)	-	-	4	319-336	N
miR5072a	TCCCCAGCAGAGTCGCCA	TRINITY_DN45748_c0_g4	PREDICTED: serine/threonine-protein kinase SRK2A [Juglans regia]	GO:0004674(protein serine/threonine kinase activity);GO:0005634(nucleus);GO:0005737(cytoplasm);GO:0006468(protein phosphorylation);GO:0035556(intracellular signal transduction)	ko04075(Plant hormone signal transduction)	SRK2A	4	1214-1232	N
miR5072a	TCCCCAGCAGAGTCGCCA	TRINITY_DN47834_c0_g2	PREDICTED: pectin acetylesterase 12-like isoform X1 [Juglans regia]	GO:0005576(extracellular region);GO:0005618(cell wall);GO:0016787(hydrolase activity);GO:0052689(carboxylic ester hydrolase activity);GO:0071555(cell wall organization)	ko00600(Sphingolipid metabolism)	PAE12	3.5	546-563	N
miR5072a	TCCCCAGCAGAGTCGCCA	TRINITY_DN49158_c0_g3	PREDICTED: protein FAR1-RELATED SEQUENCE 12-like isoform X1 [Juglans regia]	GO:0005634(nucleus);GO:0006355(regulation of transcription, DNA-templated);GO:0009639(response to red or far red light)	-	FRS3	4	113-130	N
miR5072a	TCCCCAGCAGAGTCGCCA	TRINITY_DN49352_c0_g3	PREDICTED: DNA gyrase subunit A, chloroplastic/mitochondrial isoform X1 [Juglans regia]	GO:0003918(DNA topoisomerase type II (ATP-hydrolyzing) activity);GO:0006265(DNA topological change);GO:0006268(DNA unwinding involved in DNA replication);GO:0007059(chromosome segregation);GO:0009295(nucleoid);GO:0009330(DNA topoisomerase complex (ATP-hydrolyzing))	-	GYRA	3.5	2186-2204	N
miR5072a	TCCCCAGCAGAGTCGCCA	TRINITY_DN49931_c0_g3	PREDICTED: WAT1-related protein At2g37460-like isoform X1 [Juglans regia]	GO:0005886(plasma membrane);GO:0006810(transport);GO:0022857(transmembrane transporter activity)	ko01200(Carbon metabolism);ko01230(Biosynthesis of amino acids);ko00010(Glycolysis / Gluconeogenesis);ko00030(Pentose phosphate pkoway);ko00051(Fructose and mannose metabolism);ko00710(Carbon fixation in photosynthetic organisms)	At2g37460	3	1188-1205	N
miR5072a	TCCCCAGCAGAGTCGCCA	TRINITY_DN50066_c0_g2	PREDICTED: uncharacterized protein LOC109010309 [Juglans regia]	GO:0004177(aminopeptidase activity);GO:0005576(extracellular region);GO:0005829(cytosol);GO:0006508(proteolysis);GO:0008236(serine-type peptidase activity);GO:0009507(chloroplast)	-	dpf-6	3.5	1716-1734	N
miR5072a	TCCCCAGCAGAGTCGCCA	TRINITY_DN50081_c0_g8	PREDICTED: NADH dehydrogenase [ubiquinone] complex I, assembly factor 7 [Juglans regia]	GO:0005739(mitochondrion);GO:0008150(biological_process);GO:0008270(zinc ion binding)	-	midA	4	1210-1226	N
miR5072a	TCCCCAGCAGAGTCGCCA	TRINITY_DN50269_c0_g3	PREDICTED: UPF0481 protein At3g47200-like [Prunus mume]	GO:0003674(molecular_function);GO:0005886(plasma membrane);GO:0008150(biological_process);GO:0016021(integral component of membrane)	-	At3g47200	4	1564-1581	N
miR5072a	TCCCCAGCAGAGTCGCCA	TRINITY_DN50626_c0_g2	PREDICTED: NEDD8-activating enzyme E1 regulatory subunit AXR1-like [Juglans regia]	GO:0005634(nucleus);GO:0005829(cytosol);GO:0019781(NEDD8 activating enzyme activity);GO:0045116(protein neddylation)	ko04120(Ubiquitin mediated proteolysis)	AXR1	3.5	638-655	N
miR5072a	TCCCCAGCAGAGTCGCCA	TRINITY_DN50633_c0_g8	-	-	-	-	4	468-485	N
miR5072a	TCCCCAGCAGAGTCGCCA	TRINITY_DN51109_c0_g1	PREDICTED: uncharacterized protein LOC109002223 [Juglans regia]	GO:0003735(structural constituent of ribosome);GO:0006412(translation);GO:0022627(cytosolic small ribosomal subunit)	ko03010(Ribosome)	-	4	217-234	N
miR5072a	TCCCCAGCAGAGTCGCCA	TRINITY_DN53912_c0_g2	PREDICTED: putative nuclease HARBI1 isoform X1 [Juglans regia]	GO:0003682(chromatin binding);GO:0005515(protein binding);GO:0005634(nucleus);GO:0031936(negative regulation of chromatin silencing)	-	ALP1	3.5	2195-2211	N
miR5072a	TCCCCAGCAGAGTCGCCA	TRINITY_DN54071_c0_g1	PREDICTED: probable aquaporin SIP2-1 [Juglans regia]	GO:0005887(integral component of plasma membrane);GO:0009992(cellular water homeostasis);GO:0015250(water channel activity);GO:0015254(glycerol channel activity);GO:0034220(ion transmembrane transport)	-	SIP2-1	3.5	827-844	N
miR5268a-5p	TAACAAAGTCTGAATGGT	TRINITY_DN13342_c0_g1	-	-	-	-	3.5	179-196	N
miR5268a-5p	TAACAAAGTCTGAATGGT	TRINITY_DN37429_c2_g7	-	-	-	-	4	265-282	N
miR5268a-5p	TAACAAAGTCTGAATGGT	TRINITY_DN37772_c0_g6	Cathepsin L 2 [Noccaea caerulescens]	GO:0004197(cysteine-type endopeptidase activity);GO:0005615(extracellular space);GO:0005764(lysosome);GO:0051603(proteolysis involved in cellular protein catabolic process)	ko04145(Phagosome)	GSPATT00022898001	3	155-171	N
miR5268a-5p	TAACAAAGTCTGAATGGT	TRINITY_DN39460_c0_g6	PREDICTED: non-structural maintenance of chromosomes element 4 homolog A-like [Juglans regia]	GO:0003674(molecular_function);GO:0005634(nucleus);GO:0006281(DNA repair);GO:0006310(DNA recombination);GO:0030915(Smc5-Smc6 complex)	-	NSE4A	4	374-390	N
miR5268a-5p	TAACAAAGTCTGAATGGT	TRINITY_DN39467_c1_g5	PREDICTED: phosphoinositide phosphatase SAC2-like isoform X1 [Juglans regia]	GO:0004439(phosphatidylinositol-4,5-bisphosphate 5-phosphatase activity);GO:0005634(nucleus);GO:0005774(vacuolar membrane);GO:0007033(vacuole organization);GO:0036092(phosphatidylinositol-3-phosphate biosynthetic process);GO:0042578(phosphoric ester hydrolase activity)	ko03010(Ribosome)	SAC2	4	1605-1622	N
miR5268a-5p	TAACAAAGTCTGAATGGT	TRINITY_DN40459_c0_g5	PREDICTED: iron-sulfur protein NUBPL [Juglans regia]	GO:0005739(mitochondrion)	-	nubpl	3	1543-1560	N
miR5268a-5p	TAACAAAGTCTGAATGGT	TRINITY_DN42842_c0_g3	PREDICTED: ferredoxin, root R-B1-like [Juglans regia]	GO:0009055(electron carrier activity);GO:0009507(chloroplast);GO:0009536(plastid);GO:0022900(electron transport chain);GO:0046872(metal ion binding);GO:0051537(2 iron, 2 sulfur cluster binding)	ko00195(Photosynthesis)	FDX3	4	167-184	N
miR5268a-5p	TAACAAAGTCTGAATGGT	TRINITY_DN42980_c0_g4	PREDICTED: glutamyl-tRNA(Gln) amidotransferase subunit A, chloroplastic/mitochondrial [Juglans regia]	GO:0005524(ATP binding);GO:0005739(mitochondrion);GO:0009507(chloroplast);GO:0009570(chloroplast stroma);GO:0030956(glutamyl-tRNA(Gln) amidotransferase complex);GO:0032543(mitochondrial translation);GO:0050567(glutaminyl-tRNA synthase (glutamine-hydrolyzing) activity);GO:0070681(glutaminyl-tRNAGln biosynthesis via transamidation)	ko00970(Aminoacyl-tRNA biosynthesis)	GATA	3.5	1635-1652	N
miR5268a-5p	TAACAAAGTCTGAATGGT	TRINITY_DN44229_c0_g2	PREDICTED: F-box protein At2g27310-like [Juglans regia]	GO:0003674(molecular_function);GO:0008150(biological_process)	ko04075(Plant hormone signal transduction)	At2g27310	4	589-605	N
miR5268a-5p	TAACAAAGTCTGAATGGT	TRINITY_DN45289_c0_g8	-	-	-	-	4	544-561	N
miR5268a-5p	TAACAAAGTCTGAATGGT	TRINITY_DN45474_c0_g1	-	-	-	-	3.5	43-60	N
miR5268a-5p	TAACAAAGTCTGAATGGT	TRINITY_DN45919_c1_g1	PREDICTED: auxin-responsive protein SAUR36-like [Juglans regia]	GO:0005739(mitochondrion);GO:0009733(response to auxin)	ko04075(Plant hormone signal transduction)	SAUR36	4	974-990	N
miR5268a-5p	TAACAAAGTCTGAATGGT	TRINITY_DN47717_c0_g9	PREDICTED: uncharacterized protein LOC107428731 [Ziziphus jujuba]	GO:0003674(molecular_function);GO:0005886(plasma membrane);GO:0008150(biological_process)	-	-	4	344-360	N
miR5268a-5p	TAACAAAGTCTGAATGGT	TRINITY_DN48395_c2_g6	-	-	-	-	4	106-122	N
miR5268a-5p	TAACAAAGTCTGAATGGT	TRINITY_DN48699_c0_g2	PREDICTED: uncharacterized protein LOC108981807 isoform X1 [Juglans regia]	GO:0001046(core promoter sequence-specific DNA binding);GO:0001228(transcriptional activator activity, RNA polymerase II transcription regulatory region sequence-specific binding);GO:0005634(nucleus);GO:0006366(transcription from RNA polymerase II promoter)	-	-	3	2083-2099	N
miR5268a-5p	TAACAAAGTCTGAATGGT	TRINITY_DN49107_c0_g5	PREDICTED: probable LRR receptor-like serine/threonine-protein kinase At1g67720 [Juglans regia]	GO:0005886(plasma membrane);GO:0007165(signal transduction)	ko04626(Plant-pkogen interaction)	At2g14510	3.5	1737-1753	N
miR5268a-5p	TAACAAAGTCTGAATGGT	TRINITY_DN50611_c0_g5	PREDICTED: uncharacterized protein LOC109001100 [Juglans regia]	GO:0003676(nucleic acid binding);GO:0005622(intracellular);GO:0005634(nucleus)	-	-	4	602-619	N
miR5268a-5p	TAACAAAGTCTGAATGGT	TRINITY_DN50727_c0_g1	PREDICTED: zinc finger CCCH domain-containing protein 64 [Juglans regia]	GO:0003676(nucleic acid binding);GO:0003677(DNA binding);GO:0003824(catalytic activity);GO:0005634(nucleus);GO:0005829(cytosol);GO:0046872(metal ion binding)	-	At5g56900	4	156-172	N
miR5268a-5p	TAACAAAGTCTGAATGGT	TRINITY_DN50764_c1_g1	PREDICTED: uncharacterized protein LOC108993227 [Juglans regia]	GO:0003824(catalytic activity);GO:0005515(protein binding);GO:0005622(intracellular);GO:0005623(cell);GO:0005730(nucleolus);GO:0005739(mitochondrion);GO:0005777(peroxisome);GO:0016301(kinase activity);GO:0016310(phosphorylation);GO:0043574(peroxisomal transport)	-	-	4	895-912	N
miR5268a-5p	TAACAAAGTCTGAATGGT	TRINITY_DN50961_c0_g2	PREDICTED: uncharacterized protein LOC109022047 isoform X1 [Juglans regia]	GO:0003674(molecular_function);GO:0005886(plasma membrane)	-	-	4	508-525	N
miR5268a-5p	TAACAAAGTCTGAATGGT	TRINITY_DN51031_c1_g1	PREDICTED: phosphatidylinositol/phosphatidylcholine transfer protein SFH13-like isoform X1 [Juglans regia]	GO:0000139(Golgi membrane);GO:0005215(transporter activity);GO:0005794(Golgi apparatus);GO:0005886(plasma membrane);GO:0006810(transport);GO:0015031(protein transport)	ko00970(Aminoacyl-tRNA biosynthesis)	SFH13	4	711-727	N
miR5268a-5p	TAACAAAGTCTGAATGGT	TRINITY_DN51643_c0_g3	-	-	-	-	4	142-160	N
miR5268a-5p	TAACAAAGTCTGAATGGT	TRINITY_DN52111_c0_g8	-	-	-	-	4	232-248	N
miR5268a-5p	TAACAAAGTCTGAATGGT	TRINITY_DN53198_c1_g1	PREDICTED: probable LRR receptor-like serine/threonine-protein kinase At1g56140 isoform X1 [Juglans regia]	GO:0004674(protein serine/threonine kinase activity);GO:0005886(plasma membrane)	ko00520(Amino sugar and nucleotide sugar metabolism)	At1g56140	4	1059-1075	N
miR5268a-5p	TAACAAAGTCTGAATGGT	TRINITY_DN54846_c0_g8	-	-	-	-	4	31-48	N
miR5268a-5p	TAACAAAGTCTGAATGGT	TRINITY_DN55150_c0_g1	-	-	-	-	4	761-778	N
miR5268a-5p	TAACAAAGTCTGAATGGT	TRINITY_DN55217_c0_g2	PREDICTED: probable sulfate transporter 3.5 [Juglans regia]	GO:0005887(integral component of plasma membrane);GO:0015116(sulfate transmembrane transporter activity)	-	SULTR3;5	4	435-453	N
miR5268a-5p	TAACAAAGTCTGAATGGT	TRINITY_DN56266_c0_g1	PREDICTED: DUF21 domain-containing protein At1g55930, chloroplastic-like [Juglans regia]	GO:0005886(plasma membrane);GO:0006810(transport);GO:0009536(plastid);GO:0009941(chloroplast envelope);GO:0016021(integral component of membrane);GO:0016614(oxidoreductase activity, acting on CH-OH group of donors);GO:0031969(chloroplast membrane);GO:0050660(flavin adenine dinucleotide binding);GO:0055114(oxidation-reduction process)	-	CBSDUFCH2	4	783-800	N
miR5268a-5p	TAACAAAGTCTGAATGGT	TRINITY_DN56516_c0_g2	PREDICTED: putative GTP diphosphokinase RSH1, chloroplastic isoform X1 [Juglans regia]	GO:0008728(GTP diphosphokinase activity);GO:0008893(guanosine-3',5'-bis(diphosphate) 3'-diphosphatase activity);GO:0009507(chloroplast);GO:0015969(guanosine tetraphosphate metabolic process);GO:0042594(response to starvation)	-	RSH1	4	558-575	N
miR5268a-5p	TAACAAAGTCTGAATGGT	TRINITY_DN56645_c0_g2	PREDICTED: probable hydroxyacylglutathione hydrolase 2, chloroplastic isoform X2 [Juglans regia]	GO:0004416(hydroxyacylglutathione hydrolase activity);GO:0005739(mitochondrion);GO:0009507(chloroplast);GO:0019243(methylglyoxal catabolic process to D-lactate via S-lactoyl-glutathione);GO:0046872(metal ion binding)	ko00620(Pyruvate metabolism)	GLX2-4	4	383-399	N
miR5268a-5p	TAACAAAGTCTGAATGGT	TRINITY_DN57043_c0_g4	-	-	-	-	4	100-117	N
miR5268a-5p	TAACAAAGTCTGAATGGT	TRINITY_DN57050_c1_g1	PREDICTED: LEAF RUST 10 DISEASE-RESISTANCE LOCUS RECEPTOR-LIKE PROTEIN KINASE-like 2.3 [Juglans regia]	-	-	-	3.5	1031-1047	N
miR528a-3p	CCTGTGCCTGCCTCTTCCATT	TRINITY_DN33164_c0_g1	40S ribosomal protein S21 [Noccaea caerulescens]	GO:0000447(endonucleolytic cleavage in ITS1 to separate SSU-rRNA from 5.8S rRNA and LSU-rRNA from tricistronic rRNA transcript (SSU-rRNA, 5.8S rRNA, LSU-rRNA));GO:0000461(endonucleolytic cleavage to generate mature 3'-end of SSU-rRNA from (SSU-rRNA, 5.8S rRNA, LSU-rRNA));GO:0003735(structural constituent of ribosome);GO:0005622(intracellular);GO:0005840(ribosome);GO:0006412(translation);GO:002262…	ko03010(Ribosome)	rps21	4	1-22	N
miR528a-3p	CCTGTGCCTGCCTCTTCCATT	TRINITY_DN39722_c0_g2	STELAR K+ outward rectifier isoform 1 [Theobroma cacao]	GO:0005249(voltage-gated potassium channel activity);GO:0005887(integral component of plasma membrane);GO:0042391(regulation of membrane potential)	-	SKOR	4	195-215	N
miR528a-3p	CCTGTGCCTGCCTCTTCCATT	TRINITY_DN48501_c0_g2	PREDICTED: vacuolar protein sorting-associated protein 8 homolog [Juglans regia]	GO:0000124(SAGA complex);GO:0003712(transcription cofactor activity);GO:0006357(regulation of transcription from RNA polymerase II promoter);GO:0016573(histone acetylation)	-	Vps8	3.5	1427-1446	N
miR6020a	AAATGTTCTTCGAGTATCTTC	TRINITY_DN40431_c0_g3	PREDICTED: uncharacterized protein LOC109005030 [Juglans regia]	GO:0003723(RNA binding);GO:0005634(nucleus);GO:0009507(chloroplast);GO:0042646(plastid nucleoid);GO:1901259(chloroplast rRNA processing)	-	RAP	4	629-649	N
miR6020a	AAATGTTCTTCGAGTATCTTC	TRINITY_DN46790_c1_g2	PREDICTED: FRIGIDA-like protein 3 [Juglans regia]	GO:0005515(protein binding);GO:0005634(nucleus);GO:0009908(flower development);GO:0030154(cell differentiation)	ko03008(Ribosome biogenesis in eukaryotes);ko03018(RNA dkoadation)	FRL3	3.5	233-253	N
miR6020a	AAATGTTCTTCGAGTATCTTC	TRINITY_DN55320_c0_g2	PREDICTED: TMV resistance protein N-like isoform X2 [Juglans regia]	GO:0005515(protein binding)	ko03030(DNA replication);ko03420(Nucleotide excision repair);ko03430(komatch repair);ko03440(Homologous recombination)	-	4	72-91	N
miR6020a	AAATGTTCTTCGAGTATCTTC	TRINITY_DN57919_c0_g1	unnamed protein product, partial [Vitis vinifera]	-	-	-	4	138-157	N
miR6021a	TTGGAAGAGGCTGCTATTGGA	TRINITY_DN1175_c0_g1	-	-	-	-	4	686-705	N
miR6021a	TTGGAAGAGGCTGCTATTGGA	TRINITY_DN34236_c0_g2	PREDICTED: eukaryotic translation initiation factor 3 subunit L-like [Juglans regia]	GO:0003743(translation initiation factor activity);GO:0005852(eukaryotic translation initiation factor 3 complex)	ko03050(Proteasome)	v1g169424	4	434-453	N
miR6021a	TTGGAAGAGGCTGCTATTGGA	TRINITY_DN37163_c0_g2	PREDICTED: receptor like protein 30-like [Juglans regia]	-	-	-	2	890-910	N
miR6021a	TTGGAAGAGGCTGCTATTGGA	TRINITY_DN41509_c0_g1	PREDICTED: receptor-like protein 12 [Juglans regia]	GO:0006952(defense response);GO:0007165(signal transduction);GO:0016020(membrane);GO:0016021(integral component of membrane)	ko04626(Plant-pkogen interaction)	-	2	100-120	N
miR6021a	TTGGAAGAGGCTGCTATTGGA	TRINITY_DN42498_c1_g3	PREDICTED: respiratory burst oxidase homolog protein F-like [Prunus mume]	GO:0002679(respiratory burst involved in defense response);GO:0004601(peroxidase activity);GO:0005509(calcium ion binding);GO:0005515(protein binding);GO:0005886(plasma membrane);GO:0005887(integral component of plasma membrane);GO:0006952(defense response);GO:0007231(osmosensory signaling pathway);GO:0009723(response to ethylene);GO:0009738(abscisic acid-activated signaling pathway);GO:0009873(e…	ko04626(Plant-pkogen interaction)	RBOHF	4	1053-1074	N
miR6021a	TTGGAAGAGGCTGCTATTGGA	TRINITY_DN48909_c1_g1	-	-	-	-	4	229-248	N
miR6021a	TTGGAAGAGGCTGCTATTGGA	TRINITY_DN52522_c0_g4	PREDICTED: uncharacterized protein LOC108988557 isoform X1 [Juglans regia]	GO:0004328(formamidase activity);GO:0005575(cellular_component);GO:0016811(hydrolase activity, acting on carbon-nitrogen (but not peptide) bonds, in linear amides)	ko01200(Carbon metabolism);ko00630(Glyoxylate and dicarboxylate metabolism);ko00910(Nitrogen metabolism);ko00460(Cyanoamino acid metabolism)	SPAC869.04	4	1332-1352	N
miR6021a	TTGGAAGAGGCTGCTATTGGA	TRINITY_DN56674_c0_g4	PREDICTED: wall-associated receptor kinase 2-like [Juglans regia]	GO:0004674(protein serine/threonine kinase activity);GO:0005886(plasma membrane);GO:0007166(cell surface receptor signaling pathway)	ko04626(Plant-pkogen interaction)	WAKL11	4	304-324	N
miR6021a	TTGGAAGAGGCTGCTATTGGA	TRINITY_DN57409_c1_g2	PREDICTED: receptor-like protein 12 [Juglans regia]	GO:0006952(defense response);GO:0007165(signal transduction);GO:0016020(membrane);GO:0016021(integral component of membrane)	-	RLP30	2.5	171-191	N
miR6024a	TTTAGCAAGAGTTGTTTTACC	TRINITY_DN39515_c0_g4	PREDICTED: protein kinase and PP2C-like domain-containing protein [Juglans regia]	GO:0004674(protein serine/threonine kinase activity);GO:0004721(phosphoprotein phosphatase activity);GO:0004722(protein serine/threonine phosphatase activity);GO:0005524(ATP binding);GO:0005575(cellular_component);GO:0006468(protein phosphorylation);GO:0046872(metal ion binding)	ko04626(Plant-pkogen interaction)	Os01g0541900	4	2048-2067	N
miR6024a	TTTAGCAAGAGTTGTTTTACC	TRINITY_DN39751_c0_g4	PREDICTED: TMV resistance protein N-like [Juglans regia]	GO:0005515(protein binding)	ko03040(Spliceosome);ko04141(Protein processing in endoplasmic reticulum);ko04144(Endocytosis)	-	2.5	524-544	N
miR6024a	TTTAGCAAGAGTTGTTTTACC	TRINITY_DN39805_c0_g2	hypothetical protein CICLE_v10030540mg [Citrus clementina]	GO:0005515(protein binding);GO:0005524(ATP binding);GO:0005576(extracellular region);GO:0006952(defense response);GO:0043531(ADP binding)	ko01230(Biosynthesis of amino acids);ko00400(Phenylalanine, tyrosine and tryptophan biosynthesis)	RGA3	3	7-27	N
miR6024a	TTTAGCAAGAGTTGTTTTACC	TRINITY_DN40024_c0_g1	hypothetical protein CICLE_v10030540mg [Citrus clementina]	GO:0005515(protein binding);GO:0005524(ATP binding);GO:0005576(extracellular region);GO:0006952(defense response);GO:0043531(ADP binding)	ko01230(Biosynthesis of amino acids);ko00400(Phenylalanine, tyrosine and tryptophan biosynthesis)	RGA2	3	458-478	N
miR6024a	TTTAGCAAGAGTTGTTTTACC	TRINITY_DN48668_c0_g3	PREDICTED: TMV resistance protein N-like [Juglans regia]	GO:0005737(cytoplasm);GO:0006952(defense response);GO:0007165(signal transduction);GO:0016021(integral component of membrane);GO:0043531(ADP binding)	ko03040(Spliceosome);ko04141(Protein processing in endoplasmic reticulum);ko04144(Endocytosis)	-	4	220-240	N
miR6024a	TTTAGCAAGAGTTGTTTTACC	TRINITY_DN48871_c0_g1	PREDICTED: disease resistance protein RPM1-like [Juglans regia]	GO:0005524(ATP binding);GO:0005634(nucleus);GO:0006952(defense response);GO:0043531(ADP binding)	ko04626(Plant-pkogen interaction)	RPP13L4	1	207-227	N
miR6024a	TTTAGCAAGAGTTGTTTTACC	TRINITY_DN50475_c0_g1	PREDICTED: TMV resistance protein N-like [Juglans regia]	GO:0005515(protein binding)	ko03040(Spliceosome);ko04141(Protein processing in endoplasmic reticulum);ko04144(Endocytosis)	-	3.5	445-465	N
miR6024a	TTTAGCAAGAGTTGTTTTACC	TRINITY_DN52219_c0_g1	PREDICTED: putative disease resistance RPP13-like protein 1 [Juglans regia]	GO:0005515(protein binding);GO:0005524(ATP binding);GO:0005576(extracellular region);GO:0006952(defense response);GO:0043531(ADP binding)	ko03040(Spliceosome)	RPPL1	3.5	657-677	N
miR6024a	TTTAGCAAGAGTTGTTTTACC	TRINITY_DN55956_c1_g1	PREDICTED: endo-1,3;1,4-beta-D-glucanase-like [Juglans regia]	GO:0005634(nucleus);GO:0005737(cytoplasm);GO:0005829(cytosol);GO:0005886(plasma membrane);GO:0009651(response to salt stress);GO:0016787(hydrolase activity);GO:0048046(apoplast)	-	-	4	895-915	N
miR6024a	TTTAGCAAGAGTTGTTTTACC	TRINITY_DN56865_c1_g2	PREDICTED: disease resistance protein RPM1-like [Juglans regia]	GO:0005524(ATP binding);GO:0006952(defense response);GO:0043531(ADP binding)	ko04626(Plant-pkogen interaction)	RPP13L3	2	108-128	N
miR6024a	TTTAGCAAGAGTTGTTTTACC	TRINITY_DN57526_c1_g3	Leucine-rich repeat containing protein, putative isoform 1 [Theobroma cacao]	GO:0005515(protein binding);GO:0005524(ATP binding);GO:0005576(extracellular region);GO:0006952(defense response);GO:0043531(ADP binding)	ko03040(Spliceosome)	RGA3	3	498-518	N
miR6144a	TGGCAACTTCTTCATCATGCC	TRINITY_DN10903_c0_g1	-	-	-	-	4	55-76	N
miR6144a	TGGCAACTTCTTCATCATGCC	TRINITY_DN36782_c1_g1	40S ribosomal protein S17, partial [Noccaea caerulescens]	GO:0000028(ribosomal small subunit assembly);GO:0022627(cytosolic small ribosomal subunit)	ko03010(Ribosome)	RPS17	3.5	104-123	N
miR6144a	TGGCAACTTCTTCATCATGCC	TRINITY_DN38118_c0_g4	PREDICTED: uncharacterized protein LOC109001895 isoform X1 [Juglans regia]	GO:0003674(molecular_function);GO:0005739(mitochondrion);GO:0008150(biological_process);GO:0009507(chloroplast);GO:0009535(chloroplast thylakoid membrane);GO:0009536(plastid);GO:0009706(chloroplast inner membrane);GO:0009941(chloroplast envelope);GO:0016020(membrane);GO:0016021(integral component of membrane)	-	-	3.5	395-415	N
miR6144a	TGGCAACTTCTTCATCATGCC	TRINITY_DN43727_c2_g4	PREDICTED: importin-5-like [Ziziphus jujuba]	GO:0000059(protein import into nucleus, docking);GO:0000060(protein import into nucleus, translocation);GO:0005737(cytoplasm);GO:0006607(NLS-bearing protein import into nucleus);GO:0006610(ribosomal protein import into nucleus);GO:0008139(nuclear localization sequence binding);GO:0008565(protein transporter activity);GO:0031965(nuclear membrane);GO:0034399(nuclear periphery)	-	IPO5	2.5	1024-1044	N
miR6144a	TGGCAACTTCTTCATCATGCC	TRINITY_DN44884_c0_g3	PREDICTED: probable polyamine transporter At3g13620 [Juglans regia]	GO:0005887(integral component of plasma membrane);GO:0015179(L-amino acid transmembrane transporter activity);GO:0015203(polyamine transmembrane transporter activity);GO:0015297(antiporter activity)	ko03015(mRNA surveillance pkoway)	At3g13620	3	606-625	N
miR6144a	TGGCAACTTCTTCATCATGCC	TRINITY_DN46734_c0_g1	PREDICTED: SKP1-like protein 21 isoform X4 [Vitis vinifera]	GO:0004842(ubiquitin-protein transferase activity);GO:0005634(nucleus);GO:0006511(ubiquitin-dependent protein catabolic process);GO:0016567(protein ubiquitination);GO:0019005(SCF ubiquitin ligase complex)	ko04141(Protein processing in endoplasmic reticulum);ko04120(Ubiquitin mediated proteolysis)	ASK21	3.5	43-62	N
miR6144a	TGGCAACTTCTTCATCATGCC	TRINITY_DN48233_c0_g2	-	-	-	-	4	603-622	N
miR6144a	TGGCAACTTCTTCATCATGCC	TRINITY_DN49898_c0_g5	PREDICTED: uncharacterized protein LOC108987591 isoform X1 [Juglans regia]	GO:0003674(molecular_function);GO:0008150(biological_process);GO:0016021(integral component of membrane)	-	-	3.5	718-737	N
miR6144a	TGGCAACTTCTTCATCATGCC	TRINITY_DN50993_c0_g1	PREDICTED: uncharacterized protein LOC108987951 [Juglans regia]	GO:0051213(dioxygenase activity)	-	-	4	853-874	N
miR6144a	TGGCAACTTCTTCATCATGCC	TRINITY_DN61370_c0_g1	-	-	-	-	3.5	489-509	N
miR6145a	ATTGTTACATGTAGCACTGGCT	TRINITY_DN54344_c0_g1	PREDICTED: golgin subfamily A member 6-like protein 6 [Juglans regia]	GO:0003674(molecular_function);GO:0008150(biological_process);GO:0009507(chloroplast)	-	-	3.5	897-919	N
miR6146a	TTTGTCCAATGAAATACTTATC	TRINITY_DN37398_c4_g6	PREDICTED: ABSCISIC ACID-INSENSITIVE 5-like protein 7 [Juglans regia]	GO:0003677(DNA binding);GO:0003700(transcription factor activity, sequence-specific DNA binding);GO:0005515(protein binding);GO:0005634(nucleus);GO:0006351(transcription, DNA-templated);GO:0006355(regulation of transcription, DNA-templated);GO:0009414(response to water deprivation);GO:0009651(response to salt stress);GO:0009737(response to abscisic acid);GO:0009738(abscisic acid-activated signali…	ko04075(Plant hormone signal transduction)	ABF3	4	791-811	N
miR6146a	TTTGTCCAATGAAATACTTATC	TRINITY_DN41205_c0_g8	PREDICTED: guanylate-binding protein 1-like [Juglans regia]	GO:0003924(GTPase activity);GO:0005525(GTP binding);GO:0005634(nucleus);GO:0005730(nucleolus);GO:0006955(immune response);GO:0009507(chloroplast)	-	GBP2	3.5	940-960	N
miR6149a	TTGATACGCACCTGAATCGGC	TRINITY_DN48479_c0_g1	PREDICTED: F-box/kelch-repeat protein At3g23880-like [Juglans regia]	GO:0004842(ubiquitin-protein transferase activity);GO:0019005(SCF ubiquitin ligase complex);GO:0031146(SCF-dependent proteasomal ubiquitin-dependent protein catabolic process)	ko00970(Aminoacyl-tRNA biosynthesis)	At3g06240	4	87-107	N
miR6149a	TTGATACGCACCTGAATCGGC	TRINITY_DN56908_c0_g2	PREDICTED: F-box/kelch-repeat protein At3g23880-like [Juglans regia]	GO:0004842(ubiquitin-protein transferase activity);GO:0019005(SCF ubiquitin ligase complex);GO:0031146(SCF-dependent proteasomal ubiquitin-dependent protein catabolic process)	ko00970(Aminoacyl-tRNA biosynthesis)	CPR30	3	243-263	N
miR6155a	TAAGGTTGCCTTGCTCTTGCA	TRINITY_DN51760_c0_g4	PREDICTED: leucine-rich repeat receptor-like protein kinase PXL1 [Juglans regia]	GO:0001944(vasculature development);GO:0004674(protein serine/threonine kinase activity);GO:0005524(ATP binding);GO:0005886(plasma membrane);GO:0006468(protein phosphorylation);GO:0010067(procambium histogenesis);GO:0016021(integral component of membrane);GO:0016301(kinase activity);GO:0030154(cell differentiation)	ko04075(Plant hormone signal transduction)	PXL1	4	765-784	N
miR6155a	TAAGGTTGCCTTGCTCTTGCA	TRINITY_DN53521_c0_g9	PREDICTED: probable aspartyl protease At4g16563 [Juglans regia]	GO:0004190(aspartic-type endopeptidase activity);GO:0006508(proteolysis);GO:0030163(protein catabolic process)	-	At4g16563	4	118-137	N
miR6159a	TAGCATAGAATTCTCGCACCTA	TRINITY_DN44027_c1_g1	PREDICTED: uncharacterized protein LOC100250829 [Vitis vinifera]	GO:0005737(cytoplasm);GO:0008757(S-adenosylmethionine-dependent methyltransferase activity);GO:0032259(methylation)	-	-	4	236-257	N
miR6159a	TAGCATAGAATTCTCGCACCTA	TRINITY_DN51047_c0_g2	PREDICTED: uncharacterized protein LOC108991931 [Juglans regia]	GO:0005886(plasma membrane);GO:0008150(biological_process);GO:0016021(integral component of membrane);GO:0016740(transferase activity);GO:0016757(transferase activity, transferring glycosyl groups)	-	-	3.5	1079-1100	N
miR7122a-3p	ACCGTGTTTCTCTGTATAAGG	TRINITY_DN40213_c0_g6	PREDICTED: 60S ribosomal protein L8 [Capsicum annuum]	GO:0002181(cytoplasmic translation);GO:0003735(structural constituent of ribosome);GO:0022625(cytosolic large ribosomal subunit)	ko03010(Ribosome)	RPL8	3.5	94-113	N
miR7122b-3p	ACCGTGTTTCTCTGTATAAGG	TRINITY_DN40213_c0_g6	PREDICTED: 60S ribosomal protein L8 [Capsicum annuum]	GO:0002181(cytoplasmic translation);GO:0003735(structural constituent of ribosome);GO:0022625(cytosolic large ribosomal subunit)	ko03010(Ribosome)	RPL8	3.5	94-113	N
miR8155a	AACCTGGCTCTGATACCA	TRINITY_DN17957_c0_g2	ribosomal protein L35Ae [Coccomyxa subellipsoidea C-169]	GO:0002181(cytoplasmic translation);GO:0003735(structural constituent of ribosome);GO:0022625(cytosolic large ribosomal subunit);GO:0042273(ribosomal large subunit biogenesis)	ko03010(Ribosome)	RPL33A	3.5	247-264	N
miR8155a	AACCTGGCTCTGATACCA	TRINITY_DN37583_c0_g1	-	-	-	-	3	1538-1555	N
miR8155a	AACCTGGCTCTGATACCA	TRINITY_DN38274_c0_g4	PREDICTED: IRK-interacting protein-like [Juglans regia]	GO:0009567(double fertilization forming a zygote and endosperm)	-	-	4	356-372	N
miR8155a	AACCTGGCTCTGATACCA	TRINITY_DN38696_c1_g4	PREDICTED: protein STICHEL [Juglans regia]	GO:0003689(DNA clamp loader activity);GO:0005663(DNA replication factor C complex);GO:0006261(DNA-dependent DNA replication)	ko03030(DNA replication);ko03420(Nucleotide excision repair);ko03430(komatch repair)	STI	4	549-566	N
miR8155a	AACCTGGCTCTGATACCA	TRINITY_DN39766_c0_g4	PREDICTED: granule-bound starch synthase 1, chloroplastic/amyloplastic-like isoform X1 [Juglans regia]	GO:0004373(glycogen (starch) synthase activity);GO:0005515(protein binding);GO:0009507(chloroplast);GO:0009569(chloroplast starch grain);GO:0016757(transferase activity, transferring glycosyl groups);GO:0019252(starch biosynthetic process);GO:0033840(NDP-glucose-starch glucosyltransferase activity)	ko00500(Starch and sucrose metabolism)	WAXY	4	569-585	N
miR8155a	AACCTGGCTCTGATACCA	TRINITY_DN40478_c1_g2	PREDICTED: CRS2-associated factor 2, mitochondrial [Juglans regia]	GO:0003723(RNA binding);GO:0005739(mitochondrion);GO:0006397(mRNA processing);GO:0008380(RNA splicing);GO:0030529(intracellular ribonucleoprotein complex)	-	At5g54890	4	266-284	N
miR8155a	AACCTGGCTCTGATACCA	TRINITY_DN41461_c0_g1	PREDICTED: 30S ribosomal protein S16-2, chloroplastic/mitochondrial [Juglans regia]	GO:0003735(structural constituent of ribosome);GO:0015935(small ribosomal subunit);GO:0032543(mitochondrial translation)	ko03010(Ribosome)	RPS16-2	4	390-407	N
miR8155a	AACCTGGCTCTGATACCA	TRINITY_DN42385_c0_g2	PREDICTED: probable protein phosphatase 2C 68 [Juglans regia]	GO:0004722(protein serine/threonine phosphatase activity);GO:0005739(mitochondrion);GO:0006470(protein dephosphorylation);GO:0046872(metal ion binding)	ko00010(Glycolysis / Gluconeogenesis);ko00040(Pentose and glucuronate interconversions);ko00053(Ascorbate and aldarate metabolism);ko00620(Pyruvate metabolism);ko00071(Fatty acid dkoadation);ko00561(Glycerolipid metabolism);ko00280(Valine, leucine and isoleucine dkoadation);ko00310(Lysine dkoadation);ko00330(Arginine and proline metabolism);ko00340(Histidine metabolism);ko00380(Tryptophan metabol…	At5g06750	4	338-355	N
miR8155a	AACCTGGCTCTGATACCA	TRINITY_DN42713_c1_g1	PREDICTED: probable pre-mRNA-splicing factor ATP-dependent RNA helicase DEAH2 isoform X1 [Juglans regia]	GO:0004004(ATP-dependent RNA helicase activity);GO:0005634(nucleus);GO:0005737(cytoplasm);GO:0006396(RNA processing);GO:0044822(poly(A) RNA binding)	ko03040(Spliceosome)	At3g62310	4	1917-1935	N
miR8155a	AACCTGGCTCTGATACCA	TRINITY_DN43525_c1_g2	PREDICTED: dnaJ homolog subfamily B member 1-like [Juglans regia]	GO:0005737(cytoplasm);GO:0006457(protein folding);GO:0051082(unfolded protein binding)	ko04141(Protein processing in endoplasmic reticulum)	DNAJB4	4	694-710	N
miR8155a	AACCTGGCTCTGATACCA	TRINITY_DN44098_c0_g5	PREDICTED: uncharacterized protein LOC109002526 [Juglans regia]	-	-	-	4	1246-1263	N
miR8155a	AACCTGGCTCTGATACCA	TRINITY_DN44931_c0_g4	PREDICTED: uncharacterized protein LOC108991912 [Juglans regia]	GO:0003674(molecular_function);GO:0005634(nucleus);GO:0008150(biological_process)	-	-	3.5	227-243	N
miR8155a	AACCTGGCTCTGATACCA	TRINITY_DN46173_c0_g1	hypothetical protein KK1_023290 [Cajanus cajan]	-	-	-	4	291-308	N
miR8155a	AACCTGGCTCTGATACCA	TRINITY_DN47596_c1_g1	PREDICTED: 65-kDa microtubule-associated protein 8-like [Juglans regia]	GO:0000226(microtubule cytoskeleton organization);GO:0000911(cytokinesis by cell plate formation);GO:0000922(spindle pole);GO:0005634(nucleus);GO:0005819(spindle);GO:0005874(microtubule);GO:0007067(mitotic nuclear division);GO:0008017(microtubule binding);GO:0008283(cell proliferation);GO:0009524(phragmoplast);GO:0009574(preprophase band);GO:0048528(post-embryonic root development);GO:0055028(cor…	ko00190(Oxidative phosphorylation)	MAP65-8	4	1742-1758	N
miR8155a	AACCTGGCTCTGATACCA	TRINITY_DN48698_c0_g2	PREDICTED: probable magnesium transporter NIPA4 isoform X2 [Phoenix dactylifera]	GO:0005886(plasma membrane);GO:0008150(biological_process);GO:0015095(magnesium ion transmembrane transporter activity);GO:0016021(integral component of membrane)	-	At1g71900	4	535-552	N
miR8155a	AACCTGGCTCTGATACCA	TRINITY_DN49131_c0_g4	-	-	-	-	2	1025-1043	N
miR8155a	AACCTGGCTCTGATACCA	TRINITY_DN49474_c0_g14	-	-	-	-	4	430-446	N
miR8155a	AACCTGGCTCTGATACCA	TRINITY_DN49506_c1_g1	PREDICTED: cellulose synthase-like protein G3 isoform X1 [Juglans regia]	GO:0000139(Golgi membrane);GO:0000271(polysaccharide biosynthetic process);GO:0005886(plasma membrane);GO:0016021(integral component of membrane);GO:0016740(transferase activity);GO:0016757(transferase activity, transferring glycosyl groups);GO:0016759(cellulose synthase activity);GO:0016760(cellulose synthase (UDP-forming) activity);GO:0030244(cellulose biosynthetic process);GO:0071555(cell wall…	-	CSLG3	4	386-404	N
miR8155a	AACCTGGCTCTGATACCA	TRINITY_DN49794_c4_g4	PREDICTED: UBP1-associated protein 2C-like [Juglans regia]	GO:0000166(nucleotide binding);GO:0003723(RNA binding);GO:0005634(nucleus);GO:0005730(nucleolus);GO:0005829(cytosol);GO:0006952(defense response);GO:0008219(cell death);GO:0009693(ethylene biosynthetic process);GO:0010150(leaf senescence)	ko03040(Spliceosome)	UBA2C	3.5	854-872	N
miR8155a	AACCTGGCTCTGATACCA	TRINITY_DN50033_c1_g3	-	-	-	-	4	153-170	N
miR8155a	AACCTGGCTCTGATACCA	TRINITY_DN51332_c0_g1	DEAD-box ATP-dependent RNA helicase 56 [Gossypium arboreum]	GO:0000398(mRNA splicing, via spliceosome);GO:0004004(ATP-dependent RNA helicase activity);GO:0005681(spliceosomal complex);GO:0006406(mRNA export from nucleus);GO:0006974(cellular response to DNA damage stimulus);GO:0010468(regulation of gene expression);GO:0010501(RNA secondary structure unwinding)	ko03040(Spliceosome);ko03013(RNA transport);ko03015(mRNA surveillance pkoway)	RH15	3	2012-2028	N
miR8155a	AACCTGGCTCTGATACCA	TRINITY_DN52923_c0_g8	-	-	-	-	4	260-278	N
miR8155a	AACCTGGCTCTGATACCA	TRINITY_DN53881_c0_g1	hypothetical protein KK1_039570 [Cajanus cajan]	GO:0007165(signal transduction);GO:0016020(membrane)	-	-	4	352-369	N
miR8155a	AACCTGGCTCTGATACCA	TRINITY_DN53969_c0_g1	PREDICTED: LRR receptor-like serine/threonine-protein kinase ERECTA [Amborella trichopoda]	-	ko04120(Ubiquitin mediated proteolysis)	-	4	600-618	N
miR8155a	AACCTGGCTCTGATACCA	TRINITY_DN54182_c0_g1	PREDICTED: glucan endo-1,3-beta-glucosidase, basic isoform-like [Juglans regia]	GO:0005618(cell wall);GO:0005773(vacuole);GO:0008810(cellulase activity);GO:0030247(polysaccharide binding);GO:0046658(anchored component of plasma membrane)	ko00500(Starch and sucrose metabolism)	GNS1	4	1316-1333	N
miR8155a	AACCTGGCTCTGATACCA	TRINITY_DN54557_c0_g5	-	-	-	-	2	598-616	N
miR8155a	AACCTGGCTCTGATACCA	TRINITY_DN55528_c0_g5	-	-	-	-	0	591-608	N
miR8155a	AACCTGGCTCTGATACCA	TRINITY_DN56292_c1_g1	hypothetical protein VITISV_025425 [Vitis vinifera]	-	-	-	4	64-81	N
miR8155a	AACCTGGCTCTGATACCA	TRINITY_DN56727_c0_g2	Cellulose synthase like G3, putative [Theobroma cacao]	GO:0000139(Golgi membrane);GO:0000271(polysaccharide biosynthetic process);GO:0005886(plasma membrane);GO:0016021(integral component of membrane);GO:0016740(transferase activity);GO:0016757(transferase activity, transferring glycosyl groups);GO:0016759(cellulose synthase activity);GO:0016760(cellulose synthase (UDP-forming) activity);GO:0030244(cellulose biosynthetic process);GO:0071555(cell wall…	ko00500(Starch and sucrose metabolism);ko00520(Amino sugar and nucleotide sugar metabolism)	CSLG3	4	1650-1668	N
miR827a-3p	TTAGATGACCATCAGCAAACA	TRINITY_DN56763_c0_g1	PREDICTED: SPX domain-containing membrane protein At4g22990-like [Juglans regia]	GO:0005622(intracellular);GO:0005623(cell);GO:0006817(phosphate ion transport);GO:0009705(plant-type vacuole membrane);GO:0016021(integral component of membrane);GO:0055085(transmembrane transport)	-	At4g22990	1.5	65-85	N
miR858a-3p	CTCGTTGTCTGTTCGACCTTG	TRINITY_DN39656_c0_g4	GmMYB12 family protein [Populus trichocarpa]	GO:0003677(DNA binding);GO:0003700(transcription factor activity, sequence-specific DNA binding);GO:0005634(nucleus);GO:0006351(transcription, DNA-templated);GO:0006355(regulation of transcription, DNA-templated);GO:0006952(defense response);GO:0009620(response to fungus);GO:0009651(response to salt stress);GO:0009723(response to ethylene);GO:0009737(response to abscisic acid);GO:0009753(response…	ko00190(Oxidative phosphorylation);ko00860(Porphyrin and chlorophyll metabolism)	MYB108	3.5	572-591	N
miR858a-3p	CTCGTTGTCTGTTCGACCTTG	TRINITY_DN42308_c0_g5	PREDICTED: transcription factor MYB108-like [Juglans regia]	GO:0003677(DNA binding);GO:0003700(transcription factor activity, sequence-specific DNA binding);GO:0005634(nucleus);GO:0006351(transcription, DNA-templated);GO:0006355(regulation of transcription, DNA-templated);GO:0006952(defense response);GO:0009620(response to fungus);GO:0009651(response to salt stress);GO:0009723(response to ethylene);GO:0009737(response to abscisic acid);GO:0009753(response…	ko00190(Oxidative phosphorylation);ko00860(Porphyrin and chlorophyll metabolism)	MYB108	4	394-414	N
miR858a-3p	CTCGTTGTCTGTTCGACCTTG	TRINITY_DN43939_c1_g3	PREDICTED: protein ODORANT1-like [Juglans regia]	GO:0003677(DNA binding);GO:0003700(transcription factor activity, sequence-specific DNA binding);GO:0005634(nucleus);GO:0006355(regulation of transcription, DNA-templated);GO:0006970(response to osmotic stress);GO:0009611(response to wounding);GO:0009651(response to salt stress);GO:0009737(response to abscisic acid)	ko00190(Oxidative phosphorylation);ko00860(Porphyrin and chlorophyll metabolism)	MYB4	4	305-325	N
miR858a-3p	CTCGTTGTCTGTTCGACCTTG	TRINITY_DN56639_c0_g3	Uncharacterized protein TCM_016622 [Theobroma cacao]	GO:0008150(biological_process);GO:0016021(integral component of membrane)	-	-	3.5	256-277	N
miR9470a-3p	TTTGGCTCATGGATTTTAGC	TRINITY_DN38353_c0_g4	PREDICTED: ethylene-responsive transcription factor ERF113 [Nelumbo nucifera]	GO:0003677(DNA binding);GO:0003700(transcription factor activity, sequence-specific DNA binding);GO:0005634(nucleus);GO:0006351(transcription, DNA-templated);GO:0006355(regulation of transcription, DNA-templated);GO:0009414(response to water deprivation);GO:0009651(response to salt stress);GO:0009723(response to ethylene);GO:0009737(response to abscisic acid);GO:0009751(response to salicylic acid…	ko04075(Plant hormone signal transduction)	ERF113	3.5	464-483	N
miR9470a-3p	TTTGGCTCATGGATTTTAGC	TRINITY_DN46694_c0_g4	PREDICTED: pyruvate kinase, cytosolic isozyme [Cucumis melo]	GO:0000287(magnesium ion binding);GO:0004743(pyruvate kinase activity);GO:0005737(cytoplasm);GO:0005829(cytosol);GO:0006096(glycolytic process);GO:0016301(kinase activity);GO:0030955(potassium ion binding)	ko01200(Carbon metabolism);ko01230(Biosynthesis of amino acids);ko00010(Glycolysis / Gluconeogenesis);ko00620(Pyruvate metabolism);ko00230(Purine metabolism)	-	4	1219-1237	N
miR9470a-3p	TTTGGCTCATGGATTTTAGC	TRINITY_DN48992_c0_g1	PREDICTED: uncharacterized protein LOC109014513 [Juglans regia]	GO:0003735(structural constituent of ribosome);GO:0006412(translation)	-	mcfF	4	224-243	N
miR9470a-3p	TTTGGCTCATGGATTTTAGC	TRINITY_DN49574_c0_g3	PREDICTED: uncharacterized protein LOC109001885 [Juglans regia]	GO:0003674(molecular_function);GO:0005739(mitochondrion);GO:0008150(biological_process);GO:0016020(membrane)	-	-	4	1065-1083	N
miR9470a-3p	TTTGGCTCATGGATTTTAGC	TRINITY_DN53091_c0_g1	PREDICTED: RNA pseudouridine synthase 2, chloroplastic isoform X2 [Juglans regia]	GO:0000455(enzyme-directed rRNA pseudouridine synthesis);GO:0005829(cytosol);GO:0009982(pseudouridine synthase activity);GO:0019239(deaminase activity)	ko04626(Plant-pkogen interaction)	At1g76050	4	1278-1296	N
